# Supplementary material for: Evaluation of Adverse Effects of Resorbable Hyaluronic Acid Fillers: Determination of Macrophage Responses
Source: Int J Mol Sci. 2022 Jun 30;23(13):7275. doi: 10.3390/ijms23137275 (PMC9266407; doi:10.3390/ijms23137275)
Supplement: Supplementary file 1 [file ijms-23-07275-s001.zip]

Archive with 4 entries (4 files):
- De Jong et al IJMS Suppl Table S1.xlsx
- De Jong et al IJMS Suppl Table S2.xlsx
- De Jong et al IJMS Suppl Table S3.xlsx
- De Jong et al IJMS Supplementary Materials.pdf
