# Supplementary material for: Evaluation of Adverse Effects of Resorbable Hyaluronic Acid Fillers: Determination of Macrophage Responses
Source: Int J Mol Sci. 2022 Jun 30;23(13):7275. doi: 10.3390/ijms23137275 (PMC9266407; doi:10.3390/ijms23137275)
Supplement: Supplementary file 1 [file ijms-23-07275-s001.zip › De Jong et al IJMS Suppl Table S1.xlsx]

## Sheet: Read me
Supplementary Table S1
Output of the gene expression analyses for the cytokines and chemokines. For each of the selected groups of the in vitro experiments a paired analysis between the exposures and their controls was conducted using a moderated t-test of the Limma (Linear Models for Microarray Data) R-package. Log2 fold changes, p-values and Benjamini-Hochberg adjusted p-values are provided. Adjusted p-values <0.2 ar…
Part of
Evaluation of adverse effects of resorbable hyaluronic acid fillers: determination of macrophage responses.
Wim H. De Jong1, Danyel Jennen2, Peter H.J. Keizers3, Rob J. Vandebriel3, Hennie M. Hodemaekers3, Jolanda P. Vermeulen3, Frank Bakker3, Paul Schwillens3, Marcel van Herwijnen2, Marlon Jetten2, Jos C.S. Kleinjans2, Robert E. Geertsma3
1) Formerly Centre for Health Protection, National Institute for Public Health and the Environment (RIVM), Bilthoven, The Netherlands (retired)
2) Department of Toxicogenomics, GROW School for Oncology and Developmental Biology, Maastricht University, Maastricht, The Netherlands
3) Centre for Health Protection, National Institute for Public Health and the Environment (RIVM), Bilthoven, The Netherlands
Correspondance:
Wim H de Jong, whm.de.jong@ziggo.nl
Rob J. Vandebriel, rob.vandebriel@rivm.nl

## Sheet: RIVM
AgilentID	EntrezGeneID	GeneSymbol	RIVM1_logFC	RIVM1_P.Value	RIVM1_adj.P.Val	RIVM2_logFC	RIVM2_P.Value	RIVM2_adj.P.Val	RIVM3_logFC	RIVM3_P.Value	RIVM3_adj.P.Val	RIVM4_logFC	RIVM4_P.Value	RIVM4_adj.P.Val	RIVM5_logFC	RIVM5_P.Value	RIVM5_adj.P.Val
A_23_P259071	374	AREG	0.288912	0.293509	0.672536	0.286408	0.239837	0.675354	0.475935	0.0932895	0.433911	0.476518	0.0599385	0.660194	0.458603	0.0690336	0.742717
A_33_P3419190	374	AREG	0.290109	0.329799	0.702649	0.288505	0.273751	0.706186	0.539523	0.0808719	0.412226	0.376847	0.15864	0.781356	0.441283	0.102912	0.770172
A_23_P49759	6346	CCL1	0.176328	0.552501	0.843056	-0.203124	0.439608	0.814283	0.291019	0.331905	0.685798	-0.0290981	0.910938	0.992345	0.177468	0.498475	0.921829
A_33_P3324004	6359	CCL15	-0.398318	0.277196	0.656317	-0.88543	0.0124682	0.228764	-0.738253	0.0542609	0.353459	-0.264002	0.409823	0.910004	-0.301745	0.347889	0.883204
A_33_P3292478	6360	CCL16	0.224197	0.108333	0.450637	0.136201	0.257466	0.690562	0.217749	0.117977	0.469626	0.110823	0.353257	0.890528	0.073214	0.536275	0.93062
A_23_P55270	6362	CCL18	1.25587	0.0160109	0.210881	1.33759	0.00510556	0.161463	1.03912	0.0401382	0.312679	0.688105	0.111961	0.731468	0.606583	0.157244	0.80213
A_23_P123853	6363	CCL19	0.264297	0.158037	0.523371	0.0854668	0.593541	0.887323	-0.105522	0.561642	0.831891	0.164821	0.309724	0.873728	0.121953	0.448634	0.909414
A_23_P89431	6347	CCL2	-0.649248	0.00378354	0.125112	-0.98612	3.06722e-05	0.0131143	-0.809437	0.000683915	0.0748119	-0.382483	0.036912	0.608579	-0.520719	0.00710341	0.663867
A_23_P17065	6364	CCL20	-0.0891716	0.794496	0.941747	-0.352995	0.252499	0.685686	0.0135663	0.968353	0.990545	-0.047031	0.876073	0.988247	0.0363183	0.904128	0.988522
A_33_P3285945	6366	CCL21	-0.709032	0.0881315	0.41474	-1.00804	0.0101914	0.212826	-0.68786	0.0971021	0.439431	-0.710654	0.0557987	0.65071	-0.260274	0.458958	0.913052
A_24_P133905	6368	CCL23	-0.186549	0.385788	0.745821	-0.286719	0.140404	0.563905	-0.619698	0.0097133	0.18662	-0.386286	0.0534571	0.644018	-0.361211	0.0688145	0.742717
A_23_P215491	6369	CCL24	0.108714	0.183965	0.556929	-0.119125	0.104027	0.507838	-0.0123256	0.876555	0.960111	-0.0853711	0.233729	0.835821	0.192385	0.0136962	0.678204
A_23_P135248	10850	CCL27	-0.0414192	0.830402	0.952763	-0.0976986	0.568496	0.877289	0.208935	0.289082	0.652857	0.0958977	0.575568	0.948058	0.319906	0.0758096	0.746048
A_23_P503072	56477	CCL28	-0.0176324	0.926704	0.978384	-0.338966	0.0596559	0.418839	-0.52922	0.0134171	0.20939	-0.27772	0.115666	0.735997	-0.214438	0.21664	0.832954
A_33_P3316273	6348	CCL3	0.520236	0.0152789	0.206068	0.557253	0.00463761	0.155138	0.63966	0.00427583	0.136529	0.475945	0.0124174	0.489353	0.330814	0.066833	0.742717
A_33_P3296181	414062	CCL3L3	0.671863	0.0235834	0.243629	0.671875	0.0120072	0.22737	0.830893	0.00712256	0.166211	0.51101	0.0460789	0.627633	0.372752	0.133321	0.78694
A_24_P228130	414062	CCL3L3	0.639032	0.0213741	0.235082	0.614851	0.0133808	0.237356	0.848788	0.00389145	0.1346	0.470802	0.0484527	0.631245	0.283209	0.215481	0.832878
A_23_P207564	6351	CCL4	0.567941	0.210728	0.587901	0.184904	0.636015	0.902148	0.523771	0.246529	0.615031	0.202321	0.604835	0.953242	-0.00458748	0.990595	0.998614
A_33_P3354607	6351	CCL4	0.593223	0.202317	0.578902	0.230122	0.565964	0.876264	0.527451	0.254205	0.619812	0.260019	0.517272	0.93844	-0.0123528	0.975278	0.997037
A_33_P3354604	9560	CCL4L2	0.548575	0.0504597	0.334613	0.354166	0.140011	0.563494	0.504152	0.0695078	0.389239	0.128312	0.580475	0.948067	0.279805	0.237114	0.840933
A_33_P3354589	9560	CCL4L2	0.419504	0.376019	0.738862	0.0712504	0.862793	0.96936	0.209079	0.655766	0.877838	-0.132121	0.748926	0.975762	0.0307206	0.940576	0.992748
A_23_P152838	6352	CCL5	-0.251548	0.0927944	0.424065	-0.212543	0.105867	0.510351	-0.186426	0.203061	0.572939	-0.0909931	0.472379	0.93128	0.0566242	0.652956	0.950187
A_24_P295999	920	CD4	-0.235448	0.0262758	0.256831	-0.203771	0.0287016	0.319095	-0.266789	0.0136937	0.210309	-0.243153	0.0113243	0.476672	-0.123823	0.161736	0.804827
A_33_P3354940	1435	CSF1	0.383832	0.164187	0.532854	0.24651	0.303335	0.729389	0.15931	0.552648	0.827037	0.276807	0.24997	0.844976	0.260762	0.277262	0.855673
A_33_P3354935	1435	CSF1	0.162482	0.527267	0.829153	-0.0585614	0.794896	0.953467	0.0985932	0.700016	0.895402	-0.0235707	0.916586	0.992345	-0.0750788	0.739114	0.965135
A_33_P3330264	2919	CXCL1	0.656519	0.141054	0.500604	0.510562	0.190561	0.621526	0.646838	0.146584	0.509434	0.288724	0.450054	0.924434	0.28647	0.45353	0.911129
A_23_P7144	2919	CXCL1	0.760725	0.121251	0.473357	0.410274	0.330648	0.749897	0.522274	0.276942	0.641929	0.237082	0.569795	0.947716	0.184365	0.657796	0.950653
A_33_P3712341	6387	CXCL12	-0.0947555	0.802683	0.944846	-0.0501913	0.880577	0.973923	0.217592	0.567891	0.835225	0.241361	0.473818	0.93143	0.398407	0.244079	0.842545
A_23_P202448	6387	CXCL12	0.219942	0.138478	0.496828	-0.0143699	0.909148	0.981944	0.0987658	0.492756	0.792791	-0.0489137	0.698386	0.970896	-0.0255036	0.839582	0.981682
A_33_P3590259	9547	CXCL14	-0.0667091	0.851042	0.960348	-0.137373	0.661788	0.9108	0.112818	0.751073	0.915095	-0.084954	0.786326	0.980857	0.198572	0.52866	0.928997
A_33_P3351249	58191	CXCL16	0.183914	0.328016	0.701491	0.130783	0.427473	0.807084	-0.244939	0.198223	0.568691	-0.132682	0.420942	0.914347	-0.108858	0.507517	0.923249
A_23_P38505	58191	CXCL16	0.11265	0.520724	0.825365	0.00349877	0.981818	0.995936	0.156367	0.375807	0.717516	-0.00985788	0.948806	0.995464	0.213286	0.178447	0.815007
A_24_P257416	2920	CXCL2	0.749138	0.131052	0.486949	0.549073	0.203953	0.635764	0.805753	0.106403	0.453683	0.490842	0.253491	0.847564	0.32761	0.440257	0.906103
A_23_P315364	2920	CXCL2	0.970147	0.0675574	0.375305	0.720335	0.117687	0.528671	0.887638	0.0915092	0.431818	0.559386	0.216768	0.829433	0.534565	0.236806	0.840933
A_24_P183150	2921	CXCL3	0.58676	0.208181	0.586044	0.583803	0.158481	0.587453	0.698918	0.138128	0.499259	0.45597	0.26439	0.851865	0.362925	0.370611	0.886136
A_24_P277367	6374	CXCL5	0.151758	0.214772	0.591267	0.026835	0.798434	0.95388	0.175478	0.154987	0.518274	0.00877711	0.933365	0.994836	0.155295	0.153517	0.799002
A_32_P87013	3576	CXCL8	0.794796	0.0673393	0.374797	0.637021	0.0931329	0.484487	0.61591	0.147112	0.510125	0.552145	0.140884	0.770025	0.531002	0.155615	0.800352
A_33_P3243230	3576	CXCL8	1.25123	0.0108431	0.177061	0.753647	0.0653388	0.430467	0.959028	0.0414479	0.316078	0.481014	0.223454	0.831401	0.235222	0.543756	0.933298
A_23_P119478	10148	EBI3	0.135843	0.660286	0.892224	0.0875604	0.747566	0.938867	0.160518	0.603996	0.852703	0.0331573	0.902846	0.992345	0.0805284	0.767166	0.970075
A_33_P3383912	3123	HLA-DRB1	-0.165156	0.264259	0.643248	-0.210426	0.114569	0.52407	-0.30106	0.0518464	0.346491	-0.124187	0.338192	0.883827	-0.0294505	0.817626	0.978191
A_24_P343233	3123	HLA-DRB1	-0.104895	0.203933	0.58112	-0.144381	0.0558846	0.408542	-0.295991	0.00198411	0.109525	-0.24643	0.0030312	0.373846	-0.145825	0.0537574	0.729523
A_24_P403459	3441	IFNA4	0.223828	0.136637	0.495224	0.0552351	0.665828	0.912004	0.00909455	0.949853	0.984676	0.00336792	0.978923	0.998756	0.231082	0.0854502	0.763242
A_23_P409438	282616	IFNL2	0.294302	0.36068	0.727112	-0.207863	0.461671	0.827472	-0.0770521	0.808313	0.935545	-0.376655	0.191346	0.807004	-0.0528941	0.850107	0.982263
A_33_P3243887	3589	IL11	0.307896	0.363057	0.72941	0.173375	0.557932	0.872929	0.806927	0.0267836	0.268783	0.813837	0.0132691	0.491938	0.762746	0.0188767	0.678264
A_33_P3339625	27189	IL17C	-0.221441	0.282573	0.661481	-0.630853	0.00267523	0.11811	-0.107374	0.596713	0.849025	-0.171874	0.341982	0.885526	-0.152012	0.399066	0.895
A_23_P104798	3606	IL18	0.00944074	0.956537	0.987039	-0.181024	0.246959	0.680998	-0.477634	0.0135281	0.209453	-0.394159	0.019343	0.537462	-0.31125	0.0561575	0.734194
A_23_P79518	3553	IL1B	0.0910797	0.551954	0.842737	0.0734308	0.586082	0.884412	0.00120214	0.993697	0.998126	0.0643414	0.63287	0.959091	0.0815295	0.54594	0.933837
A_23_P501713	84639	IL1F10	0.102605	0.58471	0.857863	0.171031	0.307765	0.733667	0.315516	0.106702	0.454163	0.0583917	0.723442	0.974022	0.159738	0.339705	0.881628
A_33_P3246833	3557	IL1RN	-0.0382353	0.78838	0.94041	-0.00560911	0.964331	0.992845	0.387764	0.0144356	0.214269	0.360089	0.0107266	0.475695	0.339602	0.0149727	0.678264
A_33_P3246829	3557	IL1RN	-0.00436331	0.979296	0.995143	-0.0257898	0.861948	0.96936	0.472354	0.0121672	0.202033	0.385887	0.0184953	0.535498	0.331752	0.0382212	0.697783
A_23_P76078	51561	IL23A	0.0494581	0.786693	0.939686	-0.09274	0.566645	0.876395	-0.0322958	0.859639	0.954562	0.0837849	0.60431	0.953122	-0.0140525	0.930423	0.991416
A_33_P3232692	11009	IL24	0.228461	0.305351	0.683367	0.484089	0.0223367	0.289432	0.114179	0.603499	0.852395	0.11747	0.545125	0.94249	-0.0167768	0.930703	0.991475
A_33_P3284933	246778	IL27	0.0258532	0.882181	0.968532	0.100977	0.514417	0.852732	0.279642	0.124075	0.479665	0.295224	0.070073	0.68325	-0.025089	0.870419	0.983827
A_23_P5654	27178	IL37	0.839244	0.0326523	0.2832	0.690574	0.0441373	0.372514	0.784062	0.0439615	0.322665	0.35355	0.277848	0.861108	0.502837	0.130254	0.786207
A_24_P122137	3976	LIF	0.674631	0.058482	0.354742	0.605818	0.054467	0.405931	0.929983	0.0129157	0.206373	0.592457	0.0593504	0.659093	0.417589	0.170732	0.811275
A_23_P156683	4049	LTA	0.250119	0.264735	0.643694	0.0755242	0.696977	0.922453	-0.144156	0.514313	0.804929	0.0599989	0.756822	0.976691	-0.0868727	0.654488	0.950653
A_23_P1691	4312	MMP1	0.714679	0.000194613	0.0495471	0.810414	1.47318e-05	0.0107404	0.843537	3.71156e-05	0.0369575	0.268176	0.0538875	0.645012	-0.0253132	0.845935	0.981927
A_23_P161698	4314	MMP3	1.00362	4.79597e-05	0.0349654	1.09091	4.8417e-06	0.00689225	1.41454	9.95979e-07	0.0135317	0.684441	0.000555945	0.319799	0.528331	0.00417787	0.660016
A_23_P40174	4318	MMP9	-0.0521713	0.8104	0.947653	0.0263099	0.890772	0.976958	0.046876	0.829298	0.942841	0.0454551	0.812577	0.98312	0.0628041	0.743435	0.965482
A_23_P30024	4790	NFKB1	1.25064e-05	0.999939	0.999953	-0.121012	0.405686	0.796653	-0.0920268	0.574677	0.838046	-0.0772382	0.59298	0.950386	-0.0650423	0.652153	0.949958
A_33_P3277378	5008	OSM	0.304481	0.0585682	0.354742	-0.0824848	0.538297	0.864035	-0.062438	0.680205	0.886938	0.031383	0.813846	0.983357	0.0812714	0.544213	0.93349
A_23_P166408	5008	OSM	-0.347214	0.130443	0.486299	-0.756239	0.00130875	0.0842631	-0.591112	0.0158011	0.221663	-0.518184	0.016294	0.518096	0.128437	0.511939	0.924406
A_33_P3372666	5154	PDGFA	-0.0210985	0.84101	0.956883	-0.10159	0.282665	0.714399	-0.108986	0.30857	0.668162	-0.0473043	0.611299	0.954797	-0.0636414	0.495698	0.920365
A_23_P113701	5154	PDGFA	-0.0225224	0.796274	0.942581	-0.119091	0.136093	0.555324	-0.135056	0.136169	0.495672	-0.113567	0.153826	0.778404	-0.119922	0.13358	0.78694
A_23_P121596	5473	PPBP	0.215396	0.483481	0.804583	0.0174753	0.948145	0.989913	0.593138	0.0667766	0.382955	0.336423	0.222565	0.831176	0.237349	0.383376	0.889307
A_23_P7313	6696	SPP1	-0.0578598	0.627121	0.877459	-0.0717371	0.49621	0.843694	-0.122332	0.311108	0.669784	-0.0473493	0.651858	0.962457	0.000945393	0.992787	0.998669
A_24_P79054	7040	TGFB1	-0.0239176	0.792412	0.941052	-0.0340202	0.671712	0.913897	0.107503	0.247364	0.615566	0.0476956	0.553599	0.944758	0.0637037	0.431012	0.904037
A_23_P376488	7124	TNF	0.139446	0.581437	0.856672	0.0384307	0.862522	0.96936	0.0576266	0.819003	0.938795	-0.145182	0.515888	0.93842	0.177727	0.42809	0.902644
A_23_P152620	8741	TNFSF13	-0.00107408	0.991183	0.99738	-0.0912541	0.296172	0.724228	-0.229954	0.0297418	0.280213	-0.204442	0.0285868	0.579456	-0.00131445	0.987761	0.998377
A_23_P14174	10673	TNFSF13B	0.34862	0.149737	0.512217	0.0280428	0.891586	0.977084	0.017029	0.941818	0.98203	0.0357082	0.862243	0.987602	0.118915	0.565412	0.936455
A_23_P70398	7422	VEGFA	-0.0542481	0.786008	0.93951	-0.199304	0.267585	0.699921	0.111754	0.577535	0.83911	0.135584	0.445548	0.921739	0.291156	0.113404	0.775998
A_24_P12401	7422	VEGFA	-0.240134	0.229681	0.606868	-0.394691	0.0340551	0.338237	-0.0979895	0.616669	0.859488	-0.0221521	0.897447	0.991253	0.33117	0.0691659	0.742717

## Sheet: Bio-alcamid
AgilentID	EntrezGeneID	GeneSymbol	BioAlcamid_logFC	BioAlcamid_P.Value	BioAlcamid_adj.P.Val
A_23_P259071	374	AREG	0.492633	0.0527085	0.103409
A_33_P3419190	374	AREG	0.501592	0.0671376	0.126
A_23_P49759	6346	CCL1	1.62782	1.38772e-05	0.000125177
A_33_P3324004	6359	CCL15	-0.145084	0.647882	0.736256
A_33_P3292478	6360	CCL16	-0.00966261	0.934518	0.955527
A_23_P55270	6362	CCL18	5.43877	1.25163e-09	1.24102e-07
A_23_P123853	6363	CCL19	-0.00712311	0.964345	0.975977
A_23_P89431	6347	CCL2	-2.09845	2.81815e-09	2.33633e-07
A_23_P17065	6364	CCL20	-0.00116183	0.996925	0.998173
A_33_P3285945	6366	CCL21	-2.20235	1.23134e-05	0.000113948
A_24_P133905	6368	CCL23	-0.0267586	0.886343	0.919432
A_23_P215491	6369	CCL24	0.182956	0.0180085	0.0428195
A_23_P135248	10850	CCL27	0.331547	0.0667702	0.125434
A_23_P503072	56477	CCL28	-0.0941174	0.579528	0.678538
A_33_P3316273	6348	CCL3	1.35044	8.70802e-07	1.49618e-05
A_33_P3296181	414062	CCL3L3	1.90606	8.1247e-07	1.41231e-05
A_24_P228130	414062	CCL3L3	1.94869	2.60992e-07	5.94411e-06
A_23_P207564	6351	CCL4	0.867917	0.0388136	0.0804845
A_33_P3354607	6351	CCL4	0.932267	0.0313679	0.0677071
A_33_P3354604	9560	CCL4L2	1.14345	0.000156417	0.000864882
A_33_P3354589	9560	CCL4L2	1.10971	0.0154224	0.0377199
A_23_P152838	6352	CCL5	0.200475	0.125388	0.207584
A_24_P295999	920	CD4	-0.172165	0.0587866	0.113093
A_33_P3354940	1435	CSF1	2.37879	4.09974e-08	1.59286e-06
A_33_P3354935	1435	CSF1	1.16652	9.98914e-05	0.000601289
A_33_P3330264	2919	CXCL1	0.806944	0.0469208	0.0941607
A_23_P7144	2919	CXCL1	0.604901	0.159095	0.24993
A_33_P3712341	6387	CXCL12	0.386116	0.258268	0.367041
A_23_P202448	6387	CXCL12	0.130945	0.307161	0.42037
A_33_P3590259	9547	CXCL14	2.42277	1.18989e-06	1.87508e-05
A_33_P3351249	58191	CXCL16	0.968889	2.43303e-05	0.000194047
A_23_P38505	58191	CXCL16	0.18413	0.241701	0.34812
A_24_P257416	2920	CXCL2	1.52096	0.00228198	0.00776575
A_23_P315364	2920	CXCL2	2.10498	0.000221065	0.00114472
A_24_P183150	2921	CXCL3	1.3272	0.00424357	0.012943
A_24_P277367	6374	CXCL5	0.297573	0.0115442	0.0297059
A_32_P87013	3576	CXCL8	2.36879	8.15781e-06	8.27397e-05
A_33_P3243230	3576	CXCL8	3.25002	4.1121e-07	8.41707e-06
A_23_P119478	10148	EBI3	0.558848	0.0540934	0.105672
A_33_P3383912	3123	HLA-DRB1	-0.236487	0.0793127	0.144024
A_24_P343233	3123	HLA-DRB1	-0.206903	0.00961046	0.0255578
A_24_P403459	3441	IFNA4	0.151929	0.244536	0.351296
A_23_P409438	282616	IFNL2	0.443068	0.128392	0.21144
A_33_P3243887	3589	IL11	-3.13922	2.04075e-08	9.36779e-07
A_33_P3339625	27189	IL17C	-0.693925	0.00128957	0.00482212
A_23_P104798	3606	IL18	-0.917465	2.16826e-05	0.000177463
A_23_P79518	3553	IL1B	1.80336	9.15292e-10	9.96892e-08
A_23_P501713	84639	IL1F10	0.178695	0.287374	0.398715
A_33_P3246833	3557	IL1RN	-0.501335	0.00105263	0.00408397
A_33_P3246829	3557	IL1RN	-0.469868	0.00579523	0.0168132
A_23_P76078	51561	IL23A	2.15148	9.85809e-10	1.04877e-07
A_33_P3232692	11009	IL24	1.20372	1.43414e-05	0.000128084
A_33_P3284933	246778	IL27	0.271404	0.0931053	0.163785
A_23_P5654	27178	IL37	1.69956	7.63433e-05	0.00048523
A_24_P122137	3976	LIF	0.19546	0.510675	0.618973
A_23_P156683	4049	LTA	-0.152192	0.436291	0.550622
A_23_P1691	4312	MMP1	1.3117	4.33899e-08	1.66494e-06
A_23_P161698	4314	MMP3	0.234617	0.153938	0.2439
A_23_P40174	4318	MMP9	-0.0141889	0.940949	0.959964
A_23_P30024	4790	NFKB1	0.502763	0.00294719	0.00959903
A_33_P3277378	5008	OSM	0.19132	0.164913	0.257471
A_23_P166408	5008	OSM	-0.54579	0.012202	0.0311035
A_33_P3372666	5154	PDGFA	-0.776368	4.52082e-07	9.01546e-06
A_23_P113701	5154	PDGFA	-0.844954	1.37059e-08	7.12247e-07
A_23_P121596	5473	PPBP	-1.51141	4.35691e-05	0.000309364
A_23_P7313	6696	SPP1	-0.993512	9.26755e-08	2.83236e-06
A_24_P79054	7040	TGFB1	-0.490385	1.74916e-05	0.000149563
A_23_P376488	7124	TNF	0.0332554	0.880871	0.915461
A_23_P152620	8741	TNFSF13	0.40389	0.000249426	0.00125973
A_23_P14174	10673	TNFSF13B	-0.258807	0.220411	0.324266
A_23_P70398	7422	VEGFA	0.848086	0.000201978	0.00106365
A_24_P12401	7422	VEGFA	0.927328	6.67284e-05	0.000436889

## Sheet: Perfectha
AgilentID	EntrezGeneID	GeneSymbol	FL_logFC	FL_P.Value	FL_adj.P.Val	Dm_logFC	Dm_P.Value	Dm_adj.P.Val	Dp_logFC	Dp_P.Value	Dp_adj.P.Val	SD_logFC	SD_P.Value	SD_adj.P.Val
A_23_P259071	374	AREG	0.417633	0.0376573	0.237558	0.438664	0.0301758	0.220327	0.463539	0.0231466	0.226172	0.353912	0.0722562	0.400192
A_33_P3419190	374	AREG	0.382373	0.0555944	0.28665	0.394725	0.0490307	0.276674	0.350378	0.0765209	0.379445	0.386976	0.0530589	0.357176
A_23_P49759	6346	CCL1	-0.377822	0.0870153	0.352192	-0.435789	0.0519937	0.283287	-0.0567966	0.786438	0.927466	-0.378814	0.0862697	0.427874
A_33_P3292478	6360	CCL16	-0.076258	0.392992	0.691598	-0.0401386	0.649934	0.864758	-0.0336728	0.703087	0.893101	-0.0422299	0.633139	0.877793
A_23_P26325	6361	CCL17	-0.399136	0.241325	0.559526	0.00332255	0.992024	0.997462	0.41377	0.225321	0.593025	0.016803	0.95968	0.990178
A_23_P55270	6362	CCL18	0.622876	0.0103168	0.128307	0.730659	0.00369532	0.0838337	0.908939	0.000684869	0.0528433	0.631015	0.00955053	0.178301
A_23_P123853	6363	CCL19	-0.224288	0.170089	0.476631	-0.162332	0.313148	0.638068	0.16747	0.298629	0.658078	-0.0452752	0.77482	0.93826
A_23_P89431	6347	CCL2	-1.36978	2.15711e-06	0.00308381	-1.14613	1.61115e-05	0.00872957	-0.83207	0.000384549	0.0409436	-0.948944	0.000112759	0.0279122
A_23_P17065	6364	CCL20	-0.501354	0.000455684	0.0291544	-0.589406	0.000101073	0.0197149	-0.444494	0.00124914	0.0687371	-0.520983	0.000323644	0.044332
A_33_P3285945	6366	CCL21	-0.0789991	0.71723	0.889407	0.028678	0.895191	0.968562	0.100725	0.644735	0.866741	-0.0247235	0.90957	0.978496
A_33_P3273623	6366	CCL21	-0.121778	0.602936	0.829522	0.0343055	0.882981	0.964331	0.356031	0.141634	0.491997	-0.000596026	0.997959	0.999846
A_24_P133905	6368	CCL23	-0.395576	0.0222388	0.186182	-0.545389	0.00319282	0.0780027	-0.388849	0.0242165	0.229836	-0.372908	0.0295968	0.288536
A_23_P215491	6369	CCL24	-0.26756	0.145317	0.444	-0.308683	0.0967947	0.376764	-0.135976	0.446633	0.766532	-0.0226655	0.898038	0.976487
A_23_P135248	10850	CCL27	0.133031	0.479553	0.756207	0.185272	0.328739	0.652978	0.419835	0.0375124	0.281858	0.11455	0.541733	0.837167
A_23_P503072	56477	CCL28	-0.512317	0.00182293	0.05467	-0.562736	0.000863708	0.0430653	-0.285805	0.0513115	0.320912	-0.311894	0.0355336	0.305765
A_33_P3316273	6348	CCL3	0.35293	0.0186052	0.170385	0.325297	0.0279329	0.212506	0.334771	0.0243187	0.230269	0.260197	0.070278	0.396556
A_33_P3296181	414062	CCL3L3	0.427358	0.0222446	0.186182	0.410856	0.0269802	0.208968	0.489747	0.0105994	0.162947	0.400126	0.0305603	0.290949
A_24_P228130	414062	CCL3L3	0.42684	0.0171744	0.164123	0.437185	0.0150916	0.158536	0.433617	0.0157806	0.192864	0.402701	0.0231727	0.261411
A_23_P207564	6351	CCL4	-0.0995978	0.406261	0.702714	-0.184682	0.134334	0.439288	-0.0238721	0.840398	0.947259	-0.165991	0.175209	0.561727
A_33_P3354607	6351	CCL4	-0.16076	0.175905	0.483207	-0.256974	0.038636	0.249555	-0.0706601	0.541342	0.819663	-0.199494	0.0984913	0.449262
A_33_P3354604	9560	CCL4L2	-0.10531	0.502047	0.771251	-0.100604	0.521057	0.793481	-0.222869	0.166503	0.522544	-0.1869	0.241315	0.633335
A_23_P152838	6352	CCL5	-0.149463	0.149401	0.449715	-0.0886544	0.381198	0.696878	-0.107622	0.290795	0.652037	-0.0964633	0.341866	0.71696
A_24_P295999	920	CD4	-0.168889	0.0492161	0.269975	-0.189788	0.0296506	0.218514	-0.128834	0.123039	0.465395	-0.179806	0.0378431	0.31193
A_33_P3354940	1435	CSF1	0.109758	0.549059	0.799616	-0.110937	0.54483	0.807002	0.0156596	0.931447	0.979132	0.0444314	0.807344	0.949135
A_33_P3354935	1435	CSF1	-0.222361	0.398637	0.696593	-0.260526	0.324936	0.650123	-0.304868	0.252283	0.619204	-0.0800166	0.758756	0.93281
A_33_P3822503	1489	CTF1	0.230894	0.564013	0.808436	0.0198074	0.960296	0.988165	0.0802186	0.840326	0.947259	-0.244741	0.54117	0.837009
A_33_P3330264	2919	CXCL1	0.524944	0.0185917	0.170385	0.590892	0.00957857	0.127483	0.573067	0.0114704	0.169498	0.509184	0.0217438	0.255129
A_23_P7144	2919	CXCL1	0.600345	0.00762168	0.109455	0.624606	0.00592332	0.10221	0.620897	0.00615625	0.131208	0.538876	0.0143805	0.2126
A_33_P3372840	6387	CXCL12	-0.229049	0.390974	0.690135	-0.177962	0.502883	0.781024	-0.153552	0.562426	0.830491	-0.617538	0.0313287	0.29413
A_33_P3712341	6387	CXCL12	-0.0686006	0.829721	0.938454	-0.462167	0.161595	0.474972	-0.132509	0.678524	0.882153	-0.363266	0.265017	0.655206
A_23_P202448	6387	CXCL12	-0.154515	0.287129	0.604871	-0.337497	0.0295796	0.218482	-0.149927	0.301123	0.660308	-0.15864	0.274966	0.662782
A_33_P3590259	9547	CXCL14	0.232998	0.137983	0.431907	0.142557	0.352458	0.672796	0.260473	0.100355	0.426755	0.194886	0.209505	0.602273
A_33_P3351249	58191	CXCL16	0.174946	0.12013	0.404673	0.0522056	0.629456	0.855259	0.0540991	0.617188	0.855524	0.134593	0.223864	0.615357
A_23_P38505	58191	CXCL16	-0.339791	0.086092	0.350726	-0.277004	0.154717	0.46664	-0.0843598	0.654223	0.870576	-0.440603	0.0310706	0.292835
A_24_P257416	2920	CXCL2	0.623673	0.0101744	0.127341	0.708029	0.004553	0.091346	0.692521	0.00528005	0.123053	0.640924	0.00863626	0.17064
A_23_P315364	2920	CXCL2	0.854156	0.00239683	0.0618409	0.892596	0.0017201	0.059743	0.892468	0.001722	0.0766722	0.833568	0.00286424	0.108273
A_24_P183150	2921	CXCL3	0.502607	0.0282864	0.207422	0.591221	0.0121257	0.14345	0.597431	0.0114179	0.169234	0.504089	0.0278948	0.281322
A_24_P277367	6374	CXCL5	0.0729258	0.485153	0.760129	0.00399858	0.969203	0.991155	0.214966	0.0525844	0.323577	0.102007	0.332783	0.710377
A_32_P87013	3576	CXCL8	0.68569	0.01824	0.16897	0.526866	0.0595501	0.303268	0.577408	0.0412246	0.291429	0.513841	0.0653599	0.387294
A_33_P3243230	3576	CXCL8	1.76492	7.4072e-05	0.0126295	1.7057	0.000103868	0.019941	1.68523	0.000116865	0.0261413	1.55255	0.000254058	0.0399641
A_23_P119478	10148	EBI3	-0.191853	0.10575	0.383178	-0.174697	0.137767	0.443882	-0.0552364	0.626788	0.859465	-0.11566	0.315307	0.695056
A_33_P3383912	3123	HLA-DRB1	-0.13238	0.224073	0.54104	-0.242203	0.0351803	0.236938	-0.209091	0.0639287	0.35126	-0.102859	0.339891	0.715195
A_24_P343233	3123	HLA-DRB1	-0.168822	0.0107249	0.13102	-0.134646	0.0344183	0.234329	-0.0810131	0.181107	0.540601	-0.0746803	0.21552	0.608865
A_24_P403459	3441	IFNA4	-0.25424	0.253214	0.570568	-0.266625	0.231872	0.558922	-0.318164	0.157927	0.512862	-0.401776	0.080345	0.417492
A_23_P409438	282616	IFNL2	-0.277527	0.196408	0.506431	-0.460035	0.040901	0.256015	-0.0568048	0.785527	0.927043	-0.414683	0.0619065	0.377996
A_33_P3243887	3589	IL11	-0.196561	0.333798	0.646201	0.0864194	0.666707	0.872693	0.111324	0.579862	0.839477	-0.134546	0.504516	0.821171
A_23_P29953	3600	IL15	0.0402867	0.87362	0.955403	-0.102027	0.687793	0.882766	0.159206	0.532298	0.814245	0.0722192	0.775755	0.938641
A_33_P3339625	27189	IL17C	-0.0599791	0.765237	0.911481	-0.0804969	0.688971	0.883661	0.0119662	0.952422	0.985108	-0.111882	0.579004	0.854741
A_23_P345692	53342	IL17D	0.112127	0.461066	0.744829	-0.178294	0.247904	0.574643	0.323809	0.0456733	0.305028	0.255256	0.106064	0.462005
A_23_P104798	3606	IL18	-0.344771	0.0128378	0.142993	-0.432051	0.00302665	0.0759997	-0.236217	0.0715694	0.368709	-0.223783	0.0860715	0.427356
A_23_P79518	3553	IL1B	0.0484852	0.691518	0.87731	0.00669365	0.956193	0.986972	-0.0568109	0.642326	0.866025	0.00805408	0.947303	0.986642
A_33_P3246833	3557	IL1RN	-0.00761985	0.925591	0.975401	0.0263222	0.747396	0.910198	0.0250113	0.759537	0.916363	-0.0794274	0.338172	0.714622
A_33_P3246829	3557	IL1RN	-0.0455436	0.672383	0.866972	-0.037926	0.724469	0.900286	-0.00365977	0.972806	0.990846	-0.0806285	0.457088	0.793586
A_23_P76078	51561	IL23A	-0.0837314	0.560316	0.806573	-0.0918114	0.523606	0.794947	-0.0507399	0.723145	0.901671	0.0484143	0.735296	0.923322
A_33_P3232692	11009	IL24	0.142705	0.526927	0.787063	-0.100448	0.65491	0.867026	-0.11313	0.615035	0.85446	0.0939307	0.675847	0.897808
A_33_P3284933	246778	IL27	-0.023963	0.911653	0.96995	-0.0238661	0.912009	0.973283	-0.129071	0.552513	0.825179	-0.29875	0.180387	0.566932
A_24_P122137	3976	LIF	0.303698	0.185391	0.493753	0.296267	0.19573	0.519297	0.340458	0.140646	0.49174	0.273098	0.230986	0.62355
A_23_P1691	4312	MMP1	0.426499	0.00416368	0.0814105	0.237682	0.0784441	0.342129	0.387445	0.00779469	0.143968	0.391365	0.00732012	0.157575
A_23_P161698	4314	MMP3	0.687402	0.00179037	0.0540256	0.574977	0.00629475	0.104707	0.914746	0.000152617	0.0297688	0.689058	0.00175766	0.0885079
A_23_P40174	4318	MMP9	0.0126673	0.928058	0.976564	0.0107112	0.939141	0.982687	-0.0055575	0.968399	0.989734	0.0108919	0.938117	0.984665
A_23_P30024	4790	NFKB1	-0.166843	0.0474482	0.26449	-0.122631	0.132924	0.437058	-0.0672445	0.396812	0.733577	-0.0868275	0.277893	0.664293
A_33_P3277378	5008	OSM	-0.0391393	0.837819	0.941331	0.0519155	0.786125	0.927184	-0.0781529	0.683417	0.884746	-0.016446	0.931419	0.983213
A_23_P166408	5008	OSM	-0.203843	0.299082	0.617095	-0.226526	0.250588	0.577316	-0.109188	0.57284	0.836128	-0.0415338	0.829352	0.956198
A_33_P3372666	5154	PDGFA	-0.122169	0.148662	0.448727	-0.125511	0.138638	0.445047	-0.0596119	0.468504	0.780105	-0.0560126	0.495312	0.815827
A_23_P113701	5154	PDGFA	-0.204911	0.00690542	0.104104	-0.125609	0.07357	0.332686	-0.136284	0.0544188	0.326589	-0.0861892	0.206105	0.598987
A_24_P79403	5196	PF4	-0.175193	0.533631	0.790565	-0.178786	0.525391	0.795657	0.036029	0.897465	0.967502	0.0738994	0.791729	0.944534
A_23_P121596	5473	PPBP	0.0791186	0.688487	0.875561	-0.05043	0.797971	0.931183	0.0765192	0.698157	0.891371	-0.0318432	0.871507	0.968554
A_23_P7313	6696	SPP1	-0.0789236	0.0944843	0.36397	-0.0261087	0.562951	0.817477	-0.0268027	0.552747	0.825233	-0.0609459	0.187955	0.575742
A_24_P79054	7040	TGFB1	0.0175862	0.758829	0.908285	0.0598901	0.304109	0.629759	0.0176056	0.758572	0.91595	0.0559773	0.335667	0.712945
A_23_P376488	7124	TNF	0.0267797	0.878276	0.957398	0.0416246	0.811948	0.937148	0.154409	0.383475	0.72306	0.0957249	0.585897	0.857279
A_23_P152620	8741	TNFSF13	0.0651405	0.567386	0.810072	-0.0402255	0.723012	0.899959	0.179898	0.12765	0.473038	0.112526	0.328637	0.707243
A_23_P14174	10673	TNFSF13B	-0.412298	0.0537514	0.282389	-0.163329	0.418995	0.725857	-0.126995	0.527871	0.812088	-0.255309	0.213831	0.606637
A_23_P70398	7422	VEGFA	-0.00517766	0.959242	0.986679	0.0481034	0.63627	0.857361	0.0661221	0.51712	0.805987	-0.0544849	0.592609	0.859789
A_24_P12401	7422	VEGFA	-0.0512634	0.727149	0.894067	-0.064417	0.661458	0.869693	-0.0762633	0.60465	0.850187	-0.0843528	0.567298	0.848268
