# Supplementary material for: Evaluation of Adverse Effects of Resorbable Hyaluronic Acid Fillers: Determination of Macrophage Responses
Source: Int J Mol Sci. 2022 Jun 30;23(13):7275. doi: 10.3390/ijms23137275 (PMC9266407; doi:10.3390/ijms23137275)
Supplement: Supplementary file 1 [file ijms-23-07275-s001.zip › De Jong et al IJMS Suppl Table S2.xlsx]

## Sheet: Read me
Supplementary Table S2
Over-representation analysis in PathVisio of differentially expressed genes (adjusted pvalue <0.05 or <0.2) from THP-1 derived macrophages exposed to Bio-Alcamid®, RIVM preparations and Perfectha® fillers
Sheet name	dermal filler	adjusted p-value DEGs
THP1_BioAlcamid_adjPvalue005	BioAlcamid®	<0.05
THP1_RIVM1_adjPvalue020	RIVM 1 preparation	<0.20
THP1_RIVM2_adjPvalue020	RIVM 2 preparation	<0.20
THP1_RIVM3_adjPvalue020	RIVM 3 preparation	<0.20
THP1_Perfectha_FL_adjPvalue005	Perfectha® FineLines	<0.05
THP1_Perfectha_Dm_adjPvalue005	Perfectha® Derm	<0.05
THP1_Perfectha_Dp_adjPvalue005	Perfectha® Deep	<0.05
THP1_Perfectha_SD_adjPvalue005	Perfectha® SubSkin	<0.05
Part of
Evaluation of adverse effects of resorbable hyaluronic acid fillers: determination of macrophage responses.
Wim H. De Jong1, Danyel Jennen2, Peter H.J. Keizers3, Rob J. Vandebriel3, Hennie M. Hodemaekers3, Jolanda P. Vermeulen3, Frank Bakker3, Paul Schwillens3, Marcel van Herwijnen2, Marlon Jetten2, Jos C.S. Kleinjans2, Robert E. Geertsma3
1) Formerly Centre for Health Protection, National Institute for Public Health and the Environment (RIVM), Bilthoven, The Netherlands (retired)
2) Department of Toxicogenomics, GROW School for Oncology and Developmental Biology, Maastricht University, Maastricht, The Netherlands
3) Centre for Health Protection, National Institute for Public Health and the Environment (RIVM), Bilthoven, The Netherlands
Correspondance:
Wim H de Jong, whm.de.jong@ziggo.nl
Rob J. Vandebriel, rob.vandebriel@rivm.nl

## Sheet: THP1_BioAlcamid_adjPvalue005
Statistics results for Fri Dec 10 19:47:29 CET 2021
Dataset: J:\FHML_TGX\Danyel.Jennen\ProjectFolder\Projects\Filler-project\THP1_RIVM\pathvisio\noflags\THP1_RIVM_BioAlcamid_limma_OUTPUT_TABLE.pgex
Pathway directory: D:\wikipathways-20211110-gpml-Homo_sapiens
Gene database: D:\pathvisio-3.3.0\Hs_Derby_Ensembl_91.bridge
Criterion: [BioAlcamid_adj.P.Val] < 0.05
Calculation method: pathway-centric. Calculations are performed after mapping data to pathways.
Total data points (N): 8427
Data points meeting criterion (R): 4748
Pathway	positive (r)	measured (n)	total	%	Z Score	p-value (permuted)
IL-3 signaling pathway	33	43	50	0.7674	2.7	0.009
Apoptosis modulation by HSP70	14	16	22	0.875	2.52	0.002
Macrophage markers	8	8	10	1	2.49	0.005
Mevalonate arm of cholesterol biosynthesis pathway	11	12	55	0.9167	2.47	0.013
Kit receptor signaling pathway	38	52	60	0.7308	2.44	0.01
IL-4 signaling pathway	36	49	55	0.7347	2.42	0.013
Interferon type I signaling pathways	36	49	57	0.7347	2.42	0.017
Signal transduction through IL1R	21	27	34	0.7778	2.25	0.025
Splicing factor NOVA regulated synaptic proteins	22	29	44	0.7586	2.12	0.035
p53 transcriptional gene network	40	57	78	0.7018	2.11	0.029
Hepatitis C and hepatocellular carcinoma	33	46	63	0.7174	2.11	0.028
Prolactin signaling pathway	46	67	79	0.6866	2.04	0.026
Host-pathogen interaction of human coronaviruses - interferon induction	23	31	47	0.7419	2.01	0.05
Angiotensin II receptor type 1 pathway	15	19	37	0.7895	1.99	0.041
Prostaglandin and leukotriene metabolism in senescence	17	22	57	0.7727	1.98	0.05
Oncostatin M signaling pathway	42	61	66	0.6885	1.98	0.047
Endochondral ossification with skeletal dysplasias	30	42	69	0.7143	1.98	0.044
Endochondral ossification	30	42	69	0.7143	1.98	0.044
Cell-type dependent selectivity of CCK2R signaling	5	5	26	1	1.97	0.048
mir-124 predicted interactions with cell cycle and differentiation	5	5	8	1	1.97	0.017
Osteoblast signaling	5	5	18	1	1.97	0.056
Apoptosis modulation and signaling	55	82	97	0.6707	1.97	0.046
Microglia pathogen phagocytosis pathway	24	33	44	0.7273	1.9	0.044
Canonical and non-canonical TGF-B signaling	10	12	18	0.8333	1.89	0.06
ncRNAs involved in STAT3 signaling in hepatocellular carcinoma	10	12	19	0.8333	1.89	0.046
Selenium micronutrient network	41	60	198	0.6833	1.88	0.051
Allograft Rejection	34	49	113	0.6939	1.85	0.075
Pluripotent stem cell differentiation pathway	16	21	64	0.7619	1.84	0.05
S1P receptor signal transduction	16	21	26	0.7619	1.84	0.072
Vitamin D in inflammatory diseases	16	21	25	0.7619	1.84	0.077
IL-5 signaling pathway	25	35	41	0.7143	1.8	0.066
Serotonin and anxiety-related events	7	8	16	0.875	1.78	0.073
Ketone bodies synthesis and degradation	4	4	13	1	1.76	0.072
SCFA and skeletal muscle substrate metabolism	4	4	17	1	1.76	0.074
IL-2 signaling pathway	26	37	43	0.7027	1.71	0.085
Glucocorticoid receptor pathway	36	53	73	0.6792	1.71	0.08
Aspirin and miRNAs	9	11	24	0.8182	1.7	0.07
TNF-alpha signaling pathway	55	84	97	0.6548	1.7	0.09
Sphingolipid metabolism overview	15	20	55	0.75	1.68	0.107
Mitochondrial complex III assembly	11	14	19	0.7857	1.68	0.111
SREBF and miR33 in cholesterol and lipid homeostasis	11	14	19	0.7857	1.68	0.116
Eicosanoid metabolism via lipooxygenases (LOX)	13	17	70	0.7647	1.67	0.082
Nanomaterial induced apoptosis	13	17	31	0.7647	1.67	0.084
Head and neck squamous cell carcinoma	43	65	81	0.6615	1.6	0.095
Novel intracellular components of RIG-I-like receptor (RLR) pathway	35	52	64	0.6731	1.6	0.13
Gastric cancer network 2	18	25	33	0.72	1.58	0.131
Photodynamic therapy-induced unfolded protein response	18	25	28	0.72	1.58	0.1
Sulfation biotransformation reaction	6	7	29	0.8571	1.57	0.111
Purinergic signaling	16	22	96	0.7273	1.55	0.114
Host-pathogen interaction of human coronaviruses - MAPK signaling	23	33	43	0.697	1.55	0.123
Thymic stromal lymphopoietin (TSLP) signaling pathway	28	41	49	0.6829	1.55	0.097
Progeria-associated lipodystrophy	14	19	36	0.7368	1.53	0.105
STING pathway in Kawasaki-like disease and COVID-19	14	19	26	0.7368	1.53	0.108
eIF5A regulation in response to inhibition of the nuclear export system	3	3	6	1	1.52	0.134
Oxytocin signaling	3	3	10	1	1.52	0.135
VEGFA-VEGFR2 signaling pathway	218	362	436	0.6022	1.52	0.114
RANKL/RANK signaling pathway	31	46	58	0.6739	1.51	0.126
p38 MAPK signaling pathway	21	30	36	0.7	1.51	0.135
Osteoclast signaling	8	10	21	0.8	1.51	0.138
Fas ligand pathway and stress induction of heat shock proteins	26	38	48	0.6842	1.5	0.13
Cholesterol biosynthesis pathway	10	13	32	0.7692	1.5	0.139
NAD+ metabolism	10	13	34	0.7692	1.5	0.15
TYROBP causal network in microglia	34	51	61	0.6667	1.49	0.13
miRNAs involved in DNA damage response	19	27	70	0.7037	1.47	0.133
Peptide GPCRs	19	27	79	0.7037	1.47	0.135
Type II interferon signaling (IFNG)	19	27	38	0.7037	1.47	0.139
EPO receptor signaling	17	24	27	0.7083	1.43	0.134
Type I collagen synthesis in the context of osteogenesis imperfecta	17	24	36	0.7083	1.43	0.146
TGF-beta receptor signaling in skeletal dysplasias	30	45	60	0.6667	1.4	0.166
Sphingolipid metabolism: integrated pathway	15	21	97	0.7143	1.4	0.166
Notch signaling	25	37	48	0.6757	1.38	0.17
4-hydroxytamoxifen, Dexamethasone, and Retinoic Acids Regulation of p27 Expression	13	18	31	0.7222	1.36	0.15
Integrated cancer pathway	28	42	50	0.6667	1.35	0.165
Pathways of nucleic acid metabolism and innate immune sensing	11	15	39	0.7333	1.33	0.198
Thyroid stimulating hormone (TSH) signaling pathway	37	57	67	0.6491	1.31	0.171
NRF2 pathway	61	97	145	0.6289	1.31	0.18
BMP signaling in eyelid development	9	12	23	0.75	1.3	0.199
Nanoparticle triggered regulated necrosis	9	12	26	0.75	1.3	0.179
Serotonin and anxiety	9	12	22	0.75	1.3	0.185
Interleukin-11 signaling pathway	26	39	45	0.6667	1.3	0.176
Nucleotide GPCRs	7	9	15	0.7778	1.3	0.2
Apoptosis	46	72	88	0.6389	1.3	0.182
Immune response to tuberculosis	16	23	24	0.6957	1.28	0.237
Orexin receptor pathway	62	99	225	0.6263	1.27	0.219
Network map of SARS-CoV-2 signaling pathway	95	155	324	0.6129	1.25	0.234
Regulatory circuits of the STAT3 signaling pathway	38	59	79	0.6441	1.25	0.214
Cholesterol metabolism with Bloch and Kandutsch-Russell pathways	24	36	97	0.6667	1.25	0.215
Biosynthesis and regeneration of tetrahydrobiopterin and catabolism of phenylalanine	2	2	38	1	1.24	0.225
HIPK2 in kidney fibrosis	2	2	8	1	1.24	0.252
Mevalonate arm of cholesterol biosynthesis pathway with inhibitors	2	2	64	1	1.24	0.208
Tyrosine metabolism	2	2	27	1	1.24	0.232
Host-pathogen interaction of human coronaviruses - apoptosis	14	20	34	0.7	1.23	0.239
Retinoblastoma gene in cancer	51	81	98	0.6296	1.21	0.241
Nucleotide-binding oligomerization domain (NOD) pathway	22	33	43	0.6667	1.2	0.228
Effect of progerin on genes involved in Hutchinson-Gilford progeria syndrome	17	25	30	0.68	1.18	0.23
Gastric cancer network 1	17	25	30	0.68	1.18	0.239
Interleukin-1 (IL-1) structural pathway	28	43	52	0.6512	1.16	0.238
IL-1 signaling pathway	31	48	57	0.6458	1.15	0.254
Embryonic stem cell pluripotency pathways	46	73	123	0.6301	1.15	0.23
Hepatocyte growth factor receptor signaling	20	30	35	0.6667	1.14	0.25
Metabolism of spingolipids in ER and Golgi apparatus	10	14	72	0.7143	1.14	0.244
Regulation of sister chromatid separation at the metaphase-anaphase transition	10	14	16	0.7143	1.14	0.226
Photodynamic therapy-induced NFE2L2 (NRF2) survival signaling	15	22	24	0.6818	1.12	0.274
Copper homeostasis	29	45	58	0.6444	1.1	0.265
PPAR signaling pathway	29	45	76	0.6444	1.1	0.266
Leptin-insulin signaling overlap	8	11	20	0.7273	1.1	0.263
Primary focal segmental glomerulosclerosis (FSGS)	38	60	77	0.6333	1.1	0.288
Notch signaling pathway (Netpath)	32	50	62	0.64	1.09	0.274
Senescence and autophagy in cancer	57	92	112	0.6196	1.09	0.284
BDNF-TrkB signaling	18	27	38	0.6667	1.08	0.262
Hfe effect on hepcidin production	4	5	8	0.8	1.07	0.344
Lamin A-processing pathway	4	5	8	0.8	1.07	0.332
Methylation pathways	4	5	15	0.8	1.07	0.314
miR-517 relationship with ARCN1 and USP1	4	5	7	0.8	1.07	0.31
Somatic sex determination	4	5	15	0.8	1.07	0.287
Ethanol metabolism production of ROS by CYP2E1	6	8	28	0.75	1.06	0.277
NAD biosynthesis II (from tryptophan)	6	8	34	0.75	1.06	0.268
Transcription factors regulate miRNAs related to cardiac hypertrophy	6	8	16	0.75	1.06	0.322
Neurodegeneration with brain iron accumulation (NBIA) subtypes pathway	27	42	77	0.6429	1.04	0.317
TGF-beta receptor signaling	27	42	56	0.6429	1.04	0.305
Hair follicle development: cytodifferentiation - part 3 of 3	30	47	93	0.6383	1.04	0.333
Extracellular vesicle-mediated signaling in recipient cells	16	24	31	0.6667	1.02	0.272
Mitochondrial immune response to SARS-CoV-2	16	24	62	0.6667	1.02	0.31
Wnt signaling in kidney disease	16	24	39	0.6667	1.02	0.309
Zinc homeostasis	16	24	39	0.6667	1.02	0.311
Regulation of toll-like receptor signaling pathway	69	113	153	0.6106	1.02	0.313
Acute viral myocarditis	43	69	110	0.6232	1	0.323
Hypertrophy model	11	16	21	0.6875	1	0.351
Factors and pathways affecting insulin-like growth factor (IGF1)-Akt signaling	19	29	43	0.6552	1	0.347
Histone modifications	40	64	68	0.625	1	0.348
Parkinson's disease pathway	22	34	84	0.6471	0.99	0.322
TNF-related weak inducer of apoptosis (TWEAK) signaling pathway	25	39	45	0.641	0.98	0.329
Malignant pleural mesothelioma	183	310	468	0.5903	0.97	0.337
Intracellular trafficking proteins involved in CMT neuropathy	14	21	28	0.6667	0.96	0.324
Amplification and expansion of oncogenic pathways as metastatic traits	9	13	18	0.6923	0.94	0.384
Globo sphingolipid metabolism	9	13	28	0.6923	0.94	0.36
Neuroinflammation	9	13	31	0.6923	0.94	0.349
TLR4 signaling and tolerance	17	26	30	0.6538	0.93	0.402
DNA damage response (only ATM dependent)	58	95	118	0.6105	0.93	0.332
Oxidative damage response	20	31	44	0.6452	0.92	0.332
Translation inhibitors in chronically activated PDGFRA cells	26	41	49	0.6341	0.92	0.386
Hypothesized pathways in pathogenesis of cardiovascular disease	12	18	27	0.6667	0.88	0.373
Urea cycle and metabolism of amino groups	12	18	71	0.6667	0.88	0.384
Catalytic cycle of mammalian flavin-containing monooxygenases (FMOs)	1	1	14	1	0.88	0.395
COVID-19, thrombosis and anticoagulation	1	1	27	1	0.88	0.4
Downregulation of ACE2 expression by SARS-CoV infection and SARS-CoV spike protein	1	1	8	1	0.88	0.331
Evolocumab mechanism to reduce LDL cholesterol	1	1	5	1	0.88	0.39
FABP4 in ovarian cancer	1	1	3	1	0.88	0.369
Hormonal control of pubertal growth spurt	1	1	8	1	0.88	0.366
Influenza A virus infection	1	1	16	1	0.88	0.372
Model for regulation of MSMP expression in cancer cells and its proangiogenic role in ovarian tumors	1	1	6	1	0.88	0.372
PCSK9-mediated LDL receptor degradation	1	1	3	1	0.88	0.389
Autosomal recessive osteopetrosis pathways	7	10	14	0.7	0.87	0.361
ERK pathway in Huntington's disease	7	10	17	0.7	0.87	0.335
Genes associated with the development of rheumatoid arthritis	7	10	22	0.7	0.87	0.38
GPR40 pathway	7	10	20	0.7	0.87	0.372
Iron metabolism in placenta	7	10	15	0.7	0.87	0.362
Genes controlling nephrogenesis	15	23	45	0.6522	0.86	0.38
One-carbon metabolism	15	23	58	0.6522	0.86	0.381
ATM signaling pathway	24	38	50	0.6316	0.85	0.403
DNA replication	24	38	50	0.6316	0.85	0.404
miRNAs involvement in the immune response in sepsis	21	33	69	0.6364	0.85	0.422
Parkin-ubiquitin proteasomal system pathway	37	60	75	0.6167	0.83	0.385
Nuclear receptors meta-pathway	127	215	339	0.5907	0.82	0.399
SARS-CoV-2 innate immunity evasion and cell-specific immune response	31	50	92	0.62	0.81	0.425
Transcriptional activation by NRF2 in response to phytochemicals	10	15	20	0.6667	0.81	0.381
Activation of NLRP3 inflammasome by SARS-CoV-2	5	7	10	0.7143	0.81	0.396
COVID-19 adverse outcome pathway	5	7	24	0.7143	0.81	0.389
Insulin signaling	80	134	162	0.597	0.79	0.417
Host-pathogen interaction of human coronaviruses - autophagy	13	20	23	0.65	0.78	0.46
Nanoparticle triggered autophagic cell death	13	20	30	0.65	0.78	0.445
Physiological and pathological hypertrophy of the heart	13	20	27	0.65	0.78	0.386
Brain-derived neurotrophic factor (BDNF) signaling pathway	66	110	150	0.6	0.78	0.42
Antiviral and anti-inflammatory effects of Nrf2 on SARS-CoV-2 pathway	16	25	50	0.64	0.77	0.466
Sphingolipid metabolism in senescence	16	25	49	0.64	0.77	0.471
Nucleotide excision repair in xeroderma pigmentosum	35	57	62	0.614	0.77	0.444
Aflatoxin B1 metabolism	3	4	16	0.75	0.75	0.422
Benzene metabolism	3	4	17	0.75	0.75	0.415
Control of immune tolerance by vasoactive intestinal peptide	3	4	16	0.75	0.75	0.431
Linoleic acid metabolism affected by coronavirus infection	3	4	28	0.75	0.75	0.449
Metabolism of alpha-linolenic acid	3	4	27	0.75	0.75	0.426
miR-222 in exercise-induced cardiac growth	3	4	5	0.75	0.75	0.594
Peroxisomal beta-oxidation of tetracosanoyl-CoA	3	4	17	0.75	0.75	0.399
Robo4 and VEGF signaling pathways crosstalk	3	4	7	0.75	0.75	0.497
Serotonin receptor 2 and STAT3 signaling	3	4	6	0.75	0.75	0.511
Sulindac metabolic pathway	3	4	11	0.75	0.75	0.436
Tgif disruption of Shh signaling	3	4	10	0.75	0.75	0.398
Deregulation of Rab and Rab effector genes in bladder cancer	8	12	17	0.6667	0.72	0.439
Ganglio sphingolipid metabolism	8	12	56	0.6667	0.72	0.449
MAPK and NFkB signaling pathways inhibited by Yersinia YopJ	8	12	13	0.6667	0.72	0.488
Metabolic pathway of LDL, HDL and TG, including diseases	8	12	34	0.6667	0.72	0.497
RalA downstream regulated genes	8	12	13	0.6667	0.72	0.512
Phosphoinositides metabolism	23	37	89	0.6216	0.72	0.479
Eicosanoid synthesis	11	17	57	0.6471	0.7	0.448
Methionine de novo and salvage pathway	11	17	74	0.6471	0.7	0.489
Selective expression of chemokine receptors during T-cell polarization	11	17	30	0.6471	0.7	0.517
Prostaglandin signaling	14	22	40	0.6364	0.69	0.512
Non-genomic actions of 1,25 dihydroxyvitamin D3	34	56	97	0.6071	0.66	0.519
IL-18 signaling pathway	127	217	288	0.5853	0.66	0.498
EGF/EGFR signaling pathway	85	144	163	0.5903	0.66	0.535
Apoptosis-related network due to altered Notch3 in ovarian cancer	31	51	54	0.6078	0.64	0.518
CCL18 signaling pathway	21	34	177	0.6176	0.64	0.505
B cell receptor signaling pathway	49	82	99	0.5976	0.63	0.535
Cori cycle	6	9	53	0.6667	0.62	0.516
Cytokines and inflammatory response	6	9	32	0.6667	0.62	0.535
MFAP5-mediated ovarian cancer cell motility and invasiveness	6	9	18	0.6667	0.62	0.547
NAD metabolism, sirtuins and aging	6	9	16	0.6667	0.62	0.559
Nanomaterial-induced inflammasome activation	6	9	13	0.6667	0.62	0.538
Nod-like receptor (NLR) signaling pathway	6	9	11	0.6667	0.62	0.57
Omega-9 fatty acid synthesis	6	9	44	0.6667	0.62	0.516
FOXA2 pathway	9	14	23	0.6429	0.6	0.551
Kallmann syndrome	9	14	40	0.6429	0.6	0.551
PKC-gamma calcium signaling pathway in ataxia	9	14	29	0.6429	0.6	0.498
Ferroptosis	25	41	88	0.6098	0.6	0.55
Folate metabolism	25	41	142	0.6098	0.6	0.545
Integrin-mediated cell adhesion	51	86	102	0.593	0.56	0.596
Oxidative stress response	16	26	35	0.6154	0.53	0.614
Resistin as a regulator of inflammation	16	26	34	0.6154	0.53	0.59
Sphingolipid pathway	16	26	63	0.6154	0.53	0.576
Vitamin D-sensitive calcium signaling in depression	16	26	55	0.6154	0.53	0.554
Integrated breast cancer pathway	86	147	200	0.585	0.53	0.602
IL-6 signaling pathway	23	38	45	0.6053	0.52	0.597
Biomarkers for urea cycle disorders	4	6	51	0.6667	0.51	0.622
Estrogen metabolism	4	6	45	0.6667	0.51	0.643
Glucuronidation	4	6	41	0.6667	0.51	0.62
Insulin signaling in adipocytes (diabetic condition)	4	6	12	0.6667	0.51	0.603
Insulin signaling in adipocytes (normal condition)	4	6	15	0.6667	0.51	0.566
MicroRNA for targeting cancer growth and vascularization in glioblastoma	4	6	10	0.6667	0.51	0.613
miRNA biogenesis	4	6	7	0.6667	0.51	0.587
Pentose phosphate metabolism	4	6	21	0.6667	0.51	0.582
Pilocytic astrocytoma	4	6	14	0.6667	0.51	0.612
Serine metabolism	4	6	43	0.6667	0.51	0.638
Metapathway biotransformation Phase I and II	49	83	191	0.5904	0.5	0.635
Ovarian infertility	10	16	33	0.625	0.5	0.585
Serotonin receptor 2 and ELK-SRF/GATA4 signaling	10	16	24	0.625	0.5	0.558
FBXL10 enhancement of MAP/ERK signaling in diffuse large B-cell lymphoma	20	33	36	0.6061	0.49	0.627
Fatty acid transporters	7	11	28	0.6364	0.49	0.612
miR-509-3p alteration of YAP1/ECM axis	7	11	19	0.6364	0.49	0.608
Transcriptional cascade regulating adipogenesis	7	11	14	0.6364	0.49	0.64
T-cell receptor (TCR) signaling pathway	42	71	93	0.5915	0.48	0.615
Hepatitis B infection	69	118	155	0.5847	0.47	0.677
Osteoblast differentiation and related diseases	43	73	119	0.589	0.44	0.669
NRF2-ARE regulation	14	23	24	0.6087	0.44	0.668
Target of rapamycin (TOR) signaling	21	35	40	0.6	0.44	0.655
DNA repair pathways, full network	63	108	125	0.5833	0.42	0.676
ATM signaling in development and disease	25	42	49	0.5952	0.42	0.692
Hematopoietic stem cell gene regulation by GABP alpha/beta complex	11	18	26	0.6111	0.41	0.683
Neovascularisation processes	18	30	42	0.6	0.4	0.692
Prostaglandin synthesis and regulation	18	30	61	0.6	0.4	0.687
Male infertility	52	89	150	0.5843	0.4	0.688
MAPK signaling pathway	104	180	258	0.5778	0.39	0.701
Focal adhesion	88	152	201	0.5789	0.39	0.725
Interactions between LOXL4 and oxidative stress pathway	8	13	19	0.6154	0.38	0.699
Regulation of Wnt / B-catenin signaling by small molecule compounds	8	13	33	0.6154	0.38	0.676
EGFR tyrosine kinase inhibitor resistance	41	70	92	0.5857	0.38	0.702
Fatty acid beta-oxidation	15	25	71	0.6	0.37	0.705
Nanoparticle-mediated activation of receptor signaling	15	25	36	0.6	0.37	0.719
Unfolded protein response	15	25	28	0.6	0.37	0.754
GPCRs, class A rhodopsin-like	57	98	272	0.5816	0.37	0.703
Arylamine metabolism	2	3	13	0.6667	0.36	0.695
Conversion of angiotensinogen to angiotensin II	2	3	9	0.6667	0.36	0.622
Direct reversal repair	2	3	4	0.6667	0.36	0.628
Ethylmalonic encephalopathy	2	3	20	0.6667	0.36	0.723
MicroRNA network associated with chronic lymphocytic leukemia	2	3	10	0.6667	0.36	0.667
SARS-CoV-2 altering angiogenesis via NRP1	2	3	11	0.6667	0.36	0.671
SARS-CoV-2 and angiotensin-converting enzyme 2 receptor: molecular mechanisms	2	3	14	0.6667	0.36	0.729
Vitamins A and D - action mechanisms	2	3	14	0.6667	0.36	0.69
Canonical NF-kB pathway	5	8	9	0.625	0.35	0.713
IL-10 anti-inflammatory signaling pathway	5	8	19	0.625	0.35	0.73
Inclusion body myositis	5	8	27	0.625	0.35	0.744
LDLRAD4 and what we know about it	5	8	12	0.625	0.35	0.7
SARS-CoV-2 B.1.1.7 variant antagonises innate immune activation	5	8	15	0.625	0.35	0.745
Burn wound healing	42	72	124	0.5833	0.34	0.733
DNA IR-damage and cellular response via ATR	42	72	90	0.5833	0.34	0.739
Ras signaling	78	135	192	0.5778	0.34	0.739
Eicosanoid metabolism via cyclooxygenases (COX)	12	20	70	0.6	0.33	0.747
MTHFR deficiency	12	20	60	0.6	0.33	0.742
Photodynamic therapy-induced NF-kB survival signaling	16	27	36	0.5926	0.31	0.749
Monoamine GPCRs	9	15	43	0.6	0.29	0.764
Overview of nanoparticle effects	9	15	42	0.6	0.29	0.78
Nucleotide excision repair	24	41	44	0.5854	0.28	0.771
Overview of proinflammatory and profibrotic mediators	32	55	134	0.5818	0.28	0.793
Toll-like receptor signaling pathway	44	76	117	0.5789	0.27	0.764
miRNA regulation of p53 pathway in prostate cancer	13	22	37	0.5909	0.26	0.799
Circadian rhythm genes	78	136	209	0.5735	0.24	0.813
Cells and molecules involved in local acute inflammatory response	6	10	19	0.6	0.23	0.818
Familial hyperlipidemia type 1	6	10	35	0.6	0.23	0.812
FGF23 signaling in hypophosphatemic rickets and related disorders	6	10	28	0.6	0.23	0.82
Major receptors targeted by epinephrine and norepinephrine	6	10	34	0.6	0.23	0.822
Nonalcoholic fatty liver disease	75	131	170	0.5725	0.21	0.834
Proteoglycan biosynthesis	10	17	36	0.5882	0.21	0.839
Complement system in neuronal development and plasticity	42	73	137	0.5753	0.21	0.808
G1 to S cell cycle control	34	59	68	0.5763	0.2	0.841
ncRNAs involved in Wnt signaling in hepatocellular carcinoma	34	59	96	0.5763	0.2	0.826
16p11.2 distal deletion syndrome	14	24	46	0.5833	0.2	0.846
IL-17 signaling pathway	14	24	33	0.5833	0.2	0.843
Calcium regulation in cardiac cells	55	96	167	0.5729	0.19	0.846
Benzo(a)pyrene metabolism	3	5	17	0.6	0.16	0.85
Cholesterol biosynthesis with skeletal dysplasias	3	5	23	0.6	0.16	0.863
PTF1A related regulatory pathway	3	5	12	0.6	0.16	0.869
Somatroph axis (GH) and its relationship to dietary restriction and aging	3	5	12	0.6	0.16	0.852
AGE/RAGE pathway	35	61	67	0.5738	0.16	0.887
Joubert syndrome	35	61	87	0.5738	0.16	0.87
Sterol regulatory element-binding proteins (SREBP) signaling	35	61	77	0.5738	0.16	0.882
Sudden infant death syndrome (SIDS) susceptibility pathways	56	98	182	0.5714	0.16	0.874
Development and heterogeneity of the ILC family	7	12	33	0.5833	0.14	0.863
Differentiation of white and brown adipocyte	7	12	26	0.5833	0.14	0.891
ID signaling pathway	7	12	17	0.5833	0.14	0.89
Kennedy pathway from sphingolipids	7	12	35	0.5833	0.14	0.864
Mammalian disorder of sexual development	7	12	29	0.5833	0.14	0.9
Omega-3 / omega-6 fatty acid synthesis	7	12	53	0.5833	0.14	0.863
Autophagy	15	26	33	0.5769	0.14	0.896
Interactions between immune cells and microRNAs in tumor microenvironment	15	26	52	0.5769	0.14	0.886
Trans-sulfuration and one-carbon metabolism	15	26	66	0.5769	0.14	0.895
Type I interferon induction and signaling during SARS-CoV-2 infection	15	26	45	0.5769	0.14	0.876
NAD+ biosynthetic pathways	11	19	37	0.5789	0.14	0.885
Nucleotide metabolism	11	19	37	0.5789	0.14	0.858
Endoderm differentiation	57	100	147	0.57	0.13	0.883
Eukaryotic transcription initiation	20	35	42	0.5714	0.1	0.934
PI3K-AKT-mTOR signaling pathway and therapeutic opportunities	16	28	33	0.5714	0.09	0.916
Wnt signaling	46	81	121	0.5679	0.08	0.934
Ethanol effects on histone modifications	12	21	53	0.5714	0.07	0.948
Glycerolipids and glycerophospholipids	12	21	52	0.5714	0.07	0.941
Hippo-Yap signaling pathway	12	21	24	0.5714	0.07	0.96
T cell receptor and co-stimulatory signaling	12	21	45	0.5714	0.07	0.916
Clear cell renal cell carcinoma pathways	38	67	92	0.5672	0.06	0.965
Corticotropin-releasing hormone signaling pathway	38	67	98	0.5672	0.06	0.959
Extracellular vesicles in the crosstalk of cardiac cells	8	14	30	0.5714	0.06	0.935
MFAP5 effect on permeability and motility of endothelial cells via cytoskeleton rearrangement	8	14	20	0.5714	0.06	0.937
Riboflavin and CoQ disorders	8	14	59	0.5714	0.06	0.952
TGF-beta signaling in thyroid cells for epithelial-mesenchymal transition	8	14	20	0.5714	0.06	0.92
Ectoderm differentiation	56	99	145	0.5657	0.04	0.968
Neuroinflammation and glutamatergic signaling	56	99	178	0.5657	0.04	0.97
Genes targeted by miRNAs in adipocytes	4	7	19	0.5714	0.04	0.965
NIPBL role in DNA damage - Cornelia de Lange syndrome	4	7	9	0.5714	0.04	0.982
Serotonin transporter activity	4	7	15	0.5714	0.04	0.924
Valproic acid pathway	4	7	36	0.5714	0.04	0.974
Vitamin D metabolism	4	7	22	0.5714	0.04	0.981
Genotoxicity pathway	30	53	65	0.566	0.04	0.956
Cardiac progenitor differentiation	13	23	56	0.5652	0.02	0.983
Glycosylation and related congenital defects	13	23	73	0.5652	0.02	0.98
Nuclear receptors	13	23	44	0.5652	0.02	0.969
White fat cell differentiation	13	23	35	0.5652	0.02	0.97
Angiopoietin-like protein 8 regulatory pathway	62	110	157	0.5636	0	0.997
Interactome of polycomb repressive complex 2 (PRC2)	9	16	17	0.5625	-0.01	0.999
miRNA targets in ECM and membrane receptors	9	16	46	0.5625	-0.01	0.996
SARS coronavirus and innate immunity	9	16	33	0.5625	-0.01	0.976
Fibrin complement receptor 3 signaling pathway	18	32	47	0.5625	-0.01	0.996
Pre-implantation embryo	18	32	60	0.5625	-0.01	0.987
lncRNA in canonical Wnt signaling and colorectal cancer	36	64	102	0.5625	-0.02	0.98
Regucalcin in proximal tubule epithelial kidney cells	14	25	68	0.56	-0.03	0.98
Cancer immunotherapy by CTLA4 blockade	5	9	21	0.5556	-0.05	0.934
Classical pathway of steroidogenesis with glucocorticoid and mineralocorticoid metabolism	5	9	73	0.5556	-0.05	0.97
Familial hyperlipidemia type 2	5	9	36	0.5556	-0.05	0.966
Familial hyperlipidemia type 5	5	9	28	0.5556	-0.05	0.976
GDNF/RET signaling axis	5	9	24	0.5556	-0.05	0.964
Heme biosynthesis	5	9	28	0.5556	-0.05	0.971
Mammary gland development pathway - Embryonic development (Stage 1 of 4)	5	9	21	0.5556	-0.05	0.926
Nicotine effect on dopaminergic neurons	5	9	31	0.5556	-0.05	0.964
NOTCH1 regulation of endothelial cell calcification	5	9	18	0.5556	-0.05	0.908
PDGF pathway	19	34	53	0.5588	-0.05	0.956
3q29 copy number variation syndrome	33	59	115	0.5593	-0.06	0.944
TGF-beta signaling pathway	65	116	133	0.5603	-0.07	0.94
Imatinib and chronic myeloid leukemia	10	18	25	0.5556	-0.07	0.939
Vitamin A and carotenoid metabolism	10	18	65	0.5556	-0.07	0.948
Endoplasmic reticulum stress response in coronavirus infection	24	43	57	0.5581	-0.07	0.954
Ciliary landscape	106	189	215	0.5608	-0.07	0.939
miRNA regulation of DNA damage response	38	68	106	0.5588	-0.08	0.936
Cytosolic DNA-sensing pathway	29	52	77	0.5577	-0.08	0.951
Lung fibrosis	20	36	85	0.5556	-0.1	0.928
Mechanoregulation and pathology of YAP/TAZ via Hippo and non-Hippo mechanisms	20	36	47	0.5556	-0.1	0.91
Cardiac hypertrophic response	25	45	61	0.5556	-0.11	0.928
GPCRs, other	25	45	114	0.5556	-0.11	0.913
T-cell antigen receptor (TCR) pathway during Staphylococcus aureus infection	25	45	70	0.5556	-0.11	0.902
Electron transport chain: OXPHOS system in mitochondria	53	95	119	0.5579	-0.11	0.911
Small cell lung cancer	44	79	104	0.557	-0.12	0.897
Galanin receptor pathway	6	11	22	0.5455	-0.12	0.88
Purine metabolism	6	11	94	0.5455	-0.12	0.908
Estrogen signaling pathway	11	20	26	0.55	-0.12	0.919
Alpha 6 beta 4 signaling pathway	16	29	34	0.5517	-0.13	0.888
Initiation of transcription and translation elongation at the HIV-1 LTR	16	29	35	0.5517	-0.13	0.917
MicroRNAs in cardiomyocyte hypertrophy	40	72	109	0.5556	-0.14	0.894
Amyotrophic lateral sclerosis (ALS)	17	31	56	0.5484	-0.17	0.878
DNA mismatch repair	12	22	25	0.5455	-0.17	0.863
Ebstein-Barr virus LMP1 signaling	12	22	25	0.5455	-0.17	0.873
Amino acid metabolism pathway excerpt: histidine catabolism extension	1	2	23	0.5	-0.18	0.854
Butyrate-induced histone acetylation	1	2	11	0.5	-0.18	0.86
Hypoxia-mediated EMT and stemness	1	2	6	0.5	-0.18	0.83
Neurotransmitter disorders	1	2	27	0.5	-0.18	0.856
Nicotine effect on chromaffin cells	1	2	10	0.5	-0.18	0.866
Polyol pathway	1	2	17	0.5	-0.18	0.886
Ultraconserved region 339 modulation of tumor suppressor microRNAs in cancer	1	2	6	0.5	-0.18	0.837
H19 action Rb-E2F1 signaling and CDK-Beta-catenin activity	7	13	17	0.5385	-0.18	0.861
Osteopontin signaling	7	13	14	0.5385	-0.18	0.848
Exercise-induced circadian regulation	23	42	49	0.5476	-0.21	0.841
Mitochondrial complex I assembly model OXPHOS system	28	51	61	0.549	-0.21	0.841
Tryptophan metabolism	13	24	140	0.5417	-0.22	0.837
Glutathione metabolism	8	15	57	0.5333	-0.24	0.815
Serotonin receptor 4/6/7 and NR3C signaling	8	15	22	0.5333	-0.24	0.788
Transcription factor regulation in adipogenesis	8	15	24	0.5333	-0.24	0.787
Cell cycle	59	107	124	0.5514	-0.25	0.795
Glial cell differentiation	2	4	9	0.5	-0.26	0.779
Peroxiredoxin 2 induced ovarian failure	2	4	13	0.5	-0.26	0.809
CAMKK2 pathway	14	26	143	0.5385	-0.26	0.783
Androgen receptor signaling pathway	45	82	90	0.5488	-0.27	0.796
Angiogenesis	9	17	25	0.5294	-0.28	0.773
Kynurenine pathway and links to cell senescence	9	17	56	0.5294	-0.28	0.783
Purine metabolism and related disorders	9	17	139	0.5294	-0.28	0.751
Renin-angiotensin-aldosterone system (RAAS)	15	28	57	0.5357	-0.3	0.763
AMP-activated protein kinase (AMPK) signaling	31	57	78	0.5439	-0.3	0.759
Physico-chemical features and toxicity-associated pathways	26	48	78	0.5417	-0.3	0.759
exRNA mechanism of action and biogenesis	3	6	8	0.5	-0.31	0.741
Gene regulatory network modelling somitogenesis	3	6	13	0.5	-0.31	0.731
Lipid particles composition	3	6	21	0.5	-0.31	0.768
Molybdenum cofactor (Moco) biosynthesis	3	6	21	0.5	-0.31	0.773
SARS-CoV-2 and COVID-19 pathway	3	6	70	0.5	-0.31	0.76
Steroid biosynthesis	3	6	25	0.5	-0.31	0.759
One-carbon metabolism and related pathways	21	39	94	0.5385	-0.32	0.764
Breast cancer pathway	62	113	167	0.5487	-0.32	0.75
1q21.1 copy number variation syndrome	10	19	58	0.5263	-0.33	0.757
Oxidative phosphorylation	32	59	68	0.5424	-0.33	0.731
MECP2 and associated Rett syndrome	27	50	114	0.54	-0.33	0.747
Mesodermal commitment pathway	53	97	154	0.5464	-0.34	0.77
Wnt signaling pathway and pluripotency	38	70	106	0.5429	-0.35	0.747
15q11.2 copy number variation syndrome	4	8	13	0.5	-0.36	0.636
Acquired partial lipodystrophy / Barraquer-Simons syndrome	4	8	17	0.5	-0.36	0.648
Altered glycosylation of MUC1 in tumor microenvironment	4	8	10	0.5	-0.36	0.65
GPCRs, class C metabotropic glutamate, pheromone	4	8	15	0.5	-0.36	0.674
Ketogenesis and ketolysis	4	8	27	0.5	-0.36	0.755
Supression of HMGB1 mediated inflammation by THBD	4	8	10	0.5	-0.36	0.634
Thiamine metabolic pathways	4	8	34	0.5	-0.36	0.736
Mammary gland development pathway - Pregnancy and lactation (Stage 3 of 4)	11	21	42	0.5238	-0.37	0.721
Monoamine transport	11	21	47	0.5238	-0.37	0.707
Cohesin complex - Cornelia de Lange syndrome	17	32	37	0.5313	-0.37	0.704
Vitamin D receptor pathway	60	110	188	0.5455	-0.38	0.704
Neural crest differentiation	29	54	102	0.537	-0.39	0.697
Canonical and non-canonical Notch signaling	12	23	31	0.5217	-0.4	0.699
FGFR3 signaling in chondrocyte proliferation and terminal differentiation	12	23	29	0.5217	-0.4	0.703
Follicle stimulating hormone (FSH) signaling pathway	12	23	28	0.5217	-0.4	0.731
Relationship between inflammation, COX-2 and EGFR	12	23	29	0.5217	-0.4	0.683
Blood clotting cascade	5	10	27	0.5	-0.4	0.686
Disorders of folate metabolism and transport	5	10	46	0.5	-0.4	0.682
FOXP3 in COVID-19	5	10	19	0.5	-0.4	0.65
SMC1/SMC3 role in DNA damage - Cornelia de Lange Syndrome	5	10	12	0.5	-0.4	0.637
Fragile X syndrome	51	94	133	0.5426	-0.41	0.703
Envelope proteins and their potential roles in EDMD physiopathology	19	36	47	0.5278	-0.43	0.672
Airway smooth muscle cell contraction	6	12	25	0.5	-0.44	0.648
Glycosaminoglycan degradation	6	12	45	0.5	-0.44	0.63
Small ligand GPCRs	6	12	25	0.5	-0.44	0.633
Epithelial to mesenchymal transition in colorectal cancer	59	109	163	0.5413	-0.47	0.641
Base excision repair	14	27	32	0.5185	-0.47	0.63
Kisspeptin/kisspeptin receptor system in the ovary	14	27	49	0.5185	-0.47	0.626
MAPK pathway in congenital thyroid cancer	7	14	19	0.5	-0.48	0.63
Fluoropyrimidine activity	15	29	58	0.5172	-0.5	0.608
MAPK cascade	15	29	37	0.5172	-0.5	0.609
NO/cGMP/PKG mediated neuroprotection	15	29	65	0.5172	-0.5	0.615
Vitamin B12 metabolism	15	29	118	0.5172	-0.5	0.638
Pathogenic Escherichia coli infection	22	42	79	0.5238	-0.52	0.617
Focal adhesion: PI3K-Akt-mTOR-signaling pathway	114	209	305	0.5455	-0.53	0.592
Complement and coagulation cascades	16	31	63	0.5161	-0.53	0.577
Overview of leukocyte-intrinsic Hippo pathway functions	16	31	37	0.5161	-0.53	0.603
Regulation of actin cytoskeleton	57	106	160	0.5377	-0.54	0.603
Fatty acid biosynthesis	9	18	43	0.5	-0.54	0.58
IL1 and megakaryocytes in obesity	9	18	26	0.5	-0.54	0.595
PPAR-alpha pathway	9	18	28	0.5	-0.54	0.543
Chromosomal and microsatellite instability in colorectal cancer	35	66	81	0.5303	-0.54	0.601
Gastrin signaling pathway	52	97	115	0.5361	-0.55	0.61
Synaptic vesicle pathway	17	33	59	0.5152	-0.56	0.557
Pathways affected in adenoid cystic carcinoma	30	57	72	0.5263	-0.57	0.568
RAC1/PAK1/p38/MMP2 pathway	30	57	74	0.5263	-0.57	0.564
Hair follicle development: organogenesis - part 2 of 3	10	20	36	0.5	-0.57	0.577
NAD metabolism in oncogene-induced senescence and mitochondrial dysfunction-associated senescence	10	20	46	0.5	-0.57	0.588
Nephrotic syndrome	18	35	49	0.5143	-0.59	0.585
Amino acid metabolism	37	70	205	0.5286	-0.59	0.57
Proteasome degradation	31	59	67	0.5254	-0.59	0.554
DNA damage response	32	61	78	0.5246	-0.61	0.533
Toll-like receptor signaling related to MyD88	14	28	32	0.5	-0.68	0.522
Type 2 papillary renal cell carcinoma	14	28	41	0.5	-0.68	0.537
Aryl hydrocarbon receptor pathway	15	30	49	0.5	-0.7	0.449
G13 signaling pathway	15	30	39	0.5	-0.7	0.47
Arrhythmogenic right ventricular cardiomyopathy	23	45	81	0.5111	-0.71	0.474
Myometrial relaxation and contraction pathways	55	104	161	0.5288	-0.72	0.449
ACE inhibitor pathway	3	7	29	0.4286	-0.72	0.526
Cellular proteostasis	3	7	15	0.4286	-0.72	0.484
DDX1 as a regulatory component of the Drosha microprocessor	3	7	8	0.4286	-0.72	0.592
Drug induction of bile acid pathway	3	7	45	0.4286	-0.72	0.471
EDA signaling in hair follicle development	3	7	15	0.4286	-0.72	0.491
EV release from cardiac cells and their functional effects	3	7	17	0.4286	-0.72	0.519
Farnesoid X receptor pathway	3	7	21	0.4286	-0.72	0.515
Type III interferon signaling	3	7	11	0.4286	-0.72	0.587
ApoE and miR-146 in inflammation and atherosclerosis	4	9	13	0.4444	-0.72	0.539
Familial hyperlipidemia type 3	4	9	24	0.4444	-0.72	0.516
Methionine metabolism leading to sulfur amino acids and related disorders	4	9	46	0.4444	-0.72	0.48
Non-homologous end joining	4	9	11	0.4444	-0.72	0.517
Vitamin B12 disorders	4	9	36	0.4444	-0.72	0.471
Chemokine signaling pathway	67	126	172	0.5317	-0.72	0.442
Complement activation	5	11	24	0.4545	-0.73	0.446
Dopaminergic neurogenesis	5	11	32	0.4545	-0.73	0.473
Caloric restriction and aging	2	5	13	0.4	-0.74	0.426
Folate-alcohol and cancer pathway hypotheses	2	5	24	0.4	-0.74	0.455
Gamma-glutamyl cycle for the biosynthesis and degradation of glutathione, including diseases	2	5	24	0.4	-0.74	0.47
HIF1A and PPARG regulation of glycolysis	2	5	19	0.4	-0.74	0.434
Irinotecan pathway	2	5	18	0.4	-0.74	0.456
TCA cycle nutrient use and invasiveness of ovarian cancer	2	5	11	0.4	-0.74	0.479
Familial hyperlipidemia type 4	6	13	36	0.4615	-0.74	0.488
GABA receptor signaling	6	13	57	0.4615	-0.74	0.443
Mitochondrial gene expression	6	13	23	0.4615	-0.74	0.416
MYD88 distinct input-output pathway	6	13	20	0.4615	-0.74	0.43
TCA cycle and deficiency of pyruvate dehydrogenase complex (PDHc)	6	13	37	0.4615	-0.74	0.485
IL-9 signaling pathway	7	15	18	0.4667	-0.76	0.42
Type II diabetes mellitus	7	15	28	0.4667	-0.76	0.415
ErbB signaling pathway	39	75	101	0.52	-0.76	0.451
Netrin-UNC5B signaling pathway	18	36	53	0.5	-0.77	0.462
Inflammatory response pathway	8	17	34	0.4706	-0.77	0.45
Oligodendrocyte specification and differentiation, leading to myelin components for CNS	8	17	46	0.4706	-0.77	0.461
Transcription co-factors SKI and SKIL protein partners	8	17	19	0.4706	-0.77	0.411
7q11.23 copy number variation syndrome	46	88	149	0.5227	-0.77	0.461
Modulators of TCR signaling and T cell activation	26	51	66	0.5098	-0.77	0.444
mBDNF and proBDNF regulation of GABA neurotransmission	9	19	40	0.4737	-0.79	0.422
GABA metabolism (aka GHB)	1	3	42	0.3333	-0.8	0.438
Glycine metabolism	1	3	19	0.3333	-0.8	0.415
MED and pseudoachondroplasia genes	1	3	7	0.3333	-0.8	0.394
Somitogenesis in the context of spondylocostal dysostosis	1	3	10	0.3333	-0.8	0.4
Vitamin B6-dependent and responsive disorders	1	3	29	0.3333	-0.8	0.417
Ebola virus pathway in host	60	114	141	0.5263	-0.8	0.418
Matrix metalloproteinases	10	21	31	0.4762	-0.81	0.396
Aryl hydrocarbon receptor Netpath	21	42	57	0.5	-0.83	0.45
Glioblastoma signaling pathways	36	70	88	0.5143	-0.83	0.405
Common pathways underlying drug addiction	12	25	50	0.48	-0.84	0.429
Development of ureteric collection system	12	25	63	0.48	-0.84	0.4
Familial partial lipodystrophy (FPLD)	13	27	44	0.4815	-0.86	0.347
Glycerophospholipid biosynthetic pathway	13	27	107	0.4815	-0.86	0.369
Alzheimer's disease	111	208	288	0.5337	-0.88	0.384
Tumor suppressor activity of SMARCB1	14	29	35	0.4828	-0.88	0.367
16p11.2 proximal deletion syndrome	34	67	152	0.5075	-0.93	0.36
Leptin signaling pathway	34	67	77	0.5075	-0.93	0.358
Alzheimer's disease and miRNA effects	111	209	358	0.5311	-0.95	0.339
Genes related to primary cilium development (based on CRISPR)	45	88	104	0.5114	-0.99	0.327
Synaptic signaling pathways associated with autism spectrum disorder	21	43	55	0.4884	-0.99	0.353
Non-small cell lung cancer	31	62	88	0.5	-1.01	0.3
Cancer immunotherapy by PD-1 blockade	7	16	35	0.4375	-1.02	0.327
Overview of interferons-mediated signaling pathway	7	16	38	0.4375	-1.02	0.326
Biomarkers for pyrimidine metabolism disorders	6	14	88	0.4286	-1.02	0.299
Cysteine and methionine catabolism	6	14	74	0.4286	-1.02	0.332
MAP3K1 role in promoting and blocking gonadal determination	6	14	18	0.4286	-1.02	0.374
Mitochondrial long chain fatty acid beta-oxidation	6	14	24	0.4286	-1.02	0.319
15q13.3 copy number variation syndrome	8	18	40	0.4444	-1.02	0.315
Inhibition of exosome biogenesis and secretion by Manumycin A in CRPC cells	8	18	19	0.4444	-1.02	0.347
TP53 network	8	18	23	0.4444	-1.02	0.337
Urea cycle and associated pathways	8	18	81	0.4444	-1.02	0.295
Wnt/beta-catenin signaling pathway in leukemia	8	18	29	0.4444	-1.02	0.334
PI3K-Akt signaling pathway	116	219	359	0.5297	-1.02	0.292
Adipogenesis	47	92	132	0.5109	-1.02	0.304
Disruption of postsynaptic signaling by CNV	9	20	35	0.45	-1.02	0.303
Statin inhibition of cholesterol production	9	20	50	0.45	-1.02	0.297
Homologous recombination	5	12	14	0.4167	-1.03	0.357
T-cell activation SARS-CoV-2	32	64	98	0.5	-1.03	0.323
IL-7 signaling pathway	10	22	26	0.4545	-1.03	0.279
Overlap between signal transduction pathways contributing to LMNA laminopathies	24	49	73	0.4898	-1.04	0.298
Hedgehog signaling pathway Netpath	4	10	17	0.4	-1.04	0.33
lncRNA-mediated mechanisms of therapeutic resistance	4	10	14	0.4	-1.04	0.407
SRF and miRs in smooth muscle differentiation and proliferation	4	10	18	0.4	-1.04	0.337
TCA cycle in senescence	4	10	30	0.4	-1.04	0.283
Trans-sulfuration pathway	4	10	25	0.4	-1.04	0.27
Phosphodiesterases in neuronal function	12	26	66	0.4615	-1.05	0.282
Alanine and aspartate metabolism	3	8	66	0.375	-1.08	0.291
BMP2-WNT4-FOXO1 pathway in primary endometrial stromal cell differentiation	3	8	16	0.375	-1.08	0.236
Bone morphogenic protein (BMP) signaling and regulation	3	8	13	0.375	-1.08	0.253
Dual hijack model of Vif in HIV infection	3	8	10	0.375	-1.08	0.306
Hijack of ubiquitination by SARS-CoV-2	3	8	12	0.375	-1.08	0.305
Interleukin-1 induced activation of NF-kB	3	8	13	0.375	-1.08	0.274
Leptin and adiponectin	3	8	14	0.375	-1.08	0.265
Mitochondrial complex II assembly	3	8	10	0.375	-1.08	0.284
Thermogenesis	43	85	140	0.5059	-1.08	0.287
Influence of laminopathies on Wnt signaling	15	32	45	0.4688	-1.08	0.258
Mitochondrial complex IV assembly	15	32	40	0.4688	-1.08	0.272
Bladder cancer	17	36	47	0.4722	-1.11	0.268
Proximal tubule transport	17	36	86	0.4722	-1.11	0.257
Microtubule cytoskeleton regulation	18	38	47	0.4737	-1.12	0.266
Prader-Willi and Angelman syndrome	18	38	90	0.4737	-1.12	0.276
Aripiprazole metabolic pathway	0	1	7	0	-1.14	0.324
Caffeine and theobromine metabolism	0	1	18	0	-1.14	0.242
Diclofenac metabolic pathway	0	1	12	0	-1.14	0.272
Hypothetical craniofacial development pathway	0	1	11	0	-1.14	0.291
Nicotine metabolism in liver cells	0	1	18	0	-1.14	0.245
Soluble ACE2-mediated cell entry of SARS-CoV-2	0	1	7	0	-1.14	0.291
Acetylcholine synthesis	2	6	18	0.3333	-1.14	0.204
Alternative pathway of fetal androgen synthesis	2	6	48	0.3333	-1.14	0.242
FTO obesity variant mechanism	2	6	11	0.3333	-1.14	0.224
Krebs cycle disorders	2	6	34	0.3333	-1.14	0.272
Mitochondrial fatty acid synthesis pathway	2	6	21	0.3333	-1.14	0.213
DNA IR-double strand breaks and cellular response via ATM	26	54	65	0.4815	-1.22	0.238
7-oxo-C and 7-beta-HC pathways	10	23	60	0.4348	-1.25	0.241
Endothelin pathways	10	23	48	0.4348	-1.25	0.217
Intraflagellar transport proteins binding to dynein	10	23	28	0.4348	-1.25	0.233
Cannabinoid receptor signaling	9	21	54	0.4286	-1.25	0.211
Heart development	9	21	48	0.4286	-1.25	0.206
Nuclear receptors in lipid metabolism and toxicity	9	21	48	0.4286	-1.25	0.173
RAS and bradykinin pathways in COVID-19	8	19	51	0.4211	-1.25	0.186
Pancreatic adenocarcinoma pathway	39	79	97	0.4937	-1.26	0.209
Glycolysis and gluconeogenesis	14	31	69	0.4516	-1.26	0.218
Pregnane X receptor pathway	7	17	35	0.4118	-1.26	0.198
TCA cycle (aka Krebs or citric acid cycle)	7	17	49	0.4118	-1.26	0.193
Triacylglyceride synthesis	7	17	37	0.4118	-1.26	0.198
Eicosanoid metabolism via cytochrome P450 monooxygenases (CYP) pathway	1	4	23	0.25	-1.26	0.208
let-7 inhibition of ES cell reprogramming	1	4	17	0.25	-1.26	0.221
Cell differentiation - index	5	13	61	0.3846	-1.3	0.208
Pyrimidine metabolism and related diseases	5	13	97	0.3846	-1.3	0.187
Development of pulmonary dendritic cells and macrophage subsets	4	11	14	0.3636	-1.34	0.153
Glycolysis in senescence	4	11	26	0.3636	-1.34	0.168
GPCRs, class B secretin-like	4	11	24	0.3636	-1.34	0.172
Nitric oxide metabolism in cystic fibrosis	4	11	25	0.3636	-1.34	0.173
OSX and miRNAs in tooth development	4	11	39	0.3636	-1.34	0.167
Pathogenesis of SARS-CoV-2 mediated by nsp9-nsp10 complex	4	11	34	0.3636	-1.34	0.151
Aerobic glycolysis	3	9	35	0.3333	-1.39	0.145
Biotin metabolism, including IEMs	3	9	38	0.3333	-1.39	0.181
Mammary gland development pathway - Involution (Stage 4 of 4)	3	9	13	0.3333	-1.39	0.177
Glycogen synthesis and degradation	14	32	54	0.4375	-1.44	0.142
Metabolic reprogramming in colon cancer	15	34	80	0.4412	-1.44	0.154
Rett syndrome causing genes	16	36	60	0.4444	-1.44	0.155
Cell migration and invasion through p75NTR	9	22	31	0.4091	-1.46	0.146
Striated muscle contraction pathway	8	20	39	0.4	-1.48	0.141
Bile acids synthesis and enterohepatic circulation	2	7	18	0.2857	-1.48	0.132
Cerebral organic acidurias, including diseases	2	7	46	0.2857	-1.48	0.131
Liver X receptor pathway	2	7	12	0.2857	-1.48	0.144
Endometrial cancer	25	54	77	0.463	-1.49	0.118
Hippo-Merlin signaling dysregulation	40	83	121	0.4819	-1.5	0.147
Cell differentiation - expanded index	6	16	69	0.375	-1.52	0.138
G protein signaling pathways	32	68	97	0.4706	-1.55	0.116
Gastric acid production	0	2	22	0	-1.61	0.117
Heroin metabolism	0	2	8	0	-1.61	0.102
Secretion of hydrochloric acid in parietal cells	0	2	15	0	-1.61	0.107
Tamoxifen metabolism	0	2	37	0	-1.61	0.117
Neural crest cell migration in cancer	13	31	43	0.4194	-1.62	0.111
Neural crest cell migration during development	12	29	40	0.4138	-1.63	0.107
Arachidonate epoxygenase / epoxide hydrolase	1	5	18	0.2	-1.64	0.114
Codeine and morphine metabolism	1	5	25	0.2	-1.64	0.113
Effects of nitric oxide	1	5	16	0.2	-1.64	0.083
Fluoroacetic acid toxicity	1	5	16	0.2	-1.64	0.082
Kinin-Kallikrein pathway	1	5	10	0.2	-1.64	0.107
Phase I biotransformations, non P450	1	5	13	0.2	-1.64	0.098
Interactions of natural killer cells in pancreatic cancer	10	25	43	0.4	-1.65	0.116
Oxidation by cytochrome P450	10	25	75	0.4	-1.65	0.096
Complement system	30	65	143	0.4615	-1.66	0.099
Estrogen receptor pathway	3	10	16	0.3	-1.68	0.096
Mammary gland development pathway - Puberty (Stage 2 of 4)	3	10	15	0.3	-1.68	0.116
Spinal cord injury	36	77	127	0.4675	-1.7	0.09
Melanoma	26	58	78	0.4483	-1.77	0.066
Dopamine metabolism	2	8	48	0.25	-1.79	0.086
PI3K/AKT/mTOR - VitD3 signaling	5	15	34	0.3333	-1.8	0.073
22q11.2 copy number variation syndrome	49	103	225	0.4757	-1.81	0.069
Thyroid hormones production and peripheral downstream signaling effects	34	74	134	0.4595	-1.81	0.072
Oxysterols derived from cholesterol	11	28	112	0.3929	-1.82	0.057
Melatonin metabolism and effects	10	26	64	0.3846	-1.84	0.059
Prion disease pathway	10	26	36	0.3846	-1.84	0.061
Regulation of apoptosis by parathyroid hormone-related protein	7	20	24	0.35	-1.93	0.045
Cytoplasmic ribosomal proteins	35	77	89	0.4545	-1.94	0.057
Biogenic amine synthesis	1	6	33	0.1667	-1.96	0.046
Degradation pathway of sphingolipids, including diseases	1	6	41	0.1667	-1.96	0.039
Metastatic brain tumor	1	6	28	0.1667	-1.96	0.045
Fatty acid omega-oxidation	0	3	20	0	-1.97	0.053
Thyroxine (thyroid hormone) production	0	3	12	0	-1.97	0.052
Ciliopathies	65	136	184	0.4779	-2.03	0.04
Hippo signaling regulation pathways	30	68	104	0.4412	-2.04	0.042
Energy metabolism	16	40	49	0.4	-2.09	0.047
Hedgehog signaling pathway	11	30	44	0.3667	-2.18	0.029
Wnt signaling pathway	17	43	52	0.3953	-2.23	0.028
Pyrimidine metabolism	33	76	140	0.4342	-2.28	0.021
Photodynamic therapy-induced HIF-1 survival signaling	11	31	38	0.3548	-2.35	0.017
Translation factors	18	47	51	0.383	-2.5	0.01
nsp1 from SARS-CoV-2 inhibits translation initiation in the host cell	3	14	21	0.2143	-2.64	0.007
Lipid metabolism pathway	7	24	43	0.2917	-2.69	0.007
Congenital generalized lipodystrophy (CGL)	4	17	31	0.2353	-2.73	0.01
mRNA processing	52	119	130	0.437	-2.8	0.005
ATR signaling	0	7	10	0	-3.01	0
Constitutive androstane receptor pathway	3	17	34	0.1765	-3.22	0.001
Acrylamide biotransformation and exposure biomarkers	0	0	10	NaN%	NaN	0
Amino acid conjugation of benzoic acid	0	0	15	NaN%	NaN	0
Amino acid conjugation	0	0	7	NaN%	NaN	0
Biochemical pathways: part I	0	0	471	NaN%	NaN	0
Blood clotting and drug effects	0	0	13	NaN%	NaN	0
Colchicine metabolic pathway	0	0	5	NaN%	NaN	0
Felbamate metabolism	0	0	12	NaN%	NaN	0
Glucose homeostasis	0	0	24	NaN%	NaN	0
Lidocaine metabolism	0	0	11	NaN%	NaN	0
Liver steatosis adverse outcome pathway	0	0	46	NaN%	NaN	0
Metabolism of dichloroethylene by CYP450	0	0	13	NaN%	NaN	0
Metabolism of tetrahydrocannabinol (THC)	0	0	11	NaN%	NaN	0
Metabolism overview	0	0	116	NaN%	NaN	0
Meta pathway lipodystrophy, dyslipidemia and hyperlipidemia	0	0	13	NaN%	NaN	0
Mitochondrial complex I inhibition leading to chemical-induced Fanconi syndrome	0	0	21	NaN%	NaN	0
Modified nucleosides derived from tRNA as urinary cancer markers	0	0	21	NaN%	NaN	0
Ophthalmate biosynthesis in hepatocytes	0	0	10	NaN%	NaN	0
Phosphatidylcholine catabolism	0	0	32	NaN%	NaN	0
Role of carnosine in muscle contraction	0	0	14	NaN%	NaN	0

## Sheet: THP1_RIVM1_adjPvalue020
Statistics results for Fri Dec 10 17:40:48 CET 2021
Dataset: J:\FHML_TGX\Danyel.Jennen\ProjectFolder\Projects\Filler-project\THP1_RIVM\pathvisio\noflags\THP1_RIVM_BioAlcamid_limma_OUTPUT_TABLE.pgex
Pathway directory: D:\wikipathways-20211110-gpml-Homo_sapiens
Gene database: D:\pathvisio-3.3.0\Hs_Derby_Ensembl_91.bridge
Criterion: [RIVM1_adj.P.Val] < 0.2
Calculation method: pathway-centric. Calculations are performed after mapping data to pathways.
Total data points (N): 8416
Data points meeting criterion (R): 745
Pathway	positive (r)	measured (n)	total	%	Z Score	p-value (permuted)
G1 to S cell cycle control	16	59	68	0.2712	4.96	0
DNA replication	11	38	50	0.2895	4.37	0
MFAP5-mediated ovarian cancer cell motility and invasiveness	4	9	18	0.4444	3.76	0.003
Hepatitis C and hepatocellular carcinoma	11	46	63	0.2391	3.61	0.001
Retinoblastoma gene in cancer	16	81	98	0.1975	3.47	0.001
Antiviral and anti-inflammatory effects of Nrf2 on SARS-CoV-2 pathway	7	25	50	0.28	3.38	0.005
Hormonal control of pubertal growth spurt	1	1	8	1	3.21	0.002
Matrix metalloproteinases	6	21	31	0.2857	3.19	0.005
3q29 copy number variation syndrome	12	59	115	0.2034	3.12	0.002
Airway smooth muscle cell contraction	4	12	25	0.3333	2.99	0.011
ID signaling pathway	4	12	17	0.3333	2.99	0.01
Translation inhibitors in chronically activated PDGFRA cells	9	41	49	0.2195	2.96	0.007
Cell cycle	18	107	124	0.1682	2.92	0.004
MFAP5 effect on permeability and motility of endothelial cells via cytoskeleton rearrangement	4	14	20	0.2857	2.6	0.014
VEGFA-VEGFR2 signaling pathway	45	361	436	0.1247	2.47	0.011
Transcriptional activation by NRF2 in response to phytochemicals	4	15	20	0.2667	2.43	0.014
Cells and molecules involved in local acute inflammatory response	3	10	19	0.3	2.36	0.029
Burn wound healing	12	72	124	0.1667	2.34	0.017
Pathways affected in adenoid cystic carcinoma	10	57	72	0.1754	2.32	0.021
Wnt signaling	13	81	121	0.1605	2.29	0.03
Initiation of transcription and translation elongation at the HIV-1 LTR	6	29	35	0.2069	2.25	0.027
Androgen receptor signaling pathway	13	82	90	0.1585	2.24	0.022
Senescence and autophagy in cancer	14	92	112	0.1522	2.16	0.032
Fatty acid transporters	3	11	28	0.2727	2.15	0.018
Insulin signaling in adipocytes (diabetic condition)	2	6	12	0.3333	2.11	0.042
Insulin signaling in adipocytes (normal condition)	2	6	15	0.3333	2.11	0.041
Oncostatin M signaling pathway	10	61	66	0.1639	2.08	0.028
Amino acid metabolism pathway excerpt: histidine catabolism extension	1	2	23	0.5	2.05	0.047
Hypoxia-mediated EMT and stemness	1	2	6	0.5	2.05	0.041
Tyrosine metabolism	1	2	27	0.5	2.05	0.031
Ultraconserved region 339 modulation of tumor suppressor microRNAs in cancer	1	2	6	0.5	2.05	0.029
Glioblastoma signaling pathways	11	70	88	0.1571	2.03	0.043
Hematopoietic stem cell gene regulation by GABP alpha/beta complex	4	18	26	0.2222	2	0.029
DNA IR-damage and cellular response via ATR	11	72	90	0.1528	1.93	0.05
Ectoderm differentiation	14	99	145	0.1414	1.86	0.064
Interferon type I signaling pathways	8	49	57	0.1633	1.85	0.043
COVID-19 adverse outcome pathway	2	7	24	0.2857	1.84	0.046
DDX1 as a regulatory component of the Drosha microprocessor	2	7	8	0.2857	1.84	0.07
TNF-alpha signaling pathway	12	83	97	0.1446	1.81	0.081
ErbB signaling pathway	11	75	101	0.1467	1.78	0.069
Brain-derived neurotrophic factor (BDNF) signaling pathway	15	110	150	0.1364	1.78	0.072
Hair follicle development: organogenesis - part 2 of 3	4	20	36	0.2	1.76	0.065
Fragile X syndrome	13	94	133	0.1383	1.71	0.094
Integrin-mediated cell adhesion	12	86	102	0.1395	1.67	0.088
Envelope proteins and their potential roles in EDMD physiopathology	6	36	47	0.1667	1.65	0.077
Pluripotent stem cell differentiation pathway	4	21	64	0.1905	1.65	0.092
IL-18 signaling pathway	26	217	288	0.1198	1.64	0.093
AGE/RAGE pathway	9	61	67	0.1475	1.63	0.097
Focal adhesion	19	152	201	0.125	1.6	0.126
Factors and pathways affecting insulin-like growth factor (IGF1)-Akt signaling	5	29	43	0.1724	1.59	0.066
PPAR signaling pathway	7	45	76	0.1556	1.59	0.115
Notch signaling	6	37	48	0.1622	1.58	0.102
Phosphoinositides metabolism	6	37	89	0.1622	1.58	0.093
Prostaglandin and leukotriene metabolism in senescence	4	22	57	0.1818	1.54	0.129
Malignant pleural mesothelioma	35	310	468	0.1129	1.54	0.135
ATM signaling pathway	6	38	50	0.1579	1.51	0.117
Genes controlling nephrogenesis	4	23	45	0.1739	1.44	0.138
NRF2-ARE regulation	4	23	24	0.1739	1.44	0.087
Head and neck squamous cell carcinoma	9	65	81	0.1385	1.42	0.154
GDNF/RET signaling axis	2	9	24	0.2222	1.41	0.095
NAD metabolism, sirtuins and aging	2	9	16	0.2222	1.41	0.104
Cancer immunotherapy by PD-1 blockade	3	16	35	0.1875	1.4	0.115
Thyroid stimulating hormone (TSH) signaling pathway	8	57	67	0.1404	1.38	0.152
Ciliary landscape	22	189	215	0.1164	1.36	0.18
Oxidative stress response	4	24	35	0.1667	1.35	0.132
Thermogenesis	11	85	140	0.1294	1.33	0.177
Ferroptosis	6	41	88	0.1463	1.31	0.195
Notch signaling pathway (Netpath)	7	50	62	0.14	1.29	0.177
Cytoplasmic ribosomal proteins	10	77	89	0.1299	1.28	0.224
Congenital generalized lipodystrophy (CGL)	3	17	31	0.1765	1.28	0.157
Oxidative phosphorylation	8	59	68	0.1356	1.28	0.167
Calcium regulation in cardiac cells	12	96	167	0.125	1.27	0.229
Fatty acid beta-oxidation	4	25	71	0.16	1.26	0.198
Integrated cancer pathway	6	42	50	0.1429	1.24	0.226
ERK pathway in Huntington's disease	2	10	17	0.2	1.24	0.098
Estrogen receptor pathway	2	10	16	0.2	1.24	0.109
FOXP3 in COVID-19	2	10	19	0.2	1.24	0.115
GPR40 pathway	2	10	20	0.2	1.24	0.113
Hedgehog signaling pathway Netpath	2	10	17	0.2	1.24	0.108
lncRNA-mediated mechanisms of therapeutic resistance	2	10	14	0.2	1.24	0.103
SMC1/SMC3 role in DNA damage - Cornelia de Lange Syndrome	2	10	12	0.2	1.24	0.096
Primary focal segmental glomerulosclerosis (FSGS)	8	60	77	0.1333	1.23	0.224
7q11.23 copy number variation syndrome	11	88	149	0.125	1.21	0.225
EGFR tyrosine kinase inhibitor resistance	9	70	92	0.1286	1.18	0.204
Wnt signaling pathway	6	43	52	0.1395	1.18	0.228
Phosphodiesterases in neuronal function	4	26	66	0.1538	1.17	0.219
4-hydroxytamoxifen, Dexamethasone, and Retinoic Acids Regulation of p27 Expression	3	18	31	0.1667	1.17	0.26
Imatinib and chronic myeloid leukemia	3	18	25	0.1667	1.17	0.161
Orexin receptor pathway	12	99	225	0.1212	1.15	0.258
Benzene metabolism	1	4	17	0.25	1.14	0.14
Glial cell differentiation	1	4	9	0.25	1.14	0.098
Metabolism of alpha-linolenic acid	1	4	27	0.25	1.14	0.209
Peroxiredoxin 2 induced ovarian failure	1	4	13	0.25	1.14	0.1
Peroxisomal beta-oxidation of tetracosanoyl-CoA	1	4	17	0.25	1.14	0.134
SCFA and skeletal muscle substrate metabolism	1	4	17	0.25	1.14	0.13
Sulindac metabolic pathway	1	4	11	0.25	1.14	0.115
Tgif disruption of Shh signaling	1	4	10	0.25	1.14	0.099
BDNF-TrkB signaling	4	27	38	0.1481	1.09	0.307
Photodynamic therapy-induced NF-kB survival signaling	4	27	36	0.1481	1.09	0.342
Pathogenesis of SARS-CoV-2 mediated by nsp9-nsp10 complex	2	11	34	0.1818	1.09	0.349
MAPK signaling pathway	20	180	258	0.1111	1.08	0.283
Neural crest differentiation	7	54	102	0.1296	1.07	0.283
Cardiac hypertrophic response	6	45	61	0.1333	1.06	0.294
TGF-beta receptor signaling in skeletal dysplasias	6	45	60	0.1333	1.06	0.293
Estrogen signaling pathway	3	20	26	0.15	0.97	0.452
Nanoparticle triggered autophagic cell death	3	20	30	0.15	0.97	0.405
Physiological and pathological hypertrophy of the heart	3	20	27	0.15	0.97	0.423
EGF/EGFR signaling pathway	16	144	163	0.1111	0.96	0.344
BMP signaling in eyelid development	2	12	23	0.1667	0.95	0.41
Homologous recombination	2	12	14	0.1667	0.95	0.175
ncRNAs involved in STAT3 signaling in hepatocellular carcinoma	2	12	19	0.1667	0.95	0.319
Omega-3 / omega-6 fatty acid synthesis	2	12	53	0.1667	0.95	0.323
Translation factors	6	47	51	0.1277	0.95	0.329
DNA damage response (only ATM dependent)	11	95	118	0.1158	0.94	0.329
Fluoropyrimidine activity	4	29	58	0.1379	0.94	0.331
Fas ligand pathway and stress induction of heat shock proteins	5	38	48	0.1316	0.94	0.342
Microtubule cytoskeleton regulation	5	38	47	0.1316	0.94	0.344
Prader-Willi and Angelman syndrome	5	38	90	0.1316	0.94	0.355
Network map of SARS-CoV-2 signaling pathway	17	155	324	0.1097	0.94	0.343
AMP-activated protein kinase (AMPK) signaling	7	57	78	0.1228	0.91	0.364
TGF-beta signaling pathway	13	116	133	0.1121	0.9	0.369
16p11.2 proximal deletion syndrome	8	67	152	0.1194	0.89	0.377
Spinal cord injury	9	77	127	0.1169	0.88	0.388
Cell-type dependent selectivity of CCK2R signaling	1	5	26	0.2	0.88	0.473
Hfe effect on hepcidin production	1	5	8	0.2	0.88	0.205
HIF1A and PPARG regulation of glycolysis	1	5	19	0.2	0.88	0.478
miR-517 relationship with ARCN1 and USP1	1	5	7	0.2	0.88	0.206
Osteoblast signaling	1	5	18	0.2	0.88	0.463
Ethanol effects on histone modifications	3	21	53	0.1429	0.88	0.371
Monoamine transport	3	21	47	0.1429	0.88	0.35
S1P receptor signal transduction	3	21	26	0.1429	0.88	0.513
Vitamin D in inflammatory diseases	3	21	25	0.1429	0.88	0.505
Integrated breast cancer pathway	16	147	200	0.1088	0.88	0.384
TNF-related weak inducer of apoptosis (TWEAK) signaling pathway	5	39	45	0.1282	0.87	0.389
G13 signaling pathway	4	30	39	0.1333	0.87	0.344
Hedgehog signaling pathway	4	30	44	0.1333	0.87	0.371
Hepatocyte growth factor receptor signaling	4	30	35	0.1333	0.87	0.399
G protein signaling pathways	8	68	97	0.1176	0.85	0.376
Globo sphingolipid metabolism	2	13	28	0.1538	0.83	0.49
Interactions between LOXL4 and oxidative stress pathway	2	13	19	0.1538	0.83	0.513
MYD88 distinct input-output pathway	2	13	20	0.1538	0.83	0.498
NAD+ metabolism	2	13	34	0.1538	0.83	0.458
Pyrimidine metabolism and related diseases	2	13	97	0.1538	0.83	0.398
Regulatory circuits of the STAT3 signaling pathway	7	59	79	0.1186	0.82	0.425
Small cell lung cancer	9	79	104	0.1139	0.8	0.404
Male infertility	10	89	150	0.1124	0.8	0.413
Amyotrophic lateral sclerosis (ALS)	4	31	56	0.129	0.8	0.456
Neural crest cell migration in cancer	4	31	43	0.129	0.8	0.391
Oxidative damage response	4	31	44	0.129	0.8	0.411
Cell migration and invasion through p75NTR	3	22	31	0.1364	0.79	0.452
DNA mismatch repair	3	22	25	0.1364	0.79	0.542
Photodynamic therapy-induced NFE2L2 (NRF2) survival signaling	3	22	24	0.1364	0.79	0.542
Prostaglandin signaling	3	22	40	0.1364	0.79	0.382
Angiopoietin-like protein 8 regulatory pathway	12	110	157	0.1091	0.76	0.476
Modulators of TCR signaling and T cell activation	6	51	66	0.1176	0.73	0.465
TYROBP causal network in microglia	6	51	61	0.1176	0.73	0.49
Cohesin complex - Cornelia de Lange syndrome	4	32	37	0.125	0.73	0.403
Pre-implantation embryo	4	32	60	0.125	0.73	0.474
DNA damage response	7	61	78	0.1148	0.72	0.458
Biomarkers for pyrimidine metabolism disorders	2	14	88	0.1429	0.72	0.479
Kallmann syndrome	2	14	40	0.1429	0.72	0.424
Metabolism of spingolipids in ER and Golgi apparatus	2	14	72	0.1429	0.72	0.468
Mitochondrial long chain fatty acid beta-oxidation	2	14	24	0.1429	0.72	0.554
nsp1 from SARS-CoV-2 inhibits translation initiation in the host cell	2	14	21	0.1429	0.72	0.611
Regulation of sister chromatid separation at the metaphase-anaphase transition	2	14	16	0.1429	0.72	0.622
TGF-beta signaling in thyroid cells for epithelial-mesenchymal transition	2	14	20	0.1429	0.72	0.621
Canonical and non-canonical Notch signaling	3	23	31	0.1304	0.71	0.503
Follicle stimulating hormone (FSH) signaling pathway	3	23	28	0.1304	0.71	0.578
Relationship between inflammation, COX-2 and EGFR	3	23	29	0.1304	0.71	0.554
Pathogenic Escherichia coli infection	5	42	79	0.119	0.7	0.469
TGF-beta receptor signaling	5	42	56	0.119	0.7	0.519
B cell receptor signaling pathway	9	82	99	0.1098	0.68	0.512
Non-small cell lung cancer	7	62	88	0.1129	0.68	0.5
Apoptosis	8	72	88	0.1111	0.68	0.515
MicroRNAs in cardiomyocyte hypertrophy	8	72	109	0.1111	0.68	0.504
Acetylcholine synthesis	1	6	18	0.1667	0.67	0.641
Estrogen metabolism	1	6	45	0.1667	0.67	0.526
exRNA mechanism of action and biogenesis	1	6	8	0.1667	0.67	0.442
Metastatic brain tumor	1	6	28	0.1667	0.67	0.536
MicroRNA for targeting cancer growth and vascularization in glioblastoma	1	6	10	0.1667	0.67	0.567
Mitochondrial fatty acid synthesis pathway	1	6	21	0.1667	0.67	0.616
Pilocytic astrocytoma	1	6	14	0.1667	0.67	0.675
Serine metabolism	1	6	43	0.1667	0.67	0.473
Breast cancer pathway	12	113	167	0.1062	0.67	0.508
Synaptic vesicle pathway	4	33	59	0.1212	0.66	0.538
Interleukin-1 (IL-1) structural pathway	5	43	52	0.1163	0.64	0.558
Synaptic signaling pathways associated with autism spectrum disorder	5	43	55	0.1163	0.64	0.552
Selenium micronutrient network	6	53	198	0.1132	0.63	0.524
PI3K-Akt signaling pathway	22	219	359	0.1005	0.63	0.54
Glutathione metabolism	2	15	57	0.1333	0.61	0.547
lncRNA in canonical Wnt signaling and colorectal cancer	7	64	102	0.1094	0.59	0.566
DNA IR-double strand breaks and cellular response via ATM	6	54	65	0.1111	0.59	0.554
Regulation of actin cytoskeleton	11	106	160	0.1038	0.56	0.572
Gastric cancer network 1	3	25	30	0.12	0.55	0.576
Gastric cancer network 2	3	25	33	0.12	0.55	0.517
NRF2 pathway	10	96	145	0.1042	0.54	0.556
IL-5 signaling pathway	4	35	41	0.1143	0.54	0.63
Target of rapamycin (TOR) signaling	4	35	40	0.1143	0.54	0.585
Toll-like receptor signaling pathway	8	76	117	0.1053	0.52	0.624
Hypertrophy model	2	16	21	0.125	0.51	0.649
Ovarian infertility	2	16	33	0.125	0.51	0.555
Gastrin signaling pathway	10	97	115	0.1031	0.51	0.605
Mesodermal commitment pathway	10	97	154	0.1031	0.51	0.601
ATR signaling	1	7	10	0.1429	0.51	0.883
Cellular proteostasis	1	7	15	0.1429	0.51	0.759
EV release from cardiac cells and their functional effects	1	7	17	0.1429	0.51	0.72
NIPBL role in DNA damage - Cornelia de Lange syndrome	1	7	9	0.1429	0.51	0.878
Serotonin transporter activity	1	7	15	0.1429	0.51	0.758
Non-genomic actions of 1,25 dihydroxyvitamin D3	6	56	97	0.1071	0.49	0.6
RANKL/RANK signaling pathway	5	46	58	0.1087	0.48	0.601
Melatonin metabolism and effects	3	26	64	0.1154	0.48	0.613
Prion disease pathway	3	26	36	0.1154	0.48	0.644
Resistin as a regulator of inflammation	3	26	34	0.1154	0.48	0.654
Mechanoregulation and pathology of YAP/TAZ via Hippo and non-Hippo mechanisms	4	36	47	0.1111	0.48	0.671
Netrin-UNC5B signaling pathway	4	36	53	0.1111	0.48	0.644
Rett syndrome causing genes	4	36	60	0.1111	0.48	0.62
Hair follicle development: cytodifferentiation - part 3 of 3	5	47	93	0.1064	0.43	0.681
Vitamin D receptor pathway	11	110	188	0.1	0.43	0.644
Angiogenesis	2	17	25	0.1176	0.42	0.632
Eicosanoid metabolism via lipooxygenases (LOX)	2	17	70	0.1176	0.42	0.673
Eicosanoid synthesis	2	17	57	0.1176	0.42	0.64
Inflammatory response pathway	2	17	34	0.1176	0.42	0.669
Methionine de novo and salvage pathway	2	17	74	0.1176	0.42	0.661
Nanomaterial induced apoptosis	2	17	31	0.1176	0.42	0.654
TCA cycle (aka Krebs or citric acid cycle)	2	17	49	0.1176	0.42	0.684
IL-2 signaling pathway	4	37	43	0.1081	0.42	0.721
miRNA regulation of DNA damage response	7	68	106	0.1029	0.42	0.657
Kisspeptin/kisspeptin receptor system in the ovary	3	27	49	0.1111	0.41	0.687
miRNAs involved in DNA damage response	3	27	70	0.1111	0.41	0.706
IL-1 signaling pathway	5	48	57	0.1042	0.38	0.697
Physico-chemical features and toxicity-associated pathways	5	48	78	0.1042	0.38	0.699
Focal adhesion: PI3K-Akt-mTOR-signaling pathway	20	209	305	0.0957	0.37	0.719
IL-6 signaling pathway	4	38	45	0.1053	0.36	0.731
Acquired partial lipodystrophy / Barraquer-Simons syndrome	1	8	17	0.125	0.36	0.771
BMP2-WNT4-FOXO1 pathway in primary endometrial stromal cell differentiation	1	8	16	0.125	0.36	0.781
Bone morphogenic protein (BMP) signaling and regulation	1	8	13	0.125	0.36	0.919
Dopamine metabolism	1	8	48	0.125	0.36	0.72
Dual hijack model of Vif in HIV infection	1	8	10	0.125	0.36	0.966
Ethanol metabolism production of ROS by CYP2E1	1	8	28	0.125	0.36	0.668
Inclusion body myositis	1	8	27	0.125	0.36	0.683
Interleukin-1 induced activation of NF-kB	1	8	13	0.125	0.36	0.908
Ketogenesis and ketolysis	1	8	27	0.125	0.36	0.694
LDLRAD4 and what we know about it	1	8	12	0.125	0.36	0.939
Leptin and adiponectin	1	8	14	0.125	0.36	0.894
Macrophage markers	1	8	10	0.125	0.36	0.963
Mitochondrial complex II assembly	1	8	10	0.125	0.36	0.967
NAD biosynthesis II (from tryptophan)	1	8	34	0.125	0.36	0.756
Thiamine metabolic pathways	1	8	34	0.125	0.36	0.771
Transcription factors regulate miRNAs related to cardiac hypertrophy	1	8	16	0.125	0.36	0.796
ncRNAs involved in Wnt signaling in hepatocellular carcinoma	6	59	96	0.1017	0.36	0.739
Insulin signaling	13	134	162	0.097	0.35	0.733
PI3K-AKT-mTOR signaling pathway and therapeutic opportunities	3	28	33	0.1071	0.35	0.767
Renin-angiotensin-aldosterone system (RAAS)	3	28	57	0.1071	0.35	0.697
Wnt signaling pathway and pluripotency	7	70	106	0.1	0.34	0.747
15q13.3 copy number variation syndrome	2	18	40	0.1111	0.34	0.776
Fatty acid biosynthesis	2	18	43	0.1111	0.34	0.742
Urea cycle and metabolism of amino groups	2	18	71	0.1111	0.34	0.74
Adipogenesis	9	92	132	0.0978	0.32	0.736
One-carbon metabolism and related pathways	4	39	94	0.1026	0.31	0.786
Circadian rhythm genes	13	136	209	0.0956	0.29	0.777
Apoptosis modulation and signaling	8	82	97	0.0976	0.29	0.775
Neural crest cell migration during development	3	29	40	0.1034	0.28	0.81
NO/cGMP/PKG mediated neuroprotection	3	29	65	0.1034	0.28	0.782
Vitamin B12 metabolism	3	29	118	0.1034	0.28	0.805
Chemokine signaling pathway	12	126	172	0.0952	0.27	0.783
1q21.1 copy number variation syndrome	2	19	58	0.1053	0.26	0.823
Angiotensin II receptor type 1 pathway	2	19	37	0.1053	0.26	0.833
mBDNF and proBDNF regulation of GABA neurotransmission	2	19	40	0.1053	0.26	0.822
Nucleotide metabolism	2	19	37	0.1053	0.26	0.847
Progeria-associated lipodystrophy	2	19	36	0.1053	0.26	0.84
Apoptosis-related network due to altered Notch3 in ovarian cancer	5	51	54	0.098	0.24	0.82
Mitochondrial complex I assembly model OXPHOS system	5	51	61	0.098	0.24	0.811
Familial hyperlipidemia type 5	1	9	28	0.1111	0.24	0.764
Mammary gland development pathway - Embryonic development (Stage 1 of 4)	1	9	21	0.1111	0.24	0.728
Nanomaterial-induced inflammasome activation	1	9	13	0.1111	0.24	0.956
Nicotine effect on dopaminergic neurons	1	9	31	0.1111	0.24	0.817
Non-homologous end joining	1	9	11	0.1111	0.24	0.991
Nucleotide GPCRs	1	9	15	0.1111	0.24	0.912
Omega-9 fatty acid synthesis	1	9	44	0.1111	0.24	0.805
Aryl hydrocarbon receptor pathway	3	30	49	0.1	0.22	0.787
p38 MAPK signaling pathway	3	30	36	0.1	0.22	0.909
Electron transport chain: OXPHOS system in mitochondria	9	95	119	0.0947	0.21	0.828
Folate metabolism	4	41	142	0.0976	0.2	0.862
Kit receptor signaling pathway	5	52	60	0.0962	0.19	0.896
Thyroid hormones production and peripheral downstream signaling effects	7	74	134	0.0946	0.18	0.843
Hepatitis B infection	11	118	155	0.0932	0.18	0.846
Host-pathogen interaction of human coronaviruses - apoptosis	2	20	34	0.1	0.18	0.909
MTHFR deficiency	2	20	60	0.1	0.18	0.881
Statin inhibition of cholesterol production	2	20	50	0.1	0.18	0.829
Striated muscle contraction pathway	2	20	39	0.1	0.18	0.866
Photodynamic therapy-induced HIF-1 survival signaling	3	31	38	0.0968	0.16	0.91
Aryl hydrocarbon receptor Netpath	4	42	57	0.0952	0.15	0.885
ATM signaling in development and disease	4	42	49	0.0952	0.15	0.841
Endochondral ossification with skeletal dysplasias	4	42	69	0.0952	0.15	0.882
Endochondral ossification	4	42	69	0.0952	0.15	0.882
mRNA processing	11	119	130	0.0924	0.15	0.879
Glucocorticoid receptor pathway	5	53	73	0.0943	0.15	0.888
Complement system	6	64	143	0.0938	0.15	0.874
T-cell activation SARS-CoV-2	6	64	98	0.0938	0.15	0.883
Autosomal recessive osteopetrosis pathways	1	10	14	0.1	0.13	0.972
Blood clotting cascade	1	10	27	0.1	0.13	0.878
Disorders of folate metabolism and transport	1	10	46	0.1	0.13	0.885
Familial hyperlipidemia type 1	1	10	35	0.1	0.13	0.941
Iron metabolism in placenta	1	10	15	0.1	0.13	0.95
Major receptors targeted by epinephrine and norepinephrine	1	10	34	0.1	0.13	0.959
Mammary gland development pathway - Puberty (Stage 2 of 4)	1	10	15	0.1	0.13	0.959
Osteoclast signaling	1	10	21	0.1	0.13	0.836
SRF and miRs in smooth muscle differentiation and proliferation	1	10	18	0.1	0.13	0.881
Sudden infant death syndrome (SIDS) susceptibility pathways	9	98	182	0.0918	0.12	0.907
Heart development	2	21	48	0.0952	0.11	0.891
T cell receptor and co-stimulatory signaling	2	21	45	0.0952	0.11	0.886
Endometrial cancer	5	54	77	0.0926	0.11	0.937
Fibrin complement receptor 3 signaling pathway	3	32	47	0.0938	0.1	0.897
IL-3 signaling pathway	4	43	50	0.093	0.1	0.902
Neuroinflammation and glutamatergic signaling	9	99	178	0.0909	0.08	0.939
Chromosomal and microsatellite instability in colorectal cancer	6	66	81	0.0909	0.07	0.927
Overview of proinflammatory and profibrotic mediators	5	55	134	0.0909	0.06	0.944
miRNA regulation of p53 pathway in prostate cancer	2	22	37	0.0909	0.04	0.978
Purinergic signaling	2	22	96	0.0909	0.04	0.963
Prolactin signaling pathway	6	67	79	0.0896	0.03	0.975
Galanin receptor pathway	1	11	22	0.0909	0.03	0.951
Leptin-insulin signaling overlap	1	11	20	0.0909	0.03	0.937
Nitric oxide metabolism in cystic fibrosis	1	11	25	0.0909	0.03	0.944
OSX and miRNAs in tooth development	1	11	39	0.0909	0.03	0.981
Nuclear receptors meta-pathway	19	214	339	0.0888	0.01	0.983
Arrhythmogenic right ventricular cardiomyopathy	4	45	81	0.0889	0.01	0.983
CCL18 signaling pathway	3	34	177	0.0882	-0.01	0.996
Parkinson's disease pathway	3	34	84	0.0882	-0.01	0.987
Nucleotide excision repair in xeroderma pigmentosum	5	57	62	0.0877	-0.02	0.984
p53 transcriptional gene network	5	57	78	0.0877	-0.02	0.97
Endothelin pathways	2	23	48	0.087	-0.03	0.964
One-carbon metabolism	2	23	58	0.087	-0.03	0.986
Melanoma	5	58	78	0.0862	-0.06	0.949
Canonical and non-canonical TGF-B signaling	1	12	18	0.0833	-0.06	0.938
Deregulation of Rab and Rab effector genes in bladder cancer	1	12	17	0.0833	-0.06	0.951
Glycosaminoglycan degradation	1	12	45	0.0833	-0.06	0.944
Kennedy pathway from sphingolipids	1	12	35	0.0833	-0.06	0.967
Metabolic pathway of LDL, HDL and TG, including diseases	1	12	34	0.0833	-0.06	0.963
Small ligand GPCRs	1	12	25	0.0833	-0.06	0.867
16p11.2 distal deletion syndrome	2	24	46	0.0833	-0.09	0.899
Extracellular vesicle-mediated signaling in recipient cells	2	24	31	0.0833	-0.09	0.939
Tryptophan metabolism	2	24	140	0.0833	-0.09	0.933
Bladder cancer	3	36	47	0.0833	-0.11	0.888
Cholesterol metabolism with Bloch and Kandutsch-Russell pathways	3	36	97	0.0833	-0.11	0.915
Proximal tubule transport	3	36	86	0.0833	-0.11	0.895
T-cell receptor (TCR) signaling pathway	6	71	93	0.0845	-0.12	0.92
Amplification and expansion of oncogenic pathways as metastatic traits	1	13	18	0.0769	-0.15	0.882
Cholesterol biosynthesis pathway	1	13	32	0.0769	-0.15	0.908
Familial hyperlipidemia type 4	1	13	36	0.0769	-0.15	0.933
Neuroinflammation	1	13	31	0.0769	-0.15	0.877
Osteopontin signaling	1	13	14	0.0769	-0.15	0.975
Regulation of Wnt / B-catenin signaling by small molecule compounds	1	13	33	0.0769	-0.15	0.921
TCA cycle and deficiency of pyruvate dehydrogenase complex (PDHc)	1	13	37	0.0769	-0.15	0.927
Common pathways underlying drug addiction	2	25	50	0.08	-0.15	0.865
Development of ureteric collection system	2	25	63	0.08	-0.15	0.89
Effect of progerin on genes involved in Hutchinson-Gilford progeria syndrome	2	25	30	0.08	-0.15	0.871
Nanoparticle-mediated activation of receptor signaling	2	25	36	0.08	-0.15	0.926
Regucalcin in proximal tubule epithelial kidney cells	2	25	68	0.08	-0.15	0.887
Sphingolipid metabolism in senescence	2	25	49	0.08	-0.15	0.875
Overlap between signal transduction pathways contributing to LMNA laminopathies	4	49	73	0.0816	-0.17	0.837
Joubert syndrome	5	61	87	0.082	-0.18	0.867
Nonalcoholic fatty liver disease	11	131	170	0.084	-0.18	0.853
Embryonic stem cell pluripotency pathways	6	73	123	0.0822	-0.19	0.848
Autophagy	2	26	33	0.0769	-0.21	0.893
Vitamin D-sensitive calcium signaling in depression	2	26	55	0.0769	-0.21	0.821
MECP2 and associated Rett syndrome	4	50	114	0.08	-0.21	0.846
SARS-CoV-2 innate immunity evasion and cell-specific immune response	4	50	92	0.08	-0.21	0.82
FOXA2 pathway	1	14	23	0.0714	-0.23	0.737
MAP3K1 role in promoting and blocking gonadal determination	1	14	18	0.0714	-0.23	0.879
MAPK pathway in congenital thyroid cancer	1	14	19	0.0714	-0.23	0.832
PKC-gamma calcium signaling pathway in ataxia	1	14	29	0.0714	-0.23	0.762
SREBF and miR33 in cholesterol and lipid homeostasis	1	14	19	0.0714	-0.23	0.842
GPCRs, class A rhodopsin-like	8	98	272	0.0816	-0.24	0.81
Interleukin-11 signaling pathway	3	39	45	0.0769	-0.26	0.825
Base excision repair	2	27	32	0.0741	-0.26	0.808
Familial partial lipodystrophy (FPLD)	2	27	44	0.0741	-0.26	0.736
Signal transduction through IL1R	2	27	34	0.0741	-0.26	0.851
Ras signaling	11	135	192	0.0815	-0.29	0.773
Histone modifications	5	64	68	0.0781	-0.29	0.775
Pyrimidine metabolism	6	76	140	0.0789	-0.3	0.78
IL-9 signaling pathway	1	15	18	0.0667	-0.3	0.796
Monoamine GPCRs	1	15	43	0.0667	-0.3	0.774
Overview of nanoparticle effects	1	15	42	0.0667	-0.3	0.796
Pathways of nucleic acid metabolism and innate immune sensing	1	15	39	0.0667	-0.3	0.817
PI3K/AKT/mTOR - VitD3 signaling	1	15	34	0.0667	-0.3	0.818
Serotonin receptor 4/6/7 and NR3C signaling	1	15	22	0.0667	-0.3	0.686
Transcription factor regulation in adipogenesis	1	15	24	0.0667	-0.3	0.66
Type II diabetes mellitus	1	15	28	0.0667	-0.3	0.683
Energy metabolism	3	40	49	0.075	-0.3	0.74
Endoderm differentiation	8	100	147	0.08	-0.3	0.794
Regulation of toll-like receptor signaling pathway	9	112	153	0.0804	-0.31	0.75
Aripiprazole metabolic pathway	0	1	7	0	-0.31	0.937
Caffeine and theobromine metabolism	0	1	18	0	-0.31	0.801
Catalytic cycle of mammalian flavin-containing monooxygenases (FMOs)	0	1	14	0	-0.31	0.926
COVID-19, thrombosis and anticoagulation	0	1	27	0	-0.31	0.691
Diclofenac metabolic pathway	0	1	12	0	-0.31	0.982
Downregulation of ACE2 expression by SARS-CoV infection and SARS-CoV spike protein	0	1	8	0	-0.31	0.963
Evolocumab mechanism to reduce LDL cholesterol	0	1	5	0	-0.31	0.796
FABP4 in ovarian cancer	0	1	3	0	-0.31	0.484
Hypothetical craniofacial development pathway	0	1	11	0	-0.31	0.985
Influenza A virus infection	0	1	16	0	-0.31	0.873
Model for regulation of MSMP expression in cancer cells and its proangiogenic role in ovarian tumors	0	1	6	0	-0.31	0.875
Nicotine metabolism in liver cells	0	1	18	0	-0.31	0.812
PCSK9-mediated LDL receptor degradation	0	1	3	0	-0.31	0.496
Soluble ACE2-mediated cell entry of SARS-CoV-2	0	1	7	0	-0.31	0.931
Type 2 papillary renal cell carcinoma	2	28	41	0.0714	-0.32	0.765
Genotoxicity pathway	4	53	65	0.0755	-0.34	0.758
Ebola virus pathway in host	9	114	141	0.0789	-0.36	0.719
Apoptosis modulation by HSP70	1	16	22	0.0625	-0.37	0.663
Interactome of polycomb repressive complex 2 (PRC2)	1	16	17	0.0625	-0.37	0.773
Overview of interferons-mediated signaling pathway	1	16	38	0.0625	-0.37	0.718
Alpha 6 beta 4 signaling pathway	2	29	34	0.069	-0.37	0.71
MAPK cascade	2	29	37	0.069	-0.37	0.727
Tumor suppressor activity of SMARCB1	2	29	35	0.069	-0.37	0.72
22q11.2 copy number variation syndrome	8	103	225	0.0777	-0.39	0.683
Pancreatic adenocarcinoma pathway	6	79	97	0.0759	-0.4	0.668
Clear cell renal cell carcinoma pathways	5	67	92	0.0746	-0.4	0.699
Corticotropin-releasing hormone signaling pathway	5	67	98	0.0746	-0.4	0.71
Myometrial relaxation and contraction pathways	8	104	161	0.0769	-0.42	0.661
Neovascularisation processes	2	30	42	0.0667	-0.42	0.741
Prostaglandin synthesis and regulation	2	30	61	0.0667	-0.42	0.642
Oligodendrocyte specification and differentiation, leading to myelin components for CNS	1	17	46	0.0588	-0.43	0.674
Pregnane X receptor pathway	1	17	35	0.0588	-0.43	0.64
Transcription co-factors SKI and SKIL protein partners	1	17	19	0.0588	-0.43	0.723
Hippo signaling regulation pathways	5	68	104	0.0735	-0.44	0.663
Biosynthesis and regeneration of tetrahydrobiopterin and catabolism of phenylalanine	0	2	38	0	-0.44	0.672
Butyrate-induced histone acetylation	0	2	11	0	-0.44	0.93
Gastric acid production	0	2	22	0	-0.44	0.661
Heroin metabolism	0	2	8	0	-0.44	0.844
HIPK2 in kidney fibrosis	0	2	8	0	-0.44	0.848
Mevalonate arm of cholesterol biosynthesis pathway with inhibitors	0	2	64	0	-0.44	0.663
Neurotransmitter disorders	0	2	27	0	-0.44	0.626
Nicotine effect on chromaffin cells	0	2	10	0	-0.44	0.91
Polyol pathway	0	2	17	0	-0.44	0.759
Secretion of hydrochloric acid in parietal cells	0	2	15	0	-0.44	0.828
Tamoxifen metabolism	0	2	37	0	-0.44	0.664
Complement and coagulation cascades	2	31	63	0.0645	-0.47	0.612
Overview of leukocyte-intrinsic Hippo pathway functions	2	31	37	0.0645	-0.47	0.63
Hypothesized pathways in pathogenesis of cardiovascular disease	1	18	27	0.0556	-0.49	0.63
IL1 and megakaryocytes in obesity	1	18	26	0.0556	-0.49	0.629
PPAR-alpha pathway	1	18	28	0.0556	-0.49	0.622
TP53 network	1	18	23	0.0556	-0.49	0.645
Urea cycle and associated pathways	1	18	81	0.0556	-0.49	0.658
Vitamin A and carotenoid metabolism	1	18	65	0.0556	-0.49	0.611
Wnt/beta-catenin signaling pathway in leukemia	1	18	29	0.0556	-0.49	0.586
Copper homeostasis	3	45	58	0.0667	-0.52	0.622
T-cell antigen receptor (TCR) pathway during Staphylococcus aureus infection	3	45	70	0.0667	-0.52	0.627
Influence of laminopathies on Wnt signaling	2	32	45	0.0625	-0.52	0.653
Hippo-Merlin signaling dysregulation	6	83	121	0.0723	-0.52	0.632
Arylamine metabolism	0	3	13	0	-0.54	0.806
Conversion of angiotensinogen to angiotensin II	0	3	9	0	-0.54	0.744
Direct reversal repair	0	3	4	0	-0.54	0.207
eIF5A regulation in response to inhibition of the nuclear export system	0	3	6	0	-0.54	0.432
Ethylmalonic encephalopathy	0	3	20	0	-0.54	0.645
Fatty acid omega-oxidation	0	3	20	0	-0.54	0.636
GABA metabolism (aka GHB)	0	3	42	0	-0.54	0.615
Glycine metabolism	0	3	19	0	-0.54	0.665
MED and pseudoachondroplasia genes	0	3	7	0	-0.54	0.536
MicroRNA network associated with chronic lymphocytic leukemia	0	3	10	0	-0.54	0.784
Oxytocin signaling	0	3	10	0	-0.54	0.772
SARS-CoV-2 altering angiogenesis via NRP1	0	3	11	0	-0.54	0.805
SARS-CoV-2 and angiotensin-converting enzyme 2 receptor: molecular mechanisms	0	3	14	0	-0.54	0.8
Somitogenesis in the context of spondylocostal dysostosis	0	3	10	0	-0.54	0.805
Thyroxine (thyroid hormone) production	0	3	12	0	-0.54	0.798
Vitamins A and D - action mechanisms	0	3	14	0	-0.54	0.755
Vitamin B6-dependent and responsive disorders	0	3	29	0	-0.54	0.559
NAD+ biosynthetic pathways	1	19	37	0.0526	-0.55	0.538
RAS and bradykinin pathways in COVID-19	1	19	51	0.0526	-0.55	0.619
Proteasome degradation	4	59	67	0.0678	-0.56	0.562
FBXL10 enhancement of MAP/ERK signaling in diffuse large B-cell lymphoma	2	33	36	0.0606	-0.57	0.532
Host-pathogen interaction of human coronaviruses - MAPK signaling	2	33	43	0.0606	-0.57	0.603
Microglia pathogen phagocytosis pathway	2	33	44	0.0606	-0.57	0.613
Nucleotide-binding oligomerization domain (NOD) pathway	2	33	43	0.0606	-0.57	0.613
Parkin-ubiquitin proteasomal system pathway	4	60	75	0.0667	-0.6	0.613
Complement system in neuronal development and plasticity	5	73	137	0.0685	-0.61	0.57
Osteoblast differentiation and related diseases	5	73	119	0.0685	-0.61	0.56
Disruption of postsynaptic signaling by CNV	1	20	35	0.05	-0.61	0.491
Eicosanoid metabolism via cyclooxygenases (COX)	1	20	70	0.05	-0.61	0.559
Host-pathogen interaction of human coronaviruses - autophagy	1	20	23	0.05	-0.61	0.645
NAD metabolism in oncogene-induced senescence and mitochondrial dysfunction-associated senescence	1	20	46	0.05	-0.61	0.59
Sphingolipid metabolism overview	1	20	55	0.05	-0.61	0.568
Lung fibrosis	2	34	85	0.0588	-0.61	0.524
PDGF pathway	2	34	53	0.0588	-0.61	0.578
Aflatoxin B1 metabolism	0	4	16	0	-0.62	0.702
Control of immune tolerance by vasoactive intestinal peptide	0	4	16	0	-0.62	0.71
Eicosanoid metabolism via cytochrome P450 monooxygenases (CYP) pathway	0	4	23	0	-0.62	0.615
Irinotecan pathway	0	4	18	0	-0.62	0.686
Ketone bodies synthesis and degradation	0	4	13	0	-0.62	0.69
let-7 inhibition of ES cell reprogramming	0	4	17	0	-0.62	0.682
Linoleic acid metabolism affected by coronavirus infection	0	4	28	0	-0.62	0.537
miR-222 in exercise-induced cardiac growth	0	4	5	0	-0.62	0.232
Robo4 and VEGF signaling pathways crosstalk	0	4	7	0	-0.62	0.378
Serotonin receptor 2 and STAT3 signaling	0	4	6	0	-0.62	0.278
Nephrotic syndrome	2	35	49	0.0571	-0.65	0.551
Glycerolipids and glycerophospholipids	1	21	52	0.0476	-0.66	0.544
Intracellular trafficking proteins involved in CMT neuropathy	1	21	28	0.0476	-0.66	0.53
Nuclear receptors in lipid metabolism and toxicity	1	21	48	0.0476	-0.66	0.506
Sphingolipid metabolism: integrated pathway	1	21	97	0.0476	-0.66	0.513
Allograft Rejection	3	49	113	0.0612	-0.67	0.498
Genes related to primary cilium development (based on CRISPR)	6	88	104	0.0682	-0.68	0.485
Arachidonate epoxygenase / epoxide hydrolase	0	5	18	0	-0.7	0.594
Benzo(a)pyrene metabolism	0	5	17	0	-0.7	0.601
Caloric restriction and aging	0	5	13	0	-0.7	0.542
Cholesterol biosynthesis with skeletal dysplasias	0	5	23	0	-0.7	0.619
Codeine and morphine metabolism	0	5	25	0	-0.7	0.589
Effects of nitric oxide	0	5	16	0	-0.7	0.577
Fluoroacetic acid toxicity	0	5	16	0	-0.7	0.559
Folate-alcohol and cancer pathway hypotheses	0	5	24	0	-0.7	0.59
Gamma-glutamyl cycle for the biosynthesis and degradation of glutathione, including diseases	0	5	24	0	-0.7	0.569
Kinin-Kallikrein pathway	0	5	10	0	-0.7	0.445
Lamin A-processing pathway	0	5	8	0	-0.7	0.317
Methylation pathways	0	5	15	0	-0.7	0.595
mir-124 predicted interactions with cell cycle and differentiation	0	5	8	0	-0.7	0.318
Phase I biotransformations, non P450	0	5	13	0	-0.7	0.55
PTF1A related regulatory pathway	0	5	12	0	-0.7	0.51
Somatic sex determination	0	5	15	0	-0.7	0.549
Somatroph axis (GH) and its relationship to dietary restriction and aging	0	5	12	0	-0.7	0.494
TCA cycle nutrient use and invasiveness of ovarian cancer	0	5	11	0	-0.7	0.453
Ebstein-Barr virus LMP1 signaling	1	22	25	0.0455	-0.71	0.571
IL-7 signaling pathway	1	22	26	0.0455	-0.71	0.556
Cardiac progenitor differentiation	1	23	56	0.0435	-0.76	0.472
Glycosylation and related congenital defects	1	23	73	0.0435	-0.76	0.436
Immune response to tuberculosis	1	23	24	0.0435	-0.76	0.596
Intraflagellar transport proteins binding to dynein	1	23	28	0.0435	-0.76	0.495
White fat cell differentiation	1	23	35	0.0435	-0.76	0.425
Alternative pathway of fetal androgen synthesis	0	6	48	0	-0.76	0.436
Biogenic amine synthesis	0	6	33	0	-0.76	0.418
Biomarkers for urea cycle disorders	0	6	51	0	-0.76	0.457
Degradation pathway of sphingolipids, including diseases	0	6	41	0	-0.76	0.438
FTO obesity variant mechanism	0	6	11	0	-0.76	0.335
Gene regulatory network modelling somitogenesis	0	6	13	0	-0.76	0.421
Glucuronidation	0	6	41	0	-0.76	0.429
Krebs cycle disorders	0	6	34	0	-0.76	0.433
Lipid particles composition	0	6	21	0	-0.76	0.607
miRNA biogenesis	0	6	7	0	-0.76	0.23
Molybdenum cofactor (Moco) biosynthesis	0	6	21	0	-0.76	0.586
Pentose phosphate metabolism	0	6	21	0	-0.76	0.563
SARS-CoV-2 and COVID-19 pathway	0	6	70	0	-0.76	0.441
Steroid biosynthesis	0	6	25	0	-0.76	0.525
EPO receptor signaling	1	24	27	0.0417	-0.81	0.567
IL-17 signaling pathway	1	24	33	0.0417	-0.81	0.446
Lipid metabolism pathway	1	24	43	0.0417	-0.81	0.378
Mitochondrial immune response to SARS-CoV-2	1	24	62	0.0417	-0.81	0.412
Wnt signaling in kidney disease	1	24	39	0.0417	-0.81	0.369
Zinc homeostasis	1	24	39	0.0417	-0.81	0.401
ACE inhibitor pathway	0	7	29	0	-0.82	0.499
Activation of NLRP3 inflammasome by SARS-CoV-2	0	7	10	0	-0.82	0.265
Bile acids synthesis and enterohepatic circulation	0	7	18	0	-0.82	0.452
Cerebral organic acidurias, including diseases	0	7	46	0	-0.82	0.417
Drug induction of bile acid pathway	0	7	45	0	-0.82	0.415
EDA signaling in hair follicle development	0	7	15	0	-0.82	0.363
Farnesoid X receptor pathway	0	7	21	0	-0.82	0.552
Genes targeted by miRNAs in adipocytes	0	7	19	0	-0.82	0.5
Liver X receptor pathway	0	7	12	0	-0.82	0.28
Sulfation biotransformation reaction	0	7	29	0	-0.82	0.48
Type III interferon signaling	0	7	11	0	-0.82	0.242
Valproic acid pathway	0	7	36	0	-0.82	0.44
Vitamin D metabolism	0	7	22	0	-0.82	0.554
Leptin signaling pathway	4	67	77	0.0597	-0.83	0.384
Interactions of natural killer cells in pancreatic cancer	1	25	43	0.04	-0.86	0.381
Oxidation by cytochrome P450	1	25	75	0.04	-0.86	0.41
Photodynamic therapy-induced unfolded protein response	1	25	28	0.04	-0.86	0.484
Unfolded protein response	1	25	28	0.04	-0.86	0.463
15q11.2 copy number variation syndrome	0	8	13	0	-0.88	0.2
Alanine and aspartate metabolism	0	8	66	0	-0.88	0.37
Altered glycosylation of MUC1 in tumor microenvironment	0	8	10	0	-0.88	0.184
Canonical NF-kB pathway	0	8	9	0	-0.88	0.17
GPCRs, class C metabotropic glutamate, pheromone	0	8	15	0	-0.88	0.245
Hijack of ubiquitination by SARS-CoV-2	0	8	12	0	-0.88	0.166
IL-10 anti-inflammatory signaling pathway	0	8	19	0	-0.88	0.385
SARS-CoV-2 B.1.1.7 variant antagonises innate immune activation	0	8	15	0	-0.88	0.264
Serotonin and anxiety-related events	0	8	16	0	-0.88	0.306
Supression of HMGB1 mediated inflammation by THBD	0	8	10	0	-0.88	0.18
Nucleotide excision repair	2	41	44	0.0488	-0.9	0.331
Thymic stromal lymphopoietin (TSLP) signaling pathway	2	41	49	0.0488	-0.9	0.355
CAMKK2 pathway	1	26	143	0.0385	-0.9	0.358
Glycerophospholipid biosynthetic pathway	1	26	107	0.0385	-0.9	0.356
Interactions between immune cells and microRNAs in tumor microenvironment	1	26	52	0.0385	-0.9	0.33
TLR4 signaling and tolerance	1	26	30	0.0385	-0.9	0.448
Trans-sulfuration and one-carbon metabolism	1	26	66	0.0385	-0.9	0.362
Type I interferon induction and signaling during SARS-CoV-2 infection	1	26	45	0.0385	-0.9	0.318
Aerobic glycolysis	0	9	35	0	-0.94	0.414
ApoE and miR-146 in inflammation and atherosclerosis	0	9	13	0	-0.94	0.146
Biotin metabolism, including IEMs	0	9	38	0	-0.94	0.36
Cancer immunotherapy by CTLA4 blockade	0	9	21	0	-0.94	0.409
Classical pathway of steroidogenesis with glucocorticoid and mineralocorticoid metabolism	0	9	73	0	-0.94	0.374
Cori cycle	0	9	53	0	-0.94	0.34
Cytokines and inflammatory response	0	9	32	0	-0.94	0.408
Familial hyperlipidemia type 2	0	9	36	0	-0.94	0.399
Familial hyperlipidemia type 3	0	9	24	0	-0.94	0.481
Heme biosynthesis	0	9	28	0	-0.94	0.442
Mammary gland development pathway - Involution (Stage 4 of 4)	0	9	13	0	-0.94	0.155
Methionine metabolism leading to sulfur amino acids and related disorders	0	9	46	0	-0.94	0.344
Nod-like receptor (NLR) signaling pathway	0	9	11	0	-0.94	0.178
NOTCH1 regulation of endothelial cell calcification	0	9	18	0	-0.94	0.305
Vitamin B12 disorders	0	9	36	0	-0.94	0.351
Exercise-induced circadian regulation	2	42	49	0.0476	-0.94	0.319
Neurodegeneration with brain iron accumulation (NBIA) subtypes pathway	2	42	77	0.0476	-0.94	0.334
Peptide GPCRs	1	27	79	0.037	-0.94	0.329
RAC1/PAK1/p38/MMP2 pathway	3	57	74	0.0526	-0.96	0.347
Toll-like receptor signaling related to MyD88	1	28	32	0.0357	-0.99	0.408
FGF23 signaling in hypophosphatemic rickets and related disorders	0	10	28	0	-0.99	0.366
Genes associated with the development of rheumatoid arthritis	0	10	22	0	-0.99	0.317
TCA cycle in senescence	0	10	30	0	-0.99	0.385
Trans-sulfuration pathway	0	10	25	0	-0.99	0.359
Splicing factor NOVA regulated synaptic proteins	1	29	44	0.0345	-1.03	0.317
Aspirin and miRNAs	0	11	24	0	-1.03	0.274
Complement activation	0	11	24	0	-1.03	0.28
Development of pulmonary dendritic cells and macrophage subsets	0	11	14	0	-1.03	0.15
Dopaminergic neurogenesis	0	11	32	0	-1.03	0.371
Glycolysis in senescence	0	11	26	0	-1.03	0.331
GPCRs, class B secretin-like	0	11	24	0	-1.03	0.312
miR-509-3p alteration of YAP1/ECM axis	0	11	19	0	-1.03	0.19
Purine metabolism	0	11	94	0	-1.03	0.295
Transcriptional cascade regulating adipogenesis	0	11	14	0	-1.03	0.152
GPCRs, other	2	45	114	0.0444	-1.04	0.303
Development and heterogeneity of the ILC family	0	12	33	0	-1.08	0.351
Differentiation of white and brown adipocyte	0	12	26	0	-1.08	0.271
Ganglio sphingolipid metabolism	0	12	56	0	-1.08	0.27
Mammalian disorder of sexual development	0	12	29	0	-1.08	0.318
MAPK and NFkB signaling pathways inhibited by Yersinia YopJ	0	12	13	0	-1.08	0.129
Mevalonate arm of cholesterol biosynthesis pathway	0	12	55	0	-1.08	0.266
Nanoparticle triggered regulated necrosis	0	12	26	0	-1.08	0.296
RalA downstream regulated genes	0	12	13	0	-1.08	0.135
Serotonin and anxiety	0	12	22	0	-1.08	0.197
Host-pathogen interaction of human coronaviruses - interferon induction	1	31	47	0.0323	-1.1	0.262
Cell differentiation - index	0	13	61	0	-1.12	0.25
GABA receptor signaling	0	13	57	0	-1.12	0.245
H19 action Rb-E2F1 signaling and CDK-Beta-catenin activity	0	13	17	0	-1.12	0.154
Mitochondrial gene expression	0	13	23	0	-1.12	0.181
Mitochondrial complex IV assembly	1	32	40	0.0313	-1.14	0.304
Cysteine and methionine catabolism	0	14	74	0	-1.17	0.238
Extracellular vesicles in the crosstalk of cardiac cells	0	14	30	0	-1.17	0.23
Mitochondrial complex III assembly	0	14	19	0	-1.17	0.137
Riboflavin and CoQ disorders	0	14	59	0	-1.17	0.237
IL-4 signaling pathway	2	49	55	0.0408	-1.18	0.238
miRNAs involvement in the immune response in sepsis	1	33	69	0.0303	-1.18	0.218
DNA repair pathways, full network	6	108	125	0.0556	-1.21	0.215
Metabolic reprogramming in colon cancer	1	34	80	0.0294	-1.22	0.225
Ciliopathies	8	136	184	0.0588	-1.23	0.223
Epithelial to mesenchymal transition in colorectal cancer	6	109	163	0.055	-1.24	0.207
Cell differentiation - expanded index	0	16	69	0	-1.25	0.216
miRNA targets in ECM and membrane receptors	0	16	46	0	-1.25	0.245
SARS coronavirus and innate immunity	0	16	33	0	-1.25	0.205
Serotonin receptor 2 and ELK-SRF/GATA4 signaling	0	16	24	0	-1.25	0.104
Novel intracellular components of RIG-I-like receptor (RLR) pathway	2	52	64	0.0385	-1.27	0.173
Constitutive androstane receptor pathway	0	17	34	0	-1.29	0.177
Kynurenine pathway and links to cell senescence	0	17	56	0	-1.29	0.194
Proteoglycan biosynthesis	0	17	36	0	-1.29	0.166
Purine metabolism and related disorders	0	17	139	0	-1.29	0.186
Selective expression of chemokine receptors during T-cell polarization	0	17	30	0	-1.29	0.142
Triacylglyceride synthesis	0	17	37	0	-1.29	0.177
Inhibition of exosome biogenesis and secretion by Manumycin A in CRPC cells	0	18	19	0	-1.32	0.1
Amino acid metabolism	3	70	205	0.0429	-1.35	0.172
STING pathway in Kawasaki-like disease and COVID-19	0	19	26	0	-1.36	0.113
Regulation of apoptosis by parathyroid hormone-related protein	0	20	24	0	-1.4	0.087
Cannabinoid receptor signaling	0	21	54	0	-1.43	0.158
Hippo-Yap signaling pathway	0	21	24	0	-1.43	0.081
Mammary gland development pathway - Pregnancy and lactation (Stage 3 of 4)	0	21	42	0	-1.43	0.133
7-oxo-C and 7-beta-HC pathways	0	23	60	0	-1.5	0.132
FGFR3 signaling in chondrocyte proliferation and terminal differentiation	0	23	29	0	-1.5	0.094
Nuclear receptors	0	23	44	0	-1.5	0.112
Endoplasmic reticulum stress response in coronavirus infection	1	43	57	0.0233	-1.51	0.131
Type I collagen synthesis in the context of osteogenesis imperfecta	0	24	36	0	-1.53	0.055
Sterol regulatory element-binding proteins (SREBP) signaling	2	61	77	0.0328	-1.54	0.108
Alzheimer's disease	12	208	288	0.0577	-1.58	0.117
Sphingolipid pathway	0	26	63	0	-1.59	0.109
Alzheimer's disease and miRNA effects	12	209	358	0.0574	-1.6	0.114
Type II interferon signaling (IFNG)	0	27	38	0	-1.62	0.087
Oxysterols derived from cholesterol	0	28	112	0	-1.65	0.096
Metapathway biotransformation Phase I and II	3	83	191	0.0361	-1.69	0.103
Glycolysis and gluconeogenesis	0	31	69	0	-1.74	0.081
Acute viral myocarditis	2	69	110	0.029	-1.75	0.093
Glycogen synthesis and degradation	0	32	54	0	-1.77	0.041
Eukaryotic transcription initiation	0	35	42	0	-1.85	0.055
Cytosolic DNA-sensing pathway	0	52	77	0	-2.25	0.022
Acrylamide biotransformation and exposure biomarkers	0	0	10	NaN%	NaN	0
Amino acid conjugation of benzoic acid	0	0	15	NaN%	NaN	0
Amino acid conjugation	0	0	7	NaN%	NaN	0
Biochemical pathways: part I	0	0	471	NaN%	NaN	0
Blood clotting and drug effects	0	0	13	NaN%	NaN	0
Colchicine metabolic pathway	0	0	5	NaN%	NaN	0
Felbamate metabolism	0	0	12	NaN%	NaN	0
Glucose homeostasis	0	0	24	NaN%	NaN	0
Lidocaine metabolism	0	0	11	NaN%	NaN	0
Liver steatosis adverse outcome pathway	0	0	46	NaN%	NaN	0
Metabolism of dichloroethylene by CYP450	0	0	13	NaN%	NaN	0
Metabolism of tetrahydrocannabinol (THC)	0	0	11	NaN%	NaN	0
Metabolism overview	0	0	116	NaN%	NaN	0
Meta pathway lipodystrophy, dyslipidemia and hyperlipidemia	0	0	13	NaN%	NaN	0
Mitochondrial complex I inhibition leading to chemical-induced Fanconi syndrome	0	0	21	NaN%	NaN	0
Modified nucleosides derived from tRNA as urinary cancer markers	0	0	21	NaN%	NaN	0
Ophthalmate biosynthesis in hepatocytes	0	0	10	NaN%	NaN	0
Phosphatidylcholine catabolism	0	0	32	NaN%	NaN	0
Role of carnosine in muscle contraction	0	0	14	NaN%	NaN	0

## Sheet: THP1_RIVM2_adjPvalue020
Statistics results for Fri Dec 10 19:17:33 CET 2021
Dataset: J:\FHML_TGX\Danyel.Jennen\ProjectFolder\Projects\Filler-project\THP1_RIVM\pathvisio\noflags\THP1_RIVM_BioAlcamid_limma_OUTPUT_TABLE.pgex
Pathway directory: D:\wikipathways-20211110-gpml-Homo_sapiens
Gene database: D:\pathvisio-3.3.0\Hs_Derby_Ensembl_91.bridge
Criterion: [RIVM2_adj.P.Val] < 0.2
Calculation method: pathway-centric. Calculations are performed after mapping data to pathways.
Total data points (N): 8427
Data points meeting criterion (R): 672
Pathway	positive (r)	measured (n)	total	%	Z Score	p-value (permuted)
Retinoblastoma gene in cancer	41	81	98	0.5062	14.24	0
DNA replication	21	38	50	0.5526	10.78	0
G1 to S cell cycle control	21	59	68	0.3559	7.86	0
Cell cycle	26	107	124	0.243	6.27	0
DNA mismatch repair	8	22	25	0.3636	4.92	0
DNA IR-damage and cellular response via ATR	17	72	90	0.2361	4.92	0.001
Disorders of folate metabolism and transport	5	10	46	0.5	4.91	0
Gastric cancer network 1	8	25	30	0.32	4.44	0.001
Pyrimidine metabolism	16	76	140	0.2105	4.23	0
ATM signaling pathway	10	38	50	0.2632	4.18	0.001
Nucleotide excision repair in xeroderma pigmentosum	13	57	62	0.2281	4.15	0
DNA repair pathways, full network	20	108	125	0.1852	4.07	0
One-carbon metabolism	7	23	58	0.3043	3.98	0
Fluoropyrimidine activity	8	29	58	0.2759	3.91	0.002
Nucleotide excision repair	10	41	44	0.2439	3.89	0
Regulation of sister chromatid separation at the metaphase-anaphase transition	5	14	16	0.3571	3.83	0.002
Pentose phosphate metabolism	3	6	21	0.5	3.8	0.001
Gastric cancer network 2	7	25	33	0.28	3.7	0.002
miRNA regulation of DNA damage response	13	68	106	0.1912	3.41	0.002
FABP4 in ovarian cancer	1	1	3	1	3.4	0.005
ID signaling pathway	4	12	17	0.3333	3.24	0.01
Antiviral and anti-inflammatory effects of Nrf2 on SARS-CoV-2 pathway	6	25	50	0.24	2.96	0.005
DNA damage response	11	61	78	0.1803	2.91	0.003
Hepatitis C and hepatocellular carcinoma	9	46	63	0.1957	2.91	0.001
MFAP5-mediated ovarian cancer cell motility and invasiveness	3	9	18	0.3333	2.81	0.007
Vitamin B12 disorders	3	9	36	0.3333	2.81	0.011
miRNAs involved in DNA damage response	6	27	70	0.2222	2.74	0.006
Folate metabolism	8	41	142	0.1951	2.73	0.007
Matrix metalloproteinases	5	21	31	0.2381	2.68	0.018
Pluripotent stem cell differentiation pathway	5	21	64	0.2381	2.68	0.008
Transcriptional activation by NRF2 in response to phytochemicals	4	15	20	0.2667	2.67	0.011
miR-517 relationship with ARCN1 and USP1	2	5	7	0.4	2.64	0.017
Osteoblast signaling	2	5	18	0.4	2.64	0.006
Photodynamic therapy-induced NFE2L2 (NRF2) survival signaling	5	22	24	0.2273	2.56	0.021
Serine metabolism	2	6	43	0.3333	2.29	0.025
4-hydroxytamoxifen, Dexamethasone, and Retinoic Acids Regulation of p27 Expression	4	18	31	0.2222	2.23	0.029
Effect of progerin on genes involved in Hutchinson-Gilford progeria syndrome	5	25	30	0.2	2.22	0.028
Hypoxia-mediated EMT and stemness	1	2	6	0.5	2.19	0.03
Tyrosine metabolism	1	2	27	0.5	2.19	0.024
Ultraconserved region 339 modulation of tumor suppressor microRNAs in cancer	1	2	6	0.5	2.19	0.024
Homologous recombination	3	12	14	0.25	2.18	0.042
FBXL10 enhancement of MAP/ERK signaling in diffuse large B-cell lymphoma	6	33	36	0.1818	2.17	0.031
Trans-sulfuration and one-carbon metabolism	5	26	66	0.1923	2.12	0.026
Nucleotide metabolism	4	19	37	0.2105	2.11	0.028
Integrated cancer pathway	7	42	50	0.1667	2.08	0.039
Selenium micronutrient network	9	60	198	0.15	2.02	0.037
ATR signaling	2	7	10	0.2857	2.01	0.051
Cerebral organic acidurias, including diseases	2	7	46	0.2857	2.01	0.03
COVID-19 adverse outcome pathway	2	7	24	0.2857	2.01	0.042
Farnesoid X receptor pathway	2	7	21	0.2857	2.01	0.045
Interactions between LOXL4 and oxidative stress pathway	3	13	19	0.2308	2.01	0.058
Pyrimidine metabolism and related diseases	3	13	97	0.2308	2.01	0.036
Hair follicle development: organogenesis - part 2 of 3	4	20	36	0.2	1.99	0.041
Malignant pleural mesothelioma	34	310	468	0.1097	1.98	0.058
Burn wound healing	10	72	124	0.1389	1.86	0.052
Biomarkers for pyrimidine metabolism disorders	3	14	88	0.2143	1.86	0.061
Overview of proinflammatory and profibrotic mediators	8	55	134	0.1455	1.8	0.067
Histone modifications	9	64	68	0.1406	1.8	0.054
Hippo-Merlin signaling dysregulation	11	83	121	0.1325	1.78	0.073
Acquired partial lipodystrophy / Barraquer-Simons syndrome	2	8	17	0.25	1.78	0.059
Macrophage markers	2	8	10	0.25	1.78	0.054
Thiamine metabolic pathways	2	8	34	0.25	1.78	0.058
Cardiac progenitor differentiation	4	23	56	0.1739	1.67	0.072
NRF2-ARE regulation	4	23	24	0.1739	1.67	0.077
Vitamins A and D - action mechanisms	1	3	14	0.3333	1.62	0.072
Vitamin B6-dependent and responsive disorders	1	3	29	0.3333	1.62	0.073
Regulatory circuits of the STAT3 signaling pathway	8	59	79	0.1356	1.59	0.105
Cori cycle	2	9	53	0.2222	1.58	0.079
Nucleotide GPCRs	2	9	15	0.2222	1.58	0.088
Tryptophan metabolism	4	24	140	0.1667	1.57	0.1
Oncostatin M signaling pathway	8	61	66	0.1311	1.49	0.151
Eicosanoid synthesis	3	17	57	0.1765	1.47	0.157
Selective expression of chemokine receptors during T-cell polarization	3	17	30	0.1765	1.47	0.088
Metabolic reprogramming in colon cancer	5	34	80	0.1471	1.45	0.129
IL-18 signaling pathway	23	217	288	0.106	1.45	0.165
Cells and molecules involved in local acute inflammatory response	2	10	19	0.2	1.4	0.095
Iron metabolism in placenta	2	10	15	0.2	1.4	0.077
Phosphodiesterases in neuronal function	4	26	66	0.1538	1.4	0.18
Imatinib and chronic myeloid leukemia	3	18	25	0.1667	1.36	0.103
Urea cycle and metabolism of amino groups	3	18	71	0.1667	1.36	0.168
DNA IR-double strand breaks and cellular response via ATM	7	54	65	0.1296	1.36	0.168
Benzene metabolism	1	4	17	0.25	1.26	0.114
Ketone bodies synthesis and degradation	1	4	13	0.25	1.26	0.088
Metabolism of alpha-linolenic acid	1	4	27	0.25	1.26	0.104
SCFA and skeletal muscle substrate metabolism	1	4	17	0.25	1.26	0.119
Serotonin receptor 2 and STAT3 signaling	1	4	6	0.25	1.26	0.137
Sulindac metabolic pathway	1	4	11	0.25	1.26	0.097
Fatty acid transporters	2	11	28	0.1818	1.25	0.096
Notch signaling	5	37	48	0.1351	1.25	0.265
Microtubule cytoskeleton regulation	5	38	47	0.1316	1.18	0.28
Physiological and pathological hypertrophy of the heart	3	20	27	0.15	1.16	0.186
Orexin receptor pathway	11	99	225	0.1111	1.16	0.254
Hippo signaling regulation pathways	8	68	104	0.1176	1.16	0.269
One-carbon metabolism and related pathways	5	39	94	0.1282	1.12	0.259
ncRNAs involved in STAT3 signaling in hepatocellular carcinoma	2	12	19	0.1667	1.11	0.164
Glioblastoma signaling pathways	8	70	88	0.1143	1.07	0.295
Wnt signaling pathway and pluripotency	8	70	106	0.1143	1.07	0.26
Ethanol effects on histone modifications	3	21	53	0.1429	1.07	0.249
Nuclear receptors in lipid metabolism and toxicity	3	21	48	0.1429	1.07	0.292
Vitamin D in inflammatory diseases	3	21	25	0.1429	1.07	0.228
Breast cancer pathway	12	113	167	0.1062	1.04	0.3
Apoptosis-related network due to altered Notch3 in ovarian cancer	6	51	54	0.1176	1	0.291
TYROBP causal network in microglia	6	51	61	0.1176	1	0.295
Ferroptosis	5	41	88	0.122	1	0.282
Caloric restriction and aging	1	5	13	0.2	0.99	0.13
Folate-alcohol and cancer pathway hypotheses	1	5	24	0.2	0.99	0.333
Hfe effect on hepcidin production	1	5	8	0.2	0.99	0.177
Amplification and expansion of oncogenic pathways as metastatic traits	2	13	18	0.1538	0.99	0.173
Globo sphingolipid metabolism	2	13	28	0.1538	0.99	0.392
Regulation of Wnt / B-catenin signaling by small molecule compounds	2	13	33	0.1538	0.99	0.421
Prostaglandin and leukotriene metabolism in senescence	3	22	57	0.1364	0.98	0.303
Purinergic signaling	3	22	96	0.1364	0.98	0.306
Cohesin complex - Cornelia de Lange syndrome	4	32	37	0.125	0.95	0.4
Interleukin-1 (IL-1) structural pathway	5	43	52	0.1163	0.89	0.359
Kallmann syndrome	2	14	40	0.1429	0.87	0.399
MFAP5 effect on permeability and motility of endothelial cells via cytoskeleton rearrangement	2	14	20	0.1429	0.87	0.443
Riboflavin and CoQ disorders	2	14	59	0.1429	0.87	0.391
TGF-beta signaling in thyroid cells for epithelial-mesenchymal transition	2	14	20	0.1429	0.87	0.447
Complement system	7	65	143	0.1077	0.83	0.405
GPCRs, class A rhodopsin-like	10	98	272	0.102	0.82	0.462
Biomarkers for urea cycle disorders	1	6	51	0.1667	0.79	0.415
Estrogen metabolism	1	6	45	0.1667	0.79	0.401
exRNA mechanism of action and biogenesis	1	6	8	0.1667	0.79	0.225
Spinal cord injury	8	77	127	0.1039	0.79	0.407
7q11.23 copy number variation syndrome	9	88	149	0.1023	0.78	0.431
GPCRs, other	5	45	114	0.1111	0.78	0.43
PPAR signaling pathway	5	45	76	0.1111	0.78	0.399
Glutathione metabolism	2	15	57	0.1333	0.77	0.467
Male infertility	9	89	150	0.1011	0.75	0.407
Fatty acid beta-oxidation	3	25	71	0.12	0.74	0.495
Integrated breast cancer pathway	14	147	200	0.0952	0.7	0.467
Envelope proteins and their potential roles in EDMD physiopathology	4	36	47	0.1111	0.7	0.452
Netrin-UNC5B signaling pathway	4	36	53	0.1111	0.7	0.508
Hair follicle development: cytodifferentiation - part 3 of 3	5	47	93	0.1064	0.68	0.515
Oxidative stress response	3	26	35	0.1154	0.67	0.468
Vitamin D-sensitive calcium signaling in depression	3	26	55	0.1154	0.67	0.539
Hypertrophy model	2	16	21	0.125	0.67	0.644
Adipogenesis	9	92	132	0.0978	0.64	0.507
Senescence and autophagy in cancer	9	92	112	0.0978	0.64	0.534
Wnt signaling	8	81	121	0.0988	0.63	0.52
IL-1 signaling pathway	5	48	57	0.1042	0.63	0.606
ncRNAs involved in Wnt signaling in hepatocellular carcinoma	6	59	96	0.1017	0.62	0.57
Cellular proteostasis	1	7	15	0.1429	0.62	0.717
Drug induction of bile acid pathway	1	7	45	0.1429	0.62	0.53
EV release from cardiac cells and their functional effects	1	7	17	0.1429	0.62	0.69
Serotonin transporter activity	1	7	15	0.1429	0.62	0.719
Sulfation biotransformation reaction	1	7	29	0.1429	0.62	0.578
Valproic acid pathway	1	7	36	0.1429	0.62	0.481
Vitamin D metabolism	1	7	22	0.1429	0.62	0.643
Base excision repair	3	27	32	0.1111	0.6	0.53
Photodynamic therapy-induced NF-kB survival signaling	3	27	36	0.1111	0.6	0.544
Signal transduction through IL1R	3	27	34	0.1111	0.6	0.536
Angiogenesis	2	17	25	0.1176	0.58	0.621
Eicosanoid metabolism via lipooxygenases (LOX)	2	17	70	0.1176	0.58	0.571
Methionine de novo and salvage pathway	2	17	74	0.1176	0.58	0.584
Purine metabolism and related disorders	2	17	139	0.1176	0.58	0.561
Notch signaling pathway (Netpath)	5	50	62	0.1	0.53	0.618
IL1 and megakaryocytes in obesity	2	18	26	0.1111	0.49	0.599
Urea cycle and associated pathways	2	18	81	0.1111	0.49	0.638
Alanine and aspartate metabolism	1	8	66	0.125	0.47	0.615
BMP2-WNT4-FOXO1 pathway in primary endometrial stromal cell differentiation	1	8	16	0.125	0.47	0.799
Dopamine metabolism	1	8	48	0.125	0.47	0.662
Dual hijack model of Vif in HIV infection	1	8	10	0.125	0.47	0.929
Ethanol metabolism production of ROS by CYP2E1	1	8	28	0.125	0.47	0.606
IL-10 anti-inflammatory signaling pathway	1	8	19	0.125	0.47	0.719
Interleukin-1 induced activation of NF-kB	1	8	13	0.125	0.47	0.904
Ketogenesis and ketolysis	1	8	27	0.125	0.47	0.622
LDLRAD4 and what we know about it	1	8	12	0.125	0.47	0.907
Serotonin and anxiety-related events	1	8	16	0.125	0.47	0.802
Transcription factors regulate miRNAs related to cardiac hypertrophy	1	8	16	0.125	0.47	0.791
MAPK cascade	3	29	37	0.1034	0.47	0.628
Vitamin B12 metabolism	3	29	118	0.1034	0.47	0.635
Translation inhibitors in chronically activated PDGFRA cells	4	41	49	0.0976	0.42	0.719
G13 signaling pathway	3	30	39	0.1	0.41	0.712
Neovascularisation processes	3	30	42	0.1	0.41	0.725
ATM signaling in development and disease	4	42	49	0.0952	0.37	0.729
Endochondral ossification with skeletal dysplasias	4	42	69	0.0952	0.37	0.7
Endochondral ossification	4	42	69	0.0952	0.37	0.7
Mammary gland development pathway - Involution (Stage 4 of 4)	1	9	13	0.1111	0.35	0.954
Methionine metabolism leading to sulfur amino acids and related disorders	1	9	46	0.1111	0.35	0.745
NAD metabolism, sirtuins and aging	1	9	16	0.1111	0.35	0.873
Nanomaterial-induced inflammasome activation	1	9	13	0.1111	0.35	0.964
Nicotine effect on dopaminergic neurons	1	9	31	0.1111	0.35	0.674
Estrogen signaling pathway	2	20	26	0.1	0.33	0.66
NAD metabolism in oncogene-induced senescence and mitochondrial dysfunction-associated senescence	2	20	46	0.1	0.33	0.733
Statin inhibition of cholesterol production	2	20	50	0.1	0.33	0.746
Wnt signaling pathway	4	43	52	0.093	0.32	0.743
Hippo-Yap signaling pathway	2	21	24	0.0952	0.26	0.727
Monoamine transport	2	21	47	0.0952	0.26	0.783
TGF-beta signaling pathway	10	116	133	0.0862	0.26	0.815
Host-pathogen interaction of human coronaviruses - MAPK signaling	3	33	43	0.0909	0.24	0.863
Autosomal recessive osteopetrosis pathways	1	10	14	0.1	0.24	0.973
Blood clotting cascade	1	10	27	0.1	0.24	0.707
Estrogen receptor pathway	1	10	16	0.1	0.24	0.945
FOXP3 in COVID-19	1	10	19	0.1	0.24	0.833
Genes associated with the development of rheumatoid arthritis	1	10	22	0.1	0.24	0.774
lncRNA-mediated mechanisms of therapeutic resistance	1	10	14	0.1	0.24	0.969
Major receptors targeted by epinephrine and norepinephrine	1	10	34	0.1	0.24	0.838
Osteoclast signaling	1	10	21	0.1	0.24	0.791
SMC1/SMC3 role in DNA damage - Cornelia de Lange Syndrome	1	10	12	0.1	0.24	0.988
Trans-sulfuration pathway	1	10	25	0.1	0.24	0.681
TGF-beta receptor signaling in skeletal dysplasias	4	45	60	0.0889	0.23	0.837
p53 transcriptional gene network	5	57	78	0.0877	0.22	0.819
Thyroid stimulating hormone (TSH) signaling pathway	5	57	67	0.0877	0.22	0.847
Prostaglandin signaling	2	22	40	0.0909	0.19	0.884
Network map of SARS-CoV-2 signaling pathway	13	155	324	0.0839	0.19	0.862
Parkinson's disease pathway	3	34	84	0.0882	0.18	0.83
3q29 copy number variation syndrome	5	59	115	0.0847	0.14	0.892
Complement activation	1	11	24	0.0909	0.14	0.785
Development of pulmonary dendritic cells and macrophage subsets	1	11	14	0.0909	0.14	0.994
Galanin receptor pathway	1	11	22	0.0909	0.14	0.818
Glycolysis in senescence	1	11	26	0.0909	0.14	0.777
Nitric oxide metabolism in cystic fibrosis	1	11	25	0.0909	0.14	0.802
OSX and miRNAs in tooth development	1	11	39	0.0909	0.14	0.937
Purine metabolism	1	11	94	0.0909	0.14	0.898
Nephrotic syndrome	3	35	49	0.0857	0.13	0.859
Canonical and non-canonical Notch signaling	2	23	31	0.087	0.13	0.868
Apoptosis	6	72	88	0.0833	0.11	0.918
Primary focal segmental glomerulosclerosis (FSGS)	5	60	77	0.0833	0.1	0.92
NRF2 pathway	8	97	145	0.0825	0.1	0.933
Physico-chemical features and toxicity-associated pathways	4	48	78	0.0833	0.09	0.899
Vitamin D receptor pathway	9	110	188	0.0818	0.08	0.933
Lung fibrosis	3	36	85	0.0833	0.08	0.919
Mechanoregulation and pathology of YAP/TAZ via Hippo and non-Hippo mechanisms	3	36	47	0.0833	0.08	0.92
Complement system in neuronal development and plasticity	6	73	137	0.0822	0.08	0.947
Embryonic stem cell pluripotency pathways	6	73	123	0.0822	0.08	0.949
16p11.2 distal deletion syndrome	2	24	46	0.0833	0.07	0.914
Type I collagen synthesis in the context of osteogenesis imperfecta	2	24	36	0.0833	0.07	0.963
Wnt signaling in kidney disease	2	24	39	0.0833	0.07	0.969
Allograft Rejection	4	49	113	0.0816	0.05	0.943
Overlap between signal transduction pathways contributing to LMNA laminopathies	4	49	73	0.0816	0.05	0.963
BMP signaling in eyelid development	1	12	23	0.0833	0.05	0.897
Canonical and non-canonical TGF-B signaling	1	12	18	0.0833	0.05	0.971
Deregulation of Rab and Rab effector genes in bladder cancer	1	12	17	0.0833	0.05	0.984
Development and heterogeneity of the ILC family	1	12	33	0.0833	0.05	0.94
Glycosaminoglycan degradation	1	12	45	0.0833	0.05	0.979
Metabolic pathway of LDL, HDL and TG, including diseases	1	12	34	0.0833	0.05	0.96
Serotonin and anxiety	1	12	22	0.0833	0.05	0.902
Thyroid hormones production and peripheral downstream signaling effects	6	74	134	0.0811	0.04	0.967
Endoderm differentiation	8	100	147	0.08	0.01	0.986
MECP2 and associated Rett syndrome	4	50	114	0.08	0.01	0.993
Common pathways underlying drug addiction	2	25	50	0.08	0	0.973
Interactions of natural killer cells in pancreatic cancer	2	25	43	0.08	0	0.983
Sphingolipid metabolism in senescence	2	25	49	0.08	0	0.967
Cholesterol biosynthesis pathway	1	13	32	0.0769	-0.04	0.967
H19 action Rb-E2F1 signaling and CDK-Beta-catenin activity	1	13	17	0.0769	-0.04	0.992
Mitochondrial gene expression	1	13	23	0.0769	-0.04	0.956
MYD88 distinct input-output pathway	1	13	20	0.0769	-0.04	0.972
NAD+ metabolism	1	13	34	0.0769	-0.04	0.973
Neuroinflammation	1	13	31	0.0769	-0.04	0.963
Osteopontin signaling	1	13	14	0.0769	-0.04	0.999
TCA cycle and deficiency of pyruvate dehydrogenase complex (PDHc)	1	13	37	0.0769	-0.04	0.984
lncRNA in canonical Wnt signaling and colorectal cancer	5	64	102	0.0781	-0.05	0.967
CAMKK2 pathway	2	26	143	0.0769	-0.05	0.963
Prion disease pathway	2	26	36	0.0769	-0.05	0.97
Kit receptor signaling pathway	4	52	60	0.0769	-0.08	0.957
Familial partial lipodystrophy (FPLD)	2	27	44	0.0741	-0.11	0.939
Peptide GPCRs	2	27	79	0.0741	-0.11	0.914
Cysteine and methionine catabolism	1	14	74	0.0714	-0.11	0.909
Extracellular vesicles in the crosstalk of cardiac cells	1	14	30	0.0714	-0.11	0.881
FOXA2 pathway	1	14	23	0.0714	-0.11	0.86
MAP3K1 role in promoting and blocking gonadal determination	1	14	18	0.0714	-0.11	0.964
MAPK pathway in congenital thyroid cancer	1	14	19	0.0714	-0.11	0.938
Metabolism of spingolipids in ER and Golgi apparatus	1	14	72	0.0714	-0.11	0.915
nsp1 from SARS-CoV-2 inhibits translation initiation in the host cell	1	14	21	0.0714	-0.11	0.918
SREBF and miR33 in cholesterol and lipid homeostasis	1	14	19	0.0714	-0.11	0.942
Neural crest differentiation	4	54	102	0.0741	-0.15	0.859
16p11.2 proximal deletion syndrome	5	67	152	0.0746	-0.16	0.858
Oxysterols derived from cholesterol	2	28	112	0.0714	-0.16	0.853
Monoamine GPCRs	1	15	43	0.0667	-0.19	0.891
Overview of nanoparticle effects	1	15	42	0.0667	-0.19	0.927
Pathways of nucleic acid metabolism and innate immune sensing	1	15	39	0.0667	-0.19	0.922
PI3K/AKT/mTOR - VitD3 signaling	1	15	34	0.0667	-0.19	0.855
Aryl hydrocarbon receptor Netpath	3	42	57	0.0714	-0.2	0.818
TGF-beta receptor signaling	3	42	56	0.0714	-0.2	0.828
Factors and pathways affecting insulin-like growth factor (IGF1)-Akt signaling	2	29	43	0.069	-0.21	0.865
Non-genomic actions of 1,25 dihydroxyvitamin D3	4	56	97	0.0714	-0.23	0.82
Cancer immunotherapy by PD-1 blockade	1	16	35	0.0625	-0.25	0.809
Cell differentiation - expanded index	1	16	69	0.0625	-0.25	0.83
miRNA targets in ECM and membrane receptors	1	16	46	0.0625	-0.25	0.816
Ovarian infertility	1	16	33	0.0625	-0.25	0.781
Overview of interferons-mediated signaling pathway	1	16	38	0.0625	-0.25	0.85
Serotonin receptor 2 and ELK-SRF/GATA4 signaling	1	16	24	0.0625	-0.25	0.728
EGFR tyrosine kinase inhibitor resistance	5	70	92	0.0714	-0.26	0.797
Aryl hydrocarbon receptor pathway	2	30	49	0.0667	-0.26	0.764
Hepatocyte growth factor receptor signaling	2	30	35	0.0667	-0.26	0.79
Pathways affected in adenoid cystic carcinoma	4	57	72	0.0702	-0.27	0.823
Mesodermal commitment pathway	7	97	154	0.0722	-0.28	0.78
TNF-alpha signaling pathway	6	84	97	0.0714	-0.28	0.769
Aripiprazole metabolic pathway	0	1	7	0	-0.29	0.914
Caffeine and theobromine metabolism	0	1	18	0	-0.29	0.877
Catalytic cycle of mammalian flavin-containing monooxygenases (FMOs)	0	1	14	0	-0.29	0.971
COVID-19, thrombosis and anticoagulation	0	1	27	0	-0.29	0.691
Diclofenac metabolic pathway	0	1	12	0	-0.29	0.993
Downregulation of ACE2 expression by SARS-CoV infection and SARS-CoV spike protein	0	1	8	0	-0.29	0.955
Evolocumab mechanism to reduce LDL cholesterol	0	1	5	0	-0.29	0.813
Hormonal control of pubertal growth spurt	0	1	8	0	-0.29	0.964
Hypothetical craniofacial development pathway	0	1	11	0	-0.29	0.988
Influenza A virus infection	0	1	16	0	-0.29	0.936
Model for regulation of MSMP expression in cancer cells and its proangiogenic role in ovarian tumors	0	1	6	0	-0.29	0.881
Nicotine metabolism in liver cells	0	1	18	0	-0.29	0.856
PCSK9-mediated LDL receptor degradation	0	1	3	0	-0.29	0.507
Soluble ACE2-mediated cell entry of SARS-CoV-2	0	1	7	0	-0.29	0.912
Melanoma	4	58	78	0.069	-0.3	0.759
Thermogenesis	6	85	140	0.0706	-0.31	0.754
Complement and coagulation cascades	2	31	63	0.0645	-0.31	0.737
Overview of leukocyte-intrinsic Hippo pathway functions	2	31	37	0.0645	-0.31	0.827
Oxidative damage response	2	31	44	0.0645	-0.31	0.813
Photodynamic therapy-induced HIF-1 survival signaling	2	31	38	0.0645	-0.31	0.808
TCA cycle (aka Krebs or citric acid cycle)	1	17	49	0.0588	-0.32	0.756
Transcription co-factors SKI and SKIL protein partners	1	17	19	0.0588	-0.32	0.823
Integrin-mediated cell adhesion	6	86	102	0.0698	-0.34	0.767
Fibrin complement receptor 3 signaling pathway	2	32	47	0.0625	-0.36	0.751
Influence of laminopathies on Wnt signaling	2	32	45	0.0625	-0.36	0.749
Pre-implantation embryo	2	32	60	0.0625	-0.36	0.693
RANKL/RANK signaling pathway	3	46	58	0.0652	-0.36	0.723
Parkin-ubiquitin proteasomal system pathway	4	60	75	0.0667	-0.38	0.716
MAPK signaling pathway	13	180	258	0.0722	-0.38	0.702
Fatty acid biosynthesis	1	18	43	0.0556	-0.38	0.72
Inhibition of exosome biogenesis and secretion by Manumycin A in CRPC cells	1	18	19	0.0556	-0.38	0.752
PPAR-alpha pathway	1	18	28	0.0556	-0.38	0.647
Wnt/beta-catenin signaling pathway in leukemia	1	18	29	0.0556	-0.38	0.634
Genes related to primary cilium development (based on CRISPR)	6	88	104	0.0682	-0.4	0.716
Microglia pathogen phagocytosis pathway	2	33	44	0.0606	-0.41	0.704
miRNAs involvement in the immune response in sepsis	2	33	69	0.0606	-0.41	0.705
Synaptic vesicle pathway	2	33	59	0.0606	-0.41	0.668
AGE/RAGE pathway	4	61	67	0.0656	-0.41	0.698
Joubert syndrome	4	61	87	0.0656	-0.41	0.674
Amino acid metabolism pathway excerpt: histidine catabolism extension	0	2	23	0	-0.42	0.695
Biosynthesis and regeneration of tetrahydrobiopterin and catabolism of phenylalanine	0	2	38	0	-0.42	0.657
Butyrate-induced histone acetylation	0	2	11	0	-0.42	0.946
Gastric acid production	0	2	22	0	-0.42	0.683
Heroin metabolism	0	2	8	0	-0.42	0.854
HIPK2 in kidney fibrosis	0	2	8	0	-0.42	0.867
Mevalonate arm of cholesterol biosynthesis pathway with inhibitors	0	2	64	0	-0.42	0.652
Neurotransmitter disorders	0	2	27	0	-0.42	0.651
Nicotine effect on chromaffin cells	0	2	10	0	-0.42	0.937
Polyol pathway	0	2	17	0	-0.42	0.819
Secretion of hydrochloric acid in parietal cells	0	2	15	0	-0.42	0.889
Tamoxifen metabolism	0	2	37	0	-0.42	0.661
ErbB signaling pathway	5	75	101	0.0667	-0.42	0.687
1q21.1 copy number variation syndrome	1	19	58	0.0526	-0.44	0.654
NAD+ biosynthetic pathways	1	19	37	0.0526	-0.44	0.621
Progeria-associated lipodystrophy	1	19	36	0.0526	-0.44	0.627
RAS and bradykinin pathways in COVID-19	1	19	51	0.0526	-0.44	0.674
Toll-like receptor signaling pathway	5	76	117	0.0658	-0.45	0.658
CCL18 signaling pathway	2	34	177	0.0588	-0.45	0.664
PDGF pathway	2	34	53	0.0588	-0.45	0.662
Interferon type I signaling pathways	3	49	57	0.0612	-0.48	0.619
Host-pathogen interaction of human coronaviruses - apoptosis	1	20	34	0.05	-0.49	0.584
MTHFR deficiency	1	20	60	0.05	-0.49	0.608
Nanoparticle triggered autophagic cell death	1	20	30	0.05	-0.49	0.599
Striated muscle contraction pathway	1	20	39	0.05	-0.49	0.611
Eukaryotic transcription initiation	2	35	42	0.0571	-0.49	0.616
Arylamine metabolism	0	3	13	0	-0.51	0.851
Conversion of angiotensinogen to angiotensin II	0	3	9	0	-0.51	0.757
Direct reversal repair	0	3	4	0	-0.51	0.18
eIF5A regulation in response to inhibition of the nuclear export system	0	3	6	0	-0.51	0.397
Ethylmalonic encephalopathy	0	3	20	0	-0.51	0.676
Fatty acid omega-oxidation	0	3	20	0	-0.51	0.674
GABA metabolism (aka GHB)	0	3	42	0	-0.51	0.58
Glycine metabolism	0	3	19	0	-0.51	0.72
MED and pseudoachondroplasia genes	0	3	7	0	-0.51	0.563
MicroRNA network associated with chronic lymphocytic leukemia	0	3	10	0	-0.51	0.825
Oxytocin signaling	0	3	10	0	-0.51	0.826
SARS-CoV-2 altering angiogenesis via NRP1	0	3	11	0	-0.51	0.868
SARS-CoV-2 and angiotensin-converting enzyme 2 receptor: molecular mechanisms	0	3	14	0	-0.51	0.86
Somitogenesis in the context of spondylocostal dysostosis	0	3	10	0	-0.51	0.827
Thyroxine (thyroid hormone) production	0	3	12	0	-0.51	0.864
SARS-CoV-2 innate immunity evasion and cell-specific immune response	3	50	92	0.06	-0.52	0.593
Bladder cancer	2	36	47	0.0556	-0.54	0.635
Cholesterol metabolism with Bloch and Kandutsch-Russell pathways	2	36	97	0.0556	-0.54	0.574
Proximal tubule transport	2	36	86	0.0556	-0.54	0.615
Small cell lung cancer	5	79	104	0.0633	-0.54	0.588
T cell receptor and co-stimulatory signaling	1	21	45	0.0476	-0.54	0.572
Nuclear receptors meta-pathway	15	215	339	0.0698	-0.55	0.561
Ciliary landscape	13	189	215	0.0688	-0.56	0.573
VEGFA-VEGFR2 signaling pathway	26	362	436	0.0718	-0.57	0.568
Chromosomal and microsatellite instability in colorectal cancer	4	66	81	0.0606	-0.58	0.571
Phosphoinositides metabolism	2	37	89	0.0541	-0.58	0.588
Aflatoxin B1 metabolism	0	4	16	0	-0.59	0.741
Control of immune tolerance by vasoactive intestinal peptide	0	4	16	0	-0.59	0.773
Eicosanoid metabolism via cytochrome P450 monooxygenases (CYP) pathway	0	4	23	0	-0.59	0.619
Glial cell differentiation	0	4	9	0	-0.59	0.542
let-7 inhibition of ES cell reprogramming	0	4	17	0	-0.59	0.736
Linoleic acid metabolism affected by coronavirus infection	0	4	28	0	-0.59	0.59
miR-222 in exercise-induced cardiac growth	0	4	5	0	-0.59	0.17
Peroxiredoxin 2 induced ovarian failure	0	4	13	0	-0.59	0.801
Peroxisomal beta-oxidation of tetracosanoyl-CoA	0	4	17	0	-0.59	0.746
Robo4 and VEGF signaling pathways crosstalk	0	4	7	0	-0.59	0.364
Tgif disruption of Shh signaling	0	4	10	0	-0.59	0.655
Cell migration and invasion through p75NTR	1	22	31	0.0455	-0.59	0.574
Ebstein-Barr virus LMP1 signaling	1	22	25	0.0455	-0.59	0.626
DNA damage response (only ATM dependent)	6	95	118	0.0632	-0.6	0.552
Epithelial to mesenchymal transition in colorectal cancer	7	109	163	0.0642	-0.6	0.555
Fas ligand pathway and stress induction of heat shock proteins	2	38	48	0.0526	-0.62	0.583
Prader-Willi and Angelman syndrome	2	38	90	0.0526	-0.62	0.552
Genotoxicity pathway	3	53	65	0.0566	-0.62	0.529
Glucocorticoid receptor pathway	3	53	73	0.0566	-0.62	0.524
Calcium regulation in cardiac cells	6	96	167	0.0625	-0.63	0.562
Brain-derived neurotrophic factor (BDNF) signaling pathway	7	110	150	0.0636	-0.63	0.526
Apoptosis modulation and signaling	5	82	97	0.061	-0.63	0.523
Focal adhesion	10	152	201	0.0658	-0.64	0.555
7-oxo-C and 7-beta-HC pathways	1	23	60	0.0435	-0.64	0.571
Endothelin pathways	1	23	48	0.0435	-0.64	0.519
Follicle stimulating hormone (FSH) signaling pathway	1	23	28	0.0435	-0.64	0.592
Genes controlling nephrogenesis	1	23	45	0.0435	-0.64	0.474
Immune response to tuberculosis	1	23	24	0.0435	-0.64	0.598
Intraflagellar transport proteins binding to dynein	1	23	28	0.0435	-0.64	0.599
Nuclear receptors	1	23	44	0.0435	-0.64	0.472
Relationship between inflammation, COX-2 and EGFR	1	23	29	0.0435	-0.64	0.591
TNF-related weak inducer of apoptosis (TWEAK) signaling pathway	2	39	45	0.0513	-0.66	0.5
Arachidonate epoxygenase / epoxide hydrolase	0	5	18	0	-0.66	0.691
Benzo(a)pyrene metabolism	0	5	17	0	-0.66	0.638
Cell-type dependent selectivity of CCK2R signaling	0	5	26	0	-0.66	0.633
Cholesterol biosynthesis with skeletal dysplasias	0	5	23	0	-0.66	0.636
Codeine and morphine metabolism	0	5	25	0	-0.66	0.609
Effects of nitric oxide	0	5	16	0	-0.66	0.66
Fluoroacetic acid toxicity	0	5	16	0	-0.66	0.613
Gamma-glutamyl cycle for the biosynthesis and degradation of glutathione, including diseases	0	5	24	0	-0.66	0.618
HIF1A and PPARG regulation of glycolysis	0	5	19	0	-0.66	0.634
Irinotecan pathway	0	5	18	0	-0.66	0.663
Kinin-Kallikrein pathway	0	5	10	0	-0.66	0.462
Lamin A-processing pathway	0	5	8	0	-0.66	0.324
Methylation pathways	0	5	15	0	-0.66	0.626
mir-124 predicted interactions with cell cycle and differentiation	0	5	8	0	-0.66	0.336
Phase I biotransformations, non P450	0	5	13	0	-0.66	0.626
PTF1A related regulatory pathway	0	5	12	0	-0.66	0.594
Somatic sex determination	0	5	15	0	-0.66	0.63
Somatroph axis (GH) and its relationship to dietary restriction and aging	0	5	12	0	-0.66	0.596
TCA cycle nutrient use and invasiveness of ovarian cancer	0	5	11	0	-0.66	0.512
Sudden infant death syndrome (SIDS) susceptibility pathways	6	98	182	0.0612	-0.68	0.484
IL-17 signaling pathway	1	24	33	0.0417	-0.69	0.495
Mitochondrial immune response to SARS-CoV-2	1	24	62	0.0417	-0.69	0.493
Amino acid metabolism	4	70	205	0.0571	-0.7	0.47
Acetylcholine synthesis	0	6	18	0	-0.72	0.589
Alternative pathway of fetal androgen synthesis	0	6	48	0	-0.72	0.473
Biogenic amine synthesis	0	6	33	0	-0.72	0.503
Degradation pathway of sphingolipids, including diseases	0	6	41	0	-0.72	0.424
FTO obesity variant mechanism	0	6	11	0	-0.72	0.403
Gene regulatory network modelling somitogenesis	0	6	13	0	-0.72	0.488
Glucuronidation	0	6	41	0	-0.72	0.458
Insulin signaling in adipocytes (diabetic condition)	0	6	12	0	-0.72	0.449
Insulin signaling in adipocytes (normal condition)	0	6	15	0	-0.72	0.539
Krebs cycle disorders	0	6	34	0	-0.72	0.492
Lipid particles composition	0	6	21	0	-0.72	0.648
Metastatic brain tumor	0	6	28	0	-0.72	0.581
MicroRNA for targeting cancer growth and vascularization in glioblastoma	0	6	10	0	-0.72	0.338
miRNA biogenesis	0	6	7	0	-0.72	0.232
Mitochondrial fatty acid synthesis pathway	0	6	21	0	-0.72	0.58
Molybdenum cofactor (Moco) biosynthesis	0	6	21	0	-0.72	0.6
Pilocytic astrocytoma	0	6	14	0	-0.72	0.489
SARS-CoV-2 and COVID-19 pathway	0	6	70	0	-0.72	0.456
Steroid biosynthesis	0	6	25	0	-0.72	0.58
Photodynamic therapy-induced unfolded protein response	1	25	28	0.04	-0.73	0.577
Unfolded protein response	1	25	28	0.04	-0.73	0.597
AMP-activated protein kinase (AMPK) signaling	3	57	78	0.0526	-0.76	0.449
RAC1/PAK1/p38/MMP2 pathway	3	57	74	0.0526	-0.76	0.432
MicroRNAs in cardiomyocyte hypertrophy	4	72	109	0.0556	-0.76	0.473
Pathogenic Escherichia coli infection	2	42	79	0.0476	-0.77	0.435
Autophagy	1	26	33	0.0385	-0.78	0.453
Interactions between immune cells and microRNAs in tumor microenvironment	1	26	52	0.0385	-0.78	0.414
Melatonin metabolism and effects	1	26	64	0.0385	-0.78	0.462
ACE inhibitor pathway	0	7	29	0	-0.78	0.524
Activation of NLRP3 inflammasome by SARS-CoV-2	0	7	10	0	-0.78	0.298
Bile acids synthesis and enterohepatic circulation	0	7	18	0	-0.78	0.493
DDX1 as a regulatory component of the Drosha microprocessor	0	7	8	0	-0.78	0.251
EDA signaling in hair follicle development	0	7	15	0	-0.78	0.444
Genes targeted by miRNAs in adipocytes	0	7	19	0	-0.78	0.532
Liver X receptor pathway	0	7	12	0	-0.78	0.306
NIPBL role in DNA damage - Cornelia de Lange syndrome	0	7	9	0	-0.78	0.281
Type III interferon signaling	0	7	11	0	-0.78	0.345
IL-3 signaling pathway	2	43	50	0.0465	-0.81	0.41
22q11.2 copy number variation syndrome	6	103	225	0.0583	-0.81	0.427
BDNF-TrkB signaling	1	27	38	0.037	-0.82	0.422
Glycerophospholipid biosynthetic pathway	1	27	107	0.037	-0.82	0.414
Kisspeptin/kisspeptin receptor system in the ovary	1	27	49	0.037	-0.82	0.362
Proteasome degradation	3	59	67	0.0508	-0.82	0.444
15q11.2 copy number variation syndrome	0	8	13	0	-0.83	0.218
Altered glycosylation of MUC1 in tumor microenvironment	0	8	10	0	-0.83	0.224
Bone morphogenic protein (BMP) signaling and regulation	0	8	13	0	-0.83	0.21
Canonical NF-kB pathway	0	8	9	0	-0.83	0.238
GPCRs, class C metabotropic glutamate, pheromone	0	8	15	0	-0.83	0.278
Hijack of ubiquitination by SARS-CoV-2	0	8	12	0	-0.83	0.224
Inclusion body myositis	0	8	27	0	-0.83	0.545
Leptin and adiponectin	0	8	14	0	-0.83	0.246
Mitochondrial complex II assembly	0	8	10	0	-0.83	0.215
NAD biosynthesis II (from tryptophan)	0	8	34	0	-0.83	0.443
SARS-CoV-2 B.1.1.7 variant antagonises innate immune activation	0	8	15	0	-0.83	0.258
Supression of HMGB1 mediated inflammation by THBD	0	8	10	0	-0.83	0.21
Myometrial relaxation and contraction pathways	6	104	161	0.0577	-0.84	0.396
Renin-angiotensin-aldosterone system (RAAS)	1	28	57	0.0357	-0.86	0.377
Toll-like receptor signaling related to MyD88	1	28	32	0.0357	-0.86	0.473
Insulin signaling	8	134	162	0.0597	-0.86	0.4
PI3K-Akt signaling pathway	14	219	359	0.0639	-0.88	0.389
Arrhythmogenic right ventricular cardiomyopathy	2	45	81	0.0444	-0.88	0.37
Cardiac hypertrophic response	2	45	61	0.0444	-0.88	0.399
T-cell antigen receptor (TCR) pathway during Staphylococcus aureus infection	2	45	70	0.0444	-0.88	0.393
Aerobic glycolysis	0	9	35	0	-0.88	0.424
ApoE and miR-146 in inflammation and atherosclerosis	0	9	13	0	-0.88	0.19
Biotin metabolism, including IEMs	0	9	38	0	-0.88	0.383
Cancer immunotherapy by CTLA4 blockade	0	9	21	0	-0.88	0.407
Classical pathway of steroidogenesis with glucocorticoid and mineralocorticoid metabolism	0	9	73	0	-0.88	0.383
Cytokines and inflammatory response	0	9	32	0	-0.88	0.444
Familial hyperlipidemia type 2	0	9	36	0	-0.88	0.4
Familial hyperlipidemia type 3	0	9	24	0	-0.88	0.445
Familial hyperlipidemia type 5	0	9	28	0	-0.88	0.45
GDNF/RET signaling axis	0	9	24	0	-0.88	0.495
Heme biosynthesis	0	9	28	0	-0.88	0.463
Mammary gland development pathway - Embryonic development (Stage 1 of 4)	0	9	21	0	-0.88	0.411
Nod-like receptor (NLR) signaling pathway	0	9	11	0	-0.88	0.21
Non-homologous end joining	0	9	11	0	-0.88	0.187
NOTCH1 regulation of endothelial cell calcification	0	9	18	0	-0.88	0.317
Omega-9 fatty acid synthesis	0	9	44	0	-0.88	0.368
Alpha 6 beta 4 signaling pathway	1	29	34	0.0345	-0.9	0.45
Neural crest cell migration during development	1	29	40	0.0345	-0.9	0.42
Splicing factor NOVA regulated synaptic proteins	1	29	44	0.0345	-0.9	0.362
Cytoplasmic ribosomal proteins	4	77	89	0.0519	-0.9	0.354
Circadian rhythm genes	8	136	209	0.0588	-0.91	0.352
Non-small cell lung cancer	3	62	88	0.0484	-0.91	0.351
ERK pathway in Huntington's disease	0	10	17	0	-0.93	0.215
Familial hyperlipidemia type 1	0	10	35	0	-0.93	0.407
FGF23 signaling in hypophosphatemic rickets and related disorders	0	10	28	0	-0.93	0.449
GPR40 pathway	0	10	20	0	-0.93	0.307
Hedgehog signaling pathway Netpath	0	10	17	0	-0.93	0.218
Mammary gland development pathway - Puberty (Stage 2 of 4)	0	10	15	0	-0.93	0.179
SRF and miRs in smooth muscle differentiation and proliferation	0	10	18	0	-0.93	0.205
TCA cycle in senescence	0	10	30	0	-0.93	0.457
Hedgehog signaling pathway	1	30	44	0.0333	-0.94	0.357
p38 MAPK signaling pathway	1	30	36	0.0333	-0.94	0.413
Prostaglandin synthesis and regulation	1	30	61	0.0333	-0.94	0.334
Translation factors	2	47	51	0.0426	-0.94	0.318
Pancreatic adenocarcinoma pathway	4	79	97	0.0506	-0.96	0.324
Aspirin and miRNAs	0	11	24	0	-0.98	0.318
Dopaminergic neurogenesis	0	11	32	0	-0.98	0.42
GPCRs, class B secretin-like	0	11	24	0	-0.98	0.348
Leptin-insulin signaling overlap	0	11	20	0	-0.98	0.253
miR-509-3p alteration of YAP1/ECM axis	0	11	19	0	-0.98	0.231
Pathogenesis of SARS-CoV-2 mediated by nsp9-nsp10 complex	0	11	34	0	-0.98	0.407
Transcriptional cascade regulating adipogenesis	0	11	14	0	-0.98	0.183
Amyotrophic lateral sclerosis (ALS)	1	31	56	0.0323	-0.98	0.299
Glycolysis and gluconeogenesis	1	31	69	0.0323	-0.98	0.353
Host-pathogen interaction of human coronaviruses - interferon induction	1	31	47	0.0323	-0.98	0.323
Neural crest cell migration in cancer	1	31	43	0.0323	-0.98	0.38
Angiopoietin-like protein 8 regulatory pathway	6	110	157	0.0545	-0.98	0.328
Head and neck squamous cell carcinoma	3	65	81	0.0462	-1	0.35
Chemokine signaling pathway	7	126	172	0.0556	-1.01	0.321
Glycogen synthesis and degradation	1	32	54	0.0313	-1.01	0.28
Airway smooth muscle cell contraction	0	12	25	0	-1.02	0.304
Differentiation of white and brown adipocyte	0	12	26	0	-1.02	0.32
Ganglio sphingolipid metabolism	0	12	56	0	-1.02	0.262
Kennedy pathway from sphingolipids	0	12	35	0	-1.02	0.366
Mammalian disorder of sexual development	0	12	29	0	-1.02	0.363
MAPK and NFkB signaling pathways inhibited by Yersinia YopJ	0	12	13	0	-1.02	0.119
Mevalonate arm of cholesterol biosynthesis pathway	0	12	55	0	-1.02	0.278
Nanoparticle triggered regulated necrosis	0	12	26	0	-1.02	0.294
Omega-3 / omega-6 fatty acid synthesis	0	12	53	0	-1.02	0.285
RalA downstream regulated genes	0	12	13	0	-1.02	0.132
Small ligand GPCRs	0	12	25	0	-1.02	0.297
Gastrin signaling pathway	5	97	115	0.0515	-1.03	0.308
Androgen receptor signaling pathway	4	82	90	0.0488	-1.04	0.285
B cell receptor signaling pathway	4	82	99	0.0488	-1.04	0.309
Nucleotide-binding oligomerization domain (NOD) pathway	1	33	43	0.0303	-1.05	0.317
Regulation of toll-like receptor signaling pathway	6	113	153	0.0531	-1.05	0.299
Clear cell renal cell carcinoma pathways	3	67	92	0.0448	-1.06	0.276
Cell differentiation - index	0	13	61	0	-1.06	0.279
Familial hyperlipidemia type 4	0	13	36	0	-1.06	0.375
GABA receptor signaling	0	13	57	0	-1.06	0.251
Modulators of TCR signaling and T cell activation	2	51	66	0.0392	-1.07	0.261
EGF/EGFR signaling pathway	8	144	163	0.0556	-1.08	0.269
G protein signaling pathways	3	68	97	0.0441	-1.09	0.262
Mitochondrial complex III assembly	0	14	19	0	-1.1	0.147
Mitochondrial long chain fatty acid beta-oxidation	0	14	24	0	-1.1	0.188
PKC-gamma calcium signaling pathway in ataxia	0	14	29	0	-1.1	0.256
Acute viral myocarditis	3	69	110	0.0435	-1.12	0.267
IL-5 signaling pathway	1	35	41	0.0286	-1.12	0.337
Target of rapamycin (TOR) signaling	1	35	40	0.0286	-1.12	0.337
IL-9 signaling pathway	0	15	18	0	-1.14	0.131
Serotonin receptor 4/6/7 and NR3C signaling	0	15	22	0	-1.14	0.142
Transcription factor regulation in adipogenesis	0	15	24	0	-1.14	0.148
Type II diabetes mellitus	0	15	28	0	-1.14	0.165
Rett syndrome causing genes	1	36	60	0.0278	-1.15	0.227
Endometrial cancer	2	54	77	0.037	-1.16	0.23
T-cell receptor (TCR) signaling pathway	3	71	93	0.0423	-1.17	0.244
Apoptosis modulation by HSP70	0	16	22	0	-1.18	0.14
Interactome of polycomb repressive complex 2 (PRC2)	0	16	17	0	-1.18	0.136
SARS coronavirus and innate immunity	0	16	33	0	-1.18	0.208
IL-2 signaling pathway	1	37	43	0.027	-1.19	0.267
Focal adhesion: PI3K-Akt-mTOR-signaling pathway	12	209	305	0.0574	-1.21	0.227
Congenital generalized lipodystrophy (CGL)	0	17	31	0	-1.21	0.154
Constitutive androstane receptor pathway	0	17	34	0	-1.21	0.181
Inflammatory response pathway	0	17	34	0	-1.21	0.182
Kynurenine pathway and links to cell senescence	0	17	56	0	-1.21	0.244
Nanomaterial induced apoptosis	0	17	31	0	-1.21	0.141
Oligodendrocyte specification and differentiation, leading to myelin components for CNS	0	17	46	0	-1.21	0.259
Pregnane X receptor pathway	0	17	35	0	-1.21	0.188
Proteoglycan biosynthesis	0	17	36	0	-1.21	0.223
Triacylglyceride synthesis	0	17	37	0	-1.21	0.235
IL-6 signaling pathway	1	38	45	0.0263	-1.22	0.27
Osteoblast differentiation and related diseases	3	73	119	0.0411	-1.22	0.214
Regulation of actin cytoskeleton	5	106	160	0.0472	-1.25	0.215
Interleukin-11 signaling pathway	1	39	45	0.0256	-1.25	0.291
15q13.3 copy number variation syndrome	0	18	40	0	-1.25	0.237
Hematopoietic stem cell gene regulation by GABP alpha/beta complex	0	18	26	0	-1.25	0.13
Hypothesized pathways in pathogenesis of cardiovascular disease	0	18	27	0	-1.25	0.138
TP53 network	0	18	23	0	-1.25	0.116
Vitamin A and carotenoid metabolism	0	18	65	0	-1.25	0.181
Energy metabolism	1	40	49	0.025	-1.28	0.242
Angiotensin II receptor type 1 pathway	0	19	37	0	-1.28	0.172
mBDNF and proBDNF regulation of GABA neurotransmission	0	19	40	0	-1.28	0.211
STING pathway in Kawasaki-like disease and COVID-19	0	19	26	0	-1.28	0.089
Disruption of postsynaptic signaling by CNV	0	20	35	0	-1.32	0.124
Eicosanoid metabolism via cyclooxygenases (COX)	0	20	70	0	-1.32	0.147
Host-pathogen interaction of human coronaviruses - autophagy	0	20	23	0	-1.32	0.083
Regulation of apoptosis by parathyroid hormone-related protein	0	20	24	0	-1.32	0.116
Sphingolipid metabolism overview	0	20	55	0	-1.32	0.198
Cannabinoid receptor signaling	0	21	54	0	-1.35	0.177
Glycerolipids and glycerophospholipids	0	21	52	0	-1.35	0.18
Heart development	0	21	48	0	-1.35	0.172
Intracellular trafficking proteins involved in CMT neuropathy	0	21	28	0	-1.35	0.11
Mammary gland development pathway - Pregnancy and lactation (Stage 3 of 4)	0	21	42	0	-1.35	0.143
S1P receptor signal transduction	0	21	26	0	-1.35	0.082
Sphingolipid metabolism: integrated pathway	0	21	97	0	-1.35	0.193
Synaptic signaling pathways associated with autism spectrum disorder	1	43	55	0.0233	-1.37	0.209
IL-7 signaling pathway	0	22	26	0	-1.38	0.117
miRNA regulation of p53 pathway in prostate cancer	0	22	37	0	-1.38	0.098
FGFR3 signaling in chondrocyte proliferation and terminal differentiation	0	23	29	0	-1.41	0.1
Glycosylation and related congenital defects	0	23	73	0	-1.41	0.138
White fat cell differentiation	0	23	35	0	-1.41	0.104
Copper homeostasis	1	45	58	0.0222	-1.43	0.17
EPO receptor signaling	0	24	27	0	-1.44	0.096
Extracellular vesicle-mediated signaling in recipient cells	0	24	31	0	-1.44	0.103
Lipid metabolism pathway	0	24	43	0	-1.44	0.101
Zinc homeostasis	0	24	39	0	-1.44	0.085
Ectoderm differentiation	4	99	145	0.0404	-1.45	0.137
Neuroinflammation and glutamatergic signaling	4	99	178	0.0404	-1.45	0.134
Development of ureteric collection system	0	25	63	0	-1.47	0.149
Nanoparticle-mediated activation of receptor signaling	0	25	36	0	-1.47	0.084
Oxidation by cytochrome P450	0	25	75	0	-1.47	0.147
Regucalcin in proximal tubule epithelial kidney cells	0	25	68	0	-1.47	0.156
Resistin as a regulator of inflammation	0	26	34	0	-1.5	0.074
Sphingolipid pathway	0	26	63	0	-1.5	0.146
TLR4 signaling and tolerance	0	26	30	0	-1.5	0.075
Type I interferon induction and signaling during SARS-CoV-2 infection	0	26	45	0	-1.5	0.093
Hepatitis B infection	5	118	155	0.0424	-1.51	0.144
Corticotropin-releasing hormone signaling pathway	2	67	98	0.0299	-1.51	0.135
Leptin signaling pathway	2	67	77	0.0299	-1.51	0.123
Ras signaling	6	135	192	0.0444	-1.53	0.124
Type II interferon signaling (IFNG)	0	27	38	0	-1.53	0.086
IL-4 signaling pathway	1	49	55	0.0204	-1.54	0.111
PI3K-AKT-mTOR signaling pathway and therapeutic opportunities	0	28	33	0	-1.56	0.079
Type 2 papillary renal cell carcinoma	0	28	41	0	-1.56	0.08
Initiation of transcription and translation elongation at the HIV-1 LTR	0	29	35	0	-1.59	0.063
NO/cGMP/PKG mediated neuroprotection	0	29	65	0	-1.59	0.107
Tumor suppressor activity of SMARCB1	0	29	35	0	-1.59	0.069
Mitochondrial complex IV assembly	0	32	40	0	-1.67	0.069
Fragile X syndrome	3	94	133	0.0319	-1.72	0.083
Nonalcoholic fatty liver disease	5	131	170	0.0382	-1.77	0.079
Sterol regulatory element-binding proteins (SREBP) signaling	1	61	77	0.0164	-1.83	0.054
Ciliopathies	5	136	184	0.0368	-1.87	0.069
mRNA processing	4	119	130	0.0336	-1.87	0.066
Metapathway biotransformation Phase I and II	2	83	191	0.0241	-1.88	0.05
Thymic stromal lymphopoietin (TSLP) signaling pathway	0	41	49	0	-1.89	0.054
T-cell activation SARS-CoV-2	1	64	98	0.0156	-1.9	0.071
Exercise-induced circadian regulation	0	42	49	0	-1.91	0.042
Neurodegeneration with brain iron accumulation (NBIA) subtypes pathway	0	42	77	0	-1.91	0.039
Endoplasmic reticulum stress response in coronavirus infection	0	43	57	0	-1.94	0.035
Prolactin signaling pathway	1	67	79	0.0149	-1.97	0.037
Mitochondrial complex I assembly model OXPHOS system	0	51	61	0	-2.11	0.031
Ebola virus pathway in host	3	114	141	0.0263	-2.12	0.03
Cytosolic DNA-sensing pathway	0	52	77	0	-2.13	0.033
Novel intracellular components of RIG-I-like receptor (RLR) pathway	0	52	64	0	-2.13	0.025
Oxidative phosphorylation	0	59	68	0	-2.27	0.018
Alzheimer's disease	6	208	288	0.0288	-2.74	0.006
Alzheimer's disease and miRNA effects	6	209	358	0.0287	-2.76	0.009
Electron transport chain: OXPHOS system in mitochondria	0	95	119	0	-2.89	0.002
Acrylamide biotransformation and exposure biomarkers	0	0	10	NaN%	NaN	0
Amino acid conjugation of benzoic acid	0	0	15	NaN%	NaN	0
Amino acid conjugation	0	0	7	NaN%	NaN	0
Biochemical pathways: part I	0	0	471	NaN%	NaN	0
Blood clotting and drug effects	0	0	13	NaN%	NaN	0
Colchicine metabolic pathway	0	0	5	NaN%	NaN	0
Felbamate metabolism	0	0	12	NaN%	NaN	0
Glucose homeostasis	0	0	24	NaN%	NaN	0
Lidocaine metabolism	0	0	11	NaN%	NaN	0
Liver steatosis adverse outcome pathway	0	0	46	NaN%	NaN	0
Metabolism of dichloroethylene by CYP450	0	0	13	NaN%	NaN	0
Metabolism of tetrahydrocannabinol (THC)	0	0	11	NaN%	NaN	0
Metabolism overview	0	0	116	NaN%	NaN	0
Meta pathway lipodystrophy, dyslipidemia and hyperlipidemia	0	0	13	NaN%	NaN	0
Mitochondrial complex I inhibition leading to chemical-induced Fanconi syndrome	0	0	21	NaN%	NaN	0
Modified nucleosides derived from tRNA as urinary cancer markers	0	0	21	NaN%	NaN	0
Ophthalmate biosynthesis in hepatocytes	0	0	10	NaN%	NaN	0
Phosphatidylcholine catabolism	0	0	32	NaN%	NaN	0
Role of carnosine in muscle contraction	0	0	14	NaN%	NaN	0

## Sheet: THP1_RIVM3_adjPvalue020
Statistics results for Fri Dec 10 19:34:20 CET 2021
Dataset: J:\FHML_TGX\Danyel.Jennen\ProjectFolder\Projects\Filler-project\THP1_RIVM\pathvisio\noflags\THP1_RIVM_BioAlcamid_limma_OUTPUT_TABLE.pgex
Pathway directory: D:\wikipathways-20211110-gpml-Homo_sapiens
Gene database: D:\pathvisio-3.3.0\Hs_Derby_Ensembl_91.bridge
Criterion: [RIVM3_adj.P.Val] < 0.2
Calculation method: pathway-centric. Calculations are performed after mapping data to pathways.
Total data points (N): 8427
Data points meeting criterion (R): 749
Pathway	positive (r)	measured (n)	total	%	Z Score	p-value (permuted)
Retinoblastoma gene in cancer	39	81	98	0.4815	12.48	0
DNA replication	20	38	50	0.5263	9.5	0
G1 to S cell cycle control	22	59	68	0.3729	7.69	0
Cell cycle	27	107	124	0.2523	5.98	0
Vitamin B12 disorders	5	9	36	0.5556	4.92	0
DNA IR-damage and cellular response via ATR	18	72	90	0.25	4.82	0
Disorders of folate metabolism and transport	5	10	46	0.5	4.57	0
DNA mismatch repair	8	22	25	0.3636	4.53	0
DNA repair pathways, full network	22	108	125	0.2037	4.22	0
miR-517 relationship with ARCN1 and USP1	3	5	7	0.6	4.02	0.005
Nucleotide excision repair in xeroderma pigmentosum	13	57	62	0.2281	3.71	0
TYROBP causal network in microglia	12	51	61	0.2353	3.69	0
One-carbon metabolism	7	23	58	0.3043	3.64	0.002
Folate metabolism	10	41	142	0.2439	3.5	0
DNA damage response	13	61	78	0.2131	3.42	0
Gastric cancer network 1	7	25	30	0.28	3.36	0.004
p53 transcriptional gene network	12	57	78	0.2105	3.24	0
ATM signaling pathway	9	38	50	0.2368	3.21	0.004
Evolocumab mechanism to reduce LDL cholesterol	1	1	5	1	3.2	0.008
PCSK9-mediated LDL receptor degradation	1	1	3	1	3.2	0.004
Selenium micronutrient network	12	60	198	0.2	3.04	0.003
miRNA regulation of DNA damage response	13	68	106	0.1912	2.98	0.002
Nucleotide excision repair	9	41	44	0.2195	2.95	0.005
Pyrimidine metabolism	14	76	140	0.1842	2.93	0.003
Vitamin B12 metabolism	7	29	118	0.2414	2.89	0.004
Macrophage markers	3	8	10	0.375	2.84	0.019
Nucleotide metabolism	5	19	37	0.2632	2.67	0.013
Gastric cancer network 2	6	25	33	0.24	2.66	0.014
Regulation of sister chromatid separation at the metaphase-anaphase transition	4	14	16	0.2857	2.59	0.012
Nanomaterial-induced inflammasome activation	3	9	13	0.3333	2.58	0.011
Trans-sulfuration and one-carbon metabolism	6	26	66	0.2308	2.55	0.009
Hfe effect on hepcidin production	2	5	8	0.4	2.45	0.016
Base excision repair	6	27	32	0.2222	2.44	0.019
Glutathione metabolism	4	15	57	0.2667	2.42	0.014
Matrix metalloproteinases	5	21	31	0.2381	2.41	0.012
Male infertility	14	89	150	0.1573	2.28	0.024
Hypertrophy model	4	16	21	0.25	2.27	0.03
Fluoropyrimidine activity	6	29	58	0.2069	2.24	0.025
Pentose phosphate metabolism	2	6	21	0.3333	2.1	0.033
Serine metabolism	2	6	43	0.3333	2.1	0.03
Vitamin D receptor pathway	16	110	188	0.1455	2.1	0.032
Tryptophan metabolism	5	24	140	0.2083	2.06	0.036
Gastric acid production	1	2	22	0.5	2.04	0.042
Hypoxia-mediated EMT and stemness	1	2	6	0.5	2.04	0.037
Secretion of hydrochloric acid in parietal cells	1	2	15	0.5	2.04	0.036
Tyrosine metabolism	1	2	27	0.5	2.04	0.041
Ultraconserved region 339 modulation of tumor suppressor microRNAs in cancer	1	2	6	0.5	2.04	0.035
4-hydroxytamoxifen, Dexamethasone, and Retinoic Acids Regulation of p27 Expression	4	18	31	0.2222	1.99	0.036
Homologous recombination	3	12	14	0.25	1.96	0.043
ID signaling pathway	3	12	17	0.25	1.96	0.037
Metabolic pathway of LDL, HDL and TG, including diseases	3	12	34	0.25	1.96	0.044
Effect of progerin on genes involved in Hutchinson-Gilford progeria syndrome	5	25	30	0.2	1.96	0.05
NRF2 pathway	14	97	145	0.1443	1.93	0.059
Microglia pathogen phagocytosis pathway	6	33	44	0.1818	1.88	0.05
Oxidative stress response	5	26	35	0.1923	1.86	0.058
Activation of NLRP3 inflammasome by SARS-CoV-2	2	7	10	0.2857	1.83	0.061
Cerebral organic acidurias, including diseases	2	7	46	0.2857	1.83	0.037
COVID-19 adverse outcome pathway	2	7	24	0.2857	1.83	0.048
Farnesoid X receptor pathway	2	7	21	0.2857	1.83	0.035
Valproic acid pathway	2	7	36	0.2857	1.83	0.051
Globo sphingolipid metabolism	3	13	28	0.2308	1.8	0.057
NAD+ metabolism	3	13	34	0.2308	1.8	0.048
Pyrimidine metabolism and related diseases	3	13	97	0.2308	1.8	0.068
NAD metabolism in oncogene-induced senescence and mitochondrial dysfunction-associated senescence	4	20	46	0.2	1.75	0.059
Statin inhibition of cholesterol production	4	20	50	0.2	1.75	0.051
Biomarkers for pyrimidine metabolism disorders	3	14	88	0.2143	1.65	0.08
Riboflavin and CoQ disorders	3	14	59	0.2143	1.65	0.108
Pluripotent stem cell differentiation pathway	4	21	64	0.1905	1.64	0.102
BMP2-WNT4-FOXO1 pathway in primary endometrial stromal cell differentiation	2	8	16	0.25	1.6	0.08
Dual hijack model of Vif in HIV infection	2	8	10	0.25	1.6	0.076
Ethanol metabolism production of ROS by CYP2E1	2	8	28	0.25	1.6	0.078
Wnt signaling pathway and pluripotency	10	70	106	0.1429	1.59	0.109
Notch signaling	6	37	48	0.1622	1.57	0.078
Prostaglandin signaling	4	22	40	0.1818	1.53	0.074
Hepatitis C and hepatocellular carcinoma	7	46	63	0.1522	1.51	0.138
Fas ligand pathway and stress induction of heat shock proteins	6	38	48	0.1579	1.5	0.132
Direct reversal repair	1	3	4	0.3333	1.49	0.083
Vitamin B6-dependent and responsive disorders	1	3	29	0.3333	1.49	0.094
Cori cycle	2	9	53	0.2222	1.41	0.179
Familial hyperlipidemia type 2	2	9	36	0.2222	1.41	0.128
Familial hyperlipidemia type 3	2	9	24	0.2222	1.41	0.096
Familial hyperlipidemia type 5	2	9	28	0.2222	1.41	0.108
NAD metabolism, sirtuins and aging	2	9	16	0.2222	1.41	0.108
Physico-chemical features and toxicity-associated pathways	7	48	78	0.1458	1.39	0.182
Cohesin complex - Cornelia de Lange syndrome	5	32	37	0.1563	1.34	0.154
Wnt signaling in kidney disease	4	24	39	0.1667	1.34	0.15
Breast cancer pathway	14	113	167	0.1239	1.32	0.191
Eicosanoid synthesis	3	17	57	0.1765	1.27	0.198
Methionine de novo and salvage pathway	3	17	74	0.1765	1.27	0.189
Selective expression of chemokine receptors during T-cell polarization	3	17	30	0.1765	1.27	0.167
FBXL10 enhancement of MAP/ERK signaling in diffuse large B-cell lymphoma	5	33	36	0.1515	1.27	0.231
Antiviral and anti-inflammatory effects of Nrf2 on SARS-CoV-2 pathway	4	25	50	0.16	1.25	0.22
Common pathways underlying drug addiction	4	25	50	0.16	1.25	0.211
Familial hyperlipidemia type 1	2	10	35	0.2	1.24	0.262
Major receptors targeted by epinephrine and norepinephrine	2	10	34	0.2	1.24	0.252
Integrated cancer pathway	6	42	50	0.1429	1.23	0.253
Apoptosis-related network due to altered Notch3 in ovarian cancer	7	51	54	0.1373	1.22	0.206
Parkinson's disease pathway	5	34	84	0.1471	1.19	0.236
Phosphodiesterases in neuronal function	4	26	66	0.1538	1.17	0.24
Fatty acid biosynthesis	3	18	43	0.1667	1.16	0.26
Ectoderm differentiation	12	99	145	0.1212	1.14	0.277
Ketone bodies synthesis and degradation	1	4	13	0.25	1.13	0.104
Metabolism of alpha-linolenic acid	1	4	27	0.25	1.13	0.226
Robo4 and VEGF signaling pathways crosstalk	1	4	7	0.25	1.13	0.126
SCFA and skeletal muscle substrate metabolism	1	4	17	0.25	1.13	0.126
Sulindac metabolic pathway	1	4	11	0.25	1.13	0.119
Genotoxicity pathway	7	53	65	0.1321	1.11	0.265
Photodynamic therapy-induced NF-kB survival signaling	4	27	36	0.1481	1.08	0.315
Galanin receptor pathway	2	11	22	0.1818	1.08	0.188
Pathogenesis of SARS-CoV-2 mediated by nsp9-nsp10 complex	2	11	34	0.1818	1.08	0.32
NAD+ biosynthetic pathways	3	19	37	0.1579	1.06	0.324
B cell receptor signaling pathway	10	82	99	0.122	1.06	0.259
DNA IR-double strand breaks and cellular response via ATM	7	54	65	0.1296	1.06	0.313
GPCRs, other	6	45	114	0.1333	1.05	0.278
Adipogenesis	11	92	132	0.1196	1.04	0.286
Hair follicle development: organogenesis - part 2 of 3	3	20	36	0.15	0.96	0.372
Mammalian disorder of sexual development	2	12	29	0.1667	0.95	0.405
ncRNAs involved in STAT3 signaling in hepatocellular carcinoma	2	12	19	0.1667	0.95	0.331
Nuclear receptors meta-pathway	23	215	339	0.107	0.94	0.34
Microtubule cytoskeleton regulation	5	38	47	0.1316	0.93	0.308
Arachidonate epoxygenase / epoxide hydrolase	1	5	18	0.2	0.87	0.451
Caloric restriction and aging	1	5	13	0.2	0.87	0.246
Folate-alcohol and cancer pathway hypotheses	1	5	24	0.2	0.87	0.538
mir-124 predicted interactions with cell cycle and differentiation	1	5	8	0.2	0.87	0.208
Osteoblast signaling	1	5	18	0.2	0.87	0.471
Phase I biotransformations, non P450	1	5	13	0.2	0.87	0.252
PTF1A related regulatory pathway	1	5	12	0.2	0.87	0.211
Cannabinoid receptor signaling	3	21	54	0.1429	0.87	0.344
Ethanol effects on histone modifications	3	21	53	0.1429	0.87	0.374
Nuclear receptors in lipid metabolism and toxicity	3	21	48	0.1429	0.87	0.347
One-carbon metabolism and related pathways	5	39	94	0.1282	0.86	0.406
Familial hyperlipidemia type 4	2	13	36	0.1538	0.82	0.413
Interactions between LOXL4 and oxidative stress pathway	2	13	19	0.1538	0.82	0.559
Oxidative damage response	4	31	44	0.129	0.79	0.401
Small cell lung cancer	9	79	104	0.1139	0.79	0.445
Prostaglandin and leukotriene metabolism in senescence	3	22	57	0.1364	0.78	0.471
Primary focal segmental glomerulosclerosis (FSGS)	7	60	77	0.1167	0.76	0.45
Glioblastoma signaling pathways	8	70	88	0.1143	0.75	0.492
Ferroptosis	5	41	88	0.122	0.75	0.429
Kallmann syndrome	2	14	40	0.1429	0.71	0.474
MAP3K1 role in promoting and blocking gonadal determination	2	14	18	0.1429	0.71	0.605
SREBF and miR33 in cholesterol and lipid homeostasis	2	14	19	0.1429	0.71	0.593
Malignant pleural mesothelioma	31	310	468	0.1	0.7	0.489
Degradation pathway of sphingolipids, including diseases	1	6	41	0.1667	0.67	0.507
exRNA mechanism of action and biogenesis	1	6	8	0.1667	0.67	0.453
Lipid particles composition	1	6	21	0.1667	0.67	0.614
Steroid biosynthesis	1	6	25	0.1667	0.67	0.617
Apoptosis	8	72	88	0.1111	0.67	0.531
Burn wound healing	8	72	124	0.1111	0.67	0.523
Nucleotide-binding oligomerization domain (NOD) pathway	4	33	43	0.1212	0.65	0.53
Network map of SARS-CoV-2 signaling pathway	16	155	324	0.1032	0.63	0.535
Wnt signaling pathway	5	43	52	0.1163	0.63	0.55
Hippo-Merlin signaling dysregulation	9	83	121	0.1084	0.63	0.562
Myometrial relaxation and contraction pathways	11	104	161	0.1058	0.61	0.541
Pathways of nucleic acid metabolism and innate immune sensing	2	15	39	0.1333	0.61	0.55
Histone modifications	7	64	68	0.1094	0.58	0.556
Fatty acid beta-oxidation	3	25	71	0.12	0.55	0.611
Photodynamic therapy-induced unfolded protein response	3	25	28	0.12	0.55	0.575
Unfolded protein response	3	25	28	0.12	0.55	0.563
Regulation of actin cytoskeleton	11	106	160	0.1038	0.54	0.575
Overview of proinflammatory and profibrotic mediators	6	55	134	0.1091	0.53	0.603
Bile acids synthesis and enterohepatic circulation	1	7	18	0.1429	0.5	0.677
EV release from cardiac cells and their functional effects	1	7	17	0.1429	0.5	0.712
Genes targeted by miRNAs in adipocytes	1	7	19	0.1429	0.5	0.635
Serotonin transporter activity	1	7	15	0.1429	0.5	0.76
Sulfation biotransformation reaction	1	7	29	0.1429	0.5	0.598
Chromosomal and microsatellite instability in colorectal cancer	7	66	81	0.1061	0.49	0.651
Eicosanoid metabolism via lipooxygenases (LOX)	2	17	70	0.1176	0.42	0.7
Inflammatory response pathway	2	17	34	0.1176	0.42	0.661
Kynurenine pathway and links to cell senescence	2	17	56	0.1176	0.42	0.643
Nanomaterial induced apoptosis	2	17	31	0.1176	0.42	0.63
Purine metabolism and related disorders	2	17	139	0.1176	0.42	0.677
IL-18 signaling pathway	21	217	288	0.0968	0.41	0.688
miRNAs involved in DNA damage response	3	27	70	0.1111	0.41	0.689
Pancreatic adenocarcinoma pathway	8	79	97	0.1013	0.39	0.707
Acute viral myocarditis	7	69	110	0.1014	0.37	0.729
Acquired partial lipodystrophy / Barraquer-Simons syndrome	1	8	17	0.125	0.36	0.733
Dopamine metabolism	1	8	48	0.125	0.36	0.719
Ketogenesis and ketolysis	1	8	27	0.125	0.36	0.673
NAD biosynthesis II (from tryptophan)	1	8	34	0.125	0.36	0.767
Regulatory circuits of the STAT3 signaling pathway	6	59	79	0.1017	0.35	0.76
IL1 and megakaryocytes in obesity	2	18	26	0.1111	0.33	0.688
PPAR-alpha pathway	2	18	28	0.1111	0.33	0.687
Wnt/beta-catenin signaling pathway in leukemia	2	18	29	0.1111	0.33	0.679
Allograft Rejection	5	49	113	0.102	0.32	0.716
Overlap between signal transduction pathways contributing to LMNA laminopathies	5	49	73	0.102	0.32	0.752
Androgen receptor signaling pathway	8	82	90	0.0976	0.28	0.779
Apoptosis modulation and signaling	8	82	97	0.0976	0.28	0.768
MECP2 and associated Rett syndrome	5	50	114	0.1	0.28	0.764
Notch signaling pathway (Netpath)	5	50	62	0.1	0.28	0.78
Joubert syndrome	6	61	87	0.0984	0.26	0.799
1q21.1 copy number variation syndrome	2	19	58	0.1053	0.25	0.805
Progeria-associated lipodystrophy	2	19	36	0.1053	0.25	0.823
GDNF/RET signaling axis	1	9	24	0.1111	0.23	0.69
Heme biosynthesis	1	9	28	0.1111	0.23	0.772
Methionine metabolism leading to sulfur amino acids and related disorders	1	9	46	0.1111	0.23	0.786
MFAP5-mediated ovarian cancer cell motility and invasiveness	1	9	18	0.1111	0.23	0.799
Non-homologous end joining	1	9	11	0.1111	0.23	0.994
Nucleotide GPCRs	1	9	15	0.1111	0.23	0.911
TGF-beta signaling pathway	11	116	133	0.0948	0.23	0.828
Complement system in neuronal development and plasticity	7	73	137	0.0959	0.21	0.851
TNF-alpha signaling pathway	8	84	97	0.0952	0.21	0.847
DNA damage response (only ATM dependent)	9	95	118	0.0947	0.2	0.846
Host-pathogen interaction of human coronaviruses - apoptosis	2	20	34	0.1	0.17	0.907
Calcium regulation in cardiac cells	9	96	167	0.0938	0.17	0.871
Amyotrophic lateral sclerosis (ALS)	3	31	56	0.0968	0.15	0.904
Complement and coagulation cascades	3	31	63	0.0968	0.15	0.871
ATM signaling in development and disease	4	42	49	0.0952	0.15	0.893
lncRNA in canonical Wnt signaling and colorectal cancer	6	64	102	0.0938	0.14	0.896
Autosomal recessive osteopetrosis pathways	1	10	14	0.1	0.12	0.978
Blood clotting cascade	1	10	27	0.1	0.12	0.875
FGF23 signaling in hypophosphatemic rickets and related disorders	1	10	28	0.1	0.12	0.888
FOXP3 in COVID-19	1	10	19	0.1	0.12	0.859
Genes associated with the development of rheumatoid arthritis	1	10	22	0.1	0.12	0.827
lncRNA-mediated mechanisms of therapeutic resistance	1	10	14	0.1	0.12	0.978
Osteoclast signaling	1	10	21	0.1	0.12	0.813
SMC1/SMC3 role in DNA damage - Cornelia de Lange Syndrome	1	10	12	0.1	0.12	0.993
Trans-sulfuration pathway	1	10	25	0.1	0.12	0.838
Epithelial to mesenchymal transition in colorectal cancer	10	109	163	0.0917	0.11	0.913
Monoamine transport	2	21	47	0.0952	0.1	0.881
Vitamin D in inflammatory diseases	2	21	25	0.0952	0.1	0.871
Complement system	6	65	143	0.0923	0.1	0.918
Fibrin complement receptor 3 signaling pathway	3	32	47	0.0938	0.1	0.896
Glycogen synthesis and degradation	3	32	54	0.0938	0.1	0.909
Endometrial cancer	5	54	77	0.0926	0.1	0.938
Neural crest differentiation	5	54	102	0.0926	0.1	0.905
Interleukin-1 (IL-1) structural pathway	4	43	52	0.093	0.1	0.911
Orexin receptor pathway	9	99	225	0.0909	0.07	0.951
Ciliary landscape	17	189	215	0.0899	0.05	0.964
miRNA regulation of p53 pathway in prostate cancer	2	22	37	0.0909	0.03	0.983
Purinergic signaling	2	22	96	0.0909	0.03	0.977
Complement activation	1	11	24	0.0909	0.02	0.937
Fatty acid transporters	1	11	28	0.0909	0.02	0.96
Glycolysis in senescence	1	11	26	0.0909	0.02	0.946
Nitric oxide metabolism in cystic fibrosis	1	11	25	0.0909	0.02	0.946
OSX and miRNAs in tooth development	1	11	39	0.0909	0.02	0.998
Purine metabolism	1	11	94	0.0909	0.02	0.985
Arrhythmogenic right ventricular cardiomyopathy	4	45	81	0.0889	0	0.993
PPAR signaling pathway	4	45	76	0.0889	0	0.997
TGF-beta receptor signaling in skeletal dysplasias	4	45	60	0.0889	0	0.999
Metabolic reprogramming in colon cancer	3	34	80	0.0882	-0.01	0.978
Integrated breast cancer pathway	13	147	200	0.0884	-0.02	0.987
AMP-activated protein kinase (AMPK) signaling	5	57	78	0.0877	-0.03	0.98
Pathways affected in adenoid cystic carcinoma	5	57	72	0.0877	-0.03	0.981
Cardiac progenitor differentiation	2	23	56	0.087	-0.03	0.973
22q11.2 copy number variation syndrome	9	103	225	0.0874	-0.05	0.958
Canonical and non-canonical TGF-B signaling	1	12	18	0.0833	-0.07	0.946
Ganglio sphingolipid metabolism	1	12	56	0.0833	-0.07	0.957
Glycosaminoglycan degradation	1	12	45	0.0833	-0.07	0.941
Nanoparticle triggered regulated necrosis	1	12	26	0.0833	-0.07	0.888
RalA downstream regulated genes	1	12	13	0.0833	-0.07	0.994
Melanoma	5	58	78	0.0862	-0.07	0.945
Lipid metabolism pathway	2	24	43	0.0833	-0.1	0.911
ncRNAs involved in Wnt signaling in hepatocellular carcinoma	5	59	96	0.0847	-0.11	0.897
Proteasome degradation	5	59	67	0.0847	-0.11	0.924
Cholesterol metabolism with Bloch and Kandutsch-Russell pathways	3	36	97	0.0833	-0.12	0.897
Envelope proteins and their potential roles in EDMD physiopathology	3	36	47	0.0833	-0.12	0.876
Lung fibrosis	3	36	85	0.0833	-0.12	0.91
Mechanoregulation and pathology of YAP/TAZ via Hippo and non-Hippo mechanisms	3	36	47	0.0833	-0.12	0.895
Rett syndrome causing genes	3	36	60	0.0833	-0.12	0.918
Metapathway biotransformation Phase I and II	7	83	191	0.0843	-0.15	0.893
Cholesterol biosynthesis pathway	1	13	32	0.0769	-0.15	0.9
H19 action Rb-E2F1 signaling and CDK-Beta-catenin activity	1	13	17	0.0769	-0.15	0.912
Osteopontin signaling	1	13	14	0.0769	-0.15	0.981
Regulation of Wnt / B-catenin signaling by small molecule compounds	1	13	33	0.0769	-0.15	0.911
Interactions of natural killer cells in pancreatic cancer	2	25	43	0.08	-0.16	0.856
Oxidation by cytochrome P450	2	25	75	0.08	-0.16	0.874
Phosphoinositides metabolism	3	37	89	0.0811	-0.17	0.86
Oncostatin M signaling pathway	5	61	66	0.082	-0.19	0.853
Embryonic stem cell pluripotency pathways	6	73	123	0.0822	-0.2	0.852
Interactions between immune cells and microRNAs in tumor microenvironment	2	26	52	0.0769	-0.21	0.786
Prion disease pathway	2	26	36	0.0769	-0.21	0.912
Type I interferon induction and signaling during SARS-CoV-2 infection	2	26	45	0.0769	-0.21	0.813
Vitamin D-sensitive calcium signaling in depression	2	26	55	0.0769	-0.21	0.821
Cysteine and methionine catabolism	1	14	74	0.0714	-0.23	0.792
Extracellular vesicles in the crosstalk of cardiac cells	1	14	30	0.0714	-0.23	0.823
FOXA2 pathway	1	14	23	0.0714	-0.23	0.743
Metabolism of spingolipids in ER and Golgi apparatus	1	14	72	0.0714	-0.23	0.815
MFAP5 effect on permeability and motility of endothelial cells via cytoskeleton rearrangement	1	14	20	0.0714	-0.23	0.808
Mitochondrial long chain fatty acid beta-oxidation	1	14	24	0.0714	-0.23	0.735
PKC-gamma calcium signaling pathway in ataxia	1	14	29	0.0714	-0.23	0.774
TGF-beta signaling in thyroid cells for epithelial-mesenchymal transition	1	14	20	0.0714	-0.23	0.796
Integrin-mediated cell adhesion	7	86	102	0.0814	-0.25	0.803
Sudden infant death syndrome (SIDS) susceptibility pathways	8	98	182	0.0816	-0.25	0.805
Peptide GPCRs	2	27	79	0.0741	-0.27	0.778
Serotonin receptor 4/6/7 and NR3C signaling	1	15	22	0.0667	-0.3	0.704
Transcriptional activation by NRF2 in response to phytochemicals	1	15	20	0.0667	-0.3	0.757
Transcription factor regulation in adipogenesis	1	15	24	0.0667	-0.3	0.682
Kit receptor signaling pathway	4	52	60	0.0769	-0.3	0.776
Genes related to primary cilium development (based on CRISPR)	7	88	104	0.0795	-0.31	0.748
Aripiprazole metabolic pathway	0	1	7	0	-0.31	0.933
Caffeine and theobromine metabolism	0	1	18	0	-0.31	0.785
Catalytic cycle of mammalian flavin-containing monooxygenases (FMOs)	0	1	14	0	-0.31	0.933
COVID-19, thrombosis and anticoagulation	0	1	27	0	-0.31	0.678
Diclofenac metabolic pathway	0	1	12	0	-0.31	0.972
Downregulation of ACE2 expression by SARS-CoV infection and SARS-CoV spike protein	0	1	8	0	-0.31	0.954
FABP4 in ovarian cancer	0	1	3	0	-0.31	0.485
Hormonal control of pubertal growth spurt	0	1	8	0	-0.31	0.955
Hypothetical craniofacial development pathway	0	1	11	0	-0.31	0.984
Influenza A virus infection	0	1	16	0	-0.31	0.864
Model for regulation of MSMP expression in cancer cells and its proangiogenic role in ovarian tumors	0	1	6	0	-0.31	0.871
Nicotine metabolism in liver cells	0	1	18	0	-0.31	0.81
Soluble ACE2-mediated cell entry of SARS-CoV-2	0	1	7	0	-0.31	0.93
Type 2 papillary renal cell carcinoma	2	28	41	0.0714	-0.33	0.792
Spinal cord injury	6	77	127	0.0779	-0.34	0.755
Glucocorticoid receptor pathway	4	53	73	0.0755	-0.34	0.758
Translation inhibitors in chronically activated PDGFRA cells	3	41	49	0.0732	-0.35	0.744
Apoptosis modulation by HSP70	1	16	22	0.0625	-0.37	0.658
Cancer immunotherapy by PD-1 blockade	1	16	35	0.0625	-0.37	0.701
Serotonin receptor 2 and ELK-SRF/GATA4 signaling	1	16	24	0.0625	-0.37	0.645
Chemokine signaling pathway	10	126	172	0.0794	-0.38	0.717
Pathogenic Escherichia coli infection	3	42	79	0.0714	-0.4	0.722
TGF-beta receptor signaling	3	42	56	0.0714	-0.4	0.677
G13 signaling pathway	2	30	39	0.0667	-0.43	0.708
Hedgehog signaling pathway	2	30	44	0.0667	-0.43	0.67
p38 MAPK signaling pathway	2	30	36	0.0667	-0.43	0.675
Senescence and autophagy in cancer	7	92	112	0.0761	-0.43	0.65
Focal adhesion	12	152	201	0.0789	-0.43	0.656
Angiogenesis	1	17	25	0.0588	-0.44	0.608
Congenital generalized lipodystrophy (CGL)	1	17	31	0.0588	-0.44	0.625
Pregnane X receptor pathway	1	17	35	0.0588	-0.44	0.645
Endoplasmic reticulum stress response in coronavirus infection	3	43	57	0.0698	-0.44	0.644
Amino acid metabolism pathway excerpt: histidine catabolism extension	0	2	23	0	-0.44	0.637
Biosynthesis and regeneration of tetrahydrobiopterin and catabolism of phenylalanine	0	2	38	0	-0.44	0.661
Butyrate-induced histone acetylation	0	2	11	0	-0.44	0.922
Heroin metabolism	0	2	8	0	-0.44	0.824
HIPK2 in kidney fibrosis	0	2	8	0	-0.44	0.839
Mevalonate arm of cholesterol biosynthesis pathway with inhibitors	0	2	64	0	-0.44	0.65
Neurotransmitter disorders	0	2	27	0	-0.44	0.599
Nicotine effect on chromaffin cells	0	2	10	0	-0.44	0.908
Polyol pathway	0	2	17	0	-0.44	0.753
Tamoxifen metabolism	0	2	37	0	-0.44	0.66
G protein signaling pathways	5	68	97	0.0735	-0.45	0.671
Host-pathogen interaction of human coronaviruses - interferon induction	2	31	47	0.0645	-0.48	0.654
Photodynamic therapy-induced HIF-1 survival signaling	2	31	38	0.0645	-0.48	0.652
15q13.3 copy number variation syndrome	1	18	40	0.0556	-0.5	0.64
Hematopoietic stem cell gene regulation by GABP alpha/beta complex	1	18	26	0.0556	-0.5	0.615
Imatinib and chronic myeloid leukemia	1	18	25	0.0556	-0.5	0.608
TP53 network	1	18	23	0.0556	-0.5	0.641
Urea cycle and associated pathways	1	18	81	0.0556	-0.5	0.658
Urea cycle and metabolism of amino groups	1	18	71	0.0556	-0.5	0.645
Influence of laminopathies on Wnt signaling	2	32	45	0.0625	-0.53	0.654
Pre-implantation embryo	2	32	60	0.0625	-0.53	0.592
Arylamine metabolism	0	3	13	0	-0.54	0.8
Conversion of angiotensinogen to angiotensin II	0	3	9	0	-0.54	0.723
eIF5A regulation in response to inhibition of the nuclear export system	0	3	6	0	-0.54	0.415
Ethylmalonic encephalopathy	0	3	20	0	-0.54	0.658
Fatty acid omega-oxidation	0	3	20	0	-0.54	0.665
GABA metabolism (aka GHB)	0	3	42	0	-0.54	0.63
Glycine metabolism	0	3	19	0	-0.54	0.653
MED and pseudoachondroplasia genes	0	3	7	0	-0.54	0.582
MicroRNA network associated with chronic lymphocytic leukemia	0	3	10	0	-0.54	0.809
Oxytocin signaling	0	3	10	0	-0.54	0.79
SARS-CoV-2 altering angiogenesis via NRP1	0	3	11	0	-0.54	0.811
SARS-CoV-2 and angiotensin-converting enzyme 2 receptor: molecular mechanisms	0	3	14	0	-0.54	0.752
Somitogenesis in the context of spondylocostal dysostosis	0	3	10	0	-0.54	0.783
Thyroxine (thyroid hormone) production	0	3	12	0	-0.54	0.8
Vitamins A and D - action mechanisms	0	3	14	0	-0.54	0.783
Synaptic vesicle pathway	2	33	59	0.0606	-0.57	0.58
Mesodermal commitment pathway	7	97	154	0.0722	-0.58	0.565
Thermogenesis	6	85	140	0.0706	-0.6	0.576
Hair follicle development: cytodifferentiation - part 3 of 3	3	47	93	0.0638	-0.61	0.547
Eicosanoid metabolism via cyclooxygenases (COX)	1	20	70	0.05	-0.61	0.547
MTHFR deficiency	1	20	60	0.05	-0.61	0.544
Nanoparticle triggered autophagic cell death	1	20	30	0.05	-0.61	0.51
Physiological and pathological hypertrophy of the heart	1	20	27	0.05	-0.61	0.552
Osteoblast differentiation and related diseases	5	73	119	0.0685	-0.61	0.535
CCL18 signaling pathway	2	34	177	0.0588	-0.62	0.539
Aflatoxin B1 metabolism	0	4	16	0	-0.62	0.693
Benzene metabolism	0	4	17	0	-0.62	0.696
Control of immune tolerance by vasoactive intestinal peptide	0	4	16	0	-0.62	0.684
Eicosanoid metabolism via cytochrome P450 monooxygenases (CYP) pathway	0	4	23	0	-0.62	0.618
Glial cell differentiation	0	4	9	0	-0.62	0.554
let-7 inhibition of ES cell reprogramming	0	4	17	0	-0.62	0.686
Linoleic acid metabolism affected by coronavirus infection	0	4	28	0	-0.62	0.55
miR-222 in exercise-induced cardiac growth	0	4	5	0	-0.62	0.207
Peroxiredoxin 2 induced ovarian failure	0	4	13	0	-0.62	0.721
Peroxisomal beta-oxidation of tetracosanoyl-CoA	0	4	17	0	-0.62	0.68
Serotonin receptor 2 and STAT3 signaling	0	4	6	0	-0.62	0.274
Tgif disruption of Shh signaling	0	4	10	0	-0.62	0.626
Ciliopathies	10	136	184	0.0735	-0.63	0.547
Sterol regulatory element-binding proteins (SREBP) signaling	4	61	77	0.0656	-0.64	0.505
IL-1 signaling pathway	3	48	57	0.0625	-0.64	0.523
Thyroid hormones production and peripheral downstream signaling effects	5	74	134	0.0676	-0.65	0.531
IL-5 signaling pathway	2	35	41	0.0571	-0.66	0.546
Nephrotic syndrome	2	35	49	0.0571	-0.66	0.559
Glycerolipids and glycerophospholipids	1	21	52	0.0476	-0.67	0.529
Heart development	1	21	48	0.0476	-0.67	0.513
Intracellular trafficking proteins involved in CMT neuropathy	1	21	28	0.0476	-0.67	0.554
T cell receptor and co-stimulatory signaling	1	21	45	0.0476	-0.67	0.524
Endoderm differentiation	7	100	147	0.07	-0.67	0.526
Non-small cell lung cancer	4	62	88	0.0645	-0.68	0.53
Interferon type I signaling pathways	3	49	57	0.0612	-0.68	0.505
7q11.23 copy number variation syndrome	6	88	149	0.0682	-0.69	0.491
Benzo(a)pyrene metabolism	0	5	17	0	-0.7	0.579
Cell-type dependent selectivity of CCK2R signaling	0	5	26	0	-0.7	0.581
Cholesterol biosynthesis with skeletal dysplasias	0	5	23	0	-0.7	0.605
Codeine and morphine metabolism	0	5	25	0	-0.7	0.571
Effects of nitric oxide	0	5	16	0	-0.7	0.583
Fluoroacetic acid toxicity	0	5	16	0	-0.7	0.611
Gamma-glutamyl cycle for the biosynthesis and degradation of glutathione, including diseases	0	5	24	0	-0.7	0.606
HIF1A and PPARG regulation of glycolysis	0	5	19	0	-0.7	0.632
Irinotecan pathway	0	5	18	0	-0.7	0.626
Kinin-Kallikrein pathway	0	5	10	0	-0.7	0.433
Lamin A-processing pathway	0	5	8	0	-0.7	0.335
Methylation pathways	0	5	15	0	-0.7	0.598
Somatic sex determination	0	5	15	0	-0.7	0.584
Somatroph axis (GH) and its relationship to dietary restriction and aging	0	5	12	0	-0.7	0.508
TCA cycle nutrient use and invasiveness of ovarian cancer	0	5	11	0	-0.7	0.451
Bladder cancer	2	36	47	0.0556	-0.7	0.502
Netrin-UNC5B signaling pathway	2	36	53	0.0556	-0.7	0.509
Ebstein-Barr virus LMP1 signaling	1	22	25	0.0455	-0.72	0.56
SARS-CoV-2 innate immunity evasion and cell-specific immune response	3	50	92	0.06	-0.72	0.44
Cytoplasmic ribosomal proteins	5	77	89	0.0649	-0.74	0.467
Mitochondrial complex I assembly model OXPHOS system	3	51	61	0.0588	-0.76	0.48
Acetylcholine synthesis	0	6	18	0	-0.77	0.525
Alternative pathway of fetal androgen synthesis	0	6	48	0	-0.77	0.47
Biogenic amine synthesis	0	6	33	0	-0.77	0.432
Biomarkers for urea cycle disorders	0	6	51	0	-0.77	0.472
Estrogen metabolism	0	6	45	0	-0.77	0.446
FTO obesity variant mechanism	0	6	11	0	-0.77	0.349
Gene regulatory network modelling somitogenesis	0	6	13	0	-0.77	0.4
Glucuronidation	0	6	41	0	-0.77	0.451
Insulin signaling in adipocytes (diabetic condition)	0	6	12	0	-0.77	0.361
Insulin signaling in adipocytes (normal condition)	0	6	15	0	-0.77	0.488
Krebs cycle disorders	0	6	34	0	-0.77	0.417
Metastatic brain tumor	0	6	28	0	-0.77	0.52
MicroRNA for targeting cancer growth and vascularization in glioblastoma	0	6	10	0	-0.77	0.302
miRNA biogenesis	0	6	7	0	-0.77	0.236
Mitochondrial fatty acid synthesis pathway	0	6	21	0	-0.77	0.594
Molybdenum cofactor (Moco) biosynthesis	0	6	21	0	-0.77	0.597
Pilocytic astrocytoma	0	6	14	0	-0.77	0.443
SARS-CoV-2 and COVID-19 pathway	0	6	70	0	-0.77	0.426
7-oxo-C and 7-beta-HC pathways	1	23	60	0.0435	-0.77	0.465
FGFR3 signaling in chondrocyte proliferation and terminal differentiation	1	23	29	0.0435	-0.77	0.491
Genes controlling nephrogenesis	1	23	45	0.0435	-0.77	0.442
NRF2-ARE regulation	1	23	24	0.0435	-0.77	0.57
Nuclear receptors	1	23	44	0.0435	-0.77	0.416
Relationship between inflammation, COX-2 and EGFR	1	23	29	0.0435	-0.77	0.484
Head and neck squamous cell carcinoma	4	65	81	0.0615	-0.78	0.483
IL-6 signaling pathway	2	38	45	0.0526	-0.79	0.409
VEGFA-VEGFR2 signaling pathway	28	362	436	0.0773	-0.79	0.424
Cytosolic DNA-sensing pathway	3	52	77	0.0577	-0.79	0.431
EPO receptor signaling	1	24	27	0.0417	-0.81	0.519
Extracellular vesicle-mediated signaling in recipient cells	1	24	31	0.0417	-0.81	0.462
Zinc homeostasis	1	24	39	0.0417	-0.81	0.369
ACE inhibitor pathway	0	7	29	0	-0.83	0.46
ATR signaling	0	7	10	0	-0.83	0.267
Cellular proteostasis	0	7	15	0	-0.83	0.368
DDX1 as a regulatory component of the Drosha microprocessor	0	7	8	0	-0.83	0.232
Drug induction of bile acid pathway	0	7	45	0	-0.83	0.374
EDA signaling in hair follicle development	0	7	15	0	-0.83	0.373
Liver X receptor pathway	0	7	12	0	-0.83	0.282
NIPBL role in DNA damage - Cornelia de Lange syndrome	0	7	9	0	-0.83	0.228
Type III interferon signaling	0	7	11	0	-0.83	0.272
Vitamin D metabolism	0	7	22	0	-0.83	0.513
TNF-related weak inducer of apoptosis (TWEAK) signaling pathway	2	39	45	0.0513	-0.83	0.375
16p11.2 proximal deletion syndrome	4	67	152	0.0597	-0.84	0.395
Development of ureteric collection system	1	25	63	0.04	-0.86	0.388
Regucalcin in proximal tubule epithelial kidney cells	1	25	68	0.04	-0.86	0.402
Sphingolipid metabolism in senescence	1	25	49	0.04	-0.86	0.394
Wnt signaling	5	81	121	0.0617	-0.86	0.382
Hippo signaling regulation pathways	4	68	104	0.0588	-0.87	0.395
15q11.2 copy number variation syndrome	0	8	13	0	-0.88	0.163
Alanine and aspartate metabolism	0	8	66	0	-0.88	0.377
Altered glycosylation of MUC1 in tumor microenvironment	0	8	10	0	-0.88	0.154
Bone morphogenic protein (BMP) signaling and regulation	0	8	13	0	-0.88	0.2
Canonical NF-kB pathway	0	8	9	0	-0.88	0.172
GPCRs, class C metabotropic glutamate, pheromone	0	8	15	0	-0.88	0.261
Hijack of ubiquitination by SARS-CoV-2	0	8	12	0	-0.88	0.165
IL-10 anti-inflammatory signaling pathway	0	8	19	0	-0.88	0.394
Inclusion body myositis	0	8	27	0	-0.88	0.48
Interleukin-1 induced activation of NF-kB	0	8	13	0	-0.88	0.183
LDLRAD4 and what we know about it	0	8	12	0	-0.88	0.185
Leptin and adiponectin	0	8	14	0	-0.88	0.223
Mitochondrial complex II assembly	0	8	10	0	-0.88	0.136
SARS-CoV-2 B.1.1.7 variant antagonises innate immune activation	0	8	15	0	-0.88	0.237
Serotonin and anxiety-related events	0	8	16	0	-0.88	0.303
Supression of HMGB1 mediated inflammation by THBD	0	8	10	0	-0.88	0.164
Thiamine metabolic pathways	0	8	34	0	-0.88	0.421
Transcription factors regulate miRNAs related to cardiac hypertrophy	0	8	16	0	-0.88	0.307
Autophagy	1	26	33	0.0385	-0.9	0.433
Melatonin metabolism and effects	1	26	64	0.0385	-0.9	0.372
Brain-derived neurotrophic factor (BDNF) signaling pathway	7	110	150	0.0636	-0.94	0.377
Aerobic glycolysis	0	9	35	0	-0.94	0.362
ApoE and miR-146 in inflammation and atherosclerosis	0	9	13	0	-0.94	0.155
Biotin metabolism, including IEMs	0	9	38	0	-0.94	0.382
Cancer immunotherapy by CTLA4 blockade	0	9	21	0	-0.94	0.392
Classical pathway of steroidogenesis with glucocorticoid and mineralocorticoid metabolism	0	9	73	0	-0.94	0.35
Cytokines and inflammatory response	0	9	32	0	-0.94	0.413
Mammary gland development pathway - Embryonic development (Stage 1 of 4)	0	9	21	0	-0.94	0.411
Mammary gland development pathway - Involution (Stage 4 of 4)	0	9	13	0	-0.94	0.143
Nicotine effect on dopaminergic neurons	0	9	31	0	-0.94	0.436
Nod-like receptor (NLR) signaling pathway	0	9	11	0	-0.94	0.152
NOTCH1 regulation of endothelial cell calcification	0	9	18	0	-0.94	0.299
Omega-9 fatty acid synthesis	0	9	44	0	-0.94	0.341
Circadian rhythm genes	9	136	209	0.0662	-0.94	0.37
Endochondral ossification with skeletal dysplasias	2	42	69	0.0476	-0.94	0.349
Endochondral ossification	2	42	69	0.0476	-0.94	0.349
BDNF-TrkB signaling	1	27	38	0.037	-0.95	0.36
Familial partial lipodystrophy (FPLD)	1	27	44	0.037	-0.95	0.338
Glycerophospholipid biosynthetic pathway	1	27	107	0.037	-0.95	0.331
Signal transduction through IL1R	1	27	34	0.037	-0.95	0.386
Type II interferon signaling (IFNG)	1	27	38	0.037	-0.95	0.357
RAC1/PAK1/p38/MMP2 pathway	3	57	74	0.0526	-0.96	0.359
Thyroid stimulating hormone (TSH) signaling pathway	3	57	67	0.0526	-0.96	0.339
IL-3 signaling pathway	2	43	50	0.0465	-0.98	0.327
Cells and molecules involved in local acute inflammatory response	0	10	19	0	-0.99	0.245
ERK pathway in Huntington's disease	0	10	17	0	-0.99	0.209
Estrogen receptor pathway	0	10	16	0	-0.99	0.178
GPR40 pathway	0	10	20	0	-0.99	0.285
Hedgehog signaling pathway Netpath	0	10	17	0	-0.99	0.209
Iron metabolism in placenta	0	10	15	0	-0.99	0.168
Mammary gland development pathway - Puberty (Stage 2 of 4)	0	10	15	0	-0.99	0.154
SRF and miRs in smooth muscle differentiation and proliferation	0	10	18	0	-0.99	0.212
TCA cycle in senescence	0	10	30	0	-0.99	0.371
Oxysterols derived from cholesterol	1	28	112	0.0357	-0.99	0.326
Neuroinflammation and glutamatergic signaling	6	99	178	0.0606	-0.99	0.305
Alpha 6 beta 4 signaling pathway	1	29	34	0.0345	-1.03	0.381
Factors and pathways affecting insulin-like growth factor (IGF1)-Akt signaling	1	29	43	0.0345	-1.03	0.294
Initiation of transcription and translation elongation at the HIV-1 LTR	1	29	35	0.0345	-1.03	0.384
MAPK cascade	1	29	37	0.0345	-1.03	0.367
Aspirin and miRNAs	0	11	24	0	-1.04	0.294
Development of pulmonary dendritic cells and macrophage subsets	0	11	14	0	-1.04	0.134
Dopaminergic neurogenesis	0	11	32	0	-1.04	0.348
GPCRs, class B secretin-like	0	11	24	0	-1.04	0.281
Leptin-insulin signaling overlap	0	11	20	0	-1.04	0.233
miR-509-3p alteration of YAP1/ECM axis	0	11	19	0	-1.04	0.201
Transcriptional cascade regulating adipogenesis	0	11	14	0	-1.04	0.146
T-cell antigen receptor (TCR) pathway during Staphylococcus aureus infection	2	45	70	0.0444	-1.05	0.317
MAPK signaling pathway	12	180	258	0.0667	-1.06	0.292
Hepatocyte growth factor receptor signaling	1	30	35	0.0333	-1.07	0.343
Neovascularisation processes	1	30	42	0.0333	-1.07	0.285
Prostaglandin synthesis and regulation	1	30	61	0.0333	-1.07	0.279
Airway smooth muscle cell contraction	0	12	25	0	-1.08	0.287
BMP signaling in eyelid development	0	12	23	0	-1.08	0.225
Deregulation of Rab and Rab effector genes in bladder cancer	0	12	17	0	-1.08	0.164
Development and heterogeneity of the ILC family	0	12	33	0	-1.08	0.284
Differentiation of white and brown adipocyte	0	12	26	0	-1.08	0.28
Kennedy pathway from sphingolipids	0	12	35	0	-1.08	0.339
MAPK and NFkB signaling pathways inhibited by Yersinia YopJ	0	12	13	0	-1.08	0.134
Mevalonate arm of cholesterol biosynthesis pathway	0	12	55	0	-1.08	0.235
Omega-3 / omega-6 fatty acid synthesis	0	12	53	0	-1.08	0.263
Serotonin and anxiety	0	12	22	0	-1.08	0.228
Small ligand GPCRs	0	12	25	0	-1.08	0.277
ErbB signaling pathway	4	75	101	0.0533	-1.09	0.276
Glycolysis and gluconeogenesis	1	31	69	0.0323	-1.11	0.27
Neural crest cell migration in cancer	1	31	43	0.0323	-1.11	0.293
Amplification and expansion of oncogenic pathways as metastatic traits	0	13	18	0	-1.13	0.139
Cell differentiation - index	0	13	61	0	-1.13	0.251
GABA receptor signaling	0	13	57	0	-1.13	0.224
Mitochondrial gene expression	0	13	23	0	-1.13	0.171
MYD88 distinct input-output pathway	0	13	20	0	-1.13	0.142
Neuroinflammation	0	13	31	0	-1.13	0.273
TCA cycle and deficiency of pyruvate dehydrogenase complex (PDHc)	0	13	37	0	-1.13	0.311
Hepatitis B infection	7	118	155	0.0593	-1.14	0.242
MAPK pathway in congenital thyroid cancer	0	14	19	0	-1.17	0.155
Mitochondrial complex III assembly	0	14	19	0	-1.17	0.14
nsp1 from SARS-CoV-2 inhibits translation initiation in the host cell	0	14	21	0	-1.17	0.143
Host-pathogen interaction of human coronaviruses - MAPK signaling	1	33	43	0.0303	-1.18	0.254
miRNAs involvement in the immune response in sepsis	1	33	69	0.0303	-1.18	0.222
IL-4 signaling pathway	2	49	55	0.0408	-1.19	0.223
IL-9 signaling pathway	0	15	18	0	-1.21	0.155
Monoamine GPCRs	0	15	43	0	-1.21	0.252
Overview of nanoparticle effects	0	15	42	0	-1.21	0.259
PI3K/AKT/mTOR - VitD3 signaling	0	15	34	0	-1.21	0.246
Type II diabetes mellitus	0	15	28	0	-1.21	0.165
Cell differentiation - expanded index	0	16	69	0	-1.25	0.215
Interactome of polycomb repressive complex 2 (PRC2)	0	16	17	0	-1.25	0.119
miRNA targets in ECM and membrane receptors	0	16	46	0	-1.25	0.234
Ovarian infertility	0	16	33	0	-1.25	0.19
Overview of interferons-mediated signaling pathway	0	16	38	0	-1.25	0.233
SARS coronavirus and innate immunity	0	16	33	0	-1.25	0.199
Clear cell renal cell carcinoma pathways	3	67	92	0.0448	-1.27	0.223
Corticotropin-releasing hormone signaling pathway	3	67	98	0.0448	-1.27	0.194
Constitutive androstane receptor pathway	0	17	34	0	-1.29	0.176
Oligodendrocyte specification and differentiation, leading to myelin components for CNS	0	17	46	0	-1.29	0.214
Proteoglycan biosynthesis	0	17	36	0	-1.29	0.179
TCA cycle (aka Krebs or citric acid cycle)	0	17	49	0	-1.29	0.215
Transcription co-factors SKI and SKIL protein partners	0	17	19	0	-1.29	0.113
Triacylglyceride synthesis	0	17	37	0	-1.29	0.191
Proximal tubule transport	1	36	86	0.0278	-1.29	0.181
GPCRs, class A rhodopsin-like	5	98	272	0.051	-1.32	0.192
Hypothesized pathways in pathogenesis of cardiovascular disease	0	18	27	0	-1.33	0.1
Inhibition of exosome biogenesis and secretion by Manumycin A in CRPC cells	0	18	19	0	-1.33	0.109
Vitamin A and carotenoid metabolism	0	18	65	0	-1.33	0.189
Prader-Willi and Angelman syndrome	1	38	90	0.0263	-1.36	0.175
EGFR tyrosine kinase inhibitor resistance	3	70	92	0.0429	-1.36	0.185
Angiotensin II receptor type 1 pathway	0	19	37	0	-1.36	0.14
mBDNF and proBDNF regulation of GABA neurotransmission	0	19	40	0	-1.36	0.167
RAS and bradykinin pathways in COVID-19	0	19	51	0	-1.36	0.176
STING pathway in Kawasaki-like disease and COVID-19	0	19	26	0	-1.36	0.102
T-cell receptor (TCR) signaling pathway	3	71	93	0.0423	-1.39	0.181
Interleukin-11 signaling pathway	1	39	45	0.0256	-1.39	0.166
Disruption of postsynaptic signaling by CNV	0	20	35	0	-1.4	0.105
Estrogen signaling pathway	0	20	26	0	-1.4	0.09
Host-pathogen interaction of human coronaviruses - autophagy	0	20	23	0	-1.4	0.102
Regulation of apoptosis by parathyroid hormone-related protein	0	20	24	0	-1.4	0.096
Sphingolipid metabolism overview	0	20	55	0	-1.4	0.162
Striated muscle contraction pathway	0	20	39	0	-1.4	0.118
Non-genomic actions of 1,25 dihydroxyvitamin D3	2	56	97	0.0357	-1.4	0.145
MicroRNAs in cardiomyocyte hypertrophy	3	72	109	0.0417	-1.41	0.154
EGF/EGFR signaling pathway	8	144	163	0.0556	-1.42	0.14
Energy metabolism	1	40	49	0.025	-1.42	0.16
Hippo-Yap signaling pathway	0	21	24	0	-1.43	0.096
Mammary gland development pathway - Pregnancy and lactation (Stage 3 of 4)	0	21	42	0	-1.43	0.139
S1P receptor signal transduction	0	21	26	0	-1.43	0.086
Sphingolipid metabolism: integrated pathway	0	21	97	0	-1.43	0.153
Nonalcoholic fatty liver disease	7	131	170	0.0534	-1.44	0.139
Thymic stromal lymphopoietin (TSLP) signaling pathway	1	41	49	0.0244	-1.45	0.161
Cell migration and invasion through p75NTR	0	22	31	0	-1.47	0.084
IL-7 signaling pathway	0	22	26	0	-1.47	0.091
Photodynamic therapy-induced NFE2L2 (NRF2) survival signaling	0	22	24	0	-1.47	0.1
Aryl hydrocarbon receptor Netpath	1	42	57	0.0238	-1.49	0.164
3q29 copy number variation syndrome	2	59	115	0.0339	-1.49	0.131
Canonical and non-canonical Notch signaling	0	23	31	0	-1.5	0.079
Endothelin pathways	0	23	48	0	-1.5	0.125
Follicle stimulating hormone (FSH) signaling pathway	0	23	28	0	-1.5	0.088
Glycosylation and related congenital defects	0	23	73	0	-1.5	0.122
Immune response to tuberculosis	0	23	24	0	-1.5	0.097
Intraflagellar transport proteins binding to dynein	0	23	28	0	-1.5	0.111
White fat cell differentiation	0	23	35	0	-1.5	0.083
Synaptic signaling pathways associated with autism spectrum disorder	1	43	55	0.0233	-1.52	0.14
Parkin-ubiquitin proteasomal system pathway	2	60	75	0.0333	-1.52	0.113
Toll-like receptor signaling pathway	3	76	117	0.0395	-1.52	0.113
Ras signaling	7	135	192	0.0519	-1.52	0.146
16p11.2 distal deletion syndrome	0	24	46	0	-1.53	0.091
IL-17 signaling pathway	0	24	33	0	-1.53	0.059
Mitochondrial immune response to SARS-CoV-2	0	24	62	0	-1.53	0.141
Type I collagen synthesis in the context of osteogenesis imperfecta	0	24	36	0	-1.53	0.068
PI3K-Akt signaling pathway	13	219	359	0.0594	-1.56	0.113
Nanoparticle-mediated activation of receptor signaling	0	25	36	0	-1.56	0.074
Cardiac hypertrophic response	1	45	61	0.0222	-1.58	0.119
CAMKK2 pathway	0	26	143	0	-1.59	0.123
Resistin as a regulator of inflammation	0	26	34	0	-1.59	0.082
Sphingolipid pathway	0	26	63	0	-1.59	0.11
TLR4 signaling and tolerance	0	26	30	0	-1.59	0.067
RANKL/RANK signaling pathway	1	46	58	0.0217	-1.6	0.115
Kisspeptin/kisspeptin receptor system in the ovary	0	27	49	0	-1.63	0.068
Translation factors	1	47	51	0.0213	-1.63	0.087
PI3K-AKT-mTOR signaling pathway and therapeutic opportunities	0	28	33	0	-1.66	0.058
Renin-angiotensin-aldosterone system (RAAS)	0	28	57	0	-1.66	0.092
Toll-like receptor signaling related to MyD88	0	28	32	0	-1.66	0.064
Gastrin signaling pathway	4	97	115	0.0412	-1.66	0.087
Neural crest cell migration during development	0	29	40	0	-1.68	0.056
NO/cGMP/PKG mediated neuroprotection	0	29	65	0	-1.68	0.088
Splicing factor NOVA regulated synaptic proteins	0	29	44	0	-1.68	0.062
Tumor suppressor activity of SMARCB1	0	29	35	0	-1.68	0.055
Aryl hydrocarbon receptor pathway	0	30	49	0	-1.71	0.049
Overview of leukocyte-intrinsic Hippo pathway functions	0	31	37	0	-1.74	0.055
Modulators of TCR signaling and T cell activation	1	51	66	0.0196	-1.74	0.071
Mitochondrial complex IV assembly	0	32	40	0	-1.77	0.05
Novel intracellular components of RIG-I-like receptor (RLR) pathway	1	52	64	0.0192	-1.77	0.062
Amino acid metabolism	2	70	205	0.0286	-1.78	0.063
PDGF pathway	0	34	53	0	-1.82	0.055
Alzheimer's disease	11	208	288	0.0529	-1.85	0.075
Eukaryotic transcription initiation	0	35	42	0	-1.85	0.048
Target of rapamycin (TOR) signaling	0	35	40	0	-1.85	0.049
Alzheimer's disease and miRNA effects	11	209	358	0.0526	-1.86	0.068
Focal adhesion: PI3K-Akt-mTOR-signaling pathway	11	209	305	0.0526	-1.86	0.055
IL-2 signaling pathway	0	37	43	0	-1.9	0.051
Oxidative phosphorylation	1	59	68	0.0169	-1.95	0.045
AGE/RAGE pathway	1	61	67	0.0164	-2	0.032
Regulation of toll-like receptor signaling pathway	4	113	153	0.0354	-2.01	0.044
Exercise-induced circadian regulation	0	42	49	0	-2.03	0.035
Neurodegeneration with brain iron accumulation (NBIA) subtypes pathway	0	42	77	0	-2.03	0.026
Ebola virus pathway in host	4	114	141	0.0351	-2.03	0.048
T-cell activation SARS-CoV-2	1	64	98	0.0156	-2.07	0.038
Copper homeostasis	0	45	58	0	-2.1	0.038
Insulin signaling	5	134	162	0.0373	-2.11	0.031
mRNA processing	4	119	130	0.0336	-2.13	0.028
Leptin signaling pathway	1	67	77	0.0149	-2.14	0.03
Fragile X syndrome	2	94	133	0.0213	-2.32	0.016
Prolactin signaling pathway	0	67	79	0	-2.57	0.012
Angiopoietin-like protein 8 regulatory pathway	2	110	157	0.0182	-2.62	0.006
Electron transport chain: OXPHOS system in mitochondria	1	95	119	0.0105	-2.7	0.004
Acrylamide biotransformation and exposure biomarkers	0	0	10	NaN%	NaN	0
Amino acid conjugation of benzoic acid	0	0	15	NaN%	NaN	0
Amino acid conjugation	0	0	7	NaN%	NaN	0
Biochemical pathways: part I	0	0	471	NaN%	NaN	0
Blood clotting and drug effects	0	0	13	NaN%	NaN	0
Colchicine metabolic pathway	0	0	5	NaN%	NaN	0
Felbamate metabolism	0	0	12	NaN%	NaN	0
Glucose homeostasis	0	0	24	NaN%	NaN	0
Lidocaine metabolism	0	0	11	NaN%	NaN	0
Liver steatosis adverse outcome pathway	0	0	46	NaN%	NaN	0
Metabolism of dichloroethylene by CYP450	0	0	13	NaN%	NaN	0
Metabolism of tetrahydrocannabinol (THC)	0	0	11	NaN%	NaN	0
Metabolism overview	0	0	116	NaN%	NaN	0
Meta pathway lipodystrophy, dyslipidemia and hyperlipidemia	0	0	13	NaN%	NaN	0
Mitochondrial complex I inhibition leading to chemical-induced Fanconi syndrome	0	0	21	NaN%	NaN	0
Modified nucleosides derived from tRNA as urinary cancer markers	0	0	21	NaN%	NaN	0
Ophthalmate biosynthesis in hepatocytes	0	0	10	NaN%	NaN	0
Phosphatidylcholine catabolism	0	0	32	NaN%	NaN	0
Role of carnosine in muscle contraction	0	0	14	NaN%	NaN	0

## Sheet: THP1_Perfectha_FL_adjPvalue005
Statistics results for Fri Dec 10 21:41:32 CET 2021
Dataset: J:\FHML_TGX\Danyel.Jennen\ProjectFolder\Projects\Filler-project\THP1_Perfectha\pathvisio\noflags\THP1_Perfectha_limma_OUTPUT_TABLE.pgex
Pathway directory: D:\wikipathways-20211110-gpml-Homo_sapiens
Gene database: D:\pathvisio-3.3.0\Hs_Derby_Ensembl_91.bridge
Criterion: [FL_adj.P.Val] < 0.05
Calculation method: pathway-centric. Calculations are performed after mapping data to pathways.
Total data points (N): 8363
Data points meeting criterion (R): 520
Pathway	positive (r)	measured (n)	total	%	Z Score	p-value (permuted)
DNA replication	15	37	50	0.4054	8.66	0
Retinoblastoma gene in cancer	23	79	98	0.2911	8.47	0
G1 to S cell cycle control	18	58	68	0.3103	7.85	0
Hepatitis C and hepatocellular carcinoma	11	45	63	0.2444	5.08	0
Cell cycle	19	105	124	0.181	5.07	0
Pentose phosphate metabolism	3	5	21	0.6	4.98	0
Oxidative stress response	7	25	35	0.28	4.52	0
Ferroptosis	9	40	88	0.225	4.27	0.001
Nuclear receptors meta-pathway	27	204	339	0.1324	4.2	0
DNA mismatch repair	6	22	25	0.2727	4.09	0.002
Photodynamic therapy-induced NFE2L2 (NRF2) survival signaling	6	22	24	0.2727	4.09	0.001
NRF2 pathway	15	92	145	0.163	4.03	0
Antiviral and anti-inflammatory effects of Nrf2 on SARS-CoV-2 pathway	6	23	50	0.2609	3.95	0.003
ATM signaling pathway	8	37	50	0.2162	3.89	0
Ultraconserved region 339 modulation of tumor suppressor microRNAs in cancer	1	1	6	1	3.88	0.001
DNA IR-damage and cellular response via ATR	12	69	90	0.1739	3.86	0.001
miRNAs involved in DNA damage response	6	25	70	0.24	3.69	0.003
Sulindac metabolic pathway	2	4	11	0.5	3.63	0.006
Transcriptional activation by NRF2 in response to phytochemicals	4	14	20	0.2857	3.47	0.005
Lamin A-processing pathway	2	5	8	0.4	3.13	0.01
Integrated cancer pathway	7	39	50	0.1795	3.04	0.008
miRNA regulation of DNA damage response	10	66	106	0.1515	3.02	0.008
DNA repair pathways, full network	14	106	125	0.1321	3	0.003
Effect of progerin on genes involved in Hutchinson-Gilford progeria syndrome	5	24	30	0.2083	2.97	0.01
Gastric cancer network 2	5	24	33	0.2083	2.97	0.008
Zinc homeostasis	5	24	39	0.2083	2.97	0.009
Alternative pathway of fetal androgen synthesis	2	6	48	0.3333	2.75	0.011
ID signaling pathway	3	12	17	0.25	2.7	0.014
Fluoropyrimidine activity	5	27	58	0.1852	2.65	0.009
Biosynthesis and regeneration of tetrahydrobiopterin and catabolism of phenylalanine	1	2	38	0.5	2.56	0.017
Heroin metabolism	1	2	8	0.5	2.56	0.018
Hypoxia-mediated EMT and stemness	1	2	6	0.5	2.56	0.019
Tyrosine metabolism	1	2	27	0.5	2.56	0.015
Hair follicle development: cytodifferentiation - part 3 of 3	7	46	93	0.1522	2.53	0.016
Biomarkers for pyrimidine metabolism disorders	3	13	88	0.2308	2.52	0.012
Nucleotide excision repair in xeroderma pigmentosum	8	56	62	0.1429	2.51	0.019
COVID-19 adverse outcome pathway	2	7	24	0.2857	2.45	0.026
Pluripotent stem cell differentiation pathway	4	21	64	0.1905	2.44	0.02
Glucocorticoid receptor pathway	7	49	73	0.1429	2.35	0.018
NRF2-ARE regulation	4	22	24	0.1818	2.33	0.031
Glutathione metabolism	3	15	57	0.2	2.21	0.024
IL-10 anti-inflammatory signaling pathway	2	8	19	0.25	2.2	0.028
Pyrimidine metabolism	9	74	140	0.1216	2.13	0.038
Gastric cancer network 1	4	24	30	0.1667	2.12	0.03
p53 transcriptional gene network	7	53	78	0.1321	2.11	0.037
Spinal cord injury	9	75	127	0.12	2.08	0.039
Overview of nanoparticle effects	3	16	42	0.1875	2.08	0.036
Nucleotide GPCRs	2	9	15	0.2222	1.99	0.043
Copper homeostasis	6	45	58	0.1333	1.98	0.032
Adipogenesis	10	91	132	0.1099	1.9	0.051
Senescence and autophagy in cancer	10	91	112	0.1099	1.9	0.055
Cells and molecules involved in local acute inflammatory response	2	10	19	0.2	1.81	0.056
FOXP3 in COVID-19	2	10	19	0.2	1.81	0.061
Iron metabolism in placenta	2	10	15	0.2	1.81	0.076
DNA damage response	7	59	78	0.1186	1.8	0.053
Oxysterols derived from cholesterol	4	28	112	0.1429	1.77	0.091
Integrated breast cancer pathway	14	145	200	0.0966	1.73	0.082
Aryl hydrocarbon receptor pathway	4	29	49	0.1379	1.69	0.063
IL-18 signaling pathway	19	212	288	0.0896	1.68	0.082
Nucleotide excision repair	5	40	44	0.125	1.65	0.062
Malignant pleural mesothelioma	26	308	468	0.0844	1.65	0.081
ncRNAs involved in STAT3 signaling in hepatocellular carcinoma	2	11	19	0.1818	1.64	0.082
Hair follicle development: organogenesis - part 2 of 3	3	20	36	0.15	1.63	0.077
TYROBP causal network in microglia	6	52	61	0.1154	1.59	0.076
Benzene metabolism	1	4	17	0.25	1.56	0.068
SCFA and skeletal muscle substrate metabolism	1	4	17	0.25	1.56	0.099
Cohesin complex - Cornelia de Lange syndrome	4	31	37	0.129	1.54	0.085
Purinergic signaling	3	21	96	0.1429	1.53	0.125
Homologous recombination	2	12	14	0.1667	1.5	0.077
Pyrimidine metabolism and related diseases	2	12	97	0.1667	1.5	0.127
Regulation of Wnt / B-catenin signaling by small molecule compounds	2	12	33	0.1667	1.5	0.067
Influence of laminopathies on Wnt signaling	4	32	45	0.125	1.47	0.091
Endochondral ossification with skeletal dysplasias	5	43	69	0.1163	1.47	0.146
Endochondral ossification	5	43	69	0.1163	1.47	0.146
Cell migration and invasion through p75NTR	3	22	31	0.1364	1.44	0.073
FBXL10 enhancement of MAP/ERK signaling in diffuse large B-cell lymphoma	4	33	36	0.1212	1.41	0.085
Microglia pathogen phagocytosis pathway	4	33	44	0.1212	1.41	0.07
BMP signaling in eyelid development	2	13	23	0.1538	1.37	0.107
MYD88 distinct input-output pathway	2	13	20	0.1538	1.37	0.097
One-carbon metabolism	3	23	58	0.1304	1.36	0.174
Wnt signaling pathway and pluripotency	7	69	106	0.1014	1.36	0.145
ncRNAs involved in Wnt signaling in hepatocellular carcinoma	6	57	96	0.1053	1.35	0.143
Nephrotic syndrome	4	34	49	0.1176	1.34	0.124
Glioblastoma signaling pathways	7	70	88	0.1	1.32	0.174
Lung fibrosis	4	35	85	0.1143	1.28	0.172
Caloric restriction and aging	1	5	13	0.2	1.28	0.075
Farnesoid X receptor pathway	1	5	21	0.2	1.28	0.117
Fluoroacetic acid toxicity	1	5	16	0.2	1.28	0.097
Gamma-glutamyl cycle for the biosynthesis and degradation of glutathione, including diseases	1	5	24	0.2	1.28	0.126
Hfe effect on hepcidin production	1	5	8	0.2	1.28	0.12
Irinotecan pathway	1	5	18	0.2	1.28	0.105
Methylation pathways	1	5	15	0.2	1.28	0.087
miR-517 relationship with ARCN1 and USP1	1	5	7	0.2	1.28	0.137
Serine metabolism	1	5	43	0.2	1.28	0.131
Steroid biosynthesis	1	5	25	0.2	1.28	0.123
Regulatory circuits of the STAT3 signaling pathway	6	59	79	0.1017	1.26	0.206
Physico-chemical features and toxicity-associated pathways	5	47	78	0.1064	1.26	0.207
Breast cancer pathway	10	110	167	0.0909	1.26	0.265
Vitamin D receptor pathway	10	110	188	0.0909	1.26	0.226
Cancer immunotherapy by PD-1 blockade	2	14	35	0.1429	1.25	0.097
Cysteine and methionine catabolism	2	14	74	0.1429	1.25	0.226
Regulation of sister chromatid separation at the metaphase-anaphase transition	2	14	16	0.1429	1.25	0.105
Burn wound healing	7	72	124	0.0972	1.24	0.242
CCL18 signaling pathway	4	36	177	0.1111	1.22	0.22
Overlap between signal transduction pathways contributing to LMNA laminopathies	5	48	73	0.1042	1.21	0.238
Interactions between LOXL4 and oxidative stress pathway	2	15	19	0.1333	1.14	0.118
Metabolism of spingolipids in ER and Golgi apparatus	2	15	72	0.1333	1.14	0.262
MFAP5 effect on permeability and motility of endothelial cells via cytoskeleton rearrangement	2	15	20	0.1333	1.14	0.106
Base excision repair	3	26	32	0.1154	1.13	0.177
Prader-Willi and Angelman syndrome	4	38	90	0.1053	1.1	0.259
Regulation of actin cytoskeleton	9	103	160	0.0874	1.07	0.268
Apoptosis-related network due to altered Notch3 in ovarian cancer	5	51	54	0.098	1.06	0.339
Estrogen metabolism	1	6	45	0.1667	1.06	0.396
Glucuronidation	1	6	41	0.1667	1.06	0.342
HIF1A and PPARG regulation of glycolysis	1	6	19	0.1667	1.06	0.098
Phase I biotransformations, non P450	1	6	13	0.1667	1.06	0.137
CAMKK2 pathway	3	27	143	0.1111	1.05	0.261
Vitamin D-sensitive calcium signaling in depression	3	27	55	0.1111	1.05	0.331
IL-9 signaling pathway	2	16	18	0.125	1.04	0.136
Pathways of nucleic acid metabolism and innate immune sensing	2	16	39	0.125	1.04	0.337
PPAR-alpha pathway	2	16	28	0.125	1.04	0.166
DNA IR-double strand breaks and cellular response via ATM	5	52	65	0.0962	1.02	0.305
TGF-beta receptor signaling	4	40	56	0.1	0.99	0.342
4-hydroxytamoxifen, Dexamethasone, and Retinoic Acids Regulation of p27 Expression	2	17	31	0.1176	0.95	0.412
Methionine de novo and salvage pathway	2	17	74	0.1176	0.95	0.297
Neural crest differentiation	5	54	102	0.0926	0.93	0.342
Network map of SARS-CoV-2 signaling pathway	12	150	324	0.08	0.91	0.362
PPAR signaling pathway	4	42	76	0.0952	0.89	0.334
Dopamine metabolism	1	7	48	0.1429	0.88	0.392
Interleukin-1 induced activation of NF-kB	1	7	13	0.1429	0.88	0.204
LDLRAD4 and what we know about it	1	7	12	0.1429	0.88	0.21
Type III interferon signaling	1	7	11	0.1429	0.88	0.214
Vitamin D metabolism	1	7	22	0.1429	0.88	0.296
Nuclear receptors in lipid metabolism and toxicity	2	18	48	0.1111	0.86	0.415
Urea cycle and metabolism of amino groups	2	18	71	0.1111	0.86	0.336
Wnt/beta-catenin signaling pathway in leukemia	2	18	29	0.1111	0.86	0.508
ATM signaling in development and disease	4	43	49	0.093	0.84	0.425
TGF-beta receptor signaling in skeletal dysplasias	4	43	60	0.093	0.84	0.384
Mesodermal commitment pathway	8	97	154	0.0825	0.83	0.41
Thyroid stimulating hormone (TSH) signaling pathway	5	57	67	0.0877	0.8	0.376
NAD metabolism in oncogene-induced senescence and mitochondrial dysfunction-associated senescence	2	19	46	0.1053	0.78	0.399
Nucleotide metabolism	2	19	37	0.1053	0.78	0.528
Acquired partial lipodystrophy / Barraquer-Simons syndrome	1	8	17	0.125	0.74	0.382
Classical pathway of steroidogenesis with glucocorticoid and mineralocorticoid metabolism	1	8	73	0.125	0.74	0.465
Ethanol metabolism production of ROS by CYP2E1	1	8	28	0.125	0.74	0.602
Leptin and adiponectin	1	8	14	0.125	0.74	0.319
Mammary gland development pathway - Involution (Stage 4 of 4)	1	8	13	0.125	0.74	0.323
MFAP5-mediated ovarian cancer cell motility and invasiveness	1	8	18	0.125	0.74	0.439
Sulfation biotransformation reaction	1	8	29	0.125	0.74	0.606
Transcription factors regulate miRNAs related to cardiac hypertrophy	1	8	16	0.125	0.74	0.375
Primary focal segmental glomerulosclerosis (FSGS)	5	59	77	0.0847	0.72	0.522
Male infertility	7	87	150	0.0805	0.71	0.5
1q21.1 copy number variation syndrome	2	20	58	0.1	0.7	0.408
7-oxo-C and 7-beta-HC pathways	2	20	60	0.1	0.7	0.469
Nanoparticle triggered autophagic cell death	2	20	30	0.1	0.7	0.631
Progeria-associated lipodystrophy	2	20	36	0.1	0.7	0.58
Parkin-ubiquitin proteasomal system pathway	5	60	75	0.0833	0.68	0.582
RANKL/RANK signaling pathway	4	47	58	0.0851	0.65	0.504
Toll-like receptor signaling pathway	6	75	117	0.08	0.64	0.567
Metabolic reprogramming in colon cancer	3	34	80	0.0882	0.63	0.542
Ebstein-Barr virus LMP1 signaling	2	21	25	0.0952	0.63	0.664
Blood clotting cascade	1	9	27	0.1111	0.61	0.66
Estrogen receptor pathway	1	9	16	0.1111	0.61	0.784
NOTCH1 regulation of endothelial cell calcification	1	9	18	0.1111	0.61	0.778
Pathogenesis of SARS-CoV-2 mediated by nsp9-nsp10 complex	1	9	34	0.1111	0.61	0.626
Thiamine metabolic pathways	1	9	34	0.1111	0.61	0.61
Selenium micronutrient network	5	62	198	0.0806	0.6	0.589
Circadian rhythm genes	10	135	209	0.0741	0.58	0.535
Histone modifications	5	63	68	0.0794	0.57	0.624
lncRNA in canonical Wnt signaling and colorectal cancer	5	63	102	0.0794	0.57	0.554
Allograft Rejection	4	49	113	0.0816	0.57	0.589
MECP2 and associated Rett syndrome	4	49	114	0.0816	0.57	0.597
Endothelin pathways	2	22	48	0.0909	0.56	0.501
Matrix metalloproteinases	2	22	31	0.0909	0.56	0.649
Prostaglandin signaling	2	22	40	0.0909	0.56	0.578
Wnt signaling in kidney disease	2	22	39	0.0909	0.56	0.579
Pancreatic adenocarcinoma pathway	6	78	97	0.0769	0.54	0.567
Autosomal recessive osteopetrosis pathways	1	10	14	0.1	0.5	0.943
Cori cycle	1	10	53	0.1	0.5	0.578
Disorders of folate metabolism and transport	1	10	46	0.1	0.5	0.584
Glycolysis in senescence	1	10	26	0.1	0.5	0.688
Mammalian disorder of sexual development	1	10	29	0.1	0.5	0.661
NAD metabolism, sirtuins and aging	1	10	16	0.1	0.5	0.935
SMC1/SMC3 role in DNA damage - Cornelia de Lange Syndrome	1	10	12	0.1	0.5	0.908
Glycosylation and related congenital defects	2	23	73	0.087	0.49	0.63
IL-7 signaling pathway	2	23	26	0.087	0.49	0.714
Oxidation by cytochrome P450	2	23	75	0.087	0.49	0.67
Cholesterol metabolism with Bloch and Kandutsch-Russell pathways	3	37	97	0.0811	0.48	0.662
Fas ligand pathway and stress induction of heat shock proteins	3	37	48	0.0811	0.48	0.622
SARS-CoV-2 innate immunity evasion and cell-specific immune response	4	52	92	0.0769	0.44	0.658
Regulation of toll-like receptor signaling pathway	8	111	153	0.0721	0.43	0.65
Nuclear receptors	2	24	44	0.0833	0.43	0.619
IL-2 signaling pathway	3	38	43	0.0789	0.43	0.637
IL-6 signaling pathway	3	38	45	0.0789	0.43	0.658
Complement activation	1	11	24	0.0909	0.39	0.771
Deregulation of Rab and Rab effector genes in bladder cancer	1	11	17	0.0909	0.39	0.949
Fatty acid transporters	1	11	28	0.0909	0.39	0.683
Genes associated with the development of rheumatoid arthritis	1	11	22	0.0909	0.39	0.815
Nitric oxide metabolism in cystic fibrosis	1	11	25	0.0909	0.39	0.75
One-carbon metabolism and related pathways	3	39	94	0.0769	0.38	0.736
Orexin receptor pathway	7	98	225	0.0714	0.38	0.726
Fatty acid beta-oxidation	2	25	71	0.08	0.37	0.722
Phosphodiesterases in neuronal function	2	25	66	0.08	0.37	0.729
Trans-sulfuration and one-carbon metabolism	2	25	66	0.08	0.37	0.739
Type I interferon induction and signaling during SARS-CoV-2 infection	2	25	45	0.08	0.37	0.726
Apoptosis	5	69	88	0.0725	0.36	0.713
Embryonic stem cell pluripotency pathways	5	69	123	0.0725	0.36	0.735
Overview of proinflammatory and profibrotic mediators	4	55	134	0.0727	0.33	0.772
Ciliary landscape	13	192	215	0.0677	0.32	0.757
Nanoparticle-mediated activation of receptor signaling	2	26	36	0.0769	0.31	0.648
Photodynamic therapy-induced NF-kB survival signaling	2	26	36	0.0769	0.31	0.651
Prion disease pathway	2	26	36	0.0769	0.31	0.674
Resistin as a regulator of inflammation	2	26	34	0.0769	0.31	0.649
Airway smooth muscle cell contraction	1	12	25	0.0833	0.3	0.777
Canonical and non-canonical TGF-B signaling	1	12	18	0.0833	0.3	0.975
FOXA2 pathway	1	12	23	0.0833	0.3	0.866
Globo sphingolipid metabolism	1	12	28	0.0833	0.3	0.716
Glycosaminoglycan degradation	1	12	45	0.0833	0.3	0.794
H19 action Rb-E2F1 signaling and CDK-Beta-catenin activity	1	12	17	0.0833	0.3	0.984
Metabolic pathway of LDL, HDL and TG, including diseases	1	12	34	0.0833	0.3	0.672
Nanoparticle triggered regulated necrosis	1	12	26	0.0833	0.3	0.751
PKC-gamma calcium signaling pathway in ataxia	1	12	29	0.0833	0.3	0.674
Melanoma	4	56	78	0.0714	0.29	0.774
22q11.2 copy number variation syndrome	7	102	225	0.0686	0.27	0.791
7q11.23 copy number variation syndrome	6	87	149	0.069	0.26	0.748
Interactions between immune cells and microRNAs in tumor microenvironment	2	27	52	0.0741	0.26	0.882
Neural crest cell migration during development	2	27	40	0.0741	0.26	0.767
AMP-activated protein kinase (AMPK) signaling	4	57	78	0.0702	0.25	0.797
Non-genomic actions of 1,25 dihydroxyvitamin D3	4	57	97	0.0702	0.25	0.795
Aryl hydrocarbon receptor Netpath	3	42	57	0.0714	0.25	0.873
Folate metabolism	3	42	142	0.0714	0.25	0.804
Amplification and expansion of oncogenic pathways as metastatic traits	1	13	18	0.0769	0.22	0.988
MAPK pathway in congenital thyroid cancer	1	13	19	0.0769	0.22	0.969
Mitochondrial long chain fatty acid beta-oxidation	1	13	24	0.0769	0.22	0.876
Monoamine GPCRs	1	13	43	0.0769	0.22	0.841
NAD+ metabolism	1	13	34	0.0769	0.22	0.701
Neuroinflammation	1	13	31	0.0769	0.22	0.702
Pathogenic Escherichia coli infection	3	43	79	0.0698	0.21	0.825
Familial partial lipodystrophy (FPLD)	2	28	44	0.0714	0.2	0.862
Tumor suppressor activity of SMARCB1	2	28	35	0.0714	0.2	0.749
Arrhythmogenic right ventricular cardiomyopathy	3	44	81	0.0682	0.17	0.859
MAPK cascade	2	29	37	0.069	0.15	0.785
p38 MAPK signaling pathway	2	29	36	0.069	0.15	0.769
Oncostatin M signaling pathway	4	60	66	0.0667	0.14	0.856
Kallmann syndrome	1	14	40	0.0714	0.14	0.839
Brain-derived neurotrophic factor (BDNF) signaling pathway	7	107	150	0.0654	0.14	0.912
Complement and coagulation cascades	2	30	63	0.0667	0.1	0.897
Host-pathogen interaction of human coronaviruses - interferon induction	2	30	47	0.0667	0.1	0.957
Neural crest cell migration in cancer	2	30	43	0.0667	0.1	0.942
Vitamin B12 metabolism	2	30	118	0.0667	0.1	0.93
Small cell lung cancer	5	77	104	0.0649	0.1	0.9
AGE/RAGE pathway	4	62	67	0.0645	0.08	0.899
miRNA targets in ECM and membrane receptors	1	15	46	0.0667	0.07	0.97
Mitochondrial complex III assembly	1	15	19	0.0667	0.07	0.999
nsp1 from SARS-CoV-2 inhibits translation initiation in the host cell	1	15	21	0.0667	0.07	0.991
SARS coronavirus and innate immunity	1	15	33	0.0667	0.07	0.841
SREBF and miR33 in cholesterol and lipid homeostasis	1	15	19	0.0667	0.07	0.999
TGF-beta signaling in thyroid cells for epithelial-mesenchymal transition	1	15	20	0.0667	0.07	0.995
Wnt signaling	5	78	121	0.0641	0.07	0.956
Fibrin complement receptor 3 signaling pathway	2	31	47	0.0645	0.05	0.99
16p11.2 proximal deletion syndrome	4	63	152	0.0635	0.04	0.968
3q29 copy number variation syndrome	4	63	115	0.0635	0.04	0.975
Chromosomal and microsatellite instability in colorectal cancer	4	63	81	0.0635	0.04	0.978
MAPK signaling pathway	11	175	258	0.0629	0.04	0.976
TNF-alpha signaling pathway	5	80	97	0.0625	0.01	0.98
IL-1 signaling pathway	3	48	57	0.0625	0.01	0.979
miRNAs involvement in the immune response in sepsis	2	32	69	0.0625	0.01	0.973
Parkinson's disease pathway	2	32	84	0.0625	0.01	0.996
Hypertrophy model	1	16	21	0.0625	0.01	0.998
Inflammatory response pathway	1	16	34	0.0625	0.01	0.941
Interactome of polycomb repressive complex 2 (PRC2)	1	16	17	0.0625	0.01	0.999
Nanomaterial induced apoptosis	1	16	31	0.0625	0.01	0.95
Overview of interferons-mediated signaling pathway	1	16	38	0.0625	0.01	0.963
Serotonin receptor 2 and ELK-SRF/GATA4 signaling	1	16	24	0.0625	0.01	0.985
Head and neck squamous cell carcinoma	4	65	81	0.0615	-0.02	0.988
Angiogenesis	1	17	25	0.0588	-0.06	0.979
Eicosanoid metabolism via cyclooxygenases (COX)	1	17	70	0.0588	-0.06	0.929
Eicosanoid metabolism via lipooxygenases (LOX)	1	17	70	0.0588	-0.06	0.917
IL1 and megakaryocytes in obesity	1	17	26	0.0588	-0.06	0.956
Oligodendrocyte specification and differentiation, leading to myelin components for CNS	1	17	46	0.0588	-0.06	0.977
Novel intracellular components of RIG-I-like receptor (RLR) pathway	3	50	64	0.06	-0.06	0.929
Fatty acid biosynthesis	1	18	43	0.0556	-0.12	0.901
IL-5 signaling pathway	2	35	41	0.0571	-0.12	0.872
Netrin-UNC5B signaling pathway	2	35	53	0.0571	-0.12	0.947
PDGF pathway	2	35	53	0.0571	-0.12	0.957
Genotoxicity pathway	3	52	65	0.0577	-0.13	0.834
Kit receptor signaling pathway	3	52	60	0.0577	-0.13	0.914
Focal adhesion	9	152	201	0.0592	-0.15	0.87
Bladder cancer	2	36	47	0.0556	-0.16	0.948
Notch signaling	2	36	48	0.0556	-0.16	0.94
Congenital generalized lipodystrophy (CGL)	1	19	31	0.0526	-0.17	0.766
Statin inhibition of cholesterol production	1	19	50	0.0526	-0.17	0.946
STING pathway in Kawasaki-like disease and COVID-19	1	19	26	0.0526	-0.17	0.861
Osteoblast differentiation and related diseases	4	70	119	0.0571	-0.18	0.875
Endometrial cancer	3	54	77	0.0556	-0.2	0.864
EGFR tyrosine kinase inhibitor resistance	4	71	92	0.0563	-0.2	0.85
Envelope proteins and their potential roles in EDMD physiopathology	2	37	47	0.0541	-0.21	0.906
Estrogen signaling pathway	1	20	26	0.05	-0.23	0.811
Intracellular trafficking proteins involved in CMT neuropathy	1	20	28	0.05	-0.23	0.761
MTHFR deficiency	1	20	60	0.05	-0.23	0.817
NAD+ biosynthetic pathways	1	20	37	0.05	-0.23	0.695
Vitamin D in inflammatory diseases	1	20	25	0.05	-0.23	0.839
Focal adhesion: PI3K-Akt-mTOR-signaling pathway	12	206	305	0.0583	-0.24	0.813
Aripiprazole metabolic pathway	0	1	7	0	-0.26	0.932
Caffeine and theobromine metabolism	0	1	18	0	-0.26	0.993
Catalytic cycle of mammalian flavin-containing monooxygenases (FMOs)	0	1	14	0	-0.26	0.997
COVID-19, thrombosis and anticoagulation	0	1	27	0	-0.26	0.801
Diclofenac metabolic pathway	0	1	12	0	-0.26	0.995
Downregulation of ACE2 expression by SARS-CoV infection and SARS-CoV spike protein	0	1	8	0	-0.26	0.964
Evolocumab mechanism to reduce LDL cholesterol	0	1	5	0	-0.26	0.8
FABP4 in ovarian cancer	0	1	3	0	-0.26	0.479
Glucose homeostasis	0	1	24	0	-0.26	0.882
Hormonal control of pubertal growth spurt	0	1	8	0	-0.26	0.967
Influenza A virus infection	0	1	16	0	-0.26	0.996
Model for regulation of MSMP expression in cancer cells and its proangiogenic role in ovarian tumors	0	1	6	0	-0.26	0.883
Neurotransmitter disorders	0	1	27	0	-0.26	0.79
Nicotine metabolism in liver cells	0	1	18	0	-0.26	0.991
PCSK9-mediated LDL receptor degradation	0	1	3	0	-0.26	0.496
Soluble ACE2-mediated cell entry of SARS-CoV-2	0	1	7	0	-0.26	0.93
Epithelial to mesenchymal transition in colorectal cancer	6	107	163	0.0561	-0.26	0.788
Genes controlling nephrogenesis	1	21	45	0.0476	-0.28	0.821
Physiological and pathological hypertrophy of the heart	1	21	27	0.0476	-0.28	0.801
S1P receptor signal transduction	1	21	26	0.0476	-0.28	0.837
Sphingolipid metabolism overview	1	21	55	0.0476	-0.28	0.831
Microtubule cytoskeleton regulation	2	39	47	0.0513	-0.28	0.819
TNF-related weak inducer of apoptosis (TWEAK) signaling pathway	2	39	45	0.0513	-0.28	0.791
ErbB signaling pathway	4	75	101	0.0533	-0.32	0.768
Ethanol effects on histone modifications	1	22	53	0.0455	-0.33	0.809
Heart development	1	22	48	0.0455	-0.33	0.782
Immune response to tuberculosis	1	22	24	0.0455	-0.33	0.813
Sphingolipid metabolism: integrated pathway	1	22	97	0.0455	-0.33	0.775
Neurodegeneration with brain iron accumulation (NBIA) subtypes pathway	2	41	77	0.0488	-0.36	0.679
Thymic stromal lymphopoietin (TSLP) signaling pathway	2	41	49	0.0488	-0.36	0.764
Proteasome degradation	3	59	67	0.0508	-0.36	0.727
Amino acid metabolism pathway excerpt: histidine catabolism extension	0	2	23	0	-0.36	0.848
Butyrate-induced histone acetylation	0	2	11	0	-0.36	0.972
Fatty acid omega-oxidation	0	2	20	0	-0.36	0.93
Gastric acid production	0	2	22	0	-0.36	0.876
HIPK2 in kidney fibrosis	0	2	8	0	-0.36	0.847
MED and pseudoachondroplasia genes	0	2	7	0	-0.36	0.778
Mevalonate arm of cholesterol biosynthesis pathway with inhibitors	0	2	64	0	-0.36	0.705
MicroRNA network associated with chronic lymphocytic leukemia	0	2	10	0	-0.36	0.938
Nicotine effect on chromaffin cells	0	2	10	0	-0.36	0.94
Polyol pathway	0	2	17	0	-0.36	0.981
Secretion of hydrochloric acid in parietal cells	0	2	15	0	-0.36	0.988
Tamoxifen metabolism	0	2	37	0	-0.36	0.648
Thyroxine (thyroid hormone) production	0	2	12	0	-0.36	0.968
16p11.2 distal deletion syndrome	1	23	46	0.0435	-0.37	0.676
Canonical and non-canonical Notch signaling	1	23	31	0.0435	-0.37	0.687
Cardiac progenitor differentiation	1	23	56	0.0435	-0.37	0.72
EPO receptor signaling	1	23	27	0.0435	-0.37	0.731
FGFR3 signaling in chondrocyte proliferation and terminal differentiation	1	23	29	0.0435	-0.37	0.711
Relationship between inflammation, COX-2 and EGFR	1	23	29	0.0435	-0.37	0.7
Interleukin-1 (IL-1) structural pathway	2	42	52	0.0476	-0.39	0.741
Intraflagellar transport proteins binding to dynein	1	24	28	0.0417	-0.42	0.684
Lipid metabolism pathway	1	24	43	0.0417	-0.42	0.638
Mitochondrial immune response to SARS-CoV-2	1	24	62	0.0417	-0.42	0.699
TLR4 signaling and tolerance	1	24	30	0.0417	-0.42	0.667
Tryptophan metabolism	1	24	140	0.0417	-0.42	0.713
PI3K-Akt signaling pathway	12	217	359	0.0553	-0.43	0.695
IL-3 signaling pathway	2	43	50	0.0465	-0.43	0.679
GPCRs, class A rhodopsin-like	5	97	272	0.0515	-0.44	0.672
Sudden infant death syndrome (SIDS) susceptibility pathways	5	97	182	0.0515	-0.44	0.66
Arylamine metabolism	0	3	13	0	-0.45	0.953
Control of immune tolerance by vasoactive intestinal peptide	0	3	16	0	-0.45	0.953
Conversion of angiotensinogen to angiotensin II	0	3	9	0	-0.45	0.743
Direct reversal repair	0	3	4	0	-0.45	0.159
Eicosanoid metabolism via cytochrome P450 monooxygenases (CYP) pathway	0	3	23	0	-0.45	0.821
eIF5A regulation in response to inhibition of the nuclear export system	0	3	6	0	-0.45	0.396
Ethylmalonic encephalopathy	0	3	20	0	-0.45	0.882
Glycine metabolism	0	3	19	0	-0.45	0.913
Hypothetical craniofacial development pathway	0	3	11	0	-0.45	0.878
Kinin-Kallikrein pathway	0	3	10	0	-0.45	0.823
Oxytocin signaling	0	3	10	0	-0.45	0.808
SARS-CoV-2 altering angiogenesis via NRP1	0	3	11	0	-0.45	0.874
SARS-CoV-2 and angiotensin-converting enzyme 2 receptor: molecular mechanisms	0	3	14	0	-0.45	0.95
Serotonin receptor 2 and STAT3 signaling	0	3	6	0	-0.45	0.375
Somitogenesis in the context of spondylocostal dysostosis	0	3	10	0	-0.45	0.799
Vitamins A and D - action mechanisms	0	3	14	0	-0.45	0.956
Vitamin B6-dependent and responsive disorders	0	3	29	0	-0.45	0.661
Non-small cell lung cancer	3	62	88	0.0484	-0.45	0.631
Interactions of natural killer cells in pancreatic cancer	1	25	43	0.04	-0.46	0.614
Photodynamic therapy-induced unfolded protein response	1	25	28	0.04	-0.46	0.682
Sphingolipid metabolism in senescence	1	25	49	0.04	-0.46	0.617
Type I collagen synthesis in the context of osteogenesis imperfecta	1	25	36	0.04	-0.46	0.632
T-cell antigen receptor (TCR) pathway during Staphylococcus aureus infection	2	44	70	0.0455	-0.46	0.649
Hepatitis B infection	6	117	155	0.0513	-0.49	0.605
Signal transduction through IL1R	1	26	34	0.0385	-0.5	0.619
Type II interferon signaling (IFNG)	1	26	38	0.0385	-0.5	0.591
Hippo-Merlin signaling dysregulation	4	82	121	0.0488	-0.5	0.62
Integrin-mediated cell adhesion	4	82	102	0.0488	-0.5	0.647
Metapathway biotransformation Phase I and II	4	82	191	0.0488	-0.5	0.639
Aflatoxin B1 metabolism	0	4	16	0	-0.52	0.88
GABA metabolism (aka GHB)	0	4	42	0	-0.52	0.589
Ketone bodies synthesis and degradation	0	4	13	0	-0.52	0.858
let-7 inhibition of ES cell reprogramming	0	4	17	0	-0.52	0.881
Linoleic acid metabolism affected by coronavirus infection	0	4	28	0	-0.52	0.681
Metabolism of alpha-linolenic acid	0	4	27	0	-0.52	0.691
miR-222 in exercise-induced cardiac growth	0	4	5	0	-0.52	0.173
Peroxiredoxin 2 induced ovarian failure	0	4	13	0	-0.52	0.846
Peroxisomal beta-oxidation of tetracosanoyl-CoA	0	4	17	0	-0.52	0.903
Robo4 and VEGF signaling pathways crosstalk	0	4	7	0	-0.52	0.328
Somatic sex determination	0	4	15	0	-0.52	0.891
Tgif disruption of Shh signaling	0	4	10	0	-0.52	0.646
Peptide GPCRs	1	27	79	0.037	-0.54	0.573
Sphingolipid pathway	1	27	63	0.037	-0.54	0.618
Toll-like receptor signaling related to MyD88	1	27	32	0.037	-0.54	0.632
VEGFA-VEGFR2 signaling pathway	20	362	436	0.0552	-0.56	0.599
Modulators of TCR signaling and T cell activation	2	47	66	0.0426	-0.56	0.642
Clear cell renal cell carcinoma pathways	3	66	92	0.0455	-0.56	0.58
G protein signaling pathways	3	66	97	0.0455	-0.56	0.586
Arachidonate epoxygenase / epoxide hydrolase	0	5	18	0	-0.58	0.818
Benzo(a)pyrene metabolism	0	5	17	0	-0.58	0.845
Biogenic amine synthesis	0	5	33	0	-0.58	0.613
Cell-type dependent selectivity of CCK2R signaling	0	5	26	0	-0.58	0.659
Cholesterol biosynthesis with skeletal dysplasias	0	5	23	0	-0.58	0.724
Codeine and morphine metabolism	0	5	25	0	-0.58	0.665
Drug induction of bile acid pathway	0	5	45	0	-0.58	0.52
Effects of nitric oxide	0	5	16	0	-0.58	0.843
Folate-alcohol and cancer pathway hypotheses	0	5	24	0	-0.58	0.702
FTO obesity variant mechanism	0	5	11	0	-0.58	0.563
Glial cell differentiation	0	5	9	0	-0.58	0.365
GPCRs, class C metabotropic glutamate, pheromone	0	5	15	0	-0.58	0.805
mir-124 predicted interactions with cell cycle and differentiation	0	5	8	0	-0.58	0.301
Osteoblast signaling	0	5	18	0	-0.58	0.824
PTF1A related regulatory pathway	0	5	12	0	-0.58	0.651
TCA cycle nutrient use and invasiveness of ovarian cancer	0	5	11	0	-0.58	0.565
BDNF-TrkB signaling	1	28	38	0.0357	-0.58	0.565
Glycerophospholipid biosynthetic pathway	1	28	107	0.0357	-0.58	0.583
Amyotrophic lateral sclerosis (ALS)	1	29	56	0.0345	-0.62	0.511
Hepatocyte growth factor receptor signaling	1	29	35	0.0345	-0.62	0.622
Neovascularisation processes	1	29	42	0.0345	-0.62	0.536
Thyroid hormones production and peripheral downstream signaling effects	3	68	134	0.0441	-0.62	0.506
GPCRs, other	2	49	114	0.0408	-0.62	0.559
IL-4 signaling pathway	2	49	55	0.0408	-0.62	0.495
Acetylcholine synthesis	0	6	18	0	-0.63	0.722
ATR signaling	0	6	10	0	-0.63	0.369
Bile acids synthesis and enterohepatic circulation	0	6	18	0	-0.63	0.713
Biomarkers for urea cycle disorders	0	6	51	0	-0.63	0.459
BMP2-WNT4-FOXO1 pathway in primary endometrial stromal cell differentiation	0	6	16	0	-0.63	0.683
Degradation pathway of sphingolipids, including diseases	0	6	41	0	-0.63	0.513
exRNA mechanism of action and biogenesis	0	6	8	0	-0.63	0.206
Gene regulatory network modelling somitogenesis	0	6	13	0	-0.63	0.526
Heme biosynthesis	0	6	28	0	-0.63	0.649
Insulin signaling in adipocytes (diabetic condition)	0	6	12	0	-0.63	0.466
Insulin signaling in adipocytes (normal condition)	0	6	15	0	-0.63	0.636
Krebs cycle disorders	0	6	34	0	-0.63	0.584
Lipid particles composition	0	6	21	0	-0.63	0.697
Liver X receptor pathway	0	6	12	0	-0.63	0.484
Metastatic brain tumor	0	6	28	0	-0.63	0.653
MicroRNA for targeting cancer growth and vascularization in glioblastoma	0	6	10	0	-0.63	0.351
miRNA biogenesis	0	6	7	0	-0.63	0.205
Mitochondrial fatty acid synthesis pathway	0	6	21	0	-0.63	0.694
Molybdenum cofactor (Moco) biosynthesis	0	6	21	0	-0.63	0.668
Pilocytic astrocytoma	0	6	14	0	-0.63	0.586
SARS-CoV-2 B.1.1.7 variant antagonises innate immune activation	0	6	15	0	-0.63	0.61
Serotonin transporter activity	0	6	15	0	-0.63	0.656
Somatroph axis (GH) and its relationship to dietary restriction and aging	0	6	12	0	-0.63	0.491
G13 signaling pathway	1	30	39	0.0333	-0.66	0.558
Oxidative damage response	1	30	44	0.0333	-0.66	0.499
Prostaglandin synthesis and regulation	1	30	61	0.0333	-0.66	0.481
15q11.2 copy number variation syndrome	0	7	13	0	-0.68	0.417
ACE inhibitor pathway	0	7	29	0	-0.68	0.65
Activation of NLRP3 inflammasome by SARS-CoV-2	0	7	10	0	-0.68	0.286
Altered glycosylation of MUC1 in tumor microenvironment	0	7	10	0	-0.68	0.287
Cellular proteostasis	0	7	15	0	-0.68	0.517
Cerebral organic acidurias, including diseases	0	7	46	0	-0.68	0.472
DDX1 as a regulatory component of the Drosha microprocessor	0	7	8	0	-0.68	0.204
EDA signaling in hair follicle development	0	7	15	0	-0.68	0.528
EV release from cardiac cells and their functional effects	0	7	17	0	-0.68	0.624
SARS-CoV-2 and COVID-19 pathway	0	7	70	0	-0.68	0.557
Valproic acid pathway	0	7	36	0	-0.68	0.593
Overview of leukocyte-intrinsic Hippo pathway functions	1	31	37	0.0323	-0.69	0.618
Photodynamic therapy-induced HIF-1 survival signaling	1	31	38	0.0323	-0.69	0.543
Pre-implantation embryo	1	31	60	0.0323	-0.69	0.493
Splicing factor NOVA regulated synaptic proteins	1	31	44	0.0323	-0.69	0.506
Chemokine signaling pathway	6	127	172	0.0472	-0.7	0.502
Glycogen synthesis and degradation	1	32	54	0.0313	-0.73	0.411
Hedgehog signaling pathway	1	32	44	0.0313	-0.73	0.459
Alanine and aspartate metabolism	0	8	66	0	-0.73	0.456
ApoE and miR-146 in inflammation and atherosclerosis	0	8	13	0	-0.73	0.336
Bone morphogenic protein (BMP) signaling and regulation	0	8	13	0	-0.73	0.35
Canonical NF-kB pathway	0	8	9	0	-0.73	0.215
Dual hijack model of Vif in HIV infection	0	8	10	0	-0.73	0.261
Hijack of ubiquitination by SARS-CoV-2	0	8	12	0	-0.73	0.338
Ketogenesis and ketolysis	0	8	27	0	-0.73	0.612
Macrophage markers	0	8	10	0	-0.73	0.245
Mitochondrial complex II assembly	0	8	10	0	-0.73	0.274
NAD biosynthesis II (from tryptophan)	0	8	34	0	-0.73	0.616
Nanomaterial-induced inflammasome activation	0	8	13	0	-0.73	0.337
Nicotine effect on dopaminergic neurons	0	8	31	0	-0.73	0.591
NIPBL role in DNA damage - Cornelia de Lange syndrome	0	8	9	0	-0.73	0.222
Non-homologous end joining	0	8	11	0	-0.73	0.285
Omega-9 fatty acid synthesis	0	8	44	0	-0.73	0.474
Serotonin and anxiety-related events	0	8	16	0	-0.73	0.446
Supression of HMGB1 mediated inflammation by THBD	0	8	10	0	-0.73	0.278
Complement system in neuronal development and plasticity	3	73	137	0.0411	-0.75	0.437
Host-pathogen interaction of human coronaviruses - MAPK signaling	1	33	43	0.0303	-0.76	0.477
Ras signaling	6	130	192	0.0462	-0.76	0.444
Aerobic glycolysis	0	9	35	0	-0.77	0.613
Biotin metabolism, including IEMs	0	9	38	0	-0.77	0.537
Cytokines and inflammatory response	0	9	32	0	-0.77	0.57
Familial hyperlipidemia type 2	0	9	36	0	-0.77	0.588
Familial hyperlipidemia type 3	0	9	24	0	-0.77	0.533
Familial hyperlipidemia type 5	0	9	28	0	-0.77	0.592
GDNF/RET signaling axis	0	9	24	0	-0.77	0.557
Genes targeted by miRNAs in adipocytes	0	9	19	0	-0.77	0.373
Inclusion body myositis	0	9	27	0	-0.77	0.585
lncRNA-mediated mechanisms of therapeutic resistance	0	9	14	0	-0.77	0.271
Major receptors targeted by epinephrine and norepinephrine	0	9	34	0	-0.77	0.602
Mammary gland development pathway - Embryonic development (Stage 1 of 4)	0	9	21	0	-0.77	0.444
Methionine metabolism leading to sulfur amino acids and related disorders	0	9	46	0	-0.77	0.464
Nod-like receptor (NLR) signaling pathway	0	9	11	0	-0.77	0.249
SRF and miRs in smooth muscle differentiation and proliferation	0	9	18	0	-0.77	0.354
TCA cycle in senescence	0	9	30	0	-0.77	0.624
Vitamin B12 disorders	0	9	36	0	-0.77	0.563
Cancer immunotherapy by CTLA4 blockade	0	10	21	0	-0.81	0.341
Differentiation of white and brown adipocyte	0	10	26	0	-0.81	0.514
Dopaminergic neurogenesis	0	10	32	0	-0.81	0.597
Familial hyperlipidemia type 1	0	10	35	0	-0.81	0.555
MAPK and NFkB signaling pathways inhibited by Yersinia YopJ	0	10	13	0	-0.81	0.232
Trans-sulfuration pathway	0	10	25	0	-0.81	0.506
Nonalcoholic fatty liver disease	6	133	170	0.0451	-0.82	0.45
Pathways affected in adenoid cystic carcinoma	2	56	72	0.0357	-0.82	0.428
Nucleotide-binding oligomerization domain (NOD) pathway	1	35	43	0.0286	-0.83	0.477
Target of rapamycin (TOR) signaling	1	35	40	0.0286	-0.83	0.512
Calcium regulation in cardiac cells	4	96	167	0.0417	-0.84	0.406
Aspirin and miRNAs	0	11	24	0	-0.85	0.373
Cell differentiation - index	0	11	61	0	-0.85	0.349
Development of pulmonary dendritic cells and macrophage subsets	0	11	14	0	-0.85	0.256
ERK pathway in Huntington's disease	0	11	17	0	-0.85	0.219
FGF23 signaling in hypophosphatemic rickets and related disorders	0	11	28	0	-0.85	0.507
GPR40 pathway	0	11	20	0	-0.85	0.253
Hedgehog signaling pathway Netpath	0	11	17	0	-0.85	0.206
Leptin-insulin signaling overlap	0	11	20	0	-0.85	0.253
Omega-3 / omega-6 fatty acid synthesis	0	11	53	0	-0.85	0.408
Osteoclast signaling	0	11	21	0	-0.85	0.28
Purine metabolism	0	11	94	0	-0.85	0.438
RalA downstream regulated genes	0	11	13	0	-0.85	0.243
Serotonin and anxiety	0	11	22	0	-0.85	0.296
Small ligand GPCRs	0	11	25	0	-0.85	0.438
Transcriptional cascade regulating adipogenesis	0	11	14	0	-0.85	0.25
Proximal tubule transport	1	36	86	0.0278	-0.86	0.427
Apoptosis modulation and signaling	3	78	97	0.0385	-0.87	0.389
Development and heterogeneity of the ILC family	0	12	33	0	-0.89	0.513
Familial hyperlipidemia type 4	0	12	36	0	-0.89	0.474
GABA receptor signaling	0	12	57	0	-0.89	0.356
Ganglio sphingolipid metabolism	0	12	56	0	-0.89	0.353
GPCRs, class B secretin-like	0	12	24	0	-0.89	0.282
Kennedy pathway from sphingolipids	0	12	35	0	-0.89	0.477
Mammary gland development pathway - Puberty (Stage 2 of 4)	0	12	15	0	-0.89	0.178
Mevalonate arm of cholesterol biosynthesis pathway	0	12	55	0	-0.89	0.371
OSX and miRNAs in tooth development	0	12	39	0	-0.89	0.469
RAC1/PAK1/p38/MMP2 pathway	2	59	74	0.0339	-0.9	0.355
Cytoplasmic ribosomal proteins	3	80	89	0.0375	-0.92	0.39
Ectoderm differentiation	4	100	145	0.04	-0.92	0.334
Cholesterol biosynthesis pathway	0	13	32	0	-0.93	0.447
Extracellular vesicles in the crosstalk of cardiac cells	0	13	30	0	-0.93	0.413
Galanin receptor pathway	0	13	22	0	-0.93	0.172
MAP3K1 role in promoting and blocking gonadal determination	0	13	18	0	-0.93	0.146
miR-509-3p alteration of YAP1/ECM axis	0	13	19	0	-0.93	0.138
Osteopontin signaling	0	13	14	0	-0.93	0.192
TCA cycle and deficiency of pyruvate dehydrogenase complex (PDHc)	0	13	37	0	-0.93	0.479
Endoderm differentiation	4	101	147	0.0396	-0.95	0.331
Interleukin-11 signaling pathway	1	39	45	0.0256	-0.95	0.409
Cell differentiation - expanded index	0	14	69	0	-0.96	0.286
Constitutive androstane receptor pathway	0	14	34	0	-0.96	0.385
Mitochondrial gene expression	0	14	23	0	-0.96	0.185
Riboflavin and CoQ disorders	0	14	59	0	-0.96	0.346
Complement system	2	62	143	0.0323	-0.98	0.312
Androgen receptor signaling pathway	3	83	90	0.0361	-0.99	0.345
Thermogenesis	3	83	140	0.0361	-0.99	0.338
EGF/EGFR signaling pathway	6	142	163	0.0423	-0.99	0.312
Apoptosis modulation by HSP70	0	15	22	0	-1	0.151
Imatinib and chronic myeloid leukemia	0	15	25	0	-1	0.187
Serotonin receptor 4/6/7 and NR3C signaling	0	15	22	0	-1	0.149
Transcription factor regulation in adipogenesis	0	15	24	0	-1	0.186
Type II diabetes mellitus	0	15	28	0	-1	0.245
Eicosanoid synthesis	0	16	57	0	-1.03	0.349
Kynurenine pathway and links to cell senescence	0	16	56	0	-1.03	0.331
Ovarian infertility	0	16	33	0	-1.03	0.259
PI3K/AKT/mTOR - VitD3 signaling	0	16	34	0	-1.03	0.301
Pregnane X receptor pathway	0	16	35	0	-1.03	0.308
TP53 network	0	16	23	0	-1.03	0.146
Energy metabolism	1	42	49	0.0238	-1.03	0.361
Exercise-induced circadian regulation	1	42	49	0.0238	-1.03	0.38
Translation inhibitors in chronically activated PDGFRA cells	1	42	49	0.0238	-1.03	0.359
T-cell receptor (TCR) signaling pathway	2	65	93	0.0308	-1.05	0.311
Endoplasmic reticulum stress response in coronavirus infection	1	43	57	0.0233	-1.06	0.322
Proteoglycan biosynthesis	0	17	36	0	-1.06	0.295
RAS and bradykinin pathways in COVID-19	0	17	51	0	-1.06	0.341
TCA cycle (aka Krebs or citric acid cycle)	0	17	49	0	-1.06	0.34
Transcription co-factors SKI and SKIL protein partners	0	17	19	0	-1.06	0.118
Triacylglyceride synthesis	0	17	37	0	-1.06	0.273
Myometrial relaxation and contraction pathways	4	107	161	0.0374	-1.07	0.285
Synaptic signaling pathways associated with autism spectrum disorder	1	44	55	0.0227	-1.09	0.337
Hypothesized pathways in pathogenesis of cardiovascular disease	0	18	27	0	-1.09	0.187
Inhibition of exosome biogenesis and secretion by Manumycin A in CRPC cells	0	18	19	0	-1.09	0.106
mBDNF and proBDNF regulation of GABA neurotransmission	0	18	40	0	-1.09	0.248
Purine metabolism and related disorders	0	18	139	0	-1.09	0.272
Selective expression of chemokine receptors during T-cell polarization	0	18	30	0	-1.09	0.158
Urea cycle and associated pathways	0	18	81	0	-1.09	0.263
Vitamin A and carotenoid metabolism	0	18	65	0	-1.09	0.307
Prolactin signaling pathway	2	67	79	0.0299	-1.1	0.26
Wnt signaling pathway	1	45	52	0.0222	-1.11	0.332
Genes related to primary cilium development (based on CRISPR)	3	89	104	0.0337	-1.12	0.285
Corticotropin-releasing hormone signaling pathway	2	68	98	0.0294	-1.12	0.287
Hippo signaling regulation pathways	2	68	104	0.0294	-1.12	0.275
Leptin signaling pathway	2	68	77	0.0294	-1.12	0.23
15q13.3 copy number variation syndrome	0	19	40	0	-1.12	0.276
Angiotensin II receptor type 1 pathway	0	19	37	0	-1.12	0.197
Disruption of postsynaptic signaling by CNV	0	19	35	0	-1.12	0.18
Hematopoietic stem cell gene regulation by GABP alpha/beta complex	0	19	26	0	-1.12	0.152
Angiopoietin-like protein 8 regulatory pathway	4	110	157	0.0364	-1.13	0.263
Amino acid metabolism	2	69	205	0.029	-1.15	0.265
Hippo-Yap signaling pathway	0	20	24	0	-1.15	0.111
Host-pathogen interaction of human coronaviruses - apoptosis	0	20	34	0	-1.15	0.137
Host-pathogen interaction of human coronaviruses - autophagy	0	20	23	0	-1.15	0.144
miRNA regulation of p53 pathway in prostate cancer	0	20	37	0	-1.15	0.155
Regulation of apoptosis by parathyroid hormone-related protein	0	20	24	0	-1.15	0.141
T cell receptor and co-stimulatory signaling	0	20	45	0	-1.15	0.254
DNA damage response (only ATM dependent)	3	91	118	0.033	-1.16	0.264
Fragile X syndrome	3	91	133	0.033	-1.16	0.255
Cannabinoid receptor signaling	0	21	54	0	-1.18	0.271
Glycerolipids and glycerophospholipids	0	21	52	0	-1.18	0.291
Monoamine transport	0	21	47	0	-1.18	0.26
Striated muscle contraction pathway	0	21	39	0	-1.18	0.136
Insulin signaling	5	134	162	0.0373	-1.2	0.213
Ebola virus pathway in host	4	114	141	0.0351	-1.21	0.201
Translation factors	1	49	51	0.0204	-1.21	0.245
MicroRNAs in cardiomyocyte hypertrophy	2	73	109	0.0274	-1.24	0.226
Common pathways underlying drug addiction	0	23	50	0	-1.24	0.208
Development of ureteric collection system	0	23	63	0	-1.24	0.273
Follicle stimulating hormone (FSH) signaling pathway	0	23	28	0	-1.24	0.127
Mammary gland development pathway - Pregnancy and lactation (Stage 3 of 4)	0	23	42	0	-1.24	0.151
Prostaglandin and leukotriene metabolism in senescence	0	23	57	0	-1.24	0.216
Unfolded protein response	0	23	28	0	-1.24	0.126
Interferon type I signaling pathways	1	50	57	0.02	-1.24	0.233
Gastrin signaling pathway	3	96	115	0.0313	-1.26	0.227
mRNA processing	4	117	130	0.0342	-1.26	0.206
Extracellular vesicle-mediated signaling in recipient cells	0	24	31	0	-1.26	0.095
IL-17 signaling pathway	0	24	33	0	-1.26	0.101
Melatonin metabolism and effects	0	24	64	0	-1.26	0.248
White fat cell differentiation	0	24	35	0	-1.26	0.105
Autophagy	0	25	33	0	-1.29	0.097
Regucalcin in proximal tubule epithelial kidney cells	0	25	68	0	-1.29	0.21
Cytosolic DNA-sensing pathway	1	54	77	0.0185	-1.33	0.201
Kisspeptin/kisspeptin receptor system in the ovary	0	27	49	0	-1.34	0.124
Alpha 6 beta 4 signaling pathway	0	28	34	0	-1.36	0.089
NO/cGMP/PKG mediated neuroprotection	0	28	65	0	-1.36	0.216
Renin-angiotensin-aldosterone system (RAAS)	0	28	57	0	-1.36	0.156
Initiation of transcription and translation elongation at the HIV-1 LTR	0	29	35	0	-1.39	0.094
PI3K-AKT-mTOR signaling pathway and therapeutic opportunities	0	29	33	0	-1.39	0.089
Factors and pathways affecting insulin-like growth factor (IGF1)-Akt signaling	0	30	43	0	-1.41	0.093
Type 2 papillary renal cell carcinoma	0	30	41	0	-1.41	0.104
Synaptic vesicle pathway	0	31	59	0	-1.44	0.109
Mitochondrial complex IV assembly	0	32	40	0	-1.46	0.099
Glycolysis and gluconeogenesis	0	33	69	0	-1.48	0.114
T-cell activation SARS-CoV-2	1	61	98	0.0164	-1.49	0.127
Mechanoregulation and pathology of YAP/TAZ via Hippo and non-Hippo mechanisms	0	34	47	0	-1.5	0.07
Eukaryotic transcription initiation	0	35	42	0	-1.53	0.089
Joubert syndrome	1	63	87	0.0159	-1.53	0.122
Rett syndrome causing genes	0	36	60	0	-1.55	0.076
TGF-beta signaling pathway	3	113	133	0.0265	-1.58	0.105
Phosphoinositides metabolism	0	39	89	0	-1.61	0.096
Ciliopathies	4	137	184	0.0292	-1.61	0.079
Acute viral myocarditis	1	70	110	0.0143	-1.67	0.089
Neuroinflammation and glutamatergic signaling	2	95	178	0.0211	-1.67	0.099
Alzheimer's disease	7	207	288	0.0338	-1.71	0.086
Cardiac hypertrophic response	0	44	61	0	-1.71	0.065
Alzheimer's disease and miRNA effects	7	208	358	0.0337	-1.73	0.079
Notch signaling pathway (Netpath)	0	49	62	0	-1.81	0.055
B cell receptor signaling pathway	1	79	99	0.0127	-1.83	0.046
Mitochondrial complex I assembly model OXPHOS system	0	53	61	0	-1.88	0.04
Oxidative phosphorylation	0	61	68	0	-2.02	0.027
Sterol regulatory element-binding proteins (SREBP) signaling	0	63	77	0	-2.05	0.026
Electron transport chain: OXPHOS system in mitochondria	0	98	119	0	-2.56	0.006
Acrylamide biotransformation and exposure biomarkers	0	0	10	NaN%	NaN	0
Amino acid conjugation of benzoic acid	0	0	15	NaN%	NaN	0
Amino acid conjugation	0	0	7	NaN%	NaN	0
Biochemical pathways: part I	0	0	471	NaN%	NaN	0
Blood clotting and drug effects	0	0	13	NaN%	NaN	0
Colchicine metabolic pathway	0	0	5	NaN%	NaN	0
Felbamate metabolism	0	0	12	NaN%	NaN	0
Lidocaine metabolism	0	0	11	NaN%	NaN	0
Liver steatosis adverse outcome pathway	0	0	46	NaN%	NaN	0
Metabolism of dichloroethylene by CYP450	0	0	13	NaN%	NaN	0
Metabolism of tetrahydrocannabinol (THC)	0	0	11	NaN%	NaN	0
Metabolism overview	0	0	116	NaN%	NaN	0
Meta pathway lipodystrophy, dyslipidemia and hyperlipidemia	0	0	13	NaN%	NaN	0
Mitochondrial complex I inhibition leading to chemical-induced Fanconi syndrome	0	0	21	NaN%	NaN	0
Modified nucleosides derived from tRNA as urinary cancer markers	0	0	21	NaN%	NaN	0
Ophthalmate biosynthesis in hepatocytes	0	0	10	NaN%	NaN	0
Phosphatidylcholine catabolism	0	0	32	NaN%	NaN	0
Role of carnosine in muscle contraction	0	0	14	NaN%	NaN	0

## Sheet: THP1_Perfectha_Dm_adjPvalue005
Statistics results for Fri Dec 10 21:18:41 CET 2021
Dataset: J:\FHML_TGX\Danyel.Jennen\ProjectFolder\Projects\Filler-project\THP1_Perfectha\pathvisio\noflags\THP1_Perfectha_limma_OUTPUT_TABLE.pgex
Pathway directory: D:\wikipathways-20211110-gpml-Homo_sapiens
Gene database: D:\pathvisio-3.3.0\Hs_Derby_Ensembl_91.bridge
Criterion: [Dm_adj.P.Val] < 0.05
Calculation method: pathway-centric. Calculations are performed after mapping data to pathways.
Total data points (N): 8363
Data points meeting criterion (R): 431
Pathway	positive (r)	measured (n)	total	%	Z Score	p-value (permuted)
DNA replication	14	37	50	0.3784	9.01	0
Retinoblastoma gene in cancer	21	79	98	0.2658	8.66	0
G1 to S cell cycle control	17	58	68	0.2931	8.35	0
Pentose phosphate metabolism	3	5	21	0.6	5.55	0
Cell cycle	17	105	124	0.1619	5.15	0
Nuclear receptors meta-pathway	26	204	339	0.1275	4.96	0
Antiviral and anti-inflammatory effects of Nrf2 on SARS-CoV-2 pathway	6	23	50	0.2609	4.55	0
NRF2 pathway	14	92	145	0.1522	4.39	0
Ultraconserved region 339 modulation of tumor suppressor microRNAs in cancer	1	1	6	1	4.29	0.002
miRNAs involved in DNA damage response	6	25	70	0.24	4.27	0.001
Oxidative stress response	6	25	35	0.24	4.27	0
Ferroptosis	8	40	88	0.2	4.26	0
DNA IR-damage and cellular response via ATR	11	69	90	0.1594	4.07	0.001
Sulindac metabolic pathway	2	4	11	0.5	4.06	0.004
Fluoropyrimidine activity	6	27	58	0.2222	4.02	0.001
Transcriptional activation by NRF2 in response to phytochemicals	4	14	20	0.2857	3.97	0.005
Hepatitis C and hepatocellular carcinoma	8	45	63	0.1778	3.84	0.004
DNA mismatch repair	5	22	25	0.2273	3.73	0.003
Lamin A-processing pathway	2	5	8	0.4	3.53	0.01
Serine metabolism	2	5	43	0.4	3.53	0.001
TYROBP causal network in microglia	8	52	61	0.1538	3.35	0.003
miRNA regulation of DNA damage response	9	66	106	0.1364	3.13	0.007
ID signaling pathway	3	12	17	0.25	3.11	0.011
ATM signaling pathway	6	37	50	0.1622	3.05	0.007
Biomarkers for pyrimidine metabolism disorders	3	13	88	0.2308	2.93	0.009
Glucocorticoid receptor pathway	7	49	73	0.1429	2.9	0.006
Pluripotent stem cell differentiation pathway	4	21	64	0.1905	2.88	0.009
Biosynthesis and regeneration of tetrahydrobiopterin and catabolism of phenylalanine	1	2	38	0.5	2.87	0.013
Heroin metabolism	1	2	8	0.5	2.87	0.019
Tyrosine metabolism	1	2	27	0.5	2.87	0.011
COVID-19 adverse outcome pathway	2	7	24	0.2857	2.8	0.009
NRF2-ARE regulation	4	22	24	0.1818	2.77	0.023
Photodynamic therapy-induced NFE2L2 (NRF2) survival signaling	4	22	24	0.1818	2.77	0.019
p53 transcriptional gene network	7	53	78	0.1321	2.66	0.013
One-carbon metabolism	4	23	58	0.1739	2.66	0.009
Glutathione metabolism	3	15	57	0.2	2.6	0.019
Interactions between LOXL4 and oxidative stress pathway	3	15	19	0.2	2.6	0.012
Gastric cancer network 2	4	24	33	0.1667	2.55	0.013
DNA repair pathways, full network	11	106	125	0.1038	2.45	0.015
Nucleotide GPCRs	2	9	15	0.2222	2.32	0.036
Vitamin D-sensitive calcium signaling in depression	4	27	55	0.1481	2.27	0.022
Oxysterols derived from cholesterol	4	28	112	0.1429	2.19	0.031
Integrated cancer pathway	5	39	50	0.1282	2.17	0.028
Differentiation of white and brown adipocyte	2	10	26	0.2	2.12	0.029
Disorders of folate metabolism and transport	2	10	46	0.2	2.12	0.029
FOXP3 in COVID-19	2	10	19	0.2	2.12	0.035
Aryl hydrocarbon receptor pathway	4	29	49	0.1379	2.11	0.028
Nucleotide metabolism	3	19	37	0.1579	2.1	0.045
Adipogenesis	9	91	132	0.0989	2.05	0.025
Cohesin complex - Cornelia de Lange syndrome	4	31	37	0.129	1.96	0.056
Purinergic signaling	3	21	96	0.1429	1.9	0.047
Microglia pathogen phagocytosis pathway	4	33	44	0.1212	1.81	0.059
Homologous recombination	2	12	14	0.1667	1.81	0.053
Pyrimidine metabolism and related diseases	2	12	97	0.1667	1.81	0.051
Benzene metabolism	1	4	17	0.25	1.8	0.07
let-7 inhibition of ES cell reprogramming	1	4	17	0.25	1.8	0.073
SCFA and skeletal muscle substrate metabolism	1	4	17	0.25	1.8	0.077
Hair follicle development: cytodifferentiation - part 3 of 3	5	46	93	0.1087	1.76	0.058
DNA damage response	6	59	78	0.1017	1.75	0.051
Metabolic reprogramming in colon cancer	4	34	80	0.1176	1.75	0.065
Spinal cord injury	7	75	127	0.0933	1.64	0.115
Senescence and autophagy in cancer	8	91	112	0.0879	1.58	0.135
Interactions of natural killer cells in pancreatic cancer	3	25	43	0.12	1.55	0.064
Trans-sulfuration and one-carbon metabolism	3	25	66	0.12	1.55	0.064
Cysteine and methionine catabolism	2	14	74	0.1429	1.55	0.075
Caloric restriction and aging	1	5	13	0.2	1.5	0.058
Farnesoid X receptor pathway	1	5	21	0.2	1.5	0.098
Gamma-glutamyl cycle for the biosynthesis and degradation of glutathione, including diseases	1	5	24	0.2	1.5	0.103
Hfe effect on hepcidin production	1	5	8	0.2	1.5	0.112
Irinotecan pathway	1	5	18	0.2	1.5	0.072
Methylation pathways	1	5	15	0.2	1.5	0.077
miR-517 relationship with ARCN1 and USP1	1	5	7	0.2	1.5	0.115
Osteoblast signaling	1	5	18	0.2	1.5	0.087
Vitamin D receptor pathway	9	110	188	0.0818	1.45	0.157
TGF-beta signaling in thyroid cells for epithelial-mesenchymal transition	2	15	20	0.1333	1.43	0.084
Orexin receptor pathway	8	98	225	0.0816	1.36	0.175
Overview of nanoparticle effects	2	16	42	0.125	1.33	0.107
Pathways of nucleic acid metabolism and innate immune sensing	2	16	39	0.125	1.33	0.083
PPAR-alpha pathway	2	16	28	0.125	1.33	0.113
Overview of proinflammatory and profibrotic mediators	5	55	134	0.0909	1.32	0.18
Folate metabolism	4	42	142	0.0952	1.28	0.217
BMP2-WNT4-FOXO1 pathway in primary endometrial stromal cell differentiation	1	6	16	0.1667	1.28	0.085
Estrogen metabolism	1	6	45	0.1667	1.28	0.105
Glucuronidation	1	6	41	0.1667	1.28	0.095
HIF1A and PPARG regulation of glycolysis	1	6	19	0.1667	1.28	0.091
Phase I biotransformations, non P450	1	6	13	0.1667	1.28	0.11
Serotonin transporter activity	1	6	15	0.1667	1.28	0.107
IL1 and megakaryocytes in obesity	2	17	26	0.1176	1.23	0.134
Methionine de novo and salvage pathway	2	17	74	0.1176	1.23	0.268
Oligodendrocyte specification and differentiation, leading to myelin components for CNS	2	17	46	0.1176	1.23	0.125
Male infertility	7	87	150	0.0805	1.23	0.203
Burn wound healing	6	72	124	0.0833	1.23	0.214
Primary focal segmental glomerulosclerosis (FSGS)	5	59	77	0.0847	1.16	0.273
Pyrimidine metabolism	6	74	140	0.0811	1.15	0.249
Nuclear receptors in lipid metabolism and toxicity	2	18	48	0.1111	1.14	0.162
Urea cycle and metabolism of amino groups	2	18	71	0.1111	1.14	0.287
Parkin-ubiquitin proteasomal system pathway	5	60	75	0.0833	1.12	0.319
Dopamine metabolism	1	7	48	0.1429	1.09	0.265
LDLRAD4 and what we know about it	1	7	12	0.1429	1.09	0.179
Vitamin D metabolism	1	7	22	0.1429	1.09	0.119
Congenital generalized lipodystrophy (CGL)	2	19	31	0.1053	1.06	0.178
NAD metabolism in oncogene-induced senescence and mitochondrial dysfunction-associated senescence	2	19	46	0.1053	1.06	0.316
Selenium micronutrient network	5	62	198	0.0806	1.04	0.3
Overlap between signal transduction pathways contributing to LMNA laminopathies	4	48	73	0.0833	1	0.305
7-oxo-C and 7-beta-HC pathways	2	20	60	0.1	0.98	0.375
Hair follicle development: organogenesis - part 2 of 3	2	20	36	0.1	0.98	0.322
Nanoparticle triggered autophagic cell death	2	20	30	0.1	0.98	0.185
Progeria-associated lipodystrophy	2	20	36	0.1	0.98	0.348
Nephrotic syndrome	3	34	49	0.0882	0.97	0.411
IL-18 signaling pathway	14	212	288	0.066	0.97	0.348
Integrated breast cancer pathway	10	145	200	0.069	0.96	0.344
Acquired partial lipodystrophy / Barraquer-Simons syndrome	1	8	17	0.125	0.94	0.162
Bone morphogenic protein (BMP) signaling and regulation	1	8	13	0.125	0.94	0.228
IL-10 anti-inflammatory signaling pathway	1	8	19	0.125	0.94	0.147
Leptin and adiponectin	1	8	14	0.125	0.94	0.203
Mammary gland development pathway - Involution (Stage 4 of 4)	1	8	13	0.125	0.94	0.224
MFAP5-mediated ovarian cancer cell motility and invasiveness	1	8	18	0.125	0.94	0.151
Sulfation biotransformation reaction	1	8	29	0.125	0.94	0.211
Lung fibrosis	3	35	85	0.0857	0.92	0.317
Ebstein-Barr virus LMP1 signaling	2	21	25	0.0952	0.91	0.2
Apoptosis-related network due to altered Notch3 in ovarian cancer	4	51	54	0.0784	0.87	0.431
CCL18 signaling pathway	3	36	177	0.0833	0.86	0.413
Network map of SARS-CoV-2 signaling pathway	10	150	324	0.0667	0.85	0.394
Ethanol effects on histone modifications	2	22	53	0.0909	0.84	0.453
Heart development	2	22	48	0.0909	0.84	0.477
Prostaglandin signaling	2	22	40	0.0909	0.84	0.573
Wnt signaling in kidney disease	2	22	39	0.0909	0.84	0.563
DNA IR-double strand breaks and cellular response via ATM	4	52	65	0.0769	0.83	0.392
Cholesterol metabolism with Bloch and Kandutsch-Russell pathways	3	37	97	0.0811	0.81	0.469
NOTCH1 regulation of endothelial cell calcification	1	9	18	0.1111	0.81	0.209
Pathogenesis of SARS-CoV-2 mediated by nsp9-nsp10 complex	1	9	34	0.1111	0.81	0.571
Thiamine metabolic pathways	1	9	34	0.1111	0.81	0.583
Circadian rhythm genes	9	135	209	0.0667	0.8	0.461
16p11.2 distal deletion syndrome	2	23	46	0.087	0.77	0.551
Glycosylation and related congenital defects	2	23	73	0.087	0.77	0.387
Glioblastoma signaling pathways	5	70	88	0.0714	0.76	0.486
Neural crest differentiation	4	54	102	0.0741	0.75	0.486
One-carbon metabolism and related pathways	3	39	94	0.0769	0.72	0.512
Gastric cancer network 1	2	24	30	0.0833	0.71	0.62
Nuclear receptors	2	24	44	0.0833	0.71	0.545
Zinc homeostasis	2	24	39	0.0833	0.71	0.605
Ciliary landscape	12	192	215	0.0625	0.7	0.491
Cells and molecules involved in local acute inflammatory response	1	10	19	0.1	0.69	0.555
Cori cycle	1	10	53	0.1	0.69	0.481
Glycolysis in senescence	1	10	26	0.1	0.69	0.657
Iron metabolism in placenta	1	10	15	0.1	0.69	0.432
Mammalian disorder of sexual development	1	10	29	0.1	0.69	0.661
NAD metabolism, sirtuins and aging	1	10	16	0.1	0.69	0.488
Melanoma	4	56	78	0.0714	0.68	0.522
Nucleotide excision repair	3	40	44	0.075	0.67	0.613
TGF-beta receptor signaling	3	40	56	0.075	0.67	0.458
Phosphodiesterases in neuronal function	2	25	66	0.08	0.64	0.49
Thyroid stimulating hormone (TSH) signaling pathway	4	57	67	0.0702	0.64	0.478
Complement activation	1	11	24	0.0909	0.59	0.774
FGF23 signaling in hypophosphatemic rickets and related disorders	1	11	28	0.0909	0.59	0.687
Genes associated with the development of rheumatoid arthritis	1	11	22	0.0909	0.59	0.797
ncRNAs involved in STAT3 signaling in hepatocellular carcinoma	1	11	19	0.0909	0.59	0.824
Nitric oxide metabolism in cystic fibrosis	1	11	25	0.0909	0.59	0.728
Osteoclast signaling	1	11	21	0.0909	0.59	0.79
Purine metabolism	1	11	94	0.0909	0.59	0.563
Base excision repair	2	26	32	0.0769	0.59	0.675
Photodynamic therapy-induced NF-kB survival signaling	2	26	36	0.0769	0.59	0.612
Prion disease pathway	2	26	36	0.0769	0.59	0.643
Aryl hydrocarbon receptor Netpath	3	42	57	0.0714	0.58	0.497
PPAR signaling pathway	3	42	76	0.0714	0.58	0.616
VEGFA-VEGFR2 signaling pathway	21	362	436	0.058	0.57	0.563
Regulatory circuits of the STAT3 signaling pathway	4	59	79	0.0678	0.57	0.642
Endochondral ossification with skeletal dysplasias	3	43	69	0.0698	0.54	0.577
Endochondral ossification	3	43	69	0.0698	0.54	0.577
Pathogenic Escherichia coli infection	3	43	79	0.0698	0.54	0.68
TGF-beta receptor signaling in skeletal dysplasias	3	43	60	0.0698	0.54	0.52
CAMKK2 pathway	2	27	143	0.0741	0.53	0.623
Interactions between immune cells and microRNAs in tumor microenvironment	2	27	52	0.0741	0.53	0.585
Arrhythmogenic right ventricular cardiomyopathy	3	44	81	0.0682	0.5	0.691
Canonical and non-canonical TGF-B signaling	1	12	18	0.0833	0.5	0.951
FOXA2 pathway	1	12	23	0.0833	0.5	0.838
Globo sphingolipid metabolism	1	12	28	0.0833	0.5	0.71
Glycosaminoglycan degradation	1	12	45	0.0833	0.5	0.627
H19 action Rb-E2F1 signaling and CDK-Beta-catenin activity	1	12	17	0.0833	0.5	0.94
Metabolic pathway of LDL, HDL and TG, including diseases	1	12	34	0.0833	0.5	0.645
OSX and miRNAs in tooth development	1	12	39	0.0833	0.5	0.644
PKC-gamma calcium signaling pathway in ataxia	1	12	29	0.0833	0.5	0.713
Regulation of Wnt / B-catenin signaling by small molecule compounds	1	12	33	0.0833	0.5	0.65
Familial partial lipodystrophy (FPLD)	2	28	44	0.0714	0.48	0.61
Sudden infant death syndrome (SIDS) susceptibility pathways	6	97	182	0.0619	0.46	0.63
BMP signaling in eyelid development	1	13	23	0.0769	0.41	0.896
Mitochondrial long chain fatty acid beta-oxidation	1	13	24	0.0769	0.41	0.895
Monoamine GPCRs	1	13	43	0.0769	0.41	0.632
NAD+ metabolism	1	13	34	0.0769	0.41	0.667
Osteopontin signaling	1	13	14	0.0769	0.41	0.974
TCA cycle and deficiency of pyruvate dehydrogenase complex (PDHc)	1	13	37	0.0769	0.41	0.622
Hippo-Merlin signaling dysregulation	5	82	121	0.061	0.39	0.74
Physico-chemical features and toxicity-associated pathways	3	47	78	0.0638	0.38	0.75
Oxidative damage response	2	30	44	0.0667	0.38	0.66
Vitamin B12 metabolism	2	30	118	0.0667	0.38	0.74
Cancer immunotherapy by PD-1 blockade	1	14	35	0.0714	0.34	0.677
Kallmann syndrome	1	14	40	0.0714	0.34	0.636
Fibrin complement receptor 3 signaling pathway	2	31	47	0.0645	0.33	0.665
Pre-implantation embryo	2	31	60	0.0645	0.33	0.794
Splicing factor NOVA regulated synaptic proteins	2	31	44	0.0645	0.33	0.626
Allograft Rejection	3	49	113	0.0612	0.31	0.786
Malignant pleural mesothelioma	17	308	468	0.0552	0.3	0.768
Influence of laminopathies on Wnt signaling	2	32	45	0.0625	0.28	0.669
miRNAs involvement in the immune response in sepsis	2	32	69	0.0625	0.28	0.811
Parkinson's disease pathway	2	32	84	0.0625	0.28	0.736
Metabolism of spingolipids in ER and Golgi apparatus	1	15	72	0.0667	0.27	0.804
MFAP5 effect on permeability and motility of endothelial cells via cytoskeleton rearrangement	1	15	20	0.0667	0.27	0.992
miRNA targets in ECM and membrane receptors	1	15	46	0.0667	0.27	0.672
Mitochondrial complex III assembly	1	15	19	0.0667	0.27	0.996
Serotonin receptor 4/6/7 and NR3C signaling	1	15	22	0.0667	0.27	0.982
SREBF and miR33 in cholesterol and lipid homeostasis	1	15	19	0.0667	0.27	0.999
7q11.23 copy number variation syndrome	5	87	149	0.0575	0.25	0.791
Apoptosis	4	69	88	0.058	0.24	0.79
Wnt signaling pathway and pluripotency	4	69	106	0.058	0.24	0.842
Osteoblast differentiation and related diseases	4	70	119	0.0571	0.21	0.816
SARS-CoV-2 innate immunity evasion and cell-specific immune response	3	52	92	0.0577	0.2	0.826
IL-9 signaling pathway	1	16	18	0.0625	0.2	0.999
Inflammatory response pathway	1	16	34	0.0625	0.2	0.794
Nanomaterial induced apoptosis	1	16	31	0.0625	0.2	0.864
Ovarian infertility	1	16	33	0.0625	0.2	0.819
4-hydroxytamoxifen, Dexamethasone, and Retinoic Acids Regulation of p27 Expression	1	17	31	0.0588	0.14	0.896
Eicosanoid metabolism via cyclooxygenases (COX)	1	17	70	0.0588	0.14	0.928
Eicosanoid metabolism via lipooxygenases (LOX)	1	17	70	0.0588	0.14	0.912
TCA cycle (aka Krebs or citric acid cycle)	1	17	49	0.0588	0.14	0.84
Complement system in neuronal development and plasticity	4	73	137	0.0548	0.13	0.92
Bladder cancer	2	36	47	0.0556	0.11	0.887
Hypothesized pathways in pathogenesis of cardiovascular disease	1	18	27	0.0556	0.08	0.986
Purine metabolism and related disorders	1	18	139	0.0556	0.08	0.949
Wnt/beta-catenin signaling pathway in leukemia	1	18	29	0.0556	0.08	0.971
Fas ligand pathway and stress induction of heat shock proteins	2	37	48	0.0541	0.07	0.934
Nucleotide excision repair in xeroderma pigmentosum	3	56	62	0.0536	0.07	0.987
Non-genomic actions of 1,25 dihydroxyvitamin D3	3	57	97	0.0526	0.04	0.985
IL-6 signaling pathway	2	38	45	0.0526	0.03	0.957
Prader-Willi and Angelman syndrome	2	38	90	0.0526	0.03	0.968
Calcium regulation in cardiac cells	5	96	167	0.0521	0.02	0.982
Statin inhibition of cholesterol production	1	19	50	0.0526	0.02	0.983
STING pathway in Kawasaki-like disease and COVID-19	1	19	26	0.0526	0.02	0.998
Small cell lung cancer	4	77	104	0.0519	0.02	0.992
GPCRs, class A rhodopsin-like	5	97	272	0.0515	0	0.999
Mesodermal commitment pathway	5	97	154	0.0515	0	0.999
1q21.1 copy number variation syndrome	1	20	58	0.05	-0.03	0.986
MTHFR deficiency	1	20	60	0.05	-0.03	0.995
NAD+ biosynthetic pathways	1	20	37	0.05	-0.03	0.937
Vitamin D in inflammatory diseases	1	20	25	0.05	-0.03	0.997
TNF-alpha signaling pathway	4	80	97	0.05	-0.06	0.961
Ectoderm differentiation	5	100	145	0.05	-0.07	0.971
Monoamine transport	1	21	47	0.0476	-0.08	0.879
AGE/RAGE pathway	3	62	67	0.0484	-0.11	0.947
Complement system	3	62	143	0.0484	-0.11	0.917
Integrin-mediated cell adhesion	4	82	102	0.0488	-0.11	0.958
Interleukin-1 (IL-1) structural pathway	2	42	52	0.0476	-0.12	0.943
Cell migration and invasion through p75NTR	1	22	31	0.0455	-0.13	0.953
Endothelin pathways	1	22	48	0.0455	-0.13	0.83
Regulation of actin cytoskeleton	5	103	160	0.0485	-0.14	0.889
16p11.2 proximal deletion syndrome	3	63	152	0.0476	-0.14	0.896
ATM signaling in development and disease	2	43	49	0.0465	-0.15	0.861
Cardiac progenitor differentiation	1	23	56	0.0435	-0.18	0.927
Development of ureteric collection system	1	23	63	0.0435	-0.18	0.952
FGFR3 signaling in chondrocyte proliferation and terminal differentiation	1	23	29	0.0435	-0.18	0.945
IL-7 signaling pathway	1	23	26	0.0435	-0.18	0.982
Mammary gland development pathway - Pregnancy and lactation (Stage 3 of 4)	1	23	42	0.0435	-0.18	0.723
Oxidation by cytochrome P450	1	23	75	0.0435	-0.18	0.854
Head and neck squamous cell carcinoma	3	65	81	0.0462	-0.2	0.769
Effect of progerin on genes involved in Hutchinson-Gilford progeria syndrome	1	24	30	0.0417	-0.22	0.891
Extracellular vesicle-mediated signaling in recipient cells	1	24	31	0.0417	-0.22	0.857
Mitochondrial immune response to SARS-CoV-2	1	24	62	0.0417	-0.22	0.934
TLR4 signaling and tolerance	1	24	30	0.0417	-0.22	0.868
Aripiprazole metabolic pathway	0	1	7	0	-0.23	0.925
Caffeine and theobromine metabolism	0	1	18	0	-0.23	0.999
Catalytic cycle of mammalian flavin-containing monooxygenases (FMOs)	0	1	14	0	-0.23	0.998
COVID-19, thrombosis and anticoagulation	0	1	27	0	-0.23	0.94
Diclofenac metabolic pathway	0	1	12	0	-0.23	0.997
Downregulation of ACE2 expression by SARS-CoV infection and SARS-CoV spike protein	0	1	8	0	-0.23	0.956
Evolocumab mechanism to reduce LDL cholesterol	0	1	5	0	-0.23	0.773
FABP4 in ovarian cancer	0	1	3	0	-0.23	0.495
Glucose homeostasis	0	1	24	0	-0.23	0.981
Hormonal control of pubertal growth spurt	0	1	8	0	-0.23	0.95
Influenza A virus infection	0	1	16	0	-0.23	0.997
Model for regulation of MSMP expression in cancer cells and its proangiogenic role in ovarian tumors	0	1	6	0	-0.23	0.869
Neurotransmitter disorders	0	1	27	0	-0.23	0.945
Nicotine metabolism in liver cells	0	1	18	0	-0.23	0.999
PCSK9-mediated LDL receptor degradation	0	1	3	0	-0.23	0.493
Soluble ACE2-mediated cell entry of SARS-CoV-2	0	1	7	0	-0.23	0.915
Fatty acid beta-oxidation	1	25	71	0.04	-0.26	0.811
Sphingolipid metabolism in senescence	1	25	49	0.04	-0.26	0.733
Type I collagen synthesis in the context of osteogenesis imperfecta	1	25	36	0.04	-0.26	0.742
Thyroid hormones production and peripheral downstream signaling effects	3	68	134	0.0441	-0.28	0.799
Breast cancer pathway	5	110	167	0.0455	-0.29	0.788
Resistin as a regulator of inflammation	1	26	34	0.0385	-0.3	0.707
Embryonic stem cell pluripotency pathways	3	69	123	0.0435	-0.3	0.76
Amino acid metabolism pathway excerpt: histidine catabolism extension	0	2	23	0	-0.33	0.968
Butyrate-induced histone acetylation	0	2	11	0	-0.33	0.966
Fatty acid omega-oxidation	0	2	20	0	-0.33	0.995
Gastric acid production	0	2	22	0	-0.33	0.984
HIPK2 in kidney fibrosis	0	2	8	0	-0.33	0.813
Hypoxia-mediated EMT and stemness	0	2	6	0	-0.33	0.666
MED and pseudoachondroplasia genes	0	2	7	0	-0.33	0.739
Mevalonate arm of cholesterol biosynthesis pathway with inhibitors	0	2	64	0	-0.33	0.803
MicroRNA network associated with chronic lymphocytic leukemia	0	2	10	0	-0.33	0.923
Nicotine effect on chromaffin cells	0	2	10	0	-0.33	0.931
Polyol pathway	0	2	17	0	-0.33	0.999
Secretion of hydrochloric acid in parietal cells	0	2	15	0	-0.33	0.998
Tamoxifen metabolism	0	2	37	0	-0.33	0.68
Thyroxine (thyroid hormone) production	0	2	12	0	-0.33	0.978
GPCRs, other	2	49	114	0.0408	-0.34	0.755
MECP2 and associated Rett syndrome	2	49	114	0.0408	-0.34	0.749
Peptide GPCRs	1	27	79	0.037	-0.34	0.75
Novel intracellular components of RIG-I-like receptor (RLR) pathway	2	50	64	0.04	-0.37	0.788
BDNF-TrkB signaling	1	28	38	0.0357	-0.38	0.628
Glycerophospholipid biosynthetic pathway	1	28	107	0.0357	-0.38	0.713
Renin-angiotensin-aldosterone system (RAAS)	1	28	57	0.0357	-0.38	0.706
Arylamine metabolism	0	3	13	0	-0.4	0.946
Control of immune tolerance by vasoactive intestinal peptide	0	3	16	0	-0.4	0.984
Conversion of angiotensinogen to angiotensin II	0	3	9	0	-0.4	0.745
Direct reversal repair	0	3	4	0	-0.4	0.146
Eicosanoid metabolism via cytochrome P450 monooxygenases (CYP) pathway	0	3	23	0	-0.4	0.934
eIF5A regulation in response to inhibition of the nuclear export system	0	3	6	0	-0.4	0.355
Ethylmalonic encephalopathy	0	3	20	0	-0.4	0.984
Glycine metabolism	0	3	19	0	-0.4	0.99
Hypothetical craniofacial development pathway	0	3	11	0	-0.4	0.865
Kinin-Kallikrein pathway	0	3	10	0	-0.4	0.807
Oxytocin signaling	0	3	10	0	-0.4	0.796
SARS-CoV-2 altering angiogenesis via NRP1	0	3	11	0	-0.4	0.852
SARS-CoV-2 and angiotensin-converting enzyme 2 receptor: molecular mechanisms	0	3	14	0	-0.4	0.964
Serotonin receptor 2 and STAT3 signaling	0	3	6	0	-0.4	0.379
Somitogenesis in the context of spondylocostal dysostosis	0	3	10	0	-0.4	0.821
Vitamins A and D - action mechanisms	0	3	14	0	-0.4	0.968
Vitamin B6-dependent and responsive disorders	0	3	29	0	-0.4	0.803
Amyotrophic lateral sclerosis (ALS)	1	29	56	0.0345	-0.42	0.678
MAPK cascade	1	29	37	0.0345	-0.42	0.636
Neovascularisation processes	1	29	42	0.0345	-0.42	0.638
Kit receptor signaling pathway	2	52	60	0.0385	-0.43	0.671
Gastrin signaling pathway	4	96	115	0.0417	-0.44	0.674
Complement and coagulation cascades	1	30	63	0.0333	-0.45	0.638
Prostaglandin synthesis and regulation	1	30	61	0.0333	-0.45	0.621
Aflatoxin B1 metabolism	0	4	16	0	-0.47	0.95
GABA metabolism (aka GHB)	0	4	42	0	-0.47	0.583
Ketone bodies synthesis and degradation	0	4	13	0	-0.47	0.858
Linoleic acid metabolism affected by coronavirus infection	0	4	28	0	-0.47	0.753
Metabolism of alpha-linolenic acid	0	4	27	0	-0.47	0.79
miR-222 in exercise-induced cardiac growth	0	4	5	0	-0.47	0.132
Peroxiredoxin 2 induced ovarian failure	0	4	13	0	-0.47	0.824
Peroxisomal beta-oxidation of tetracosanoyl-CoA	0	4	17	0	-0.47	0.959
Robo4 and VEGF signaling pathways crosstalk	0	4	7	0	-0.47	0.298
Somatic sex determination	0	4	15	0	-0.47	0.927
Tgif disruption of Shh signaling	0	4	10	0	-0.47	0.624
Overview of leukocyte-intrinsic Hippo pathway functions	1	31	37	0.0323	-0.49	0.636
Photodynamic therapy-induced HIF-1 survival signaling	1	31	38	0.0323	-0.49	0.654
Synaptic vesicle pathway	1	31	59	0.0323	-0.49	0.59
Glycogen synthesis and degradation	1	32	54	0.0313	-0.52	0.598
Hedgehog signaling pathway	1	32	44	0.0313	-0.52	0.605
Arachidonate epoxygenase / epoxide hydrolase	0	5	18	0	-0.52	0.926
Benzo(a)pyrene metabolism	0	5	17	0	-0.52	0.9
Biogenic amine synthesis	0	5	33	0	-0.52	0.669
Cell-type dependent selectivity of CCK2R signaling	0	5	26	0	-0.52	0.762
Cholesterol biosynthesis with skeletal dysplasias	0	5	23	0	-0.52	0.861
Codeine and morphine metabolism	0	5	25	0	-0.52	0.795
Drug induction of bile acid pathway	0	5	45	0	-0.52	0.617
Effects of nitric oxide	0	5	16	0	-0.52	0.896
Fluoroacetic acid toxicity	0	5	16	0	-0.52	0.876
Folate-alcohol and cancer pathway hypotheses	0	5	24	0	-0.52	0.807
FTO obesity variant mechanism	0	5	11	0	-0.52	0.542
Glial cell differentiation	0	5	9	0	-0.52	0.351
GPCRs, class C metabotropic glutamate, pheromone	0	5	15	0	-0.52	0.854
mir-124 predicted interactions with cell cycle and differentiation	0	5	8	0	-0.52	0.268
PTF1A related regulatory pathway	0	5	12	0	-0.52	0.64
Steroid biosynthesis	0	5	25	0	-0.52	0.776
TCA cycle nutrient use and invasiveness of ovarian cancer	0	5	11	0	-0.52	0.541
Pancreatic adenocarcinoma pathway	3	78	97	0.0385	-0.52	0.561
Wnt signaling	3	78	121	0.0385	-0.52	0.644
Pathways affected in adenoid cystic carcinoma	2	56	72	0.0357	-0.54	0.619
AMP-activated protein kinase (AMPK) signaling	2	57	78	0.0351	-0.56	0.608
ncRNAs involved in Wnt signaling in hepatocellular carcinoma	2	57	96	0.0351	-0.56	0.581
Acetylcholine synthesis	0	6	18	0	-0.57	0.824
Alternative pathway of fetal androgen synthesis	0	6	48	0	-0.57	0.601
ATR signaling	0	6	10	0	-0.57	0.302
Bile acids synthesis and enterohepatic circulation	0	6	18	0	-0.57	0.83
Biomarkers for urea cycle disorders	0	6	51	0	-0.57	0.58
Degradation pathway of sphingolipids, including diseases	0	6	41	0	-0.57	0.633
exRNA mechanism of action and biogenesis	0	6	8	0	-0.57	0.23
Gene regulatory network modelling somitogenesis	0	6	13	0	-0.57	0.563
Heme biosynthesis	0	6	28	0	-0.57	0.727
Insulin signaling in adipocytes (diabetic condition)	0	6	12	0	-0.57	0.492
Insulin signaling in adipocytes (normal condition)	0	6	15	0	-0.57	0.712
Krebs cycle disorders	0	6	34	0	-0.57	0.66
Lipid particles composition	0	6	21	0	-0.57	0.876
Liver X receptor pathway	0	6	12	0	-0.57	0.47
Metastatic brain tumor	0	6	28	0	-0.57	0.731
MicroRNA for targeting cancer growth and vascularization in glioblastoma	0	6	10	0	-0.57	0.331
miRNA biogenesis	0	6	7	0	-0.57	0.179
Mitochondrial fatty acid synthesis pathway	0	6	21	0	-0.57	0.843
Molybdenum cofactor (Moco) biosynthesis	0	6	21	0	-0.57	0.854
Pilocytic astrocytoma	0	6	14	0	-0.57	0.62
SARS-CoV-2 B.1.1.7 variant antagonises innate immune activation	0	6	15	0	-0.57	0.706
Somatroph axis (GH) and its relationship to dietary restriction and aging	0	6	12	0	-0.57	0.457
Mechanoregulation and pathology of YAP/TAZ via Hippo and non-Hippo mechanisms	1	34	47	0.0294	-0.58	0.586
Proteasome degradation	2	59	67	0.0339	-0.61	0.503
Metapathway biotransformation Phase I and II	3	82	191	0.0366	-0.62	0.522
Netrin-UNC5B signaling pathway	1	35	53	0.0286	-0.62	0.521
Nucleotide-binding oligomerization domain (NOD) pathway	1	35	43	0.0286	-0.62	0.618
Target of rapamycin (TOR) signaling	1	35	40	0.0286	-0.62	0.621
15q11.2 copy number variation syndrome	0	7	13	0	-0.62	0.421
ACE inhibitor pathway	0	7	29	0	-0.62	0.663
Activation of NLRP3 inflammasome by SARS-CoV-2	0	7	10	0	-0.62	0.227
Altered glycosylation of MUC1 in tumor microenvironment	0	7	10	0	-0.62	0.265
Cellular proteostasis	0	7	15	0	-0.62	0.553
Cerebral organic acidurias, including diseases	0	7	46	0	-0.62	0.593
DDX1 as a regulatory component of the Drosha microprocessor	0	7	8	0	-0.62	0.186
EDA signaling in hair follicle development	0	7	15	0	-0.62	0.567
EV release from cardiac cells and their functional effects	0	7	17	0	-0.62	0.674
Interleukin-1 induced activation of NF-kB	0	7	13	0	-0.62	0.442
SARS-CoV-2 and COVID-19 pathway	0	7	70	0	-0.62	0.518
Type III interferon signaling	0	7	11	0	-0.62	0.296
Valproic acid pathway	0	7	36	0	-0.62	0.618
Androgen receptor signaling pathway	3	83	90	0.0361	-0.64	0.567
Oncostatin M signaling pathway	2	60	66	0.0333	-0.64	0.462
Proximal tubule transport	1	36	86	0.0278	-0.65	0.561
Alanine and aspartate metabolism	0	8	66	0	-0.66	0.441
ApoE and miR-146 in inflammation and atherosclerosis	0	8	13	0	-0.66	0.352
Canonical NF-kB pathway	0	8	9	0	-0.66	0.213
Classical pathway of steroidogenesis with glucocorticoid and mineralocorticoid metabolism	0	8	73	0	-0.66	0.499
Dual hijack model of Vif in HIV infection	0	8	10	0	-0.66	0.242
Ethanol metabolism production of ROS by CYP2E1	0	8	28	0	-0.66	0.68
Hijack of ubiquitination by SARS-CoV-2	0	8	12	0	-0.66	0.277
Ketogenesis and ketolysis	0	8	27	0	-0.66	0.694
Macrophage markers	0	8	10	0	-0.66	0.213
Mitochondrial complex II assembly	0	8	10	0	-0.66	0.221
NAD biosynthesis II (from tryptophan)	0	8	34	0	-0.66	0.646
Nanomaterial-induced inflammasome activation	0	8	13	0	-0.66	0.34
Nicotine effect on dopaminergic neurons	0	8	31	0	-0.66	0.663
NIPBL role in DNA damage - Cornelia de Lange syndrome	0	8	9	0	-0.66	0.221
Non-homologous end joining	0	8	11	0	-0.66	0.231
Omega-9 fatty acid synthesis	0	8	44	0	-0.66	0.605
Serotonin and anxiety-related events	0	8	16	0	-0.66	0.487
Supression of HMGB1 mediated inflammation by THBD	0	8	10	0	-0.66	0.251
Transcription factors regulate miRNAs related to cardiac hypertrophy	0	8	16	0	-0.66	0.496
Brain-derived neurotrophic factor (BDNF) signaling pathway	4	107	150	0.0374	-0.67	0.537
PI3K-Akt signaling pathway	9	217	359	0.0415	-0.68	0.509
Non-small cell lung cancer	2	62	88	0.0323	-0.69	0.533
MAPK signaling pathway	7	175	258	0.04	-0.7	0.465
Aerobic glycolysis	0	9	35	0	-0.7	0.605
Biotin metabolism, including IEMs	0	9	38	0	-0.7	0.635
Blood clotting cascade	0	9	27	0	-0.7	0.621
Cytokines and inflammatory response	0	9	32	0	-0.7	0.63
Estrogen receptor pathway	0	9	16	0	-0.7	0.406
Familial hyperlipidemia type 2	0	9	36	0	-0.7	0.635
Familial hyperlipidemia type 3	0	9	24	0	-0.7	0.603
Familial hyperlipidemia type 5	0	9	28	0	-0.7	0.621
GDNF/RET signaling axis	0	9	24	0	-0.7	0.563
Genes targeted by miRNAs in adipocytes	0	9	19	0	-0.7	0.485
Inclusion body myositis	0	9	27	0	-0.7	0.607
lncRNA-mediated mechanisms of therapeutic resistance	0	9	14	0	-0.7	0.345
Major receptors targeted by epinephrine and norepinephrine	0	9	34	0	-0.7	0.638
Mammary gland development pathway - Embryonic development (Stage 1 of 4)	0	9	21	0	-0.7	0.525
Methionine metabolism leading to sulfur amino acids and related disorders	0	9	46	0	-0.7	0.599
Nod-like receptor (NLR) signaling pathway	0	9	11	0	-0.7	0.261
SRF and miRs in smooth muscle differentiation and proliferation	0	9	18	0	-0.7	0.456
TCA cycle in senescence	0	9	30	0	-0.7	0.621
Vitamin B12 disorders	0	9	36	0	-0.7	0.606
IL-2 signaling pathway	1	38	43	0.0263	-0.7	0.608
Histone modifications	2	63	68	0.0317	-0.71	0.407
lncRNA in canonical Wnt signaling and colorectal cancer	2	63	102	0.0317	-0.71	0.517
Microtubule cytoskeleton regulation	1	39	47	0.0256	-0.73	0.553
Phosphoinositides metabolism	1	39	89	0.0256	-0.73	0.48
TNF-related weak inducer of apoptosis (TWEAK) signaling pathway	1	39	45	0.0256	-0.73	0.563
Autosomal recessive osteopetrosis pathways	0	10	14	0	-0.74	0.303
Cancer immunotherapy by CTLA4 blockade	0	10	21	0	-0.74	0.436
Dopaminergic neurogenesis	0	10	32	0	-0.74	0.616
Familial hyperlipidemia type 1	0	10	35	0	-0.74	0.615
MAPK and NFkB signaling pathways inhibited by Yersinia YopJ	0	10	13	0	-0.74	0.291
SMC1/SMC3 role in DNA damage - Cornelia de Lange Syndrome	0	10	12	0	-0.74	0.268
Trans-sulfuration pathway	0	10	25	0	-0.74	0.527
Aspirin and miRNAs	0	11	24	0	-0.77	0.399
Cell differentiation - index	0	11	61	0	-0.77	0.397
Deregulation of Rab and Rab effector genes in bladder cancer	0	11	17	0	-0.77	0.301
Development of pulmonary dendritic cells and macrophage subsets	0	11	14	0	-0.77	0.304
ERK pathway in Huntington's disease	0	11	17	0	-0.77	0.313
Fatty acid transporters	0	11	28	0	-0.77	0.512
GPR40 pathway	0	11	20	0	-0.77	0.292
Hedgehog signaling pathway Netpath	0	11	17	0	-0.77	0.29
Leptin-insulin signaling overlap	0	11	20	0	-0.77	0.312
Omega-3 / omega-6 fatty acid synthesis	0	11	53	0	-0.77	0.457
RalA downstream regulated genes	0	11	13	0	-0.77	0.246
Serotonin and anxiety	0	11	22	0	-0.77	0.376
Small ligand GPCRs	0	11	25	0	-0.77	0.462
Transcriptional cascade regulating adipogenesis	0	11	14	0	-0.77	0.288
TGF-beta signaling pathway	4	113	133	0.0354	-0.78	0.448
G protein signaling pathways	2	66	97	0.0303	-0.78	0.479
Thymic stromal lymphopoietin (TSLP) signaling pathway	1	41	49	0.0244	-0.79	0.508
Airway smooth muscle cell contraction	0	12	25	0	-0.81	0.38
Development and heterogeneity of the ILC family	0	12	33	0	-0.81	0.525
Familial hyperlipidemia type 4	0	12	36	0	-0.81	0.564
GABA receptor signaling	0	12	57	0	-0.81	0.415
Ganglio sphingolipid metabolism	0	12	56	0	-0.81	0.438
GPCRs, class B secretin-like	0	12	24	0	-0.81	0.33
Kennedy pathway from sphingolipids	0	12	35	0	-0.81	0.592
Mammary gland development pathway - Puberty (Stage 2 of 4)	0	12	15	0	-0.81	0.287
Mevalonate arm of cholesterol biosynthesis pathway	0	12	55	0	-0.81	0.44
Nanoparticle triggered regulated necrosis	0	12	26	0	-0.81	0.388
Energy metabolism	1	42	49	0.0238	-0.81	0.5
Exercise-induced circadian regulation	1	42	49	0.0238	-0.81	0.489
Corticotropin-releasing hormone signaling pathway	2	68	98	0.0294	-0.83	0.435
Hippo signaling regulation pathways	2	68	104	0.0294	-0.83	0.445
Focal adhesion: PI3K-Akt-mTOR-signaling pathway	8	206	305	0.0388	-0.83	0.453
Endoplasmic reticulum stress response in coronavirus infection	1	43	57	0.0233	-0.84	0.395
IL-3 signaling pathway	1	43	50	0.0233	-0.84	0.454
Amplification and expansion of oncogenic pathways as metastatic traits	0	13	18	0	-0.84	0.209
Cholesterol biosynthesis pathway	0	13	32	0	-0.84	0.48
Extracellular vesicles in the crosstalk of cardiac cells	0	13	30	0	-0.84	0.456
Galanin receptor pathway	0	13	22	0	-0.84	0.193
MAP3K1 role in promoting and blocking gonadal determination	0	13	18	0	-0.84	0.202
MAPK pathway in congenital thyroid cancer	0	13	19	0	-0.84	0.199
miR-509-3p alteration of YAP1/ECM axis	0	13	19	0	-0.84	0.194
MYD88 distinct input-output pathway	0	13	20	0	-0.84	0.194
Neuroinflammation	0	13	31	0	-0.84	0.468
Amino acid metabolism	2	69	205	0.029	-0.85	0.386
T-cell antigen receptor (TCR) pathway during Staphylococcus aureus infection	1	44	70	0.0227	-0.87	0.369
Cell differentiation - expanded index	0	14	69	0	-0.87	0.363
Constitutive androstane receptor pathway	0	14	34	0	-0.87	0.474
Mitochondrial gene expression	0	14	23	0	-0.87	0.183
Regulation of sister chromatid separation at the metaphase-anaphase transition	0	14	16	0	-0.87	0.228
Riboflavin and CoQ disorders	0	14	59	0	-0.87	0.42
Neuroinflammation and glutamatergic signaling	3	95	178	0.0316	-0.88	0.365
EGFR tyrosine kinase inhibitor resistance	2	71	92	0.0282	-0.89	0.343
Apoptosis modulation by HSP70	0	15	22	0	-0.9	0.159
Imatinib and chronic myeloid leukemia	0	15	25	0	-0.9	0.193
nsp1 from SARS-CoV-2 inhibits translation initiation in the host cell	0	15	21	0	-0.9	0.164
SARS coronavirus and innate immunity	0	15	33	0	-0.9	0.387
Transcription factor regulation in adipogenesis	0	15	24	0	-0.9	0.197
Type II diabetes mellitus	0	15	28	0	-0.9	0.228
Eicosanoid synthesis	0	16	57	0	-0.93	0.408
Hypertrophy model	0	16	21	0	-0.93	0.169
Interactome of polycomb repressive complex 2 (PRC2)	0	16	17	0	-0.93	0.217
Kynurenine pathway and links to cell senescence	0	16	56	0	-0.93	0.413
Overview of interferons-mediated signaling pathway	0	16	38	0	-0.93	0.407
PI3K/AKT/mTOR - VitD3 signaling	0	16	34	0	-0.93	0.31
Pregnane X receptor pathway	0	16	35	0	-0.93	0.374
Serotonin receptor 2 and ELK-SRF/GATA4 signaling	0	16	24	0	-0.93	0.154
TP53 network	0	16	23	0	-0.93	0.144
Modulators of TCR signaling and T cell activation	1	47	66	0.0213	-0.94	0.368
RANKL/RANK signaling pathway	1	47	58	0.0213	-0.94	0.399
Angiogenesis	0	17	25	0	-0.96	0.136
Proteoglycan biosynthesis	0	17	36	0	-0.96	0.368
RAS and bradykinin pathways in COVID-19	0	17	51	0	-0.96	0.435
Transcription co-factors SKI and SKIL protein partners	0	17	19	0	-0.96	0.118
Triacylglyceride synthesis	0	17	37	0	-0.96	0.355
IL-1 signaling pathway	1	48	57	0.0208	-0.96	0.399
Toll-like receptor signaling pathway	2	75	117	0.0267	-0.98	0.36
IL-4 signaling pathway	1	49	55	0.0204	-0.99	0.403
Fatty acid biosynthesis	0	18	43	0	-0.99	0.386
Inhibition of exosome biogenesis and secretion by Manumycin A in CRPC cells	0	18	19	0	-0.99	0.132
mBDNF and proBDNF regulation of GABA neurotransmission	0	18	40	0	-0.99	0.349
Selective expression of chemokine receptors during T-cell polarization	0	18	30	0	-0.99	0.198
Urea cycle and associated pathways	0	18	81	0	-0.99	0.284
Vitamin A and carotenoid metabolism	0	18	65	0	-0.99	0.383
22q11.2 copy number variation syndrome	3	102	225	0.0294	-1.02	0.319
15q13.3 copy number variation syndrome	0	19	40	0	-1.02	0.309
Angiotensin II receptor type 1 pathway	0	19	37	0	-1.02	0.288
Disruption of postsynaptic signaling by CNV	0	19	35	0	-1.02	0.25
Hematopoietic stem cell gene regulation by GABP alpha/beta complex	0	19	26	0	-1.02	0.148
Chemokine signaling pathway	4	127	172	0.0315	-1.03	0.313
Apoptosis modulation and signaling	2	78	97	0.0256	-1.04	0.279
Estrogen signaling pathway	0	20	26	0	-1.04	0.145
Hippo-Yap signaling pathway	0	20	24	0	-1.04	0.133
Host-pathogen interaction of human coronaviruses - apoptosis	0	20	34	0	-1.04	0.22
Host-pathogen interaction of human coronaviruses - autophagy	0	20	23	0	-1.04	0.147
Intracellular trafficking proteins involved in CMT neuropathy	0	20	28	0	-1.04	0.138
miRNA regulation of p53 pathway in prostate cancer	0	20	37	0	-1.04	0.226
Regulation of apoptosis by parathyroid hormone-related protein	0	20	24	0	-1.04	0.139
T cell receptor and co-stimulatory signaling	0	20	45	0	-1.04	0.303
Cannabinoid receptor signaling	0	21	54	0	-1.07	0.367
Genes controlling nephrogenesis	0	21	45	0	-1.07	0.273
Glycerolipids and glycerophospholipids	0	21	52	0	-1.07	0.371
Physiological and pathological hypertrophy of the heart	0	21	27	0	-1.07	0.167
S1P receptor signal transduction	0	21	26	0	-1.07	0.14
Sphingolipid metabolism overview	0	21	55	0	-1.07	0.339
Striated muscle contraction pathway	0	21	39	0	-1.07	0.188
Cytoplasmic ribosomal proteins	2	80	89	0.025	-1.08	0.272
Ras signaling	4	130	192	0.0308	-1.08	0.275
Immune response to tuberculosis	0	22	24	0	-1.09	0.13
Matrix metalloproteinases	0	22	31	0	-1.09	0.15
Sphingolipid metabolism: integrated pathway	0	22	97	0	-1.09	0.22
Cytosolic DNA-sensing pathway	1	54	77	0.0185	-1.1	0.281
Endometrial cancer	1	54	77	0.0185	-1.1	0.294
Epithelial to mesenchymal transition in colorectal cancer	3	107	163	0.028	-1.11	0.254
Myometrial relaxation and contraction pathways	3	107	161	0.028	-1.11	0.238
Canonical and non-canonical Notch signaling	0	23	31	0	-1.12	0.17
Common pathways underlying drug addiction	0	23	50	0	-1.12	0.282
EPO receptor signaling	0	23	27	0	-1.12	0.158
Follicle stimulating hormone (FSH) signaling pathway	0	23	28	0	-1.12	0.164
Prostaglandin and leukotriene metabolism in senescence	0	23	57	0	-1.12	0.337
Relationship between inflammation, COX-2 and EGFR	0	23	29	0	-1.12	0.158
Unfolded protein response	0	23	28	0	-1.12	0.168
Nonalcoholic fatty liver disease	4	133	170	0.0301	-1.13	0.243
Thermogenesis	2	83	140	0.0241	-1.14	0.267
IL-17 signaling pathway	0	24	33	0	-1.14	0.186
Intraflagellar transport proteins binding to dynein	0	24	28	0	-1.14	0.16
Lipid metabolism pathway	0	24	43	0	-1.14	0.151
Melatonin metabolism and effects	0	24	64	0	-1.14	0.319
Tryptophan metabolism	0	24	140	0	-1.14	0.271
White fat cell differentiation	0	24	35	0	-1.14	0.172
Insulin signaling	4	134	162	0.0299	-1.14	0.234
Angiopoietin-like protein 8 regulatory pathway	3	110	157	0.0273	-1.16	0.209
Autophagy	0	25	33	0	-1.17	0.15
Photodynamic therapy-induced unfolded protein response	0	25	28	0	-1.17	0.137
Regucalcin in proximal tubule epithelial kidney cells	0	25	68	0	-1.17	0.271
Type I interferon induction and signaling during SARS-CoV-2 infection	0	25	45	0	-1.17	0.158
Alzheimer's disease	7	207	288	0.0338	-1.17	0.246
Regulation of toll-like receptor signaling pathway	3	111	153	0.027	-1.18	0.238
Alzheimer's disease and miRNA effects	7	208	358	0.0337	-1.18	0.227
Nanoparticle-mediated activation of receptor signaling	0	26	36	0	-1.19	0.153
Signal transduction through IL1R	0	26	34	0	-1.19	0.162
Type II interferon signaling (IFNG)	0	26	38	0	-1.19	0.13
RAC1/PAK1/p38/MMP2 pathway	1	59	74	0.0169	-1.21	0.277
Kisspeptin/kisspeptin receptor system in the ovary	0	27	49	0	-1.21	0.144
Neural crest cell migration during development	0	27	40	0	-1.21	0.119
Sphingolipid pathway	0	27	63	0	-1.21	0.26
Toll-like receptor signaling related to MyD88	0	27	32	0	-1.21	0.154
Ebola virus pathway in host	3	114	141	0.0263	-1.23	0.228
Alpha 6 beta 4 signaling pathway	0	28	34	0	-1.24	0.141
NO/cGMP/PKG mediated neuroprotection	0	28	65	0	-1.24	0.235
Tumor suppressor activity of SMARCB1	0	28	35	0	-1.24	0.128
T-cell activation SARS-CoV-2	1	61	98	0.0164	-1.25	0.216
Genes related to primary cilium development (based on CRISPR)	2	89	104	0.0225	-1.25	0.193
Hepatocyte growth factor receptor signaling	0	29	35	0	-1.26	0.128
Initiation of transcription and translation elongation at the HIV-1 LTR	0	29	35	0	-1.26	0.13
p38 MAPK signaling pathway	0	29	36	0	-1.26	0.127
PI3K-AKT-mTOR signaling pathway and therapeutic opportunities	0	29	33	0	-1.26	0.121
EGF/EGFR signaling pathway	4	142	163	0.0282	-1.27	0.181
Factors and pathways affecting insulin-like growth factor (IGF1)-Akt signaling	0	30	43	0	-1.28	0.103
G13 signaling pathway	0	30	39	0	-1.28	0.121
Host-pathogen interaction of human coronaviruses - interferon induction	0	30	47	0	-1.28	0.114
Neural crest cell migration in cancer	0	30	43	0	-1.28	0.091
Type 2 papillary renal cell carcinoma	0	30	41	0	-1.28	0.097
Fragile X syndrome	2	91	133	0.022	-1.28	0.185
Chromosomal and microsatellite instability in colorectal cancer	1	63	81	0.0159	-1.29	0.235
Joubert syndrome	1	63	87	0.0159	-1.29	0.236
Mitochondrial complex IV assembly	0	32	40	0	-1.32	0.103
T-cell receptor (TCR) signaling pathway	1	65	93	0.0154	-1.32	0.202
FBXL10 enhancement of MAP/ERK signaling in diffuse large B-cell lymphoma	0	33	36	0	-1.34	0.091
Glycolysis and gluconeogenesis	0	33	69	0	-1.34	0.165
Host-pathogen interaction of human coronaviruses - MAPK signaling	0	33	43	0	-1.34	0.098
Clear cell renal cell carcinoma pathways	1	66	92	0.0152	-1.34	0.188
Leptin signaling pathway	1	68	77	0.0147	-1.38	0.194
Eukaryotic transcription initiation	0	35	42	0	-1.38	0.078
IL-5 signaling pathway	0	35	41	0	-1.38	0.103
PDGF pathway	0	35	53	0	-1.38	0.104
Notch signaling	0	36	48	0	-1.4	0.109
Rett syndrome causing genes	0	36	60	0	-1.4	0.116
Acute viral myocarditis	1	70	110	0.0143	-1.42	0.166
Envelope proteins and their potential roles in EDMD physiopathology	0	37	47	0	-1.42	0.106
Interleukin-11 signaling pathway	0	39	45	0	-1.46	0.102
MicroRNAs in cardiomyocyte hypertrophy	1	73	109	0.0137	-1.47	0.141
Neurodegeneration with brain iron accumulation (NBIA) subtypes pathway	0	41	77	0	-1.5	0.09
Translation inhibitors in chronically activated PDGFRA cells	0	42	49	0	-1.51	0.076
Cardiac hypertrophic response	0	44	61	0	-1.55	0.083
Synaptic signaling pathways associated with autism spectrum disorder	0	44	55	0	-1.55	0.078
Copper homeostasis	0	45	58	0	-1.57	0.059
Wnt signaling pathway	0	45	52	0	-1.57	0.079
Ciliopathies	3	137	184	0.0219	-1.58	0.116
Notch signaling pathway (Netpath)	0	49	62	0	-1.64	0.072
Translation factors	0	49	51	0	-1.64	0.082
Interferon type I signaling pathways	0	50	57	0	-1.65	0.064
Genotoxicity pathway	0	52	65	0	-1.69	0.071
Hepatitis B infection	2	117	155	0.0171	-1.7	0.086
Mitochondrial complex I assembly model OXPHOS system	0	53	61	0	-1.7	0.06
Focal adhesion	3	152	201	0.0197	-1.79	0.07
Oxidative phosphorylation	0	61	68	0	-1.83	0.054
3q29 copy number variation syndrome	0	63	115	0	-1.86	0.045
Sterol regulatory element-binding proteins (SREBP) signaling	0	63	77	0	-1.86	0.038
Endoderm differentiation	1	101	147	0.0099	-1.9	0.061
Prolactin signaling pathway	0	67	79	0	-1.92	0.056
ErbB signaling pathway	0	75	101	0	-2.03	0.048
B cell receptor signaling pathway	0	79	99	0	-2.08	0.035
mRNA processing	1	117	130	0.0085	-2.12	0.035
DNA damage response (only ATM dependent)	0	91	118	0	-2.24	0.022
Electron transport chain: OXPHOS system in mitochondria	0	98	119	0	-2.32	0.021
Acrylamide biotransformation and exposure biomarkers	0	0	10	NaN%	NaN	0
Amino acid conjugation of benzoic acid	0	0	15	NaN%	NaN	0
Amino acid conjugation	0	0	7	NaN%	NaN	0
Biochemical pathways: part I	0	0	471	NaN%	NaN	0
Blood clotting and drug effects	0	0	13	NaN%	NaN	0
Colchicine metabolic pathway	0	0	5	NaN%	NaN	0
Felbamate metabolism	0	0	12	NaN%	NaN	0
Lidocaine metabolism	0	0	11	NaN%	NaN	0
Liver steatosis adverse outcome pathway	0	0	46	NaN%	NaN	0
Metabolism of dichloroethylene by CYP450	0	0	13	NaN%	NaN	0
Metabolism of tetrahydrocannabinol (THC)	0	0	11	NaN%	NaN	0
Metabolism overview	0	0	116	NaN%	NaN	0
Meta pathway lipodystrophy, dyslipidemia and hyperlipidemia	0	0	13	NaN%	NaN	0
Mitochondrial complex I inhibition leading to chemical-induced Fanconi syndrome	0	0	21	NaN%	NaN	0
Modified nucleosides derived from tRNA as urinary cancer markers	0	0	21	NaN%	NaN	0
Ophthalmate biosynthesis in hepatocytes	0	0	10	NaN%	NaN	0
Phosphatidylcholine catabolism	0	0	32	NaN%	NaN	0
Role of carnosine in muscle contraction	0	0	14	NaN%	NaN	0

## Sheet: THP1_Perfectha_Dp_adjPvalue005
Statistics results for Fri Dec 10 21:01:15 CET 2021
Dataset: J:\FHML_TGX\Danyel.Jennen\ProjectFolder\Projects\Filler-project\THP1_Perfectha\pathvisio\noflags\THP1_Perfectha_limma_OUTPUT_TABLE.pgex
Pathway directory: D:\wikipathways-20211110-gpml-Homo_sapiens
Gene database: D:\pathvisio-3.3.0\Hs_Derby_Ensembl_91.bridge
Criterion: [Dp_adj.P.Val] < 0.05
Calculation method: pathway-centric. Calculations are performed after mapping data to pathways.
Total data points (N): 8363
Data points meeting criterion (R): 222
Pathway	positive (r)	measured (n)	total	%	Z Score	p-value (permuted)
Pentose phosphate metabolism	3	5	21	0.6	7.98	0
ID signaling pathway	4	12	17	0.3333	6.62	0
Ultraconserved region 339 modulation of tumor suppressor microRNAs in cancer	1	1	6	1	6.06	0
Antiviral and anti-inflammatory effects of Nrf2 on SARS-CoV-2 pathway	5	23	50	0.2174	5.7	0
Oxidative stress response	5	25	35	0.2	5.4	0
miR-517 relationship with ARCN1 and USP1	2	5	7	0.4	5.2	0.005
Pluripotent stem cell differentiation pathway	4	21	64	0.1905	4.68	0
Cell differentiation - expanded index	3	14	69	0.2143	4.37	0.001
COVID-19 adverse outcome pathway	2	7	24	0.2857	4.27	0.001
Tyrosine metabolism	1	2	27	0.5	4.17	0.002
miRNAs involved in DNA damage response	4	25	70	0.16	4.16	0.001
Burn wound healing	7	72	124	0.0972	3.75	0
G1 to S cell cycle control	6	58	68	0.1034	3.66	0.002
Hepatitis C and hepatocellular carcinoma	5	45	63	0.1111	3.54	0.003
Retinoblastoma gene in cancer	7	79	98	0.0886	3.45	0.007
Cell differentiation - index	2	11	61	0.1818	3.21	0.003
DNA replication	4	37	50	0.1081	3.09	0.014
Zinc homeostasis	3	24	39	0.125	3	0.015
Phosphodiesterases in neuronal function	3	25	66	0.12	2.91	0.009
Ferroptosis	4	40	88	0.1	2.9	0.014
Mitochondrial long chain fatty acid beta-oxidation	2	13	24	0.1538	2.86	0.021
Photodynamic therapy-induced NF-kB survival signaling	3	26	36	0.1154	2.82	0.019
Benzene metabolism	1	4	17	0.25	2.78	0.019
Ketone bodies synthesis and degradation	1	4	13	0.25	2.78	0.011
Transcriptional activation by NRF2 in response to phytochemicals	2	14	20	0.1429	2.71	0.028
Glutathione metabolism	2	15	57	0.1333	2.58	0.029
Interactions between LOXL4 and oxidative stress pathway	2	15	19	0.1333	2.58	0.029
miRNA regulation of DNA damage response	5	66	106	0.0758	2.5	0.018
Nuclear receptors meta-pathway	11	204	339	0.0539	2.46	0.014
Fluoroacetic acid toxicity	1	5	16	0.2	2.41	0.03
GPCRs, class C metabotropic glutamate, pheromone	1	5	15	0.2	2.41	0.021
Hfe effect on hepcidin production	1	5	8	0.2	2.41	0.06
Methylation pathways	1	5	15	0.2	2.41	0.037
Osteoblast signaling	1	5	18	0.2	2.41	0.023
Serine metabolism	1	5	43	0.2	2.41	0.024
Parkinson's disease pathway	3	32	84	0.0938	2.37	0.021
NRF2 pathway	6	92	145	0.0652	2.32	0.018
TYROBP causal network in microglia	4	52	61	0.0769	2.27	0.041
Metabolic reprogramming in colon cancer	3	34	80	0.0882	2.24	0.024
p53 transcriptional gene network	4	53	78	0.0755	2.22	0.022
Neural crest differentiation	4	54	102	0.0741	2.18	0.034
Spinal cord injury	5	75	127	0.0667	2.17	0.027
Overview of proinflammatory and profibrotic mediators	4	55	134	0.0727	2.14	0.024
Estrogen metabolism	1	6	45	0.1667	2.14	0.03
HIF1A and PPARG regulation of glycolysis	1	6	19	0.1667	2.14	0.026
Serotonin transporter activity	1	6	15	0.1667	2.14	0.033
ATM signaling pathway	3	37	50	0.0811	2.07	0.037
Nanoparticle triggered autophagic cell death	2	20	30	0.1	2.05	0.046
IL-6 signaling pathway	3	38	45	0.0789	2.01	0.043
Cytoplasmic ribosomal proteins	5	80	89	0.0625	2.01	0.035
Regulatory circuits of the STAT3 signaling pathway	4	59	79	0.0678	1.98	0.052
Cell cycle	6	105	124	0.0571	1.96	0.045
Hippo-Merlin signaling dysregulation	5	82	121	0.061	1.95	0.042
Oncostatin M signaling pathway	4	60	66	0.0667	1.94	0.042
Dopamine metabolism	1	7	48	0.1429	1.92	0.047
LDLRAD4 and what we know about it	1	7	12	0.1429	1.92	0.085
Vitamin D metabolism	1	7	22	0.1429	1.92	0.038
IL-18 signaling pathway	10	212	288	0.0472	1.89	0.058
NRF2-ARE regulation	2	22	24	0.0909	1.88	0.053
Photodynamic therapy-induced NFE2L2 (NRF2) survival signaling	2	22	24	0.0909	1.88	0.038
Prostaglandin signaling	2	22	40	0.0909	1.88	0.058
Selenium micronutrient network	4	62	198	0.0645	1.87	0.052
Folate metabolism	3	42	142	0.0714	1.81	0.052
One-carbon metabolism	2	23	58	0.087	1.8	0.047
Ketogenesis and ketolysis	1	8	27	0.125	1.73	0.054
Leptin and adiponectin	1	8	14	0.125	1.73	0.089
Mammary gland development pathway - Involution (Stage 4 of 4)	1	8	13	0.125	1.73	0.104
MFAP5-mediated ovarian cancer cell motility and invasiveness	1	8	18	0.125	1.73	0.068
Serotonin and anxiety-related events	1	8	16	0.125	1.73	0.078
Sulfation biotransformation reaction	1	8	29	0.125	1.73	0.042
Senescence and autophagy in cancer	5	91	112	0.0549	1.69	0.05
Fatty acid beta-oxidation	2	25	71	0.08	1.67	0.047
Hair follicle development: cytodifferentiation - part 3 of 3	3	46	93	0.0652	1.64	0.079
NOTCH1 regulation of endothelial cell calcification	1	9	18	0.1111	1.58	0.079
Pathogenesis of SARS-CoV-2 mediated by nsp9-nsp10 complex	1	9	34	0.1111	1.58	0.077
Thiamine metabolic pathways	1	9	34	0.1111	1.58	0.07
Network map of SARS-CoV-2 signaling pathway	7	150	324	0.0467	1.55	0.123
Vitamin D-sensitive calcium signaling in depression	2	27	55	0.0741	1.54	0.077
Orexin receptor pathway	5	98	225	0.051	1.52	0.136
Glucocorticoid receptor pathway	3	49	73	0.0612	1.51	0.07
Glycerophospholipid biosynthetic pathway	2	28	107	0.0714	1.48	0.065
Oxysterols derived from cholesterol	2	28	112	0.0714	1.48	0.093
Toll-like receptor signaling pathway	4	75	117	0.0533	1.45	0.074
Cells and molecules involved in local acute inflammatory response	1	10	19	0.1	1.45	0.109
Cori cycle	1	10	53	0.1	1.45	0.119
Disorders of folate metabolism and transport	1	10	46	0.1	1.45	0.108
FOXP3 in COVID-19	1	10	19	0.1	1.45	0.126
Glycolysis in senescence	1	10	26	0.1	1.45	0.06
Iron metabolism in placenta	1	10	15	0.1	1.45	0.16
Apoptosis-related network due to altered Notch3 in ovarian cancer	3	51	54	0.0588	1.44	0.121
Aryl hydrocarbon receptor pathway	2	29	49	0.069	1.42	0.121
Kit receptor signaling pathway	3	52	60	0.0577	1.4	0.081
SARS-CoV-2 innate immunity evasion and cell-specific immune response	3	52	92	0.0577	1.4	0.093
Vitamin B12 metabolism	2	30	118	0.0667	1.37	0.097
Deregulation of Rab and Rab effector genes in bladder cancer	1	11	17	0.0909	1.33	0.145
Development of pulmonary dendritic cells and macrophage subsets	1	11	14	0.0909	1.33	0.133
FGF23 signaling in hypophosphatemic rickets and related disorders	1	11	28	0.0909	1.33	0.076
Leptin-insulin signaling overlap	1	11	20	0.0909	1.33	0.137
ncRNAs involved in STAT3 signaling in hepatocellular carcinoma	1	11	19	0.0909	1.33	0.148
Osteoclast signaling	1	11	21	0.0909	1.33	0.132
Serotonin and anxiety	1	11	22	0.0909	1.33	0.118
Vitamin D receptor pathway	5	110	188	0.0455	1.24	0.194
Thyroid stimulating hormone (TSH) signaling pathway	3	57	67	0.0526	1.23	0.13
Canonical and non-canonical TGF-B signaling	1	12	18	0.0833	1.22	0.178
Development and heterogeneity of the ILC family	1	12	33	0.0833	1.22	0.072
FOXA2 pathway	1	12	23	0.0833	1.22	0.16
Glycosaminoglycan degradation	1	12	45	0.0833	1.22	0.11
Metabolic pathway of LDL, HDL and TG, including diseases	1	12	34	0.0833	1.22	0.081
OSX and miRNAs in tooth development	1	12	39	0.0833	1.22	0.09
Pyrimidine metabolism and related diseases	1	12	97	0.0833	1.22	0.134
DNA damage response	3	59	78	0.0508	1.17	0.101
Primary focal segmental glomerulosclerosis (FSGS)	3	59	77	0.0508	1.17	0.122
Parkin-ubiquitin proteasomal system pathway	3	60	75	0.05	1.13	0.141
Biomarkers for pyrimidine metabolism disorders	1	13	88	0.0769	1.13	0.17
Galanin receptor pathway	1	13	22	0.0769	1.13	0.184
MAPK pathway in congenital thyroid cancer	1	13	19	0.0769	1.13	0.204
MYD88 distinct input-output pathway	1	13	20	0.0769	1.13	0.194
Neuroinflammation	1	13	31	0.0769	1.13	0.104
Osteopontin signaling	1	13	14	0.0769	1.13	0.154
Lung fibrosis	2	35	85	0.0571	1.13	0.134
Kallmann syndrome	1	14	40	0.0714	1.05	0.112
Cholesterol metabolism with Bloch and Kandutsch-Russell pathways	2	37	97	0.0541	1.04	0.352
Malignant pleural mesothelioma	11	308	468	0.0357	1.02	0.292
IL-2 signaling pathway	2	38	43	0.0526	1	0.099
MFAP5 effect on permeability and motility of endothelial cells via cytoskeleton rearrangement	1	15	20	0.0667	0.97	0.223
Mitochondrial complex III assembly	1	15	19	0.0667	0.97	0.224
nsp1 from SARS-CoV-2 inhibits translation initiation in the host cell	1	15	21	0.0667	0.97	0.216
SREBF and miR33 in cholesterol and lipid homeostasis	1	15	19	0.0667	0.97	0.206
TGF-beta signaling in thyroid cells for epithelial-mesenchymal transition	1	15	20	0.0667	0.97	0.223
One-carbon metabolism and related pathways	2	39	94	0.0513	0.96	0.47
Neuroinflammation and glutamatergic signaling	4	95	178	0.0421	0.95	0.275
TGF-beta receptor signaling	2	40	56	0.05	0.92	0.204
Sudden infant death syndrome (SIDS) susceptibility pathways	4	97	182	0.0412	0.91	0.353
Nanomaterial induced apoptosis	1	16	31	0.0625	0.9	0.216
Overview of nanoparticle effects	1	16	42	0.0625	0.9	0.139
PPAR-alpha pathway	1	16	28	0.0625	0.9	0.25
Apoptosis	3	69	88	0.0435	0.88	0.524
Glioblastoma signaling pathways	3	70	88	0.0429	0.85	0.494
Interleukin-1 (IL-1) structural pathway	2	42	52	0.0476	0.85	0.258
PPAR signaling pathway	2	42	76	0.0476	0.85	0.614
IL1 and megakaryocytes in obesity	1	17	26	0.0588	0.83	0.249
Oligodendrocyte specification and differentiation, leading to myelin components for CNS	1	17	46	0.0588	0.83	0.192
Endochondral ossification with skeletal dysplasias	2	43	69	0.0465	0.82	0.609
Endochondral ossification	2	43	69	0.0465	0.82	0.609
IL-3 signaling pathway	2	43	50	0.0465	0.82	0.34
TGF-beta receptor signaling in skeletal dysplasias	2	43	60	0.0465	0.82	0.546
VEGFA-VEGFR2 signaling pathway	12	362	436	0.0331	0.8	0.397
Nonalcoholic fatty liver disease	5	133	170	0.0376	0.8	0.417
T-cell antigen receptor (TCR) pathway during Staphylococcus aureus infection	2	44	70	0.0455	0.78	0.642
Nuclear receptors in lipid metabolism and toxicity	1	18	48	0.0556	0.77	0.449
Circadian rhythm genes	5	135	209	0.037	0.76	0.474
Copper homeostasis	2	45	58	0.0444	0.75	0.635
Congenital generalized lipodystrophy (CGL)	1	19	31	0.0526	0.71	0.332
NAD metabolism in oncogene-induced senescence and mitochondrial dysfunction-associated senescence	1	19	46	0.0526	0.71	0.635
Nucleotide metabolism	1	19	37	0.0526	0.71	0.486
Statin inhibition of cholesterol production	1	19	50	0.0526	0.71	0.63
RANKL/RANK signaling pathway	2	47	58	0.0426	0.68	0.647
Focal adhesion: PI3K-Akt-mTOR-signaling pathway	7	206	305	0.034	0.67	0.477
Apoptosis modulation and signaling	3	78	97	0.0385	0.66	0.551
7-oxo-C and 7-beta-HC pathways	1	20	60	0.05	0.65	0.629
Estrogen signaling pathway	1	20	26	0.05	0.65	0.371
Hair follicle development: organogenesis - part 2 of 3	1	20	36	0.05	0.65	0.739
MTHFR deficiency	1	20	60	0.05	0.65	0.643
Vitamin D in inflammatory diseases	1	20	25	0.05	0.65	0.317
Regulation of toll-like receptor signaling pathway	4	111	153	0.036	0.63	0.609
Allograft Rejection	2	49	113	0.0408	0.62	0.427
IL-4 signaling pathway	2	49	55	0.0408	0.62	0.668
TNF-alpha signaling pathway	3	80	97	0.0375	0.61	0.601
Ebstein-Barr virus LMP1 signaling	1	21	25	0.0476	0.6	0.446
Monoamine transport	1	21	47	0.0476	0.6	0.753
Physiological and pathological hypertrophy of the heart	1	21	27	0.0476	0.6	0.564
Striated muscle contraction pathway	1	21	39	0.0476	0.6	0.879
Metapathway biotransformation Phase I and II	3	82	191	0.0366	0.57	0.546
Ethanol effects on histone modifications	1	22	53	0.0455	0.55	0.699
Matrix metalloproteinases	1	22	31	0.0455	0.55	0.896
PI3K-Akt signaling pathway	7	217	359	0.0323	0.53	0.608
16p11.2 distal deletion syndrome	1	23	46	0.0435	0.51	0.859
Cardiac progenitor differentiation	1	23	56	0.0435	0.51	0.679
Oxidation by cytochrome P450	1	23	75	0.0435	0.51	0.618
Endometrial cancer	2	54	77	0.037	0.48	0.672
Male infertility	3	87	150	0.0345	0.46	0.733
Effect of progerin on genes involved in Hutchinson-Gilford progeria syndrome	1	24	30	0.0417	0.46	0.993
Gastric cancer network 2	1	24	33	0.0417	0.46	0.995
Melatonin metabolism and effects	1	24	64	0.0417	0.46	0.636
TLR4 signaling and tolerance	1	24	30	0.0417	0.46	0.995
Tryptophan metabolism	1	24	140	0.0417	0.46	0.705
Melanoma	2	56	78	0.0357	0.43	0.623
Nucleotide excision repair in xeroderma pigmentosum	2	56	62	0.0357	0.43	0.672
Interactions of natural killer cells in pancreatic cancer	1	25	43	0.04	0.42	0.952
Trans-sulfuration and one-carbon metabolism	1	25	66	0.04	0.42	0.663
Type I interferon induction and signaling during SARS-CoV-2 infection	1	25	45	0.04	0.42	0.944
AMP-activated protein kinase (AMPK) signaling	2	57	78	0.0351	0.4	0.588
Non-genomic actions of 1,25 dihydroxyvitamin D3	2	57	97	0.0351	0.4	0.647
Adipogenesis	3	91	132	0.033	0.38	0.771
Fragile X syndrome	3	91	133	0.033	0.38	0.776
Prion disease pathway	1	26	36	0.0385	0.38	0.999
Resistin as a regulator of inflammation	1	26	34	0.0385	0.38	0.999
Type II interferon signaling (IFNG)	1	26	38	0.0385	0.38	0.998
Fluoropyrimidine activity	1	27	58	0.037	0.34	0.787
Interactions between immune cells and microRNAs in tumor microenvironment	1	27	52	0.037	0.34	0.863
Neural crest cell migration during development	1	27	40	0.037	0.34	0.993
Toll-like receptor signaling related to MyD88	1	27	32	0.037	0.34	0.999
Tumor suppressor activity of SMARCB1	1	28	35	0.0357	0.3	0.999
Gastrin signaling pathway	3	96	115	0.0313	0.29	0.924
Amyotrophic lateral sclerosis (ALS)	1	29	56	0.0345	0.27	0.884
Hepatocyte growth factor receptor signaling	1	29	35	0.0345	0.27	0.999
MAPK cascade	1	29	37	0.0345	0.27	0.999
Neovascularisation processes	1	29	42	0.0345	0.27	0.999
3q29 copy number variation syndrome	2	63	115	0.0317	0.26	0.924
Insulin signaling	4	134	162	0.0299	0.24	0.731
Host-pathogen interaction of human coronaviruses - interferon induction	1	30	47	0.0333	0.23	0.993
Neural crest cell migration in cancer	1	30	43	0.0333	0.23	0.999
Prostaglandin synthesis and regulation	1	30	61	0.0333	0.23	0.824
Ectoderm differentiation	3	100	145	0.03	0.22	0.79
Head and neck squamous cell carcinoma	2	65	81	0.0308	0.21	0.654
T-cell receptor (TCR) signaling pathway	2	65	93	0.0308	0.21	0.748
Fibrin complement receptor 3 signaling pathway	1	31	47	0.0323	0.2	0.993
Overview of leukocyte-intrinsic Hippo pathway functions	1	31	37	0.0323	0.2	0.999
Photodynamic therapy-induced HIF-1 survival signaling	1	31	38	0.0323	0.2	0.999
Splicing factor NOVA regulated synaptic proteins	1	31	44	0.0323	0.2	0.999
22q11.2 copy number variation syndrome	3	102	225	0.0294	0.18	0.815
Prolactin signaling pathway	2	67	79	0.0299	0.17	0.657
MAPK signaling pathway	5	175	258	0.0286	0.17	0.848
miRNAs involvement in the immune response in sepsis	1	32	69	0.0313	0.17	0.745
Corticotropin-releasing hormone signaling pathway	2	68	98	0.0294	0.15	0.905
Leptin signaling pathway	2	68	77	0.0294	0.15	0.69
Thyroid hormones production and peripheral downstream signaling effects	2	68	134	0.0294	0.15	0.939
FBXL10 enhancement of MAP/ERK signaling in diffuse large B-cell lymphoma	1	33	36	0.0303	0.13	0.999
Host-pathogen interaction of human coronaviruses - MAPK signaling	1	33	43	0.0303	0.13	0.999
DNA IR-damage and cellular response via ATR	2	69	90	0.029	0.13	0.811
Embryonic stem cell pluripotency pathways	2	69	123	0.029	0.13	0.994
Mechanoregulation and pathology of YAP/TAZ via Hippo and non-Hippo mechanisms	1	34	47	0.0294	0.1	0.999
Nephrotic syndrome	1	34	49	0.0294	0.1	0.998
EGFR tyrosine kinase inhibitor resistance	2	71	92	0.0282	0.09	0.919
IL-5 signaling pathway	1	35	41	0.0286	0.07	0.999
Netrin-UNC5B signaling pathway	1	35	53	0.0286	0.07	0.995
Nucleotide-binding oligomerization domain (NOD) pathway	1	35	43	0.0286	0.07	0.999
PDGF pathway	1	35	53	0.0286	0.07	0.998
Bladder cancer	1	36	47	0.0278	0.05	0.999
CCL18 signaling pathway	1	36	177	0.0278	0.05	0.971
Notch signaling	1	36	48	0.0278	0.05	0.999
Proximal tubule transport	1	36	86	0.0278	0.05	0.911
Complement system in neuronal development and plasticity	2	73	137	0.0274	0.05	0.967
Fas ligand pathway and stress induction of heat shock proteins	1	37	48	0.027	0.02	0.999
Prader-Willi and Angelman syndrome	1	38	90	0.0263	-0.01	0.975
Ebola virus pathway in host	3	114	141	0.0263	-0.02	0.99
Small cell lung cancer	2	77	104	0.026	-0.03	0.999
Integrated cancer pathway	1	39	50	0.0256	-0.04	0.999
Interleukin-11 signaling pathway	1	39	45	0.0256	-0.04	0.999
TNF-related weak inducer of apoptosis (TWEAK) signaling pathway	1	39	45	0.0256	-0.04	0.999
Nucleotide excision repair	1	40	44	0.025	-0.06	0.999
Thymic stromal lymphopoietin (TSLP) signaling pathway	1	41	49	0.0244	-0.09	0.999
Aryl hydrocarbon receptor Netpath	1	42	57	0.0238	-0.11	0.982
Exercise-induced circadian regulation	1	42	49	0.0238	-0.11	0.998
Integrin-mediated cell adhesion	2	82	102	0.0244	-0.12	0.951
ATM signaling in development and disease	1	43	49	0.0233	-0.13	0.999
Endoplasmic reticulum stress response in coronavirus infection	1	43	57	0.0233	-0.13	0.989
Pathogenic Escherichia coli infection	1	43	79	0.0233	-0.13	0.749
Thermogenesis	2	83	140	0.0241	-0.14	0.897
Arrhythmogenic right ventricular cardiomyopathy	1	44	81	0.0227	-0.16	0.68
Aripiprazole metabolic pathway	0	1	7	0	-0.17	0.903
Caffeine and theobromine metabolism	0	1	18	0	-0.17	0.999
Catalytic cycle of mammalian flavin-containing monooxygenases (FMOs)	0	1	14	0	-0.17	0.999
COVID-19, thrombosis and anticoagulation	0	1	27	0	-0.17	0.999
Diclofenac metabolic pathway	0	1	12	0	-0.17	0.995
Downregulation of ACE2 expression by SARS-CoV infection and SARS-CoV spike protein	0	1	8	0	-0.17	0.947
Evolocumab mechanism to reduce LDL cholesterol	0	1	5	0	-0.17	0.773
FABP4 in ovarian cancer	0	1	3	0	-0.17	0.489
Glucose homeostasis	0	1	24	0	-0.17	0.999
Hormonal control of pubertal growth spurt	0	1	8	0	-0.17	0.968
Influenza A virus infection	0	1	16	0	-0.17	0.998
Model for regulation of MSMP expression in cancer cells and its proangiogenic role in ovarian tumors	0	1	6	0	-0.17	0.856
Neurotransmitter disorders	0	1	27	0	-0.17	0.999
Nicotine metabolism in liver cells	0	1	18	0	-0.17	0.999
PCSK9-mediated LDL receptor degradation	0	1	3	0	-0.17	0.454
Soluble ACE2-mediated cell entry of SARS-CoV-2	0	1	7	0	-0.17	0.919
7q11.23 copy number variation syndrome	2	87	149	0.023	-0.21	0.773
Modulators of TCR signaling and T cell activation	1	47	66	0.0213	-0.23	0.787
Physico-chemical features and toxicity-associated pathways	1	47	78	0.0213	-0.23	0.661
Amino acid metabolism pathway excerpt: histidine catabolism extension	0	2	23	0	-0.23	0.999
Biosynthesis and regeneration of tetrahydrobiopterin and catabolism of phenylalanine	0	2	38	0	-0.23	0.999
Butyrate-induced histone acetylation	0	2	11	0	-0.23	0.955
Fatty acid omega-oxidation	0	2	20	0	-0.23	0.997
Gastric acid production	0	2	22	0	-0.23	0.999
Heroin metabolism	0	2	8	0	-0.23	0.835
HIPK2 in kidney fibrosis	0	2	8	0	-0.23	0.825
Hypoxia-mediated EMT and stemness	0	2	6	0	-0.23	0.657
MED and pseudoachondroplasia genes	0	2	7	0	-0.23	0.774
Mevalonate arm of cholesterol biosynthesis pathway with inhibitors	0	2	64	0	-0.23	0.756
MicroRNA network associated with chronic lymphocytic leukemia	0	2	10	0	-0.23	0.935
Nicotine effect on chromaffin cells	0	2	10	0	-0.23	0.932
Polyol pathway	0	2	17	0	-0.23	0.996
Secretion of hydrochloric acid in parietal cells	0	2	15	0	-0.23	0.993
Tamoxifen metabolism	0	2	37	0	-0.23	0.999
Thyroxine (thyroid hormone) production	0	2	12	0	-0.23	0.972
IL-1 signaling pathway	1	48	57	0.0208	-0.25	0.892
GPCRs, other	1	49	114	0.0204	-0.27	0.91
Notch signaling pathway (Netpath)	1	49	62	0.0204	-0.27	0.779
Translation factors	1	49	51	0.0204	-0.27	0.965
Arylamine metabolism	0	3	13	0	-0.29	0.938
Control of immune tolerance by vasoactive intestinal peptide	0	3	16	0	-0.29	0.974
Conversion of angiotensinogen to angiotensin II	0	3	9	0	-0.29	0.744
Direct reversal repair	0	3	4	0	-0.29	0.104
Eicosanoid metabolism via cytochrome P450 monooxygenases (CYP) pathway	0	3	23	0	-0.29	0.999
eIF5A regulation in response to inhibition of the nuclear export system	0	3	6	0	-0.29	0.374
Ethylmalonic encephalopathy	0	3	20	0	-0.29	0.996
Glycine metabolism	0	3	19	0	-0.29	0.996
Hypothetical craniofacial development pathway	0	3	11	0	-0.29	0.851
Kinin-Kallikrein pathway	0	3	10	0	-0.29	0.782
Oxytocin signaling	0	3	10	0	-0.29	0.804
SARS-CoV-2 altering angiogenesis via NRP1	0	3	11	0	-0.29	0.868
SARS-CoV-2 and angiotensin-converting enzyme 2 receptor: molecular mechanisms	0	3	14	0	-0.29	0.967
Serotonin receptor 2 and STAT3 signaling	0	3	6	0	-0.29	0.354
Somitogenesis in the context of spondylocostal dysostosis	0	3	10	0	-0.29	0.821
Vitamins A and D - action mechanisms	0	3	14	0	-0.29	0.961
Vitamin B6-dependent and responsive disorders	0	3	29	0	-0.29	0.999
Interferon type I signaling pathways	1	50	57	0.02	-0.29	0.874
Novel intracellular components of RIG-I-like receptor (RLR) pathway	1	50	64	0.02	-0.29	0.76
Genotoxicity pathway	1	52	65	0.0192	-0.33	0.692
Aflatoxin B1 metabolism	0	4	16	0	-0.33	0.946
GABA metabolism (aka GHB)	0	4	42	0	-0.33	0.998
let-7 inhibition of ES cell reprogramming	0	4	17	0	-0.33	0.956
Linoleic acid metabolism affected by coronavirus infection	0	4	28	0	-0.33	0.999
Metabolism of alpha-linolenic acid	0	4	27	0	-0.33	0.999
miR-222 in exercise-induced cardiac growth	0	4	5	0	-0.33	0.076
Peroxiredoxin 2 induced ovarian failure	0	4	13	0	-0.33	0.822
Peroxisomal beta-oxidation of tetracosanoyl-CoA	0	4	17	0	-0.33	0.973
Robo4 and VEGF signaling pathways crosstalk	0	4	7	0	-0.33	0.249
SCFA and skeletal muscle substrate metabolism	0	4	17	0	-0.33	0.964
Somatic sex determination	0	4	15	0	-0.33	0.924
Sulindac metabolic pathway	0	4	11	0	-0.33	0.718
Tgif disruption of Shh signaling	0	4	10	0	-0.33	0.594
Mesodermal commitment pathway	2	97	154	0.0206	-0.37	0.709
Arachidonate epoxygenase / epoxide hydrolase	0	5	18	0	-0.37	0.939
Benzo(a)pyrene metabolism	0	5	17	0	-0.37	0.91
Biogenic amine synthesis	0	5	33	0	-0.37	0.999
Caloric restriction and aging	0	5	13	0	-0.37	0.679
Cell-type dependent selectivity of CCK2R signaling	0	5	26	0	-0.37	0.994
Cholesterol biosynthesis with skeletal dysplasias	0	5	23	0	-0.37	0.987
Codeine and morphine metabolism	0	5	25	0	-0.37	0.994
Drug induction of bile acid pathway	0	5	45	0	-0.37	0.976
Effects of nitric oxide	0	5	16	0	-0.37	0.862
Farnesoid X receptor pathway	0	5	21	0	-0.37	0.974
Folate-alcohol and cancer pathway hypotheses	0	5	24	0	-0.37	0.99
FTO obesity variant mechanism	0	5	11	0	-0.37	0.516
Gamma-glutamyl cycle for the biosynthesis and degradation of glutathione, including diseases	0	5	24	0	-0.37	0.995
Glial cell differentiation	0	5	9	0	-0.37	0.271
Irinotecan pathway	0	5	18	0	-0.37	0.933
Lamin A-processing pathway	0	5	8	0	-0.37	0.181
mir-124 predicted interactions with cell cycle and differentiation	0	5	8	0	-0.37	0.188
PTF1A related regulatory pathway	0	5	12	0	-0.37	0.579
Steroid biosynthesis	0	5	25	0	-0.37	0.993
TCA cycle nutrient use and invasiveness of ovarian cancer	0	5	11	0	-0.37	0.505
Acetylcholine synthesis	0	6	18	0	-0.4	0.844
Alternative pathway of fetal androgen synthesis	0	6	48	0	-0.4	0.92
ATR signaling	0	6	10	0	-0.4	0.23
Bile acids synthesis and enterohepatic circulation	0	6	18	0	-0.4	0.859
Biomarkers for urea cycle disorders	0	6	51	0	-0.4	0.875
BMP2-WNT4-FOXO1 pathway in primary endometrial stromal cell differentiation	0	6	16	0	-0.4	0.756
Degradation pathway of sphingolipids, including diseases	0	6	41	0	-0.4	0.989
exRNA mechanism of action and biogenesis	0	6	8	0	-0.4	0.116
Gene regulatory network modelling somitogenesis	0	6	13	0	-0.4	0.508
Glucuronidation	0	6	41	0	-0.4	0.988
Heme biosynthesis	0	6	28	0	-0.4	0.999
Insulin signaling in adipocytes (diabetic condition)	0	6	12	0	-0.4	0.401
Insulin signaling in adipocytes (normal condition)	0	6	15	0	-0.4	0.678
Krebs cycle disorders	0	6	34	0	-0.4	0.998
Lipid particles composition	0	6	21	0	-0.4	0.947
Liver X receptor pathway	0	6	12	0	-0.4	0.385
Metastatic brain tumor	0	6	28	0	-0.4	0.996
MicroRNA for targeting cancer growth and vascularization in glioblastoma	0	6	10	0	-0.4	0.225
miRNA biogenesis	0	6	7	0	-0.4	0.092
Mitochondrial fatty acid synthesis pathway	0	6	21	0	-0.4	0.944
Molybdenum cofactor (Moco) biosynthesis	0	6	21	0	-0.4	0.959
Phase I biotransformations, non P450	0	6	13	0	-0.4	0.499
Pilocytic astrocytoma	0	6	14	0	-0.4	0.583
SARS-CoV-2 B.1.1.7 variant antagonises innate immune activation	0	6	15	0	-0.4	0.681
Somatroph axis (GH) and its relationship to dietary restriction and aging	0	6	12	0	-0.4	0.405
ncRNAs involved in Wnt signaling in hepatocellular carcinoma	1	57	96	0.0175	-0.42	0.642
15q11.2 copy number variation syndrome	0	7	13	0	-0.44	0.321
ACE inhibitor pathway	0	7	29	0	-0.44	0.994
Activation of NLRP3 inflammasome by SARS-CoV-2	0	7	10	0	-0.44	0.148
Altered glycosylation of MUC1 in tumor microenvironment	0	7	10	0	-0.44	0.146
Cellular proteostasis	0	7	15	0	-0.44	0.5
Cerebral organic acidurias, including diseases	0	7	46	0	-0.44	0.922
DDX1 as a regulatory component of the Drosha microprocessor	0	7	8	0	-0.44	0.104
EDA signaling in hair follicle development	0	7	15	0	-0.44	0.486
EV release from cardiac cells and their functional effects	0	7	17	0	-0.44	0.647
Interleukin-1 induced activation of NF-kB	0	7	13	0	-0.44	0.345
SARS-CoV-2 and COVID-19 pathway	0	7	70	0	-0.44	0.649
Type III interferon signaling	0	7	11	0	-0.44	0.208
Valproic acid pathway	0	7	36	0	-0.44	0.998
Regulation of actin cytoskeleton	2	103	160	0.0194	-0.45	0.689
Acquired partial lipodystrophy / Barraquer-Simons syndrome	0	8	17	0	-0.47	0.539
Alanine and aspartate metabolism	0	8	66	0	-0.47	0.612
ApoE and miR-146 in inflammation and atherosclerosis	0	8	13	0	-0.47	0.228
Bone morphogenic protein (BMP) signaling and regulation	0	8	13	0	-0.47	0.244
Canonical NF-kB pathway	0	8	9	0	-0.47	0.093
Classical pathway of steroidogenesis with glucocorticoid and mineralocorticoid metabolism	0	8	73	0	-0.47	0.625
Dual hijack model of Vif in HIV infection	0	8	10	0	-0.47	0.132
Ethanol metabolism production of ROS by CYP2E1	0	8	28	0	-0.47	0.968
Hijack of ubiquitination by SARS-CoV-2	0	8	12	0	-0.47	0.169
IL-10 anti-inflammatory signaling pathway	0	8	19	0	-0.47	0.663
Macrophage markers	0	8	10	0	-0.47	0.096
Mitochondrial complex II assembly	0	8	10	0	-0.47	0.134
NAD biosynthesis II (from tryptophan)	0	8	34	0	-0.47	0.995
Nanomaterial-induced inflammasome activation	0	8	13	0	-0.47	0.208
Nicotine effect on dopaminergic neurons	0	8	31	0	-0.47	0.99
NIPBL role in DNA damage - Cornelia de Lange syndrome	0	8	9	0	-0.47	0.107
Non-homologous end joining	0	8	11	0	-0.47	0.128
Omega-9 fatty acid synthesis	0	8	44	0	-0.47	0.923
Supression of HMGB1 mediated inflammation by THBD	0	8	10	0	-0.47	0.116
Transcription factors regulate miRNAs related to cardiac hypertrophy	0	8	16	0	-0.47	0.44
T-cell activation SARS-CoV-2	1	61	98	0.0164	-0.5	0.611
Aerobic glycolysis	0	9	35	0	-0.5	0.991
Biotin metabolism, including IEMs	0	9	38	0	-0.5	0.98
Blood clotting cascade	0	9	27	0	-0.5	0.903
Cytokines and inflammatory response	0	9	32	0	-0.5	0.978
Estrogen receptor pathway	0	9	16	0	-0.5	0.323
Familial hyperlipidemia type 2	0	9	36	0	-0.5	0.994
Familial hyperlipidemia type 3	0	9	24	0	-0.5	0.812
Familial hyperlipidemia type 5	0	9	28	0	-0.5	0.952
GDNF/RET signaling axis	0	9	24	0	-0.5	0.828
Genes targeted by miRNAs in adipocytes	0	9	19	0	-0.5	0.527
Inclusion body myositis	0	9	27	0	-0.5	0.924
lncRNA-mediated mechanisms of therapeutic resistance	0	9	14	0	-0.5	0.181
Major receptors targeted by epinephrine and norepinephrine	0	9	34	0	-0.5	0.984
Mammary gland development pathway - Embryonic development (Stage 1 of 4)	0	9	21	0	-0.5	0.641
Methionine metabolism leading to sulfur amino acids and related disorders	0	9	46	0	-0.5	0.887
Nod-like receptor (NLR) signaling pathway	0	9	11	0	-0.5	0.136
Nucleotide GPCRs	0	9	15	0	-0.5	0.268
SRF and miRs in smooth muscle differentiation and proliferation	0	9	18	0	-0.5	0.444
TCA cycle in senescence	0	9	30	0	-0.5	0.961
Vitamin B12 disorders	0	9	36	0	-0.5	0.995
Epithelial to mesenchymal transition in colorectal cancer	2	107	163	0.0187	-0.51	0.688
Myometrial relaxation and contraction pathways	2	107	161	0.0187	-0.51	0.686
AGE/RAGE pathway	1	62	67	0.0161	-0.51	0.631
Complement system	1	62	143	0.0161	-0.51	0.675
Autosomal recessive osteopetrosis pathways	0	10	14	0	-0.52	0.173
Cancer immunotherapy by CTLA4 blockade	0	10	21	0	-0.52	0.545
Differentiation of white and brown adipocyte	0	10	26	0	-0.52	0.82
Dopaminergic neurogenesis	0	10	32	0	-0.52	0.955
Familial hyperlipidemia type 1	0	10	35	0	-0.52	0.97
Mammalian disorder of sexual development	0	10	29	0	-0.52	0.911
MAPK and NFkB signaling pathways inhibited by Yersinia YopJ	0	10	13	0	-0.52	0.154
NAD metabolism, sirtuins and aging	0	10	16	0	-0.52	0.22
SMC1/SMC3 role in DNA damage - Cornelia de Lange Syndrome	0	10	12	0	-0.52	0.149
Trans-sulfuration pathway	0	10	25	0	-0.52	0.768
Chromosomal and microsatellite instability in colorectal cancer	1	63	81	0.0159	-0.53	0.645
Histone modifications	1	63	68	0.0159	-0.53	0.639
Joubert syndrome	1	63	87	0.0159	-0.53	0.621
Aspirin and miRNAs	0	11	24	0	-0.55	0.61
Complement activation	0	11	24	0	-0.55	0.621
ERK pathway in Huntington's disease	0	11	17	0	-0.55	0.227
Fatty acid transporters	0	11	28	0	-0.55	0.8
Genes associated with the development of rheumatoid arthritis	0	11	22	0	-0.55	0.461
GPR40 pathway	0	11	20	0	-0.55	0.337
Hedgehog signaling pathway Netpath	0	11	17	0	-0.55	0.198
Nitric oxide metabolism in cystic fibrosis	0	11	25	0	-0.55	0.679
Omega-3 / omega-6 fatty acid synthesis	0	11	53	0	-0.55	0.7
Purine metabolism	0	11	94	0	-0.55	0.579
RalA downstream regulated genes	0	11	13	0	-0.55	0.157
Small ligand GPCRs	0	11	25	0	-0.55	0.66
Transcriptional cascade regulating adipogenesis	0	11	14	0	-0.55	0.179
Angiopoietin-like protein 8 regulatory pathway	2	110	157	0.0182	-0.55	0.675
Breast cancer pathway	2	110	167	0.0182	-0.55	0.643
Airway smooth muscle cell contraction	0	12	25	0	-0.57	0.517
Familial hyperlipidemia type 4	0	12	36	0	-0.57	0.943
GABA receptor signaling	0	12	57	0	-0.57	0.663
Ganglio sphingolipid metabolism	0	12	56	0	-0.57	0.668
Globo sphingolipid metabolism	0	12	28	0	-0.57	0.688
GPCRs, class B secretin-like	0	12	24	0	-0.57	0.528
H19 action Rb-E2F1 signaling and CDK-Beta-catenin activity	0	12	17	0	-0.57	0.191
Homologous recombination	0	12	14	0	-0.57	0.156
Kennedy pathway from sphingolipids	0	12	35	0	-0.57	0.922
Mammary gland development pathway - Puberty (Stage 2 of 4)	0	12	15	0	-0.57	0.171
Mevalonate arm of cholesterol biosynthesis pathway	0	12	55	0	-0.57	0.657
Nanoparticle triggered regulated necrosis	0	12	26	0	-0.57	0.599
PKC-gamma calcium signaling pathway in ataxia	0	12	29	0	-0.57	0.754
Regulation of Wnt / B-catenin signaling by small molecule compounds	0	12	33	0	-0.57	0.891
G protein signaling pathways	1	66	97	0.0152	-0.58	0.595
TGF-beta signaling pathway	2	113	133	0.0177	-0.59	0.512
Amplification and expansion of oncogenic pathways as metastatic traits	0	13	18	0	-0.6	0.206
BMP signaling in eyelid development	0	13	23	0	-0.6	0.364
Cholesterol biosynthesis pathway	0	13	32	0	-0.6	0.766
Extracellular vesicles in the crosstalk of cardiac cells	0	13	30	0	-0.6	0.708
MAP3K1 role in promoting and blocking gonadal determination	0	13	18	0	-0.6	0.2
miR-509-3p alteration of YAP1/ECM axis	0	13	19	0	-0.6	0.227
Monoamine GPCRs	0	13	43	0	-0.6	0.872
NAD+ metabolism	0	13	34	0	-0.6	0.838
TCA cycle and deficiency of pyruvate dehydrogenase complex (PDHc)	0	13	37	0	-0.6	0.893
Hippo signaling regulation pathways	1	68	104	0.0147	-0.61	0.526
Cancer immunotherapy by PD-1 blockade	0	14	35	0	-0.62	0.797
Constitutive androstane receptor pathway	0	14	34	0	-0.62	0.763
Cysteine and methionine catabolism	0	14	74	0	-0.62	0.629
Mitochondrial gene expression	0	14	23	0	-0.62	0.294
Regulation of sister chromatid separation at the metaphase-anaphase transition	0	14	16	0	-0.62	0.18
Riboflavin and CoQ disorders	0	14	59	0	-0.62	0.636
Amino acid metabolism	1	69	205	0.0145	-0.63	0.517
Wnt signaling pathway and pluripotency	1	69	106	0.0145	-0.63	0.497
Apoptosis modulation by HSP70	0	15	22	0	-0.64	0.249
Imatinib and chronic myeloid leukemia	0	15	25	0	-0.64	0.304
Metabolism of spingolipids in ER and Golgi apparatus	0	15	72	0	-0.64	0.629
miRNA targets in ECM and membrane receptors	0	15	46	0	-0.64	0.767
SARS coronavirus and innate immunity	0	15	33	0	-0.64	0.658
Serotonin receptor 4/6/7 and NR3C signaling	0	15	22	0	-0.64	0.243
Transcription factor regulation in adipogenesis	0	15	24	0	-0.64	0.303
Type II diabetes mellitus	0	15	28	0	-0.64	0.4
Hepatitis B infection	2	117	155	0.0171	-0.64	0.612
Osteoblast differentiation and related diseases	1	70	119	0.0143	-0.64	0.424
Eicosanoid synthesis	0	16	57	0	-0.66	0.649
Hypertrophy model	0	16	21	0	-0.66	0.22
IL-9 signaling pathway	0	16	18	0	-0.66	0.2
Inflammatory response pathway	0	16	34	0	-0.66	0.594
Interactome of polycomb repressive complex 2 (PRC2)	0	16	17	0	-0.66	0.186
Kynurenine pathway and links to cell senescence	0	16	56	0	-0.66	0.654
Ovarian infertility	0	16	33	0	-0.66	0.562
Overview of interferons-mediated signaling pathway	0	16	38	0	-0.66	0.685
Pathways of nucleic acid metabolism and innate immune sensing	0	16	39	0	-0.66	0.719
PI3K/AKT/mTOR - VitD3 signaling	0	16	34	0	-0.66	0.566
Pregnane X receptor pathway	0	16	35	0	-0.66	0.644
Serotonin receptor 2 and ELK-SRF/GATA4 signaling	0	16	24	0	-0.66	0.251
TP53 network	0	16	23	0	-0.66	0.24
4-hydroxytamoxifen, Dexamethasone, and Retinoic Acids Regulation of p27 Expression	0	17	31	0	-0.68	0.434
Angiogenesis	0	17	25	0	-0.68	0.277
Eicosanoid metabolism via cyclooxygenases (COX)	0	17	70	0	-0.68	0.642
Eicosanoid metabolism via lipooxygenases (LOX)	0	17	70	0	-0.68	0.617
Methionine de novo and salvage pathway	0	17	74	0	-0.68	0.596
Proteoglycan biosynthesis	0	17	36	0	-0.68	0.537
RAS and bradykinin pathways in COVID-19	0	17	51	0	-0.68	0.674
TCA cycle (aka Krebs or citric acid cycle)	0	17	49	0	-0.68	0.682
Transcription co-factors SKI and SKIL protein partners	0	17	19	0	-0.68	0.212
Triacylglyceride synthesis	0	17	37	0	-0.68	0.586
Pyrimidine metabolism	1	74	140	0.0135	-0.7	0.448
Fatty acid biosynthesis	0	18	43	0	-0.7	0.623
Hypothesized pathways in pathogenesis of cardiovascular disease	0	18	27	0	-0.7	0.293
Inhibition of exosome biogenesis and secretion by Manumycin A in CRPC cells	0	18	19	0	-0.7	0.204
mBDNF and proBDNF regulation of GABA neurotransmission	0	18	40	0	-0.7	0.573
Purine metabolism and related disorders	0	18	139	0	-0.7	0.44
Selective expression of chemokine receptors during T-cell polarization	0	18	30	0	-0.7	0.336
Urea cycle and associated pathways	0	18	81	0	-0.7	0.629
Urea cycle and metabolism of amino groups	0	18	71	0	-0.7	0.595
Vitamin A and carotenoid metabolism	0	18	65	0	-0.7	0.646
Wnt/beta-catenin signaling pathway in leukemia	0	18	29	0	-0.7	0.319
15q13.3 copy number variation syndrome	0	19	40	0	-0.72	0.47
Angiotensin II receptor type 1 pathway	0	19	37	0	-0.72	0.409
Disruption of postsynaptic signaling by CNV	0	19	35	0	-0.72	0.366
Hematopoietic stem cell gene regulation by GABP alpha/beta complex	0	19	26	0	-0.72	0.294
STING pathway in Kawasaki-like disease and COVID-19	0	19	26	0	-0.72	0.267
1q21.1 copy number variation syndrome	0	20	58	0	-0.74	0.618
Hippo-Yap signaling pathway	0	20	24	0	-0.74	0.268
Host-pathogen interaction of human coronaviruses - apoptosis	0	20	34	0	-0.74	0.323
Host-pathogen interaction of human coronaviruses - autophagy	0	20	23	0	-0.74	0.23
Intracellular trafficking proteins involved in CMT neuropathy	0	20	28	0	-0.74	0.295
miRNA regulation of p53 pathway in prostate cancer	0	20	37	0	-0.74	0.335
NAD+ biosynthetic pathways	0	20	37	0	-0.74	0.356
Progeria-associated lipodystrophy	0	20	36	0	-0.74	0.346
Regulation of apoptosis by parathyroid hormone-related protein	0	20	24	0	-0.74	0.265
T cell receptor and co-stimulatory signaling	0	20	45	0	-0.74	0.486
Cannabinoid receptor signaling	0	21	54	0	-0.76	0.586
Genes controlling nephrogenesis	0	21	45	0	-0.76	0.417
Glycerolipids and glycerophospholipids	0	21	52	0	-0.76	0.543
Purinergic signaling	0	21	96	0	-0.76	0.518
S1P receptor signal transduction	0	21	26	0	-0.76	0.243
Sphingolipid metabolism overview	0	21	55	0	-0.76	0.57
Cell migration and invasion through p75NTR	0	22	31	0	-0.78	0.292
DNA mismatch repair	0	22	25	0	-0.78	0.256
Endothelin pathways	0	22	48	0	-0.78	0.409
Heart development	0	22	48	0	-0.78	0.416
Immune response to tuberculosis	0	22	24	0	-0.78	0.278
Sphingolipid metabolism: integrated pathway	0	22	97	0	-0.78	0.449
Wnt signaling in kidney disease	0	22	39	0	-0.78	0.253
Canonical and non-canonical Notch signaling	0	23	31	0	-0.79	0.276
Common pathways underlying drug addiction	0	23	50	0	-0.79	0.382
Development of ureteric collection system	0	23	63	0	-0.79	0.605
EPO receptor signaling	0	23	27	0	-0.79	0.295
FGFR3 signaling in chondrocyte proliferation and terminal differentiation	0	23	29	0	-0.79	0.285
Follicle stimulating hormone (FSH) signaling pathway	0	23	28	0	-0.79	0.288
Glycosylation and related congenital defects	0	23	73	0	-0.79	0.632
IL-7 signaling pathway	0	23	26	0	-0.79	0.276
Mammary gland development pathway - Pregnancy and lactation (Stage 3 of 4)	0	23	42	0	-0.79	0.227
Prostaglandin and leukotriene metabolism in senescence	0	23	57	0	-0.79	0.562
Relationship between inflammation, COX-2 and EGFR	0	23	29	0	-0.79	0.268
Unfolded protein response	0	23	28	0	-0.79	0.264
Extracellular vesicle-mediated signaling in recipient cells	0	24	31	0	-0.81	0.299
Gastric cancer network 1	0	24	30	0	-0.81	0.261
IL-17 signaling pathway	0	24	33	0	-0.81	0.278
Intraflagellar transport proteins binding to dynein	0	24	28	0	-0.81	0.29
Lipid metabolism pathway	0	24	43	0	-0.81	0.207
Mitochondrial immune response to SARS-CoV-2	0	24	62	0	-0.81	0.574
Nuclear receptors	0	24	44	0	-0.81	0.236
White fat cell differentiation	0	24	35	0	-0.81	0.235
Androgen receptor signaling pathway	1	83	90	0.012	-0.83	0.519
Autophagy	0	25	33	0	-0.83	0.254
Photodynamic therapy-induced unfolded protein response	0	25	28	0	-0.83	0.286
Regucalcin in proximal tubule epithelial kidney cells	0	25	68	0	-0.83	0.593
Sphingolipid metabolism in senescence	0	25	49	0	-0.83	0.253
Type I collagen synthesis in the context of osteogenesis imperfecta	0	25	36	0	-0.83	0.236
Base excision repair	0	26	32	0	-0.84	0.227
Nanoparticle-mediated activation of receptor signaling	0	26	36	0	-0.84	0.169
Signal transduction through IL1R	0	26	34	0	-0.84	0.223
CAMKK2 pathway	0	27	143	0	-0.86	0.365
Kisspeptin/kisspeptin receptor system in the ovary	0	27	49	0	-0.86	0.203
Peptide GPCRs	0	27	79	0	-0.86	0.564
Sphingolipid pathway	0	27	63	0	-0.86	0.487
Alpha 6 beta 4 signaling pathway	0	28	34	0	-0.88	0.201
BDNF-TrkB signaling	0	28	38	0	-0.88	0.163
Familial partial lipodystrophy (FPLD)	0	28	44	0	-0.88	0.14
NO/cGMP/PKG mediated neuroprotection	0	28	65	0	-0.88	0.506
Renin-angiotensin-aldosterone system (RAAS)	0	28	57	0	-0.88	0.326
Initiation of transcription and translation elongation at the HIV-1 LTR	0	29	35	0	-0.89	0.194
p38 MAPK signaling pathway	0	29	36	0	-0.89	0.175
PI3K-AKT-mTOR signaling pathway and therapeutic opportunities	0	29	33	0	-0.89	0.201
Complement and coagulation cascades	0	30	63	0	-0.91	0.355
Factors and pathways affecting insulin-like growth factor (IGF1)-Akt signaling	0	30	43	0	-0.91	0.136
G13 signaling pathway	0	30	39	0	-0.91	0.113
Oxidative damage response	0	30	44	0	-0.91	0.119
Type 2 papillary renal cell carcinoma	0	30	41	0	-0.91	0.112
Cohesin complex - Cornelia de Lange syndrome	0	31	37	0	-0.92	0.151
Pre-implantation embryo	0	31	60	0	-0.92	0.269
Synaptic vesicle pathway	0	31	59	0	-0.92	0.273
EGF/EGFR signaling pathway	2	142	163	0.0141	-0.93	0.269
Glycogen synthesis and degradation	0	32	54	0	-0.94	0.169
Hedgehog signaling pathway	0	32	44	0	-0.94	0.104
Influence of laminopathies on Wnt signaling	0	32	45	0	-0.94	0.113
Mitochondrial complex IV assembly	0	32	40	0	-0.94	0.118
Glycolysis and gluconeogenesis	0	33	69	0	-0.95	0.353
Microglia pathogen phagocytosis pathway	0	33	44	0	-0.95	0.115
Ciliary landscape	3	192	215	0.0156	-0.95	0.361
Integrated breast cancer pathway	2	145	200	0.0138	-0.96	0.35
Eukaryotic transcription initiation	0	35	42	0	-0.98	0.113
Target of rapamycin (TOR) signaling	0	35	40	0	-0.98	0.096
Rett syndrome causing genes	0	36	60	0	-0.99	0.182
GPCRs, class A rhodopsin-like	1	97	272	0.0103	-1	0.294
Envelope proteins and their potential roles in EDMD physiopathology	0	37	47	0	-1.01	0.115
Microtubule cytoskeleton regulation	0	39	47	0	-1.03	0.127
Phosphoinositides metabolism	0	39	89	0	-1.03	0.372
Focal adhesion	2	152	201	0.0132	-1.04	0.271
Neurodegeneration with brain iron accumulation (NBIA) subtypes pathway	0	41	77	0	-1.06	0.203
Energy metabolism	0	42	49	0	-1.07	0.132
Translation inhibitors in chronically activated PDGFRA cells	0	42	49	0	-1.07	0.125
Cardiac hypertrophic response	0	44	61	0	-1.1	0.182
Synaptic signaling pathways associated with autism spectrum disorder	0	44	55	0	-1.1	0.148
DNA repair pathways, full network	1	106	125	0.0094	-1.1	0.355
Wnt signaling pathway	0	45	52	0	-1.11	0.134
Brain-derived neurotrophic factor (BDNF) signaling pathway	1	107	150	0.0093	-1.11	0.271
Overlap between signal transduction pathways contributing to LMNA laminopathies	0	48	73	0	-1.15	0.15
MECP2 and associated Rett syndrome	0	49	114	0	-1.16	0.342
DNA IR-double strand breaks and cellular response via ATM	0	52	65	0	-1.19	0.167
Mitochondrial complex I assembly model OXPHOS system	0	53	61	0	-1.21	0.139
Cytosolic DNA-sensing pathway	0	54	77	0	-1.22	0.092
mRNA processing	1	117	130	0.0085	-1.22	0.272
Pathways affected in adenoid cystic carcinoma	0	56	72	0	-1.24	0.112
Proteasome degradation	0	59	67	0	-1.27	0.105
RAC1/PAK1/p38/MMP2 pathway	0	59	74	0	-1.27	0.086
Oxidative phosphorylation	0	61	68	0	-1.29	0.094
Non-small cell lung cancer	0	62	88	0	-1.31	0.095
16p11.2 proximal deletion syndrome	0	63	152	0	-1.32	0.251
lncRNA in canonical Wnt signaling and colorectal cancer	0	63	102	0	-1.32	0.126
Sterol regulatory element-binding proteins (SREBP) signaling	0	63	77	0	-1.32	0.079
Clear cell renal cell carcinoma pathways	0	66	92	0	-1.35	0.096
Ras signaling	1	130	192	0.0077	-1.35	0.178
Acute viral myocarditis	0	70	110	0	-1.39	0.085
Ciliopathies	1	137	184	0.0073	-1.41	0.173
MicroRNAs in cardiomyocyte hypertrophy	0	73	109	0	-1.42	0.101
ErbB signaling pathway	0	75	101	0	-1.44	0.095
Pancreatic adenocarcinoma pathway	0	78	97	0	-1.47	0.092
Wnt signaling	0	78	121	0	-1.47	0.071
B cell receptor signaling pathway	0	79	99	0	-1.47	0.098
Genes related to primary cilium development (based on CRISPR)	0	89	104	0	-1.57	0.069
DNA damage response (only ATM dependent)	0	91	118	0	-1.58	0.065
Calcium regulation in cardiac cells	0	96	167	0	-1.63	0.059
Electron transport chain: OXPHOS system in mitochondria	0	98	119	0	-1.64	0.054
Endoderm differentiation	0	101	147	0	-1.67	0.057
Chemokine signaling pathway	0	127	172	0	-1.88	0.038
Alzheimer's disease	1	207	288	0.0048	-1.97	0.045
Alzheimer's disease and miRNA effects	1	208	358	0.0048	-1.97	0.047
Acrylamide biotransformation and exposure biomarkers	0	0	10	NaN%	NaN	0
Amino acid conjugation of benzoic acid	0	0	15	NaN%	NaN	0
Amino acid conjugation	0	0	7	NaN%	NaN	0
Biochemical pathways: part I	0	0	471	NaN%	NaN	0
Blood clotting and drug effects	0	0	13	NaN%	NaN	0
Colchicine metabolic pathway	0	0	5	NaN%	NaN	0
Felbamate metabolism	0	0	12	NaN%	NaN	0
Lidocaine metabolism	0	0	11	NaN%	NaN	0
Liver steatosis adverse outcome pathway	0	0	46	NaN%	NaN	0
Metabolism of dichloroethylene by CYP450	0	0	13	NaN%	NaN	0
Metabolism of tetrahydrocannabinol (THC)	0	0	11	NaN%	NaN	0
Metabolism overview	0	0	116	NaN%	NaN	0
Meta pathway lipodystrophy, dyslipidemia and hyperlipidemia	0	0	13	NaN%	NaN	0
Mitochondrial complex I inhibition leading to chemical-induced Fanconi syndrome	0	0	21	NaN%	NaN	0
Modified nucleosides derived from tRNA as urinary cancer markers	0	0	21	NaN%	NaN	0
Ophthalmate biosynthesis in hepatocytes	0	0	10	NaN%	NaN	0
Phosphatidylcholine catabolism	0	0	32	NaN%	NaN	0
Role of carnosine in muscle contraction	0	0	14	NaN%	NaN	0

## Sheet: THP1_Perfectha_SD_adjPvalue005
Statistics results for Fri Dec 10 21:26:46 CET 2021
Dataset: J:\FHML_TGX\Danyel.Jennen\ProjectFolder\Projects\Filler-project\THP1_Perfectha\pathvisio\noflags\THP1_Perfectha_limma_OUTPUT_TABLE.pgex
Pathway directory: D:\wikipathways-20211110-gpml-Homo_sapiens
Gene database: D:\pathvisio-3.3.0\Hs_Derby_Ensembl_91.bridge
Criterion: [SD_adj.P.Val] < 0.05
Calculation method: pathway-centric. Calculations are performed after mapping data to pathways.
Total data points (N): 8363
Data points meeting criterion (R): 198
Pathway	positive (r)	measured (n)	total	%	Z Score	p-value (permuted)
Retinoblastoma gene in cancer	11	79	98	0.1392	6.79	0
G1 to S cell cycle control	9	58	68	0.1552	6.61	0
Ultraconserved region 339 modulation of tumor suppressor microRNAs in cancer	1	1	6	1	6.42	0.002
Antiviral and anti-inflammatory effects of Nrf2 on SARS-CoV-2 pathway	5	23	50	0.2174	6.12	0
miRNAs involved in DNA damage response	5	25	70	0.2	5.81	0
Oxidative stress response	5	25	35	0.2	5.81	0
DNA replication	6	37	50	0.1622	5.55	0
Pentose phosphate metabolism	2	5	21	0.4	5.54	0
Ferroptosis	6	40	88	0.15	5.27	0
ID signaling pathway	3	12	17	0.25	5.16	0.001
Pluripotent stem cell differentiation pathway	4	21	64	0.1905	5.03	0
Hepatitis C and hepatocellular carcinoma	6	45	63	0.1333	4.85	0.001
Nuclear receptors meta-pathway	15	204	339	0.0735	4.74	0
NRF2 pathway	9	92	145	0.0978	4.7	0
Transcriptional activation by NRF2 in response to phytochemicals	3	14	20	0.2143	4.69	0
COVID-19 adverse outcome pathway	2	7	24	0.2857	4.56	0.003
Glutathione metabolism	3	15	57	0.2	4.5	0.004
Tyrosine metabolism	1	2	27	0.5	4.43	0.001
Cell cycle	9	105	124	0.0857	4.21	0.001
Iron metabolism in placenta	2	10	15	0.2	3.67	0.01
miRNA regulation of DNA damage response	6	66	106	0.0909	3.61	0.007
NRF2-ARE regulation	3	22	24	0.1364	3.48	0.005
Photodynamic therapy-induced NFE2L2 (NRF2) survival signaling	3	22	24	0.1364	3.48	0.008
p53 transcriptional gene network	5	53	78	0.0943	3.39	0.002
Biomarkers for pyrimidine metabolism disorders	2	13	88	0.1538	3.09	0.008
Fluoropyrimidine activity	3	27	58	0.1111	2.99	0.008
Benzene metabolism	1	4	17	0.25	2.98	0.015
Sulindac metabolic pathway	1	4	11	0.25	2.98	0.016
Glucocorticoid receptor pathway	4	49	73	0.0816	2.68	0.018
Gamma-glutamyl cycle for the biosynthesis and degradation of glutathione, including diseases	1	5	24	0.2	2.59	0.021
Hfe effect on hepcidin production	1	5	8	0.2	2.59	0.044
miR-517 relationship with ARCN1 and USP1	1	5	7	0.2	2.59	0.05
Serine metabolism	1	5	43	0.2	2.59	0.02
Overview of proinflammatory and profibrotic mediators	4	55	134	0.0727	2.4	0.024
Estrogen metabolism	1	6	45	0.1667	2.3	0.037
HIF1A and PPARG regulation of glycolysis	1	6	19	0.1667	2.3	0.018
ATM signaling pathway	3	37	50	0.0811	2.3	0.027
Hair follicle development: organogenesis - part 2 of 3	2	20	36	0.1	2.25	0.042
One-carbon metabolism and related pathways	3	39	94	0.0769	2.19	0.015
Ebstein-Barr virus LMP1 signaling	2	21	25	0.0952	2.16	0.037
Selenium micronutrient network	4	62	198	0.0645	2.12	0.034
DNA mismatch repair	2	22	25	0.0909	2.08	0.034
Prostaglandin signaling	2	22	40	0.0909	2.08	0.05
Dopamine metabolism	1	7	48	0.1429	2.07	0.05
LDLRAD4 and what we know about it	1	7	12	0.1429	2.07	0.069
Folate metabolism	3	42	142	0.0714	2.04	0.037
One-carbon metabolism	2	23	58	0.087	2	0.036
Senescence and autophagy in cancer	5	91	112	0.0549	1.97	0.035
Gastric cancer network 2	2	24	33	0.0833	1.92	0.039
VEGFA-VEGFR2 signaling pathway	14	362	436	0.0387	1.92	0.049
Leptin and adiponectin	1	8	14	0.125	1.89	0.098
Sulfation biotransformation reaction	1	8	29	0.125	1.89	0.053
Supression of HMGB1 mediated inflammation by THBD	1	8	10	0.125	1.89	0.092
DNA IR-damage and cellular response via ATR	4	69	90	0.058	1.88	0.067
Network map of SARS-CoV-2 signaling pathway	7	150	324	0.0467	1.87	0.06
Trans-sulfuration and one-carbon metabolism	2	25	66	0.08	1.85	0.05
Malignant pleural mesothelioma	12	308	468	0.039	1.8	0.059
Burn wound healing	4	72	124	0.0556	1.79	0.034
Blood clotting cascade	1	9	27	0.1111	1.73	0.052
NOTCH1 regulation of endothelial cell calcification	1	9	18	0.1111	1.73	0.092
Pathogenesis of SARS-CoV-2 mediated by nsp9-nsp10 complex	1	9	34	0.1111	1.73	0.056
Vitamin D-sensitive calcium signaling in depression	2	27	55	0.0741	1.73	0.07
Spinal cord injury	4	75	127	0.0533	1.7	0.052
SARS-CoV-2 innate immunity evasion and cell-specific immune response	3	52	92	0.0577	1.62	0.078
TYROBP causal network in microglia	3	52	61	0.0577	1.62	0.083
Aryl hydrocarbon receptor pathway	2	29	49	0.069	1.61	0.11
Cells and molecules involved in local acute inflammatory response	1	10	19	0.1	1.59	0.112
Cori cycle	1	10	53	0.1	1.59	0.105
Disorders of folate metabolism and transport	1	10	46	0.1	1.59	0.085
FOXP3 in COVID-19	1	10	19	0.1	1.59	0.097
Glycolysis in senescence	1	10	26	0.1	1.59	0.057
Vitamin B12 metabolism	2	30	118	0.0667	1.55	0.081
Neural crest differentiation	3	54	102	0.0556	1.55	0.097
Cohesin complex - Cornelia de Lange syndrome	2	31	37	0.0645	1.5	0.068
FGF23 signaling in hypophosphatemic rickets and related disorders	1	11	28	0.0909	1.47	0.054
ncRNAs involved in STAT3 signaling in hepatocellular carcinoma	1	11	19	0.0909	1.47	0.163
Purine metabolism	1	11	94	0.0909	1.47	0.086
miRNAs involvement in the immune response in sepsis	2	32	69	0.0625	1.45	0.085
Parkinson's disease pathway	2	32	84	0.0625	1.45	0.08
DNA damage response	3	59	78	0.0508	1.38	0.091
Regulatory circuits of the STAT3 signaling pathway	3	59	79	0.0508	1.38	0.064
IL-18 signaling pathway	8	212	288	0.0377	1.36	0.152
Glycosaminoglycan degradation	1	12	45	0.0833	1.36	0.084
Metabolic pathway of LDL, HDL and TG, including diseases	1	12	34	0.0833	1.36	0.063
OSX and miRNAs in tooth development	1	12	39	0.0833	1.36	0.06
PKC-gamma calcium signaling pathway in ataxia	1	12	29	0.0833	1.36	0.089
Pyrimidine metabolism and related diseases	1	12	97	0.0833	1.36	0.081
Regulation of Wnt / B-catenin signaling by small molecule compounds	1	12	33	0.0833	1.36	0.061
Metabolic reprogramming in colon cancer	2	34	80	0.0588	1.35	0.092
Parkin-ubiquitin proteasomal system pathway	3	60	75	0.05	1.35	0.11
Lung fibrosis	2	35	85	0.0571	1.3	0.068
Mitochondrial long chain fatty acid beta-oxidation	1	13	24	0.0769	1.26	0.152
MYD88 distinct input-output pathway	1	13	20	0.0769	1.26	0.183
IL-6 signaling pathway	2	38	45	0.0526	1.18	0.083
Cancer immunotherapy by PD-1 blockade	1	14	35	0.0714	1.18	0.084
Cysteine and methionine catabolism	1	14	74	0.0714	1.18	0.164
Integrated cancer pathway	2	39	50	0.0513	1.14	0.107
Orexin receptor pathway	4	98	225	0.0408	1.12	0.214
Interactions between LOXL4 and oxidative stress pathway	1	15	19	0.0667	1.1	0.191
miRNA targets in ECM and membrane receptors	1	15	46	0.0667	1.1	0.098
Mitochondrial complex III assembly	1	15	19	0.0667	1.1	0.183
SREBF and miR33 in cholesterol and lipid homeostasis	1	15	19	0.0667	1.1	0.154
TGF-beta signaling in thyroid cells for epithelial-mesenchymal transition	1	15	20	0.0667	1.1	0.208
Aryl hydrocarbon receptor Netpath	2	42	57	0.0476	1.02	0.132
Interleukin-1 (IL-1) structural pathway	2	42	52	0.0476	1.02	0.122
Overview of nanoparticle effects	1	16	42	0.0625	1.02	0.097
PPAR-alpha pathway	1	16	28	0.0625	1.02	0.211
Pyrimidine metabolism	3	74	140	0.0405	0.96	0.394
4-hydroxytamoxifen, Dexamethasone, and Retinoic Acids Regulation of p27 Expression	1	17	31	0.0588	0.95	0.23
IL1 and megakaryocytes in obesity	1	17	26	0.0588	0.95	0.241
Methionine de novo and salvage pathway	1	17	74	0.0588	0.95	0.311
Oligodendrocyte specification and differentiation, leading to myelin components for CNS	1	17	46	0.0588	0.95	0.1
Toll-like receptor signaling pathway	3	75	117	0.04	0.93	0.408
Nuclear receptors in lipid metabolism and toxicity	1	18	48	0.0556	0.89	0.127
Purine metabolism and related disorders	1	18	139	0.0556	0.89	0.39
Urea cycle and metabolism of amino groups	1	18	71	0.0556	0.89	0.456
Small cell lung cancer	3	77	104	0.039	0.89	0.463
Hair follicle development: cytodifferentiation - part 3 of 3	2	46	93	0.0435	0.89	0.535
Vitamin D receptor pathway	4	110	188	0.0364	0.88	0.277
Integrated breast cancer pathway	5	145	200	0.0345	0.86	0.394
Physico-chemical features and toxicity-associated pathways	2	47	78	0.0426	0.85	0.627
Congenital generalized lipodystrophy (CGL)	1	19	31	0.0526	0.83	0.258
NAD metabolism in oncogene-induced senescence and mitochondrial dysfunction-associated senescence	1	19	46	0.0526	0.83	0.166
Nucleotide metabolism	1	19	37	0.0526	0.83	0.227
Statin inhibition of cholesterol production	1	19	50	0.0526	0.83	0.167
1q21.1 copy number variation syndrome	1	20	58	0.05	0.78	0.569
Nanoparticle triggered autophagic cell death	1	20	30	0.05	0.78	0.294
Vitamin D in inflammatory diseases	1	20	25	0.05	0.78	0.243
Apoptosis-related network due to altered Notch3 in ovarian cancer	2	51	54	0.0392	0.73	0.563
Purinergic signaling	1	21	96	0.0476	0.72	0.61
Kit receptor signaling pathway	2	52	60	0.0385	0.7	0.646
Ciliary landscape	6	192	215	0.0313	0.7	0.525
Endothelin pathways	1	22	48	0.0455	0.67	0.702
Ethanol effects on histone modifications	1	22	53	0.0455	0.67	0.669
Matrix metalloproteinases	1	22	31	0.0455	0.67	0.372
Wnt signaling in kidney disease	1	22	39	0.0455	0.67	0.591
7q11.23 copy number variation syndrome	3	87	149	0.0345	0.67	0.436
Male infertility	3	87	150	0.0345	0.67	0.428
Cardiac progenitor differentiation	1	23	56	0.0435	0.63	0.729
Glycosylation and related congenital defects	1	23	73	0.0435	0.63	0.63
Melanoma	2	56	78	0.0357	0.59	0.619
Nucleotide excision repair in xeroderma pigmentosum	2	56	62	0.0357	0.59	0.667
Adipogenesis	3	91	132	0.033	0.59	0.42
Effect of progerin on genes involved in Hutchinson-Gilford progeria syndrome	1	24	30	0.0417	0.58	0.712
Gastric cancer network 1	1	24	30	0.0417	0.58	0.707
TLR4 signaling and tolerance	1	24	30	0.0417	0.58	0.721
Zinc homeostasis	1	24	39	0.0417	0.58	0.938
ncRNAs involved in Wnt signaling in hepatocellular carcinoma	2	57	96	0.0351	0.57	0.627
Non-genomic actions of 1,25 dihydroxyvitamin D3	2	57	97	0.0351	0.57	0.636
Fatty acid beta-oxidation	1	25	71	0.04	0.54	0.624
Interactions of natural killer cells in pancreatic cancer	1	25	43	0.04	0.54	0.956
Phosphodiesterases in neuronal function	1	25	66	0.04	0.54	0.653
Type I collagen synthesis in the context of osteogenesis imperfecta	1	25	36	0.04	0.54	0.979
Type I interferon induction and signaling during SARS-CoV-2 infection	1	25	45	0.04	0.54	0.933
Base excision repair	1	26	32	0.0385	0.5	0.964
Photodynamic therapy-induced NF-kB survival signaling	1	26	36	0.0385	0.5	0.991
Prion disease pathway	1	26	36	0.0385	0.5	0.987
Resistin as a regulator of inflammation	1	26	34	0.0385	0.5	0.972
Sudden infant death syndrome (SIDS) susceptibility pathways	3	97	182	0.0309	0.47	0.724
Circadian rhythm genes	4	135	209	0.0296	0.46	0.603
Interactions between immune cells and microRNAs in tumor microenvironment	1	27	52	0.037	0.46	0.899
Toll-like receptor signaling related to MyD88	1	27	32	0.037	0.46	0.99
AGE/RAGE pathway	2	62	67	0.0323	0.45	0.686
BDNF-TrkB signaling	1	28	38	0.0357	0.42	0.998
Glycerophospholipid biosynthetic pathway	1	28	107	0.0357	0.42	0.605
Tumor suppressor activity of SMARCB1	1	28	35	0.0357	0.42	0.998
Amyotrophic lateral sclerosis (ALS)	1	29	56	0.0345	0.38	0.882
MAPK cascade	1	29	37	0.0345	0.38	0.999
Neovascularisation processes	1	29	42	0.0345	0.38	0.997
Complement and coagulation cascades	1	30	63	0.0333	0.35	0.806
Prostaglandin synthesis and regulation	1	30	61	0.0333	0.35	0.83
Fibrin complement receptor 3 signaling pathway	1	31	47	0.0323	0.31	0.996
Overview of leukocyte-intrinsic Hippo pathway functions	1	31	37	0.0323	0.31	0.999
Photodynamic therapy-induced HIF-1 survival signaling	1	31	38	0.0323	0.31	0.999
Apoptosis	2	69	88	0.029	0.29	0.624
Wnt signaling pathway and pluripotency	2	69	106	0.029	0.29	0.691
Glioblastoma signaling pathways	2	70	88	0.0286	0.27	0.645
FBXL10 enhancement of MAP/ERK signaling in diffuse large B-cell lymphoma	1	33	36	0.0303	0.25	0.999
Microglia pathogen phagocytosis pathway	1	33	44	0.0303	0.25	0.999
Regulation of toll-like receptor signaling pathway	3	111	153	0.027	0.23	0.84
Nephrotic syndrome	1	34	49	0.0294	0.22	0.998
Netrin-UNC5B signaling pathway	1	35	53	0.0286	0.19	0.998
Nucleotide-binding oligomerization domain (NOD) pathway	1	35	43	0.0286	0.19	0.999
Bladder cancer	1	36	47	0.0278	0.16	0.999
CCL18 signaling pathway	1	36	177	0.0278	0.16	0.768
Proximal tubule transport	1	36	86	0.0278	0.16	0.679
Cholesterol metabolism with Bloch and Kandutsch-Russell pathways	1	37	97	0.027	0.13	0.772
Prader-Willi and Angelman syndrome	1	38	90	0.0263	0.11	0.762
TNF-related weak inducer of apoptosis (TWEAK) signaling pathway	1	39	45	0.0256	0.08	0.999
Cytoplasmic ribosomal proteins	2	80	89	0.025	0.08	0.799
TNF-alpha signaling pathway	2	80	97	0.025	0.08	0.878
Nucleotide excision repair	1	40	44	0.025	0.06	0.999
TGF-beta receptor signaling	1	40	56	0.025	0.06	0.999
Thymic stromal lymphopoietin (TSLP) signaling pathway	1	41	49	0.0244	0.03	0.999
Exercise-induced circadian regulation	1	42	49	0.0238	0.01	0.999
PPAR signaling pathway	1	42	76	0.0238	0.01	0.981
ATM signaling in development and disease	1	43	49	0.0233	-0.02	0.999
Endochondral ossification with skeletal dysplasias	1	43	69	0.0233	-0.02	0.993
Endochondral ossification	1	43	69	0.0233	-0.02	0.993
Endoplasmic reticulum stress response in coronavirus infection	1	43	57	0.0233	-0.02	0.999
IL-3 signaling pathway	1	43	50	0.0233	-0.02	0.999
Pathogenic Escherichia coli infection	1	43	79	0.0233	-0.02	0.955
TGF-beta receptor signaling in skeletal dysplasias	1	43	60	0.0233	-0.02	0.999
T-cell antigen receptor (TCR) pathway during Staphylococcus aureus infection	1	44	70	0.0227	-0.04	0.983
PI3K-Akt signaling pathway	5	217	359	0.023	-0.06	0.909
Copper homeostasis	1	45	58	0.0222	-0.06	0.999
MAPK signaling pathway	4	175	258	0.0229	-0.07	0.894
Nonalcoholic fatty liver disease	3	133	170	0.0226	-0.09	0.849
Modulators of TCR signaling and T cell activation	1	47	66	0.0213	-0.11	0.977
RANKL/RANK signaling pathway	1	47	58	0.0213	-0.11	0.998
IL-1 signaling pathway	1	48	57	0.0208	-0.13	0.999
Allograft Rejection	1	49	113	0.0204	-0.15	0.924
Aripiprazole metabolic pathway	0	1	7	0	-0.16	0.93
Caffeine and theobromine metabolism	0	1	18	0	-0.16	0.999
Catalytic cycle of mammalian flavin-containing monooxygenases (FMOs)	0	1	14	0	-0.16	0.997
COVID-19, thrombosis and anticoagulation	0	1	27	0	-0.16	0.999
Diclofenac metabolic pathway	0	1	12	0	-0.16	0.997
Downregulation of ACE2 expression by SARS-CoV infection and SARS-CoV spike protein	0	1	8	0	-0.16	0.955
Evolocumab mechanism to reduce LDL cholesterol	0	1	5	0	-0.16	0.789
FABP4 in ovarian cancer	0	1	3	0	-0.16	0.479
Glucose homeostasis	0	1	24	0	-0.16	0.999
Hormonal control of pubertal growth spurt	0	1	8	0	-0.16	0.939
Influenza A virus infection	0	1	16	0	-0.16	0.998
Model for regulation of MSMP expression in cancer cells and its proangiogenic role in ovarian tumors	0	1	6	0	-0.16	0.872
Neurotransmitter disorders	0	1	27	0	-0.16	0.999
Nicotine metabolism in liver cells	0	1	18	0	-0.16	0.999
PCSK9-mediated LDL receptor degradation	0	1	3	0	-0.16	0.455
Soluble ACE2-mediated cell entry of SARS-CoV-2	0	1	7	0	-0.16	0.929
Novel intracellular components of RIG-I-like receptor (RLR) pathway	1	50	64	0.02	-0.17	0.965
Gastrin signaling pathway	2	96	115	0.0208	-0.18	0.926
DNA IR-double strand breaks and cellular response via ATM	1	52	65	0.0192	-0.21	0.932
Amino acid metabolism pathway excerpt: histidine catabolism extension	0	2	23	0	-0.22	0.999
Biosynthesis and regeneration of tetrahydrobiopterin and catabolism of phenylalanine	0	2	38	0	-0.22	0.999
Butyrate-induced histone acetylation	0	2	11	0	-0.22	0.965
Fatty acid omega-oxidation	0	2	20	0	-0.22	0.999
Gastric acid production	0	2	22	0	-0.22	0.999
Heroin metabolism	0	2	8	0	-0.22	0.824
HIPK2 in kidney fibrosis	0	2	8	0	-0.22	0.818
Hypoxia-mediated EMT and stemness	0	2	6	0	-0.22	0.656
MED and pseudoachondroplasia genes	0	2	7	0	-0.22	0.77
Mevalonate arm of cholesterol biosynthesis pathway with inhibitors	0	2	64	0	-0.22	0.936
MicroRNA network associated with chronic lymphocytic leukemia	0	2	10	0	-0.22	0.92
Nicotine effect on chromaffin cells	0	2	10	0	-0.22	0.931
Polyol pathway	0	2	17	0	-0.22	0.998
Secretion of hydrochloric acid in parietal cells	0	2	15	0	-0.22	0.993
Tamoxifen metabolism	0	2	37	0	-0.22	0.999
Thyroxine (thyroid hormone) production	0	2	12	0	-0.22	0.971
Ectoderm differentiation	2	100	145	0.02	-0.24	0.902
Arylamine metabolism	0	3	13	0	-0.27	0.926
Control of immune tolerance by vasoactive intestinal peptide	0	3	16	0	-0.27	0.981
Conversion of angiotensinogen to angiotensin II	0	3	9	0	-0.27	0.73
Direct reversal repair	0	3	4	0	-0.27	0.097
Eicosanoid metabolism via cytochrome P450 monooxygenases (CYP) pathway	0	3	23	0	-0.27	0.998
eIF5A regulation in response to inhibition of the nuclear export system	0	3	6	0	-0.27	0.322
Ethylmalonic encephalopathy	0	3	20	0	-0.27	0.995
Glycine metabolism	0	3	19	0	-0.27	0.997
Hypothetical craniofacial development pathway	0	3	11	0	-0.27	0.855
Kinin-Kallikrein pathway	0	3	10	0	-0.27	0.799
Oxytocin signaling	0	3	10	0	-0.27	0.788
SARS-CoV-2 altering angiogenesis via NRP1	0	3	11	0	-0.27	0.85
SARS-CoV-2 and angiotensin-converting enzyme 2 receptor: molecular mechanisms	0	3	14	0	-0.27	0.954
Serotonin receptor 2 and STAT3 signaling	0	3	6	0	-0.27	0.338
Somitogenesis in the context of spondylocostal dysostosis	0	3	10	0	-0.27	0.793
Vitamins A and D - action mechanisms	0	3	14	0	-0.27	0.959
Vitamin B6-dependent and responsive disorders	0	3	29	0	-0.27	0.999
22q11.2 copy number variation syndrome	2	102	225	0.0196	-0.27	0.842
Pathways affected in adenoid cystic carcinoma	1	56	72	0.0179	-0.29	0.732
AMP-activated protein kinase (AMPK) signaling	1	57	78	0.0175	-0.31	0.66
Thyroid stimulating hormone (TSH) signaling pathway	1	57	67	0.0175	-0.31	0.809
Aflatoxin B1 metabolism	0	4	16	0	-0.31	0.939
GABA metabolism (aka GHB)	0	4	42	0	-0.31	0.999
Ketone bodies synthesis and degradation	0	4	13	0	-0.31	0.843
let-7 inhibition of ES cell reprogramming	0	4	17	0	-0.31	0.971
Linoleic acid metabolism affected by coronavirus infection	0	4	28	0	-0.31	0.999
Metabolism of alpha-linolenic acid	0	4	27	0	-0.31	0.999
miR-222 in exercise-induced cardiac growth	0	4	5	0	-0.31	0.089
Peroxiredoxin 2 induced ovarian failure	0	4	13	0	-0.31	0.837
Peroxisomal beta-oxidation of tetracosanoyl-CoA	0	4	17	0	-0.31	0.962
Robo4 and VEGF signaling pathways crosstalk	0	4	7	0	-0.31	0.259
SCFA and skeletal muscle substrate metabolism	0	4	17	0	-0.31	0.957
Somatic sex determination	0	4	15	0	-0.31	0.908
Tgif disruption of Shh signaling	0	4	10	0	-0.31	0.603
DNA repair pathways, full network	2	106	125	0.0189	-0.33	0.826
Primary focal segmental glomerulosclerosis (FSGS)	1	59	77	0.0169	-0.34	0.668
Proteasome degradation	1	59	67	0.0169	-0.34	0.774
Epithelial to mesenchymal transition in colorectal cancer	2	107	163	0.0187	-0.34	0.738
Arachidonate epoxygenase / epoxide hydrolase	0	5	18	0	-0.35	0.937
Benzo(a)pyrene metabolism	0	5	17	0	-0.35	0.909
Biogenic amine synthesis	0	5	33	0	-0.35	0.999
Caloric restriction and aging	0	5	13	0	-0.35	0.661
Cell-type dependent selectivity of CCK2R signaling	0	5	26	0	-0.35	0.995
Cholesterol biosynthesis with skeletal dysplasias	0	5	23	0	-0.35	0.989
Codeine and morphine metabolism	0	5	25	0	-0.35	0.995
Drug induction of bile acid pathway	0	5	45	0	-0.35	0.998
Effects of nitric oxide	0	5	16	0	-0.35	0.867
Farnesoid X receptor pathway	0	5	21	0	-0.35	0.97
Fluoroacetic acid toxicity	0	5	16	0	-0.35	0.857
Folate-alcohol and cancer pathway hypotheses	0	5	24	0	-0.35	0.994
FTO obesity variant mechanism	0	5	11	0	-0.35	0.478
Glial cell differentiation	0	5	9	0	-0.35	0.264
GPCRs, class C metabotropic glutamate, pheromone	0	5	15	0	-0.35	0.803
Irinotecan pathway	0	5	18	0	-0.35	0.938
Lamin A-processing pathway	0	5	8	0	-0.35	0.191
Methylation pathways	0	5	15	0	-0.35	0.819
mir-124 predicted interactions with cell cycle and differentiation	0	5	8	0	-0.35	0.19
Osteoblast signaling	0	5	18	0	-0.35	0.934
PTF1A related regulatory pathway	0	5	12	0	-0.35	0.597
Steroid biosynthesis	0	5	25	0	-0.35	0.999
TCA cycle nutrient use and invasiveness of ovarian cancer	0	5	11	0	-0.35	0.49
Oncostatin M signaling pathway	1	60	66	0.0167	-0.36	0.78
Breast cancer pathway	2	110	167	0.0182	-0.38	0.734
Acetylcholine synthesis	0	6	18	0	-0.38	0.838
Alternative pathway of fetal androgen synthesis	0	6	48	0	-0.38	0.985
ATR signaling	0	6	10	0	-0.38	0.217
Bile acids synthesis and enterohepatic circulation	0	6	18	0	-0.38	0.84
Biomarkers for urea cycle disorders	0	6	51	0	-0.38	0.985
BMP2-WNT4-FOXO1 pathway in primary endometrial stromal cell differentiation	0	6	16	0	-0.38	0.753
Degradation pathway of sphingolipids, including diseases	0	6	41	0	-0.38	0.998
exRNA mechanism of action and biogenesis	0	6	8	0	-0.38	0.118
Gene regulatory network modelling somitogenesis	0	6	13	0	-0.38	0.487
Glucuronidation	0	6	41	0	-0.38	0.999
Heme biosynthesis	0	6	28	0	-0.38	0.994
Insulin signaling in adipocytes (diabetic condition)	0	6	12	0	-0.38	0.419
Insulin signaling in adipocytes (normal condition)	0	6	15	0	-0.38	0.649
Krebs cycle disorders	0	6	34	0	-0.38	0.999
Lipid particles composition	0	6	21	0	-0.38	0.946
Liver X receptor pathway	0	6	12	0	-0.38	0.375
Metastatic brain tumor	0	6	28	0	-0.38	0.998
MicroRNA for targeting cancer growth and vascularization in glioblastoma	0	6	10	0	-0.38	0.211
miRNA biogenesis	0	6	7	0	-0.38	0.085
Mitochondrial fatty acid synthesis pathway	0	6	21	0	-0.38	0.941
Molybdenum cofactor (Moco) biosynthesis	0	6	21	0	-0.38	0.945
Phase I biotransformations, non P450	0	6	13	0	-0.38	0.497
Pilocytic astrocytoma	0	6	14	0	-0.38	0.54
SARS-CoV-2 B.1.1.7 variant antagonises innate immune activation	0	6	15	0	-0.38	0.666
Serotonin transporter activity	0	6	15	0	-0.38	0.678
Somatroph axis (GH) and its relationship to dietary restriction and aging	0	6	12	0	-0.38	0.388
Non-small cell lung cancer	1	62	88	0.0161	-0.39	0.638
3q29 copy number variation syndrome	1	63	115	0.0159	-0.41	0.657
Histone modifications	1	63	68	0.0159	-0.41	0.729
lncRNA in canonical Wnt signaling and colorectal cancer	1	63	102	0.0159	-0.41	0.625
15q11.2 copy number variation syndrome	0	7	13	0	-0.41	0.322
ACE inhibitor pathway	0	7	29	0	-0.41	0.993
Activation of NLRP3 inflammasome by SARS-CoV-2	0	7	10	0	-0.41	0.164
Altered glycosylation of MUC1 in tumor microenvironment	0	7	10	0	-0.41	0.127
Cellular proteostasis	0	7	15	0	-0.41	0.469
Cerebral organic acidurias, including diseases	0	7	46	0	-0.41	0.986
DDX1 as a regulatory component of the Drosha microprocessor	0	7	8	0	-0.41	0.096
EDA signaling in hair follicle development	0	7	15	0	-0.41	0.489
EV release from cardiac cells and their functional effects	0	7	17	0	-0.41	0.652
Interleukin-1 induced activation of NF-kB	0	7	13	0	-0.41	0.344
SARS-CoV-2 and COVID-19 pathway	0	7	70	0	-0.41	0.683
Type III interferon signaling	0	7	11	0	-0.41	0.18
Valproic acid pathway	0	7	36	0	-0.41	0.997
Vitamin D metabolism	0	7	22	0	-0.41	0.908
Acquired partial lipodystrophy / Barraquer-Simons syndrome	0	8	17	0	-0.44	0.524
Alanine and aspartate metabolism	0	8	66	0	-0.44	0.719
ApoE and miR-146 in inflammation and atherosclerosis	0	8	13	0	-0.44	0.247
Bone morphogenic protein (BMP) signaling and regulation	0	8	13	0	-0.44	0.195
Canonical NF-kB pathway	0	8	9	0	-0.44	0.103
Classical pathway of steroidogenesis with glucocorticoid and mineralocorticoid metabolism	0	8	73	0	-0.44	0.644
Dual hijack model of Vif in HIV infection	0	8	10	0	-0.44	0.109
Ethanol metabolism production of ROS by CYP2E1	0	8	28	0	-0.44	0.974
Hijack of ubiquitination by SARS-CoV-2	0	8	12	0	-0.44	0.176
IL-10 anti-inflammatory signaling pathway	0	8	19	0	-0.44	0.642
Ketogenesis and ketolysis	0	8	27	0	-0.44	0.97
Macrophage markers	0	8	10	0	-0.44	0.117
Mammary gland development pathway - Involution (Stage 4 of 4)	0	8	13	0	-0.44	0.228
MFAP5-mediated ovarian cancer cell motility and invasiveness	0	8	18	0	-0.44	0.569
Mitochondrial complex II assembly	0	8	10	0	-0.44	0.103
NAD biosynthesis II (from tryptophan)	0	8	34	0	-0.44	0.996
Nanomaterial-induced inflammasome activation	0	8	13	0	-0.44	0.221
Nicotine effect on dopaminergic neurons	0	8	31	0	-0.44	0.986
NIPBL role in DNA damage - Cornelia de Lange syndrome	0	8	9	0	-0.44	0.088
Non-homologous end joining	0	8	11	0	-0.44	0.142
Omega-9 fatty acid synthesis	0	8	44	0	-0.44	0.988
Serotonin and anxiety-related events	0	8	16	0	-0.44	0.413
Transcription factors regulate miRNAs related to cardiac hypertrophy	0	8	16	0	-0.44	0.404
T-cell receptor (TCR) signaling pathway	1	65	93	0.0154	-0.44	0.644
Aerobic glycolysis	0	9	35	0	-0.47	0.993
Biotin metabolism, including IEMs	0	9	38	0	-0.47	0.997
Cytokines and inflammatory response	0	9	32	0	-0.47	0.973
Estrogen receptor pathway	0	9	16	0	-0.47	0.303
Familial hyperlipidemia type 2	0	9	36	0	-0.47	0.996
Familial hyperlipidemia type 3	0	9	24	0	-0.47	0.827
Familial hyperlipidemia type 5	0	9	28	0	-0.47	0.945
GDNF/RET signaling axis	0	9	24	0	-0.47	0.811
Genes targeted by miRNAs in adipocytes	0	9	19	0	-0.47	0.496
Inclusion body myositis	0	9	27	0	-0.47	0.932
lncRNA-mediated mechanisms of therapeutic resistance	0	9	14	0	-0.47	0.197
Major receptors targeted by epinephrine and norepinephrine	0	9	34	0	-0.47	0.992
Mammary gland development pathway - Embryonic development (Stage 1 of 4)	0	9	21	0	-0.47	0.647
Methionine metabolism leading to sulfur amino acids and related disorders	0	9	46	0	-0.47	0.966
Nod-like receptor (NLR) signaling pathway	0	9	11	0	-0.47	0.11
Nucleotide GPCRs	0	9	15	0	-0.47	0.234
SRF and miRs in smooth muscle differentiation and proliferation	0	9	18	0	-0.47	0.445
TCA cycle in senescence	0	9	30	0	-0.47	0.97
Thiamine metabolic pathways	0	9	34	0	-0.47	0.992
Vitamin B12 disorders	0	9	36	0	-0.47	0.998
Corticotropin-releasing hormone signaling pathway	1	68	98	0.0147	-0.49	0.628
Leptin signaling pathway	1	68	77	0.0147	-0.49	0.614
Thyroid hormones production and peripheral downstream signaling effects	1	68	134	0.0147	-0.49	0.511
Autosomal recessive osteopetrosis pathways	0	10	14	0	-0.49	0.169
Cancer immunotherapy by CTLA4 blockade	0	10	21	0	-0.49	0.501
Differentiation of white and brown adipocyte	0	10	26	0	-0.49	0.827
Dopaminergic neurogenesis	0	10	32	0	-0.49	0.958
Familial hyperlipidemia type 1	0	10	35	0	-0.49	0.991
Mammalian disorder of sexual development	0	10	29	0	-0.49	0.902
MAPK and NFkB signaling pathways inhibited by Yersinia YopJ	0	10	13	0	-0.49	0.134
NAD metabolism, sirtuins and aging	0	10	16	0	-0.49	0.228
SMC1/SMC3 role in DNA damage - Cornelia de Lange Syndrome	0	10	12	0	-0.49	0.141
Trans-sulfuration pathway	0	10	25	0	-0.49	0.75
Embryonic stem cell pluripotency pathways	1	69	123	0.0145	-0.5	0.562
Aspirin and miRNAs	0	11	24	0	-0.52	0.589
Cell differentiation - index	0	11	61	0	-0.52	0.679
Complement activation	0	11	24	0	-0.52	0.605
Deregulation of Rab and Rab effector genes in bladder cancer	0	11	17	0	-0.52	0.207
Development of pulmonary dendritic cells and macrophage subsets	0	11	14	0	-0.52	0.172
ERK pathway in Huntington's disease	0	11	17	0	-0.52	0.19
Fatty acid transporters	0	11	28	0	-0.52	0.789
Genes associated with the development of rheumatoid arthritis	0	11	22	0	-0.52	0.449
GPR40 pathway	0	11	20	0	-0.52	0.336
Hedgehog signaling pathway Netpath	0	11	17	0	-0.52	0.19
Leptin-insulin signaling overlap	0	11	20	0	-0.52	0.333
Nitric oxide metabolism in cystic fibrosis	0	11	25	0	-0.52	0.656
Omega-3 / omega-6 fatty acid synthesis	0	11	53	0	-0.52	0.845
Osteoclast signaling	0	11	21	0	-0.52	0.41
RalA downstream regulated genes	0	11	13	0	-0.52	0.14
Serotonin and anxiety	0	11	22	0	-0.52	0.462
Small ligand GPCRs	0	11	25	0	-0.52	0.66
Transcriptional cascade regulating adipogenesis	0	11	14	0	-0.52	0.138
Osteoblast differentiation and related diseases	1	70	119	0.0143	-0.52	0.579
EGFR tyrosine kinase inhibitor resistance	1	71	92	0.0141	-0.53	0.626
Airway smooth muscle cell contraction	0	12	25	0	-0.54	0.516
Canonical and non-canonical TGF-B signaling	0	12	18	0	-0.54	0.214
Development and heterogeneity of the ILC family	0	12	33	0	-0.54	0.887
Familial hyperlipidemia type 4	0	12	36	0	-0.54	0.949
FOXA2 pathway	0	12	23	0	-0.54	0.387
GABA receptor signaling	0	12	57	0	-0.54	0.751
Ganglio sphingolipid metabolism	0	12	56	0	-0.54	0.748
Globo sphingolipid metabolism	0	12	28	0	-0.54	0.701
GPCRs, class B secretin-like	0	12	24	0	-0.54	0.463
H19 action Rb-E2F1 signaling and CDK-Beta-catenin activity	0	12	17	0	-0.54	0.182
Homologous recombination	0	12	14	0	-0.54	0.159
Kennedy pathway from sphingolipids	0	12	35	0	-0.54	0.929
Mammary gland development pathway - Puberty (Stage 2 of 4)	0	12	15	0	-0.54	0.165
Mevalonate arm of cholesterol biosynthesis pathway	0	12	55	0	-0.54	0.771
Nanoparticle triggered regulated necrosis	0	12	26	0	-0.54	0.594
Amplification and expansion of oncogenic pathways as metastatic traits	0	13	18	0	-0.56	0.201
BMP signaling in eyelid development	0	13	23	0	-0.56	0.354
Cholesterol biosynthesis pathway	0	13	32	0	-0.56	0.793
Extracellular vesicles in the crosstalk of cardiac cells	0	13	30	0	-0.56	0.712
Galanin receptor pathway	0	13	22	0	-0.56	0.274
MAP3K1 role in promoting and blocking gonadal determination	0	13	18	0	-0.56	0.198
MAPK pathway in congenital thyroid cancer	0	13	19	0	-0.56	0.217
miR-509-3p alteration of YAP1/ECM axis	0	13	19	0	-0.56	0.212
Monoamine GPCRs	0	13	43	0	-0.56	0.956
NAD+ metabolism	0	13	34	0	-0.56	0.858
Neuroinflammation	0	13	31	0	-0.56	0.752
Osteopontin signaling	0	13	14	0	-0.56	0.15
TCA cycle and deficiency of pyruvate dehydrogenase complex (PDHc)	0	13	37	0	-0.56	0.927
MicroRNAs in cardiomyocyte hypertrophy	1	73	109	0.0137	-0.56	0.594
Cell differentiation - expanded index	0	14	69	0	-0.58	0.639
Constitutive androstane receptor pathway	0	14	34	0	-0.58	0.773
Kallmann syndrome	0	14	40	0	-0.58	0.907
Mitochondrial gene expression	0	14	23	0	-0.58	0.26
Regulation of sister chromatid separation at the metaphase-anaphase transition	0	14	16	0	-0.58	0.165
Riboflavin and CoQ disorders	0	14	59	0	-0.58	0.679
Apoptosis modulation by HSP70	0	15	22	0	-0.6	0.229
Imatinib and chronic myeloid leukemia	0	15	25	0	-0.6	0.315
Metabolism of spingolipids in ER and Golgi apparatus	0	15	72	0	-0.6	0.654
MFAP5 effect on permeability and motility of endothelial cells via cytoskeleton rearrangement	0	15	20	0	-0.6	0.203
nsp1 from SARS-CoV-2 inhibits translation initiation in the host cell	0	15	21	0	-0.6	0.221
SARS coronavirus and innate immunity	0	15	33	0	-0.6	0.665
Serotonin receptor 4/6/7 and NR3C signaling	0	15	22	0	-0.6	0.242
Transcription factor regulation in adipogenesis	0	15	24	0	-0.6	0.266
Type II diabetes mellitus	0	15	28	0	-0.6	0.42
Eicosanoid synthesis	0	16	57	0	-0.62	0.706
Hypertrophy model	0	16	21	0	-0.62	0.215
IL-9 signaling pathway	0	16	18	0	-0.62	0.164
Inflammatory response pathway	0	16	34	0	-0.62	0.616
Interactome of polycomb repressive complex 2 (PRC2)	0	16	17	0	-0.62	0.167
Kynurenine pathway and links to cell senescence	0	16	56	0	-0.62	0.744
Nanomaterial induced apoptosis	0	16	31	0	-0.62	0.455
Ovarian infertility	0	16	33	0	-0.62	0.564
Overview of interferons-mediated signaling pathway	0	16	38	0	-0.62	0.784
Pathways of nucleic acid metabolism and innate immune sensing	0	16	39	0	-0.62	0.796
PI3K/AKT/mTOR - VitD3 signaling	0	16	34	0	-0.62	0.6
Pregnane X receptor pathway	0	16	35	0	-0.62	0.656
Serotonin receptor 2 and ELK-SRF/GATA4 signaling	0	16	24	0	-0.62	0.246
TP53 network	0	16	23	0	-0.62	0.23
Apoptosis modulation and signaling	1	78	97	0.0128	-0.63	0.612
Pancreatic adenocarcinoma pathway	1	78	97	0.0128	-0.63	0.61
Wnt signaling	1	78	121	0.0128	-0.63	0.478
Angiogenesis	0	17	25	0	-0.64	0.244
Eicosanoid metabolism via cyclooxygenases (COX)	0	17	70	0	-0.64	0.652
Eicosanoid metabolism via lipooxygenases (LOX)	0	17	70	0	-0.64	0.638
Proteoglycan biosynthesis	0	17	36	0	-0.64	0.615
RAS and bradykinin pathways in COVID-19	0	17	51	0	-0.64	0.753
TCA cycle (aka Krebs or citric acid cycle)	0	17	49	0	-0.64	0.782
Transcription co-factors SKI and SKIL protein partners	0	17	19	0	-0.64	0.225
Triacylglyceride synthesis	0	17	37	0	-0.64	0.644
Fatty acid biosynthesis	0	18	43	0	-0.66	0.753
Hypothesized pathways in pathogenesis of cardiovascular disease	0	18	27	0	-0.66	0.274
Inhibition of exosome biogenesis and secretion by Manumycin A in CRPC cells	0	18	19	0	-0.66	0.202
mBDNF and proBDNF regulation of GABA neurotransmission	0	18	40	0	-0.66	0.633
Selective expression of chemokine receptors during T-cell polarization	0	18	30	0	-0.66	0.3
Urea cycle and associated pathways	0	18	81	0	-0.66	0.654
Vitamin A and carotenoid metabolism	0	18	65	0	-0.66	0.641
Wnt/beta-catenin signaling pathway in leukemia	0	18	29	0	-0.66	0.292
15q13.3 copy number variation syndrome	0	19	40	0	-0.68	0.521
Angiotensin II receptor type 1 pathway	0	19	37	0	-0.68	0.459
Disruption of postsynaptic signaling by CNV	0	19	35	0	-0.68	0.423
Hematopoietic stem cell gene regulation by GABP alpha/beta complex	0	19	26	0	-0.68	0.261
STING pathway in Kawasaki-like disease and COVID-19	0	19	26	0	-0.68	0.259
Hippo-Merlin signaling dysregulation	1	82	121	0.0122	-0.69	0.452
Metapathway biotransformation Phase I and II	1	82	191	0.0122	-0.69	0.54
7-oxo-C and 7-beta-HC pathways	0	20	60	0	-0.7	0.658
Estrogen signaling pathway	0	20	26	0	-0.7	0.261
Hippo-Yap signaling pathway	0	20	24	0	-0.7	0.228
Host-pathogen interaction of human coronaviruses - apoptosis	0	20	34	0	-0.7	0.316
Host-pathogen interaction of human coronaviruses - autophagy	0	20	23	0	-0.7	0.227
Intracellular trafficking proteins involved in CMT neuropathy	0	20	28	0	-0.7	0.266
miRNA regulation of p53 pathway in prostate cancer	0	20	37	0	-0.7	0.418
MTHFR deficiency	0	20	60	0	-0.7	0.674
NAD+ biosynthetic pathways	0	20	37	0	-0.7	0.42
Progeria-associated lipodystrophy	0	20	36	0	-0.7	0.363
Regulation of apoptosis by parathyroid hormone-related protein	0	20	24	0	-0.7	0.249
T cell receptor and co-stimulatory signaling	0	20	45	0	-0.7	0.571
Androgen receptor signaling pathway	1	83	90	0.012	-0.7	0.609
Thermogenesis	1	83	140	0.012	-0.7	0.416
Cannabinoid receptor signaling	0	21	54	0	-0.71	0.597
Genes controlling nephrogenesis	0	21	45	0	-0.71	0.515
Glycerolipids and glycerophospholipids	0	21	52	0	-0.71	0.62
Monoamine transport	0	21	47	0	-0.71	0.558
Physiological and pathological hypertrophy of the heart	0	21	27	0	-0.71	0.272
S1P receptor signal transduction	0	21	26	0	-0.71	0.254
Sphingolipid metabolism overview	0	21	55	0	-0.71	0.607
Striated muscle contraction pathway	0	21	39	0	-0.71	0.436
Cell migration and invasion through p75NTR	0	22	31	0	-0.73	0.294
Heart development	0	22	48	0	-0.73	0.447
Immune response to tuberculosis	0	22	24	0	-0.73	0.24
Sphingolipid metabolism: integrated pathway	0	22	97	0	-0.73	0.607
16p11.2 distal deletion syndrome	0	23	46	0	-0.75	0.374
Canonical and non-canonical Notch signaling	0	23	31	0	-0.75	0.294
Common pathways underlying drug addiction	0	23	50	0	-0.75	0.449
Development of ureteric collection system	0	23	63	0	-0.75	0.623
EPO receptor signaling	0	23	27	0	-0.75	0.253
FGFR3 signaling in chondrocyte proliferation and terminal differentiation	0	23	29	0	-0.75	0.257
Follicle stimulating hormone (FSH) signaling pathway	0	23	28	0	-0.75	0.283
IL-7 signaling pathway	0	23	26	0	-0.75	0.242
Mammary gland development pathway - Pregnancy and lactation (Stage 3 of 4)	0	23	42	0	-0.75	0.298
Oxidation by cytochrome P450	0	23	75	0	-0.75	0.633
Prostaglandin and leukotriene metabolism in senescence	0	23	57	0	-0.75	0.55
Relationship between inflammation, COX-2 and EGFR	0	23	29	0	-0.75	0.28
Unfolded protein response	0	23	28	0	-0.75	0.248
Extracellular vesicle-mediated signaling in recipient cells	0	24	31	0	-0.76	0.289
IL-17 signaling pathway	0	24	33	0	-0.76	0.293
Intraflagellar transport proteins binding to dynein	0	24	28	0	-0.76	0.272
Lipid metabolism pathway	0	24	43	0	-0.76	0.303
Melatonin metabolism and effects	0	24	64	0	-0.76	0.593
Mitochondrial immune response to SARS-CoV-2	0	24	62	0	-0.76	0.591
Nuclear receptors	0	24	44	0	-0.76	0.287
Tryptophan metabolism	0	24	140	0	-0.76	0.42
White fat cell differentiation	0	24	35	0	-0.76	0.291
Genes related to primary cilium development (based on CRISPR)	1	89	104	0.0112	-0.78	0.534
Autophagy	0	25	33	0	-0.78	0.288
Photodynamic therapy-induced unfolded protein response	0	25	28	0	-0.78	0.287
Regucalcin in proximal tubule epithelial kidney cells	0	25	68	0	-0.78	0.621
Sphingolipid metabolism in senescence	0	25	49	0	-0.78	0.291
Nanoparticle-mediated activation of receptor signaling	0	26	36	0	-0.8	0.267
Signal transduction through IL1R	0	26	34	0	-0.8	0.29
Type II interferon signaling (IFNG)	0	26	38	0	-0.8	0.242
Fragile X syndrome	1	91	133	0.011	-0.8	0.428
CAMKK2 pathway	0	27	143	0	-0.81	0.41
Kisspeptin/kisspeptin receptor system in the ovary	0	27	49	0	-0.81	0.194
Neural crest cell migration during development	0	27	40	0	-0.81	0.232
Peptide GPCRs	0	27	79	0	-0.81	0.609
Sphingolipid pathway	0	27	63	0	-0.81	0.492
Alpha 6 beta 4 signaling pathway	0	28	34	0	-0.83	0.299
Familial partial lipodystrophy (FPLD)	0	28	44	0	-0.83	0.179
NO/cGMP/PKG mediated neuroprotection	0	28	65	0	-0.83	0.494
Oxysterols derived from cholesterol	0	28	112	0	-0.83	0.454
Renin-angiotensin-aldosterone system (RAAS)	0	28	57	0	-0.83	0.317
Hepatocyte growth factor receptor signaling	0	29	35	0	-0.84	0.226
Initiation of transcription and translation elongation at the HIV-1 LTR	0	29	35	0	-0.84	0.234
p38 MAPK signaling pathway	0	29	36	0	-0.84	0.269
PI3K-AKT-mTOR signaling pathway and therapeutic opportunities	0	29	33	0	-0.84	0.264
Neuroinflammation and glutamatergic signaling	1	95	178	0.0105	-0.85	0.293
Factors and pathways affecting insulin-like growth factor (IGF1)-Akt signaling	0	30	43	0	-0.85	0.155
G13 signaling pathway	0	30	39	0	-0.85	0.205
Host-pathogen interaction of human coronaviruses - interferon induction	0	30	47	0	-0.85	0.134
Neural crest cell migration in cancer	0	30	43	0	-0.85	0.16
Oxidative damage response	0	30	44	0	-0.85	0.144
Type 2 papillary renal cell carcinoma	0	30	41	0	-0.85	0.172
Calcium regulation in cardiac cells	1	96	167	0.0104	-0.86	0.332
Pre-implantation embryo	0	31	60	0	-0.87	0.249
Splicing factor NOVA regulated synaptic proteins	0	31	44	0	-0.87	0.155
Synaptic vesicle pathway	0	31	59	0	-0.87	0.207
GPCRs, class A rhodopsin-like	1	97	272	0.0103	-0.87	0.392
Mesodermal commitment pathway	1	97	154	0.0103	-0.87	0.385
Focal adhesion: PI3K-Akt-mTOR-signaling pathway	3	206	305	0.0146	-0.87	0.356
Alzheimer's disease	3	207	288	0.0145	-0.88	0.369
Glycogen synthesis and degradation	0	32	54	0	-0.88	0.145
Hedgehog signaling pathway	0	32	44	0	-0.88	0.139
Influence of laminopathies on Wnt signaling	0	32	45	0	-0.88	0.129
Mitochondrial complex IV assembly	0	32	40	0	-0.88	0.196
Alzheimer's disease and miRNA effects	3	208	358	0.0144	-0.89	0.424
Glycolysis and gluconeogenesis	0	33	69	0	-0.9	0.38
Host-pathogen interaction of human coronaviruses - MAPK signaling	0	33	43	0	-0.9	0.125
Mechanoregulation and pathology of YAP/TAZ via Hippo and non-Hippo mechanisms	0	34	47	0	-0.91	0.088
Eukaryotic transcription initiation	0	35	42	0	-0.92	0.154
IL-5 signaling pathway	0	35	41	0	-0.92	0.15
PDGF pathway	0	35	53	0	-0.92	0.125
Target of rapamycin (TOR) signaling	0	35	40	0	-0.92	0.143
Notch signaling	0	36	48	0	-0.94	0.101
Rett syndrome causing genes	0	36	60	0	-0.94	0.174
Regulation of actin cytoskeleton	1	103	160	0.0097	-0.94	0.293
Envelope proteins and their potential roles in EDMD physiopathology	0	37	47	0	-0.95	0.112
Fas ligand pathway and stress induction of heat shock proteins	0	37	48	0	-0.95	0.119
IL-2 signaling pathway	0	38	43	0	-0.96	0.112
Interleukin-11 signaling pathway	0	39	45	0	-0.97	0.102
Microtubule cytoskeleton regulation	0	39	47	0	-0.97	0.095
Phosphoinositides metabolism	0	39	89	0	-0.97	0.447
Brain-derived neurotrophic factor (BDNF) signaling pathway	1	107	150	0.0093	-0.98	0.364
Myometrial relaxation and contraction pathways	1	107	161	0.0093	-0.98	0.317
Neurodegeneration with brain iron accumulation (NBIA) subtypes pathway	0	41	77	0	-1	0.246
Energy metabolism	0	42	49	0	-1.01	0.125
Translation inhibitors in chronically activated PDGFRA cells	0	42	49	0	-1.01	0.098
Angiopoietin-like protein 8 regulatory pathway	1	110	157	0.0091	-1.01	0.304
Arrhythmogenic right ventricular cardiomyopathy	0	44	81	0	-1.04	0.21
Cardiac hypertrophic response	0	44	61	0	-1.04	0.145
Synaptic signaling pathways associated with autism spectrum disorder	0	44	55	0	-1.04	0.122
Wnt signaling pathway	0	45	52	0	-1.05	0.112
Overlap between signal transduction pathways contributing to LMNA laminopathies	0	48	73	0	-1.08	0.176
Hepatitis B infection	1	117	155	0.0085	-1.08	0.309
mRNA processing	1	117	130	0.0085	-1.08	0.419
GPCRs, other	0	49	114	0	-1.09	0.346
IL-4 signaling pathway	0	49	55	0	-1.09	0.111
MECP2 and associated Rett syndrome	0	49	114	0	-1.09	0.345
Notch signaling pathway (Netpath)	0	49	62	0	-1.09	0.141
Translation factors	0	49	51	0	-1.09	0.117
Interferon type I signaling pathways	0	50	57	0	-1.1	0.124
Genotoxicity pathway	0	52	65	0	-1.13	0.14
Mitochondrial complex I assembly model OXPHOS system	0	53	61	0	-1.14	0.152
Cytosolic DNA-sensing pathway	0	54	77	0	-1.15	0.151
Endometrial cancer	0	54	77	0	-1.15	0.158
Chemokine signaling pathway	1	127	172	0.0079	-1.18	0.251
RAC1/PAK1/p38/MMP2 pathway	0	59	74	0	-1.2	0.145
Oxidative phosphorylation	0	61	68	0	-1.22	0.164
T-cell activation SARS-CoV-2	0	61	98	0	-1.22	0.101
Complement system	0	62	143	0	-1.23	0.251
16p11.2 proximal deletion syndrome	0	63	152	0	-1.24	0.271
Chromosomal and microsatellite instability in colorectal cancer	0	63	81	0	-1.24	0.135
Joubert syndrome	0	63	87	0	-1.24	0.107
Sterol regulatory element-binding proteins (SREBP) signaling	0	63	77	0	-1.24	0.102
Insulin signaling	1	134	162	0.0075	-1.24	0.247
Head and neck squamous cell carcinoma	0	65	81	0	-1.26	0.131
Clear cell renal cell carcinoma pathways	0	66	92	0	-1.27	0.107
G protein signaling pathways	0	66	97	0	-1.27	0.114
Prolactin signaling pathway	0	67	79	0	-1.28	0.113
Hippo signaling regulation pathways	0	68	104	0	-1.29	0.117
Amino acid metabolism	0	69	205	0	-1.3	0.197
Acute viral myocarditis	0	70	110	0	-1.31	0.127
Complement system in neuronal development and plasticity	0	73	137	0	-1.34	0.095
ErbB signaling pathway	0	75	101	0	-1.35	0.101
B cell receptor signaling pathway	0	79	99	0	-1.39	0.098
Focal adhesion	1	152	201	0.0066	-1.4	0.193
Integrin-mediated cell adhesion	0	82	102	0	-1.42	0.104
DNA damage response (only ATM dependent)	0	91	118	0	-1.49	0.093
Electron transport chain: OXPHOS system in mitochondria	0	98	119	0	-1.55	0.075
Endoderm differentiation	0	101	147	0	-1.57	0.081
TGF-beta signaling pathway	0	113	133	0	-1.67	0.062
Ebola virus pathway in host	0	114	141	0	-1.67	0.061
Ras signaling	0	130	192	0	-1.79	0.062
Ciliopathies	0	137	184	0	-1.84	0.051
EGF/EGFR signaling pathway	0	142	163	0	-1.87	0.036
Acrylamide biotransformation and exposure biomarkers	0	0	10	NaN%	NaN	0
Amino acid conjugation of benzoic acid	0	0	15	NaN%	NaN	0
Amino acid conjugation	0	0	7	NaN%	NaN	0
Biochemical pathways: part I	0	0	471	NaN%	NaN	0
Blood clotting and drug effects	0	0	13	NaN%	NaN	0
Colchicine metabolic pathway	0	0	5	NaN%	NaN	0
Felbamate metabolism	0	0	12	NaN%	NaN	0
Lidocaine metabolism	0	0	11	NaN%	NaN	0
Liver steatosis adverse outcome pathway	0	0	46	NaN%	NaN	0
Metabolism of dichloroethylene by CYP450	0	0	13	NaN%	NaN	0
Metabolism of tetrahydrocannabinol (THC)	0	0	11	NaN%	NaN	0
Metabolism overview	0	0	116	NaN%	NaN	0
Meta pathway lipodystrophy, dyslipidemia and hyperlipidemia	0	0	13	NaN%	NaN	0
Mitochondrial complex I inhibition leading to chemical-induced Fanconi syndrome	0	0	21	NaN%	NaN	0
Modified nucleosides derived from tRNA as urinary cancer markers	0	0	21	NaN%	NaN	0
Ophthalmate biosynthesis in hepatocytes	0	0	10	NaN%	NaN	0
Phosphatidylcholine catabolism	0	0	32	NaN%	NaN	0
Role of carnosine in muscle contraction	0	0	14	NaN%	NaN	0
