# Supplementary material for: Evaluation of Adverse Effects of Resorbable Hyaluronic Acid Fillers: Determination of Macrophage Responses
Source: Int J Mol Sci. 2022 Jun 30;23(13):7275. doi: 10.3390/ijms23137275 (PMC9266407; doi:10.3390/ijms23137275)
Supplement: Supplementary file 1 [file ijms-23-07275-s001.zip › De Jong et al IJMS Suppl Table S3.xlsx]

## Sheet: Read me
Supplementary Table S3
Output of the gene expression analyses for genes of the cell cycle (pathway). For each of the selected groups of the in vitro experiments a paired analysis between the exposures and their controls was conducted using a moderated t-test of the Limma (Linear Models for Microarray Data) R-package. Log2 fold changes, p-values and Benjamini-Hochberg adjusted p-values are provided. Adjusted p-values <0…
Part of
Evaluation of adverse effects of resorbable hyaluronic acid fillers: determination of macrophage responses.
Wim H. De Jong1, Danyel Jennen2, Peter H.J. Keizers3, Rob J. Vandebriel3, Hennie M. Hodemaekers3, Jolanda P. Vermeulen3, Frank Bakker3, Paul Schwillens3, Marcel van Herwijnen2, Marlon Jetten2, Jos C.S. Kleinjans2, Robert E. Geertsma3
1) Formerly Centre for Health Protection, National Institute for Public Health and the Environment (RIVM), Bilthoven, The Netherlands (retired)
2) Department of Toxicogenomics, GROW School for Oncology and Developmental Biology, Maastricht University, Maastricht, The Netherlands
3) Centre for Health Protection, National Institute for Public Health and the Environment (RIVM), Bilthoven, The Netherlands
Correspondance:
Wim H de Jong, whm.de.jong@ziggo.nl
Rob J. Vandebriel, rob.vandebriel@rivm.nl

## Sheet: RIVM
AgilentID	EntrezGeneID	GeneSymbol	RIVM1_logFC	RIVM1_P.Value	RIVM1_adj.P.Val	RIVM2_logFC	RIVM2_P.Value	RIVM2_adj.P.Val	RIVM3_logFC	RIVM3_P.Value	RIVM3_adj.P.Val	RIVM4_logFC	RIVM4_P.Value	RIVM4_adj.P.Val	RIVM5_logFC	RIVM5_P.Value	RIVM5_adj.P.Val
A_23_P60180	25	ABL1	0.0268559	0.80032	0.944174	-0.0759146	0.422106	0.804301	0.0418004	0.694276	0.892577	-0.0979779	0.303689	0.871684	-0.0395095	0.67358	0.95426
A_24_P282416	25	ABL1	0.164195	0.257954	0.636869	0.233185	0.0778102	0.454989	0.112727	0.431994	0.755483	0.0288354	0.817886	0.983757	0.120031	0.344923	0.882981
A_33_P3262138	64682	ANAPC1	0.127655	0.37124	0.735517	-0.19167	0.137478	0.558659	0.114588	0.420949	0.748356	-0.0365845	0.768505	0.979321	0.122066	0.333297	0.878822
A_32_P12104	64682	ANAPC1	0.632557	0.0193807	0.227466	0.418911	0.0677892	0.434631	-0.21544	0.385809	0.724613	0.00681403	0.97485	0.998106	0.561862	0.0186361	0.678264
A_23_P17204	64682	ANAPC1	-0.120029	0.196293	0.573285	-0.179136	0.0371341	0.349179	-0.219256	0.0261325	0.265677	-0.106908	0.191981	0.807403	-0.0130244	0.869949	0.983755
A_21_P0011838	64682	ANAPC1	0.25852	0.0899271	0.418845	-0.0378508	0.767281	0.945065	0.103569	0.478507	0.784966	0.0845987	0.510894	0.9379	0.0478243	0.708724	0.959816
A_33_P3363655	64682	ANAPC1	0.196568	0.162282	0.530495	-0.189295	0.129274	0.546555	0.00027817	0.998367	0.999251	0.0641505	0.594164	0.950386	0.154641	0.209329	0.832094
A_24_P186346	64682	ANAPC1	0.148619	0.153246	0.517475	0.0903617	0.315761	0.739521	0.0632924	0.531167	0.81523	-0.0141061	0.873408	0.988247	-0.0222836	0.801403	0.973652
A_21_P0011929	64682	ANAPC1	0.342303	0.0899553	0.418845	0.068533	0.686142	0.918901	0.242905	0.217641	0.587284	0.083305	0.623757	0.957916	0.350237	0.0527577	0.728883
A_23_P250994	10393	ANAPC10	0.110324	0.165664	0.53403	-0.0091713	0.892462	0.977438	-0.0551468	0.477357	0.784403	-0.000367099	0.995681	0.999879	0.0989938	0.158737	0.803017
A_23_P27147	51529	ANAPC11	0.0141508	0.837884	0.955922	0.0341773	0.576926	0.880177	-0.0119206	0.86313	0.95543	0.0296084	0.628418	0.958501	0.0395628	0.519182	0.926178
A_32_P16854	25847	ANAPC13	0.200727	0.0894194	0.418134	0.0959491	0.340103	0.75593	0.0837785	0.45987	0.772604	0.0782179	0.434345	0.917501	0.0817058	0.414582	0.897257
A_23_P253068	29882	ANAPC2	0.0384981	0.682737	0.899868	-0.019391	0.815001	0.958998	-0.0650946	0.491824	0.79255	0.00381555	0.963245	0.996537	-0.0203434	0.806109	0.974929
A_23_P317800	29945	ANAPC4	0.0879923	0.328385	0.70164	-0.0244985	0.754017	0.94111	0.000507734	0.995424	0.998502	0.0459305	0.55857	0.946145	0.00462192	0.952781	0.993977
A_23_P204448	51433	ANAPC5	-0.0436423	0.600467	0.864718	-0.0639065	0.388279	0.784917	0.0274864	0.740793	0.911213	0.0180467	0.805239	0.981767	0.0427101	0.561421	0.935453
A_23_P44643	51434	ANAPC7	0.113573	0.246044	0.624327	0.00328959	0.968871	0.994017	0.0591511	0.538842	0.819186	0.098191	0.254878	0.848075	0.12467	0.153661	0.799002
A_33_P3218410	472	ATM	0.326244	0.0196939	0.227991	0.0211022	0.850405	0.966619	0.309405	0.0256964	0.264579	-0.00140974	0.989941	0.999529	-0.135281	0.237803	0.840933
A_33_P3589722	472	ATM	0.372701	0.000516828	0.0668127	0.222119	0.00932657	0.208277	0.222102	0.0189647	0.238978	0.129406	0.102433	0.722622	0.109345	0.162183	0.804827
A_23_P35916	472	ATM	-0.19496	0.152256	0.516068	-0.0219189	0.849948	0.966562	-0.0582703	0.658376	0.879332	0.036767	0.751257	0.975762	0.121795	0.301902	0.866554
A_33_P3362498	545	ATR	0.10178	0.443431	0.783602	-0.172957	0.150171	0.577395	0.0237567	0.856651	0.953263	0.0599165	0.606781	0.953242	0.15225	0.201725	0.830465
A_23_P136058	545	ATR	-0.0268657	0.75834	0.929182	-0.178037	0.0327815	0.333849	-0.0884095	0.318969	0.675836	-0.0510514	0.509764	0.9379	0.00705606	0.926861	0.990945
A_23_P124417	699	BUB1	-0.613247	0.0244563	0.247741	-1.05364	0.000209312	0.0341345	-0.877832	0.00276624	0.122444	-0.639074	0.00984212	0.462118	-0.221052	0.32201	0.875232
A_23_P46924	9184	BUB3	0.11273	0.143683	0.503252	-0.102269	0.133216	0.551905	-0.0406139	0.586252	0.843454	-0.0379095	0.564681	0.947246	0.0118571	0.856311	0.982785
A_23_P320658	9184	BUB3	0.00600819	0.942885	0.983788	-0.0493895	0.507351	0.848541	-0.139535	0.111609	0.461866	-0.00945974	0.898208	0.991381	0.065161	0.384406	0.889887
A_23_P48414	8900	CCNA1	0.328895	0.373369	0.737103	0.47843	0.150986	0.578104	0.644694	0.0924512	0.432819	0.0401945	0.900449	0.992025	0.63491	0.0630933	0.74136
A_23_P58321	890	CCNA2	-0.695584	0.00347347	0.122621	-1.08838	1.95676e-05	0.0121899	-0.97218	0.00022037	0.0575298	-0.706456	0.0011906	0.344078	-0.252315	0.173565	0.813751
A_33_P3401621	891	CCNB1	-0.29599	0.13675	0.495261	-0.354672	0.049605	0.390476	-0.330106	0.099987	0.443859	-0.136822	0.422396	0.915485	0.0142209	0.932801	0.991886
A_23_P122197	891	CCNB1	-0.393594	0.0789764	0.400067	-0.600506	0.00531725	0.163397	-0.638477	0.00805498	0.174876	-0.36544	0.065766	0.67343	-0.0275204	0.883033	0.985752
A_23_P65757	9133	CCNB2	-0.307011	0.0521538	0.337844	-0.449827	0.00323335	0.129971	-0.446974	0.00783172	0.17257	-0.257028	0.0635785	0.670783	-0.0383046	0.769134	0.970427
A_23_P171107	85417	CCNB3	0.225605	0.300909	0.67963	0.259066	0.183261	0.613549	0.407685	0.0721205	0.39499	0.258417	0.184295	0.802723	0.289587	0.139753	0.789968
A_23_P202837	595	CCND1	0.110068	0.19777	0.574477	0.0323282	0.6597	0.909896	0.0684172	0.415191	0.745734	0.030659	0.676143	0.968653	-0.01735	0.812745	0.976318
A_23_P361773	896	CCND3	-0.156238	0.265284	0.644123	-0.235997	0.0662099	0.431778	-0.347769	0.0212512	0.249893	-0.276275	0.0349591	0.600095	-0.16019	0.198414	0.829512
A_23_P209200	898	CCNE1	-0.565855	0.00113516	0.0829943	-0.737267	2.8706e-05	0.0131143	-0.622485	0.000507789	0.0691597	-0.440119	0.00296509	0.373338	-0.348967	0.0131793	0.678204
A_33_P3217819	9134	CCNE2	-0.529765	0.0622529	0.364025	-0.876151	0.00185421	0.100354	-0.842302	0.00598983	0.156291	-0.395275	0.108721	0.728379	-0.582017	0.0240815	0.680349
A_33_P3247022	9134	CCNE2	-0.789088	0.00429049	0.12979	-1.17805	4.44842e-05	0.0143205	-1.16863	0.000169685	0.0521291	-0.825219	0.00120088	0.344078	-0.469682	0.0382059	0.697783
A_23_P30338	902	CCNH	-0.0373926	0.695468	0.90409	-0.119663	0.168276	0.598565	-0.133425	0.175169	0.542897	-0.0765172	0.369068	0.895707	0.0530332	0.530598	0.929565
A_23_P216679	8555	CDC14B	-0.0486452	0.860653	0.962586	-0.0336725	0.890352	0.97681	-0.0476814	0.863383	0.95543	-0.070419	0.773361	0.979903	0.0392219	0.87244	0.983827
A_33_P3231557	8555	CDC14B	-0.0164652	0.92468	0.978253	-0.17725	0.258908	0.691351	-0.0226454	0.89656	0.966763	0.0650101	0.672914	0.967686	0.102335	0.508286	0.923249
A_33_P3392325	8881	CDC16	0.126875	0.0836943	0.407536	0.0628544	0.313973	0.738123	0.0696952	0.324586	0.681446	0.0306573	0.618629	0.95661	0.034568	0.575043	0.937959
A_23_P149200	991	CDC20	-0.371663	0.127399	0.481763	-0.623963	0.00781611	0.194915	-0.455036	0.0669545	0.383207	-0.334596	0.120146	0.744317	-0.103857	0.61617	0.944444
A_23_P133629	8697	CDC23	-0.148845	0.141057	0.500604	-0.274595	0.00544154	0.1653	-0.294457	0.00780654	0.17257	-0.223328	0.0185132	0.535498	-0.0866013	0.321188	0.874915
A_24_P913227	8697	CDC23	-0.122443	0.532382	0.832999	-0.281661	0.11637	0.527441	-0.142324	0.469041	0.779366	0.0055117	0.974394	0.998106	0.134538	0.438163	0.905197
A_24_P397107	993	CDC25A	-0.813711	0.000896171	0.0763328	-1.04201	2.5387e-05	0.0131103	-0.905558	0.000354473	0.0641364	-0.582597	0.00433574	0.399152	-0.355585	0.058088	0.736162
A_23_P210726	994	CDC25B	-0.121956	0.403939	0.758089	-0.207066	0.119096	0.530963	-0.147687	0.314842	0.672764	-0.0794696	0.535075	0.941174	-0.0163206	0.897983	0.987864
A_23_P66777	996	CDC27	0.14872	0.103562	0.442545	0.0370296	0.631277	0.900927	0.113659	0.204974	0.575156	0.156893	0.0557908	0.65071	0.101477	0.199579	0.830281
A_33_P3360718	996	CDC27	0.216326	0.0299004	0.273743	-0.0507387	0.532353	0.861133	0.0855786	0.357037	0.704357	0.0892272	0.278798	0.861108	0.176046	0.0426777	0.70014
A_23_P57379	8318	CDC45	-0.818383	0.00349828	0.122826	-1.1259	7.60866e-05	0.0196462	-0.962616	0.00101359	0.0863394	-0.85604	0.000943749	0.343607	-0.530691	0.0222674	0.680349
A_23_P148807	8317	CDC7	-0.370827	0.0698107	0.380072	-0.640613	0.00168738	0.0954997	-0.483947	0.0223683	0.253867	-0.440828	0.0189151	0.535498	-0.285312	0.108934	0.775505
A_23_P138507	983	CDK1	-0.660562	0.0192565	0.227218	-0.99614	0.000447964	0.0484897	-0.966966	0.00163737	0.103312	-0.608784	0.0151878	0.501337	-0.305225	0.189051	0.82314
A_23_P98898	1017	CDK2	0.0709375	0.566472	0.850291	-0.146084	0.191278	0.6222	0.0625148	0.612973	0.857228	0.0709338	0.516242	0.93844	0.0342004	0.752946	0.966893
A_23_P24997	1019	CDK4	-0.0473945	0.614455	0.872127	-0.0259533	0.753721	0.94111	0.0492662	0.600674	0.850973	-0.0171771	0.835349	0.986298	-0.036707	0.657785	0.950653
A_24_P166663	1021	CDK6	0.134545	0.191167	0.565675	-0.0779781	0.382212	0.78248	0.0411766	0.681022	0.887176	0.0594613	0.502841	0.937742	0.0151911	0.863092	0.983501
A_23_P133585	1022	CDK7	0.16887	0.108924	0.451794	0.0682494	0.446438	0.818529	-0.00301123	0.976133	0.992446	-0.0320831	0.718292	0.973592	0.039324	0.658738	0.950653
A_24_P89457	1026	CDKN1A	0.245808	0.0194	0.227585	0.236343	0.0120671	0.22764	0.351152	0.00199715	0.109525	0.271675	0.0050757	0.41391	0.244933	0.00978601	0.67098
A_23_P204696	1027	CDKN1B	0.246309	0.109549	0.452583	0.0910781	0.486171	0.839361	0.0250135	0.865034	0.955706	-0.0188133	0.88469	0.99006	0.0633868	0.626407	0.945965
A_24_P81841	1027	CDKN1B	0.0877214	0.538372	0.836111	-0.00720518	0.953986	0.990509	-0.0442739	0.754987	0.915733	-0.0792144	0.528681	0.939528	-0.0104299	0.933437	0.991933
A_23_P428129	1028	CDKN1C	0.34737	0.0585038	0.354742	0.321436	0.0483508	0.386686	0.253355	0.155797	0.519305	0.0471408	0.756639	0.976691	0.0731429	0.631437	0.94667
A_23_P43490	1029	CDKN2A	0.0607099	0.603698	0.866595	0.0761562	0.462276	0.827656	0.202922	0.0969067	0.439018	0.0903308	0.385042	0.90044	0.123845	0.238925	0.840933
A_33_P3292540	1031	CDKN2C	-0.0644751	0.556673	0.845205	-0.118549	0.229239	0.663131	-0.0828161	0.452001	0.767885	-0.117836	0.231914	0.835312	-0.11824	0.230398	0.837283
A_23_P89941	1032	CDKN2D	0.0114796	0.946396	0.984607	-0.0774208	0.608641	0.893132	-0.123321	0.474077	0.78167	-0.0585658	0.69796	0.970892	0.0118499	0.937255	0.992702
A_33_P3349536	1111	CHEK1	-0.278499	0.0819001	0.40471	-0.490171	0.00208085	0.106359	-0.362948	0.0282011	0.273872	-0.28684	0.0457948	0.627451	-0.109035	0.420199	0.899592
A_33_P3386760	11200	CHEK2	0.208831	0.347846	0.717099	-0.0460391	0.811739	0.95727	-0.199789	0.368504	0.711635	-0.0172132	0.92898	0.994044	0.322088	0.110831	0.775998
A_21_P0011391	11200	CHEK2	-0.0122098	0.936245	0.981711	-0.126297	0.355149	0.765013	-0.157619	0.310478	0.669228	-0.0169871	0.899564	0.991934	0.074878	0.579912	0.93848
A_21_P0011475	11200	CHEK2	-0.0736715	0.426097	0.772026	-0.100946	0.223031	0.656122	-0.039665	0.665825	0.882531	-0.121212	0.147808	0.775167	0.0540962	0.505969	0.923176
A_23_P109452	11200	CHEK2	-0.045955	0.711627	0.911289	-0.0451034	0.680843	0.91689	0.0248569	0.841252	0.946886	-0.0439478	0.688543	0.968653	-0.0299997	0.784064	0.972788
A_21_P0011474	11200	CHEK2	0.0199225	0.876629	0.967105	-0.0871053	0.445806	0.818439	-0.127897	0.326914	0.682889	-0.182213	0.122451	0.747966	-0.0255151	0.821653	0.97876
A_21_P0011476	11200	CHEK2	-0.0619472	0.679853	0.898822	-0.105967	0.427047	0.806781	-0.0443026	0.767572	0.920715	-0.093881	0.480611	0.933852	-0.0405533	0.758968	0.968534
A_24_P303589	8454	CUL1	0.0290551	0.733941	0.920036	-0.0664105	0.383591	0.783274	-0.024329	0.775818	0.923456	-0.120006	0.125835	0.753746	-0.0224092	0.766093	0.970075
A_33_P3413523	10926	DBF4	0.0181288	0.824165	0.951616	-0.12865	0.0890484	0.476001	-0.00866068	0.915409	0.97291	0.058091	0.424127	0.916382	0.133343	0.0790326	0.750781
A_23_P80032	1869	E2F1	-0.467756	0.0217791	0.23665	-0.669161	0.000866138	0.0692575	-0.489394	0.0172147	0.230161	-0.409266	0.0226256	0.558435	-0.298536	0.0834198	0.763099
A_23_P408955	1870	E2F2	-0.945412	0.00359603	0.123579	-1.17166	0.000218586	0.0351839	-1.25547	0.000369022	0.0656017	-0.997635	0.000906465	0.343607	-0.521374	0.0473787	0.713501
A_23_P385034	1871	E2F3	0.0885173	0.212631	0.589432	0.158296	0.0186804	0.271265	0.141135	0.0557096	0.357629	0.181765	0.00850994	0.444162	0.168606	0.0132496	0.678204
A_33_P3418516	1871	E2F3	0.393211	0.0052751	0.13665	0.0140689	0.896205	0.978679	0.142658	0.254221	0.619812	0.0427833	0.692292	0.969414	0.15166	0.173385	0.813469
A_23_P152218	1874	E2F4	0.0191445	0.831843	0.953279	0.0596707	0.45685	0.824695	0.105312	0.253278	0.619585	0.126499	0.126464	0.754161	0.0510294	0.523515	0.928047
A_23_P31721	1875	E2F5	0.0645512	0.78875	0.940512	-0.166791	0.436593	0.812626	0.0670673	0.780744	0.925321	0.158794	0.458462	0.926492	0.134596	0.528634	0.928997
A_23_P40693	2033	EP300	0.188693	0.0507616	0.334975	-0.0240438	0.762823	0.944152	0.0255149	0.777652	0.923848	-0.0567178	0.479697	0.933207	0.00226517	0.977283	0.997037
A_23_P32707	9700	ESPL1	0.0908939	0.552284	0.843056	-0.0484908	0.718053	0.93004	0.204436	0.191812	0.561678	0.124945	0.358228	0.893013	-0.0440656	0.742729	0.965482
A_33_P3268368	51343	FZR1	0.225417	0.0317417	0.279607	0.0916866	0.291234	0.720759	0.185693	0.0698986	0.390148	0.169905	0.060995	0.663185	0.129604	0.14299	0.791682
A_23_P23221	1647	GADD45A	0.0877888	0.536387	0.835308	0.0726816	0.561182	0.874157	-0.0732502	0.605202	0.853535	-0.148111	0.24478	0.841744	-0.111879	0.374853	0.886159
A_24_P239606	4616	GADD45B	-0.0893153	0.750806	0.926428	-0.0390497	0.87469	0.972104	-0.121853	0.665295	0.88222	-0.0619783	0.802481	0.981503	0.0605748	0.806855	0.974965
A_24_P120934	10912	GADD45G	0.287947	0.0794504	0.400855	0.337034	0.0246898	0.298954	0.433859	0.0126276	0.204767	0.313711	0.0345815	0.600095	0.29038	0.048129	0.716077
A_33_P3252394	10912	GADD45G	0.348391	0.0238652	0.244754	0.356329	0.0106801	0.216112	0.449797	0.00547597	0.149858	0.306869	0.023971	0.564226	0.29032	0.0312455	0.692217
A_23_P251342	2932	GSK3B	0.134291	0.0831964	0.40644	0.0104768	0.871594	0.971782	0.119606	0.11901	0.470935	0.0576243	0.380223	0.899565	0.022411	0.72995	0.963305
A_23_P114656	3065	HDAC1	-0.0362496	0.625279	0.876631	-0.119038	0.0832882	0.46528	-0.0934005	0.218564	0.587993	-0.0933087	0.166281	0.788061	-0.0519003	0.430791	0.90388
A_23_P122304	3066	HDAC2	-0.0676924	0.400155	0.755785	-0.111347	0.127194	0.544603	-0.0720631	0.371204	0.713714	-0.0237124	0.735512	0.975071	-0.00372774	0.957566	0.994218
A_21_P0012258	8379	MAD1L1	0.0799294	0.569141	0.850692	0.113474	0.363488	0.770808	0.254148	0.0842412	0.418944	0.0848714	0.493992	0.935668	0.210831	0.102296	0.768963
A_33_P3569068	8379	MAD1L1	0.0453662	0.745293	0.924585	0.0872622	0.48147	0.836196	0.112648	0.424217	0.749944	0.0613877	0.618926	0.95661	0.199259	0.120287	0.779524
A_33_P3359250	10459	MAD2L2	0.707083	0.0631858	0.365936	0.565083	0.0888949	0.475513	1.02752	0.0107231	0.193506	0.482388	0.141169	0.770025	0.699956	0.0397114	0.697783
A_23_P23206	10459	MAD2L2	0.139717	0.23607	0.613008	0.200888	0.0625869	0.425589	0.0853229	0.462515	0.774651	-0.00722523	0.94321	0.99495	0.0765389	0.45486	0.912361
A_32_P103633	4171	MCM2	-0.53943	0.00248771	0.106872	-0.602275	0.000357089	0.0440375	-0.606007	0.00100352	0.0863394	-0.414334	0.00645089	0.432175	-0.295571	0.0392662	0.697783
A_23_P7873	4172	MCM3	-0.518474	0.0011853	0.0839245	-0.676875	2.97507e-05	0.0131143	-0.61396	0.000274674	0.0592054	-0.477133	0.000833118	0.343607	-0.28346	0.0255264	0.681848
A_23_P370989	4173	MCM4	-0.410351	0.00834212	0.160447	-0.664507	5.51898e-05	0.016384	-0.538817	0.00120643	0.091174	-0.38033	0.00607712	0.426244	-0.244828	0.0574991	0.73615
A_33_P3284951	4174	MCM5	-0.286168	0.0165964	0.213117	-0.317376	0.00405664	0.146299	-0.307131	0.0111622	0.196094	-0.285068	0.00819259	0.444162	-0.206622	0.0431251	0.700391
A_23_P132277	4174	MCM5	-0.185	0.0748247	0.390469	-0.306141	0.00270476	0.118665	-0.363312	0.00192951	0.108949	-0.258818	0.00837592	0.444162	-0.173676	0.0595393	0.739573
A_23_P90612	4175	MCM6	-0.400133	0.0132378	0.194326	-0.372958	0.00956941	0.210811	-0.433438	0.00825397	0.17555	-0.287119	0.0371267	0.609243	-0.119964	0.353801	0.883451
A_23_P93690	4176	MCM7	-0.297915	0.0208301	0.232955	-0.410222	0.00110352	0.0778436	-0.259834	0.0396635	0.311625	-0.263605	0.0204437	0.546399	-0.184571	0.0893793	0.76336
A_33_P3258223	4176	MCM7	-0.0284485	0.879723	0.968088	-0.133382	0.425934	0.806458	-0.237896	0.217779	0.587284	-0.295091	0.0905035	0.713883	-0.0223078	0.892925	0.987469
A_24_P925664	4193	MDM2	0.0180243	0.84272	0.957828	-0.130409	0.118604	0.530331	-0.164278	0.085931	0.422714	-0.0747178	0.357656	0.89285	-0.0274791	0.731861	0.963957
A_33_P3361707	4193	MDM2	0.175316	0.104705	0.445032	-0.0501932	0.582888	0.883061	-0.0528323	0.610066	0.855287	0.0561275	0.53968	0.941951	0.0657353	0.473652	0.915969
A_19_P00810040	4193	MDM2	0.450256	0.0457128	0.321182	0.0246372	0.894082	0.977986	0.0631956	0.763645	0.91905	-0.0336441	0.855766	0.987497	0.0679825	0.713892	0.960391
A_23_P502750	4193	MDM2	0.206533	0.181529	0.554086	-0.0730412	0.582186	0.882543	0.077363	0.607182	0.854594	0.0853942	0.520866	0.938519	0.0555594	0.674894	0.954428
A_23_P215956	4609	MYC	-0.0762285	0.655682	0.890218	-0.176324	0.251351	0.68478	-0.0924491	0.589277	0.844921	-0.0463314	0.758112	0.977258	0.0271208	0.856787	0.982785
A_23_P45799	4998	ORC1	-0.561828	0.013241	0.194326	-1.13619	1.18381e-05	0.0106083	-0.771603	0.00157197	0.102813	-0.517164	0.0103137	0.470978	-0.323047	0.0866145	0.763242
A_33_P3381410	4999	ORC2	0.393714	0.00539133	0.137773	0.120633	0.275379	0.706927	0.117459	0.346523	0.696701	0.0230416	0.831655	0.986132	0.101977	0.35369	0.883351
A_23_P39616	4999	ORC2	-0.00631303	0.95594	0.986884	-0.0431523	0.669362	0.913272	0.101977	0.378623	0.719875	-0.0387072	0.701517	0.971607	-0.0376227	0.709455	0.959816
A_23_P42045	23595	ORC3	0.14569	0.137836	0.496183	0.0807393	0.339851	0.755876	-0.0769255	0.420575	0.748185	-0.0481055	0.565614	0.947246	-0.0658934	0.433593	0.905016
A_32_P141612	5000	ORC4	0.26709	0.143009	0.502252	0.151871	0.3344	0.751605	0.199124	0.267054	0.634499	0.0485606	0.754124	0.976277	0.188638	0.234519	0.840664
A_23_P131149	5000	ORC4	0.0420143	0.662073	0.892925	-0.0409739	0.629016	0.900598	-0.121425	0.21728	0.587166	-0.0495036	0.560163	0.946294	-0.0428539	0.613498	0.943504
A_23_P31414	5001	ORC5	-0.0735881	0.412977	0.762807	-0.136502	0.0969704	0.492678	-0.230658	0.0187557	0.238256	-0.146595	0.0766804	0.694878	-0.0413435	0.599346	0.94158
A_23_P100344	23594	ORC6	-0.613394	0.00174606	0.0947077	-0.910327	1.2609e-05	0.0107404	-0.728055	0.000419678	0.0679933	-0.542052	0.00171441	0.344078	-0.303308	0.04958	0.721101
A_23_P28886	5111	PCNA	-0.481976	0.00398161	0.126588	-0.626019	0.000160788	0.029092	-0.480099	0.00409063	0.135808	-0.418766	0.00440168	0.399152	-0.312099	0.024586	0.680349
A_33_P3258612	5111	PCNA	-0.449994	0.018408	0.222042	-0.681213	0.000400958	0.046441	-0.480138	0.0129138	0.206373	-0.395201	0.0187818	0.535498	-0.222097	0.158985	0.803017
A_19_P00806947	5111	PCNA	-0.442004	0.00392903	0.12632	-0.661313	3.80654e-05	0.0133764	-0.564476	0.000582723	0.0715077	-0.428833	0.00195627	0.351392	-0.288742	0.0233179	0.680349
A_33_P3397443	9088	PKMYT1	-0.663512	0.0105135	0.175259	-0.917079	0.000368659	0.0445772	-0.7094	0.00697795	0.165322	-0.658446	0.00498594	0.413149	-0.336865	0.112612	0.775998
A_23_P118174	5347	PLK1	-0.615338	0.0299054	0.273743	-0.588866	0.0199793	0.276444	-0.532704	0.0553637	0.356944	-0.438807	0.0712539	0.683447	-0.168131	0.46806	0.915212
A_23_P9603	5591	PRKDC	-0.144469	0.243447	0.621545	-0.292506	0.0139111	0.240653	-0.229201	0.0734038	0.398409	-0.187973	0.0934844	0.714943	-0.142759	0.19368	0.827282
A_33_P3337599	5591	PRKDC	-0.126801	0.242024	0.619697	-0.247324	0.0167761	0.259102	-0.363854	0.00332108	0.127831	-0.114846	0.229982	0.834657	0.0512213	0.584871	0.93848
A_23_P7636	9232	PTTG1	-0.515177	0.0168069	0.214453	-0.482174	0.0120522	0.22764	-0.458527	0.0301333	0.281228	-0.325978	0.07245	0.685173	-0.0478677	0.780259	0.972728
A_23_P18579	10744	PTTG2	-0.417077	0.0385097	0.301224	-0.423274	0.0197032	0.275006	-0.355848	0.0719394	0.394253	-0.242307	0.155394	0.779787	-0.00145635	0.992939	0.998684
A_23_P20463	5885	RAD21	-0.123077	0.260484	0.639453	0.0940385	0.326841	0.747268	-0.0344909	0.747558	0.913561	-0.0227437	0.809606	0.982362	0.0778178	0.414718	0.897257
A_23_P204850	5925	RB1	0.0156023	0.807183	0.946308	0.034183	0.546309	0.867121	-0.0461699	0.473683	0.781423	-0.0196216	0.728004	0.974654	0.0384981	0.497575	0.921402
A_23_P28733	5933	RBL1	-0.0816778	0.61357	0.871436	-0.389398	0.0139313	0.240653	-0.3378	0.0501246	0.342095	-0.260778	0.0817412	0.700455	-0.0386294	0.785802	0.972788
A_24_P416159	5934	RBL2	0.00306909	0.972614	0.992827	-0.00252544	0.974438	0.994966	-0.105679	0.248221	0.615999	-0.109414	0.178743	0.796575	-0.0186945	0.812685	0.976299
A_33_P3246318	9978	RBX1	-0.0403985	0.539795	0.836482	-0.0818165	0.170234	0.600082	-0.100812	0.138485	0.49978	-0.00118955	0.983554	0.99949	0.0971993	0.107663	0.77479
A_24_P566701	6500	SKP1	0.0701439	0.408997	0.760457	0.0609481	0.415625	0.801973	-0.0192608	0.818686	0.938703	0.000302193	0.996742	0.999879	0.0405784	0.585436	0.93848
A_23_P133424	6500	SKP1	0.0389717	0.622337	0.875337	0.0136321	0.844512	0.966377	-0.0811468	0.311742	0.670438	-0.0142611	0.837446	0.986619	0.0364967	0.601027	0.94158
A_23_P156310	6502	SKP2	-0.134651	0.477357	0.800145	-0.406411	0.0249471	0.300043	-0.445728	0.0293193	0.278599	-0.262947	0.127523	0.756484	-0.101487	0.542589	0.933293
A_32_P12580	4087	SMAD2	0.089817	0.522719	0.826613	-0.234774	0.0716162	0.442478	-0.058497	0.675955	0.886553	-0.160844	0.203756	0.818725	-0.148187	0.239689	0.84114
A_23_P48936	4088	SMAD3	0.108617	0.358545	0.725519	0.162535	0.128914	0.546242	-0.135039	0.257368	0.623558	-0.295301	0.0106677	0.475553	-0.368455	0.00245343	0.598062
A_19_P00804817	4089	SMAD4	0.167911	0.0713433	0.383454	0.0823335	0.297128	0.724803	0.021153	0.809969	0.935818	0.0911418	0.2504	0.845449	0.109329	0.172106	0.812182
A_19_P00812250	4089	SMAD4	0.192726	0.0944214	0.42679	0.104279	0.290176	0.720066	0.137023	0.223436	0.592433	0.0887329	0.365553	0.895161	0.0513849	0.596823	0.940729
A_23_P27346	4089	SMAD4	0.336878	0.0113233	0.180851	0.0298597	0.775199	0.947426	0.0242418	0.83793	0.945174	0.0876186	0.407033	0.909442	0.100148	0.345024	0.882981
A_33_P3290909	8243	SMC1A	-0.184665	0.0721801	0.385272	-0.00457278	0.957342	0.991065	0.00828824	0.931891	0.97809	0.0445378	0.60407	0.952888	0.129398	0.144882	0.793961
A_33_P3290914	8243	SMC1A	0.13604	0.245438	0.623883	0.0674395	0.506893	0.848175	0.09468	0.413274	0.744638	0.128747	0.214031	0.827064	0.189403	0.0757492	0.746048
A_24_P942604	8243	SMC1A	0.109186	0.441938	0.782843	-0.195649	0.129475	0.547012	-0.0117804	0.933203	0.978438	-0.0482613	0.69764	0.970705	0.050957	0.681744	0.955567
A_23_P138631	9126	SMC3	-0.0149057	0.850586	0.960256	-0.0148366	0.831606	0.963682	-0.0130561	0.868927	0.95698	-0.00062772	0.992816	0.999529	-0.067076	0.343603	0.882981
A_23_P357365	10274	STAG1	0.0686093	0.585802	0.858106	-0.156761	0.169708	0.600082	-0.0293765	0.814741	0.937283	0.0668836	0.547258	0.942996	0.0326157	0.768053	0.970139
A_33_P3304293	10735	STAG2	0.1149	0.314793	0.69135	0.250587	0.0213846	0.28499	0.114773	0.315309	0.672856	0.0772766	0.439836	0.919498	0.334516	0.00375992	0.654665
A_24_P66125	10735	STAG2	0.155295	0.109199	0.452206	0.11555	0.17107	0.600483	0.0256479	0.782172	0.925818	-0.0516644	0.529849	0.939528	0.0602589	0.46481	0.913778
A_33_P3304304	10735	STAG2	0.60033	0.0182707	0.221368	-0.248036	0.233014	0.667247	-0.00474476	0.983546	0.994898	-0.199324	0.33368	0.881846	-0.168722	0.41105	0.897022
A_23_P33856	10735	STAG2	0.161944	0.100013	0.436387	0.0189138	0.819332	0.95984	-0.014151	0.880185	0.961401	-0.00695852	0.932979	0.994836	0.0273153	0.74175	0.965482
A_32_P199301	7027	TFDP1	-0.0884488	0.356961	0.724442	-0.251346	0.00799728	0.196824	-0.111364	0.250089	0.617389	-0.11245	0.190791	0.807004	-0.0670078	0.426832	0.90168
A_33_P3384452	7027	TFDP1	-0.217496	0.0203113	0.231271	-0.373429	0.000148186	0.0286972	-0.379145	0.000414876	0.0676576	-0.228657	0.00743674	0.444162	-0.100397	0.193783	0.827333
A_33_P3384432	7029	TFDP2	-0.0639487	0.632602	0.880028	-0.157931	0.191964	0.622582	-0.561401	0.000677369	0.0748119	-0.330313	0.0120973	0.487425	-0.129796	0.279028	0.856827
A_24_P79054	7040	TGFB1	-0.0239176	0.792412	0.941052	-0.0340202	0.671712	0.913897	0.107503	0.247364	0.615566	0.0476956	0.553599	0.944758	0.0637037	0.431012	0.904037
A_24_P402438	7042	TGFB2	-0.0280752	0.845644	0.958589	-0.122477	0.342697	0.757008	-0.184609	0.212632	0.583728	0.0620582	0.62667	0.958501	0.0485027	0.703366	0.958643
A_33_P3315764	7157	TP53	0.0608755	0.829099	0.952555	-0.358464	0.163249	0.592372	-0.372968	0.1986	0.568735	-0.0271259	0.913069	0.992345	-0.101536	0.683616	0.955633
A_23_P259586	7272	TTK	-0.546836	0.091574	0.421138	-0.839743	0.00681833	0.182384	-0.714438	0.0326487	0.289018	-0.565169	0.0518191	0.637608	-0.320697	0.248831	0.845745
A_33_P3290567	7465	WEE1	-0.0418462	0.796499	0.942581	-0.0714872	0.618397	0.897105	-0.074409	0.647378	0.873134	-0.0694969	0.628124	0.958501	0.0481682	0.736547	0.964565
A_23_P120414	7529	YWHAB	0.00159148	0.978814	0.995143	-0.0306892	0.563621	0.875542	-0.068842	0.261239	0.628337	-0.053606	0.318751	0.877131	-0.0320629	0.546508	0.934156
A_33_P3407636	7531	YWHAE	0.461152	0.0914544	0.421135	0.175696	0.447546	0.819212	0.257403	0.32978	0.685027	0.182617	0.430228	0.916666	0.293471	0.212438	0.832878
A_24_P33444	7531	YWHAE	0.0393376	0.764789	0.931808	-0.0212408	0.85446	0.9668	-0.0569825	0.66526	0.88222	-0.118678	0.313766	0.874758	0.0684608	0.556539	0.934573
A_24_P106681	7532	YWHAG	-0.0142785	0.82647	0.951762	-0.0746581	0.205831	0.638327	-0.0291069	0.655793	0.877838	-0.00707401	0.901893	0.992208	0.0912483	0.126952	0.782416
A_23_P103070	7533	YWHAH	-0.121143	0.275658	0.654287	-0.252845	0.0173361	0.26283	-0.35592	0.00470711	0.142119	-0.183846	0.0706245	0.683447	-0.125745	0.202789	0.831001
A_23_P131723	10971	YWHAQ	-0.0301803	0.745584	0.924585	-0.0394369	0.631318	0.900927	-0.00801725	0.931196	0.977844	0.0509429	0.536424	0.941493	0.00299258	0.970836	0.99636
A_33_P3662553	10971	YWHAQ	0.00784574	0.934385	0.980885	-0.0241669	0.773906	0.947308	0.023972	0.801581	0.93311	-0.00639313	0.939342	0.99495	-0.0163742	0.845557	0.981909
A_32_P198923	7534	YWHAZ	0.215645	0.0667564	0.373583	0.160729	0.115302	0.525389	0.204842	0.0799758	0.410678	0.136746	0.175309	0.794856	0.276972	0.0115302	0.678204
A_32_P226149	7534	YWHAZ	-0.0623967	0.616594	0.872972	-0.0895891	0.418144	0.803222	-0.0560372	0.652686	0.876329	-0.17231	0.130358	0.758666	0.0902837	0.414626	0.897257
A_23_P654	7709	ZBTB17	0.125175	0.274577	0.653796	0.100581	0.317667	0.740311	0.250292	0.0387532	0.308496	0.177875	0.0877001	0.71025	0.135525	0.184095	0.818674

## Sheet: Bio-alcamid
AgilentID	EntrezGeneID	GeneSymbol	BioAlcamid_logFC	BioAlcamid_P.Value	BioAlcamid_adj.P.Val
A_23_P60180	25	ABL1	0.354621	0.00160076	0.00576822
A_24_P282416	25	ABL1	0.170561	0.186209	0.283349
A_33_P3262138	64682	ANAPC1	0.170592	0.182813	0.279313
A_32_P12104	64682	ANAPC1	0.410615	0.0728066	0.134401
A_23_P17204	64682	ANAPC1	-0.00818957	0.917981	0.942975
A_21_P0011838	64682	ANAPC1	0.118186	0.361755	0.476597
A_33_P3363655	64682	ANAPC1	0.183135	0.141236	0.22812
A_24_P186346	64682	ANAPC1	0.368612	0.000747119	0.00307737
A_21_P0011929	64682	ANAPC1	0.302849	0.0889254	0.157866
A_23_P250994	10393	ANAPC10	0.37502	5.20386e-05	0.000355942
A_23_P27147	51529	ANAPC11	-0.197711	0.00496286	0.0147647
A_32_P16854	25847	ANAPC13	-0.261235	0.0172034	0.0412535
A_23_P253068	29882	ANAPC2	-0.0862991	0.306164	0.419246
A_23_P317800	29945	ANAPC4	0.154907	0.0621262	0.118297
A_23_P204448	51433	ANAPC5	-0.180041	0.0245397	0.055264
A_23_P44643	51434	ANAPC7	-0.0527993	0.533851	0.640269
A_33_P3218410	472	ATM	0.294722	0.0173229	0.04148
A_33_P3589722	472	ATM	0.179896	0.028895	0.0632611
A_23_P35916	472	ATM	0.202642	0.0957161	0.167336
A_33_P3362498	545	ATR	0.247381	0.0466879	0.0937693
A_23_P136058	545	ATR	0.165981	0.04451	0.0901547
A_23_P124417	699	BUB1	-0.781716	0.00256991	0.00856798
A_23_P46924	9184	BUB3	0.0166157	0.799802	0.85706
A_23_P320658	9184	BUB3	0.237589	0.00529164	0.0155987
A_23_P48414	8900	CCNA1	2.28418	3.25881e-06	4.10256e-05
A_23_P58321	890	CCNA2	-1.02714	3.63253e-05	0.000268066
A_33_P3401621	891	CCNB1	-0.253138	0.148005	0.23654
A_23_P122197	891	CCNB1	-0.281026	0.147556	0.235976
A_23_P65757	9133	CCNB2	-0.198838	0.1419	0.229028
A_23_P171107	85417	CCNB3	0.553385	0.00944539	0.0252108
A_23_P202837	595	CCND1	-0.0712458	0.338	0.452603
A_23_P361773	896	CCND3	0.444489	0.00204288	0.00707148
A_23_P209200	898	CCNE1	-0.417662	0.00428767	0.0130537
A_33_P3217819	9134	CCNE2	-0.838833	0.00257159	0.00857242
A_33_P3247022	9134	CCNE2	-1.11169	8.04769e-05	0.000505797
A_23_P30338	902	CCNH	0.208722	0.0234574	0.053267
A_23_P216679	8555	CDC14B	-0.739681	0.0077455	0.0213851
A_33_P3231557	8555	CDC14B	-0.44253	0.0104731	0.0274233
A_33_P3392325	8881	CDC16	-0.0115206	0.851063	0.895146
A_23_P149200	991	CDC20	-0.825118	0.00104609	0.00406305
A_23_P133629	8697	CDC23	-0.0355706	0.679363	0.761959
A_24_P913227	8697	CDC23	0.100265	0.561589	0.663766
A_24_P397107	993	CDC25A	-1.23684	3.73816e-06	4.55787e-05
A_23_P210726	994	CDC25B	-0.506087	0.00109714	0.00422082
A_23_P66777	996	CDC27	-0.00523979	0.945642	0.963443
A_33_P3360718	996	CDC27	0.184481	0.0348124	0.0736352
A_23_P57379	8318	CDC45	-1.40671	6.9714e-06	7.31923e-05
A_23_P148807	8317	CDC7	-1.47006	3.06624e-07	6.68478e-06
A_23_P138507	983	CDK1	-1.08066	0.000212878	0.00111006
A_23_P98898	1017	CDK2	-0.669339	1.62125e-05	0.000140633
A_23_P24997	1019	CDK4	0.103139	0.223687	0.327937
A_24_P166663	1021	CDK6	-0.717844	6.33338e-07	1.17638e-05
A_23_P133585	1022	CDK7	0.437142	0.000164302	0.000901442
A_24_P89457	1026	CDKN1A	0.675311	7.52323e-07	1.33014e-05
A_23_P204696	1027	CDKN1B	0.141615	0.284488	0.395707
A_24_P81841	1027	CDKN1B	0.120211	0.343291	0.457773
A_23_P428129	1028	CDKN1C	0.665996	0.000479001	0.00214439
A_23_P43490	1029	CDKN2A	0.202884	0.0630373	0.119618
A_33_P3292540	1031	CDKN2C	-0.160233	0.111023	0.188186
A_23_P89941	1032	CDKN2D	-0.529281	0.00282983	0.00928101
A_33_P3349536	1111	CHEK1	-0.233532	0.0963853	0.168301
A_33_P3386760	11200	CHEK2	0.350485	0.0850911	0.152424
A_21_P0011391	11200	CHEK2	0.31748	0.0301148	0.065487
A_21_P0011475	11200	CHEK2	0.31058	0.0014275	0.00524522
A_23_P109452	11200	CHEK2	0.349697	0.00546315	0.0160109
A_21_P0011474	11200	CHEK2	0.30675	0.0148254	0.0365228
A_21_P0011476	11200	CHEK2	0.330734	0.022472	0.0514249
A_24_P303589	8454	CUL1	-0.111187	0.153835	0.243784
A_33_P3413523	10926	DBF4	0.162836	0.0362143	0.0760745
A_23_P80032	1869	E2F1	-1.32145	7.04512e-07	1.26822e-05
A_23_P408955	1870	E2F2	-0.933476	0.00154914	0.00561405
A_23_P385034	1871	E2F3	0.0815446	0.193854	0.292359
A_33_P3418516	1871	E2F3	0.159414	0.153755	0.243734
A_23_P152218	1874	E2F4	0.0429132	0.590864	0.688229
A_23_P31721	1875	E2F5	-0.0983682	0.644093	0.733216
A_23_P40693	2033	EP300	0.0961225	0.238345	0.344315
A_23_P32707	9700	ESPL1	0.593692	0.000437486	0.00199566
A_33_P3268368	51343	FZR1	-0.406336	0.000223124	0.00115369
A_23_P23221	1647	GADD45A	-0.309163	0.0233965	0.0531578
A_24_P239606	4616	GADD45B	2.12401	3.35838e-07	7.1827e-06
A_24_P120934	10912	GADD45G	0.00178768	0.989592	0.993318
A_33_P3252394	10912	GADD45G	-0.00881844	0.943321	0.961592
A_23_P251342	2932	GSK3B	0.0823303	0.216107	0.319089
A_23_P114656	3065	HDAC1	-1.01191	1.24463e-10	2.61456e-08
A_23_P122304	3066	HDAC2	-0.162797	0.0323117	0.0692139
A_21_P0012258	8379	MAD1L1	0.715361	3.08889e-05	0.00023408
A_33_P3569068	8379	MAD1L1	0.6846	4.82073e-05	0.000335569
A_33_P3359250	10459	MAD2L2	1.0548	0.00404997	0.0124678
A_23_P23206	10459	MAD2L2	0.717664	3.44874e-06	4.28079e-05
A_32_P103633	4171	MCM2	-0.348229	0.0178632	0.0425598
A_23_P7873	4172	MCM3	-0.962861	5.09882e-07	9.90514e-06
A_23_P370989	4173	MCM4	-0.820701	5.55089e-06	6.12897e-05
A_33_P3284951	4174	MCM5	-0.457696	0.000202212	0.00106444
A_23_P132277	4174	MCM5	-0.463745	7.15731e-05	0.000461899
A_23_P90612	4175	MCM6	0.515515	0.000954116	0.00376902
A_23_P93690	4176	MCM7	-0.571063	5.1808e-05	0.000354854
A_33_P3258223	4176	MCM7	-0.373979	0.0368178	0.0770616
A_24_P925664	4193	MDM2	-0.176263	0.04097	0.0841256
A_33_P3361707	4193	MDM2	0.299039	0.00452869	0.0136699
A_19_P00810040	4193	MDM2	0.29593	0.124933	0.207008
A_23_P502750	4193	MDM2	0.240646	0.0839646	0.1507
A_23_P215956	4609	MYC	0.330938	0.0408952	0.0839929
A_23_P45799	4998	ORC1	-0.911666	0.000118644	0.000690815
A_33_P3381410	4999	ORC2	-0.194607	0.0879567	0.156482
A_23_P39616	4999	ORC2	-0.0622026	0.539579	0.644969
A_23_P42045	23595	ORC3	0.751665	1.77316e-07	4.51264e-06
A_32_P141612	5000	ORC4	-0.0457768	0.767759	0.831457
A_23_P131149	5000	ORC4	0.0456636	0.59066	0.688095
A_23_P31414	5001	ORC5	0.192404	0.0248288	0.0557934
A_23_P100344	23594	ORC6	-0.615429	0.000606735	0.00260158
A_23_P28886	5111	PCNA	-0.728794	3.47479e-05	0.000258736
A_33_P3258612	5111	PCNA	-0.811099	7.61044e-05	0.000484289
A_19_P00806947	5111	PCNA	-0.786659	5.6644e-06	6.2321e-05
A_33_P3397443	9088	PKMYT1	-0.921149	0.000354218	0.00167404
A_23_P118174	5347	PLK1	-0.763212	0.00420926	0.0128639
A_23_P9603	5591	PRKDC	-0.221266	0.0523102	0.10282
A_33_P3337599	5591	PRKDC	-0.0665551	0.479373	0.591003
A_23_P7636	9232	PTTG1	-0.388109	0.0362625	0.0761501
A_23_P18579	10744	PTTG2	-0.290647	0.0930015	0.163641
A_23_P20463	5885	RAD21	0.0600734	0.527008	0.633873
A_23_P204850	5925	RB1	0.0316048	0.576634	0.676082
A_23_P28733	5933	RBL1	-0.328905	0.0327544	0.0700591
A_24_P416159	5934	RBL2	0.036226	0.646986	0.735598
A_33_P3246318	9978	RBX1	0.0987162	0.102741	0.177102
A_24_P566701	6500	SKP1	0.356083	0.000205632	0.00107832
A_23_P133424	6500	SKP1	0.251399	0.00228794	0.00778282
A_23_P156310	6502	SKP2	0.108933	0.513793	0.621738
A_32_P12580	4087	SMAD2	0.149454	0.235883	0.341631
A_23_P48936	4088	SMAD3	0.466622	0.000351127	0.00166143
A_19_P00804817	4089	SMAD4	0.536946	4.38925e-06	5.12969e-05
A_19_P00812250	4089	SMAD4	0.475453	0.000166849	0.000913384
A_23_P27346	4089	SMAD4	0.260923	0.0228118	0.0520632
A_33_P3290909	8243	SMC1A	-0.124804	0.158662	0.249456
A_33_P3290914	8243	SMC1A	0.0386986	0.701862	0.78033
A_24_P942604	8243	SMC1A	-0.612231	0.000159541	0.000879215
A_23_P138631	9126	SMC3	-0.128624	0.080561	0.145805
A_23_P357365	10274	STAG1	0.16528	0.149103	0.238061
A_33_P3304293	10735	STAG2	0.856545	3.03188e-07	6.63906e-06
A_24_P66125	10735	STAG2	0.658299	7.28153e-07	1.30039e-05
A_33_P3304304	10735	STAG2	0.36805	0.0851582	0.152522
A_23_P33856	10735	STAG2	0.6225	1.67256e-06	2.43785e-05
A_32_P199301	7027	TFDP1	-0.552146	7.40757e-06	7.66356e-05
A_33_P3384452	7027	TFDP1	-0.77401	3.16834e-08	1.30677e-06
A_33_P3384432	7029	TFDP2	0.186484	0.127576	0.210388
A_24_P79054	7040	TGFB1	-0.490385	1.74916e-05	0.000149563
A_24_P402438	7042	TGFB2	-0.763353	2.16781e-05	0.000177463
A_33_P3315764	7157	TP53	0.0822322	0.741111	0.810601
A_23_P259586	7272	TTK	-0.880811	0.00498902	0.0148372
A_33_P3290567	7465	WEE1	-0.284978	0.0610091	0.116599
A_23_P120414	7529	YWHAB	-0.169395	0.00537705	0.0158003
A_33_P3407636	7531	YWHAE	0.457667	0.0605301	0.115845
A_24_P33444	7531	YWHAE	0.156416	0.189798	0.287486
A_24_P106681	7532	YWHAG	-0.07134	0.225616	0.330256
A_23_P103070	7533	YWHAH	-0.822119	3.42181e-07	7.29058e-06
A_23_P131723	10971	YWHAQ	0.35272	0.000558464	0.00242949
A_33_P3662553	10971	YWHAQ	0.4023	0.000214918	0.00111785
A_32_P198923	7534	YWHAZ	0.449775	0.000309133	0.00150032
A_32_P226149	7534	YWHAZ	0.267337	0.0254661	0.0569365
A_23_P654	7709	ZBTB17	0.0926616	0.356023	0.470578

## Sheet: Perfectha
AgilentID	EntrezGeneID	GeneSymbol	FL_logFC	FL_P.Value	FL_adj.P.Val	Dm_logFC	Dm_P.Value	Dm_adj.P.Val	Dp_logFC	Dp_P.Value	Dp_adj.P.Val	SD_logFC	SD_P.Value	SD_adj.P.Val
A_23_P60180	25	ABL1	-0.0035653	0.964624	0.988628	0.0325494	0.686401	0.882378	-0.0698308	0.391252	0.729316	0.082581	0.313098	0.693995
A_24_P282416	25	ABL1	0.40967	0.0524369	0.27967	-0.0522597	0.791289	0.929133	0.152026	0.445569	0.766136	0.173636	0.385087	0.749854
A_33_P3262138	64682	ANAPC1	-0.207823	0.0419252	0.249687	-0.0449723	0.636309	0.857361	-0.0339894	0.720347	0.900554	0.0902373	0.348394	0.723494
A_32_P12104	64682	ANAPC1	0.111634	0.59329	0.824814	-0.047505	0.819475	0.940593	0.154772	0.461099	0.775682	0.185746	0.3784	0.745429
A_23_P17204	64682	ANAPC1	-0.0930321	0.130131	0.420747	-0.144804	0.0251191	0.202464	-0.0802804	0.187067	0.546611	-0.10972	0.0785895	0.41473
A_21_P0011838	64682	ANAPC1	-0.0441386	0.613613	0.835529	-0.055189	0.528867	0.797454	0.0503779	0.564944	0.832255	0.0708862	0.420701	0.77056
A_33_P3363655	64682	ANAPC1	-0.225161	0.300485	0.618547	-0.14041	0.513623	0.788249	-0.212306	0.327922	0.681018	-0.0218958	0.918262	0.980121
A_24_P186346	64682	ANAPC1	0.227899	0.023901	0.191895	0.0878496	0.34665	0.667667	0.23375	0.0210514	0.218582	0.184855	0.0593104	0.371077
A_21_P0011929	64682	ANAPC1	0.000749547	0.996394	0.998598	0.0628753	0.705358	0.890906	0.161915	0.336978	0.688569	0.153769	0.361088	0.732227
A_23_P250994	10393	ANAPC10	0.0331981	0.597122	0.825998	0.119613	0.0712318	0.327631	0.103373	0.113899	0.451968	0.124872	0.0608872	0.374948
A_23_P27147	51529	ANAPC11	-0.0473257	0.314864	0.631137	-0.00458591	0.921015	0.975974	0.00174135	0.969962	0.99002	0.0113716	0.805952	0.948211
A_32_P16854	25847	ANAPC13	-0.110274	0.0723684	0.322193	-0.0897226	0.136395	0.44237	-0.0255718	0.659718	0.873633	-0.00910819	0.875007	0.969713
A_23_P253068	29882	ANAPC2	-0.0409213	0.703517	0.882643	-0.0261984	0.807213	0.935565	0.057203	0.595625	0.846301	0.0245027	0.819445	0.952735
A_23_P317800	29945	ANAPC4	0.100219	0.108122	0.38687	0.041977	0.484541	0.769195	0.0523542	0.385561	0.725199	0.102181	0.101976	0.454386
A_23_P204448	51433	ANAPC5	-0.0595111	0.224207	0.54104	-0.00785553	0.869199	0.959426	0.0317895	0.508271	0.801414	-0.016718	0.72644	0.920059
A_23_P44643	51434	ANAPC7	0.0482296	0.467872	0.749814	0.0272521	0.679737	0.878999	0.0684961	0.307037	0.665206	0.120072	0.0839495	0.423079
A_33_P3218410	472	ATM	-0.367548	0.0368901	0.234733	-0.0699161	0.668298	0.873346	-0.0287987	0.859528	0.952331	0.122306	0.456515	0.793356
A_33_P3589722	472	ATM	-0.142929	0.119865	0.404332	-0.0546396	0.537264	0.80208	-0.0145256	0.868902	0.956334	0.0161429	0.854476	0.96395
A_23_P35916	472	ATM	0.101908	0.486654	0.761103	0.118025	0.421788	0.727352	0.422236	0.0101065	0.159196	0.113255	0.440377	0.783448
A_33_P3362498	545	ATR	-0.0842215	0.432174	0.724853	-0.112235	0.299227	0.624904	0.0431781	0.684766	0.885258	-0.0292225	0.783169	0.94148
A_23_P136058	545	ATR	-0.116011	0.197679	0.507673	-0.0969416	0.277543	0.602851	-0.0594783	0.499703	0.797405	-0.138012	0.129813	0.501838
A_23_P124417	699	BUB1	-0.764532	0.000558352	0.0318823	-0.619641	0.0029438	0.0745077	-0.470026	0.0166165	0.196519	-0.544205	0.00707002	0.15512
A_23_P46924	9184	BUB3	-0.100195	0.12309	0.409829	-0.0989371	0.127483	0.428326	-0.046548	0.458996	0.77481	-0.048021	0.445188	0.786222
A_23_P320658	9184	BUB3	-0.0329332	0.545271	0.7976	-0.0596397	0.280271	0.605812	0.0241147	0.656872	0.871943	-0.0987128	0.08388	0.42294
A_23_P48414	8900	CCNA1	0.33361	0.114197	0.395057	-0.287963	0.168082	0.48436	-0.0394463	0.845187	0.948632	0.303723	0.147455	0.526468
A_23_P58321	890	CCNA2	-0.816523	0.000717275	0.0371942	-0.740361	0.00158472	0.0579265	-0.512275	0.017442	0.200608	-0.678766	0.00303014	0.109942
A_33_P3401621	891	CCNB1	-0.205319	0.203267	0.514701	-0.19818	0.218547	0.545902	-0.0683927	0.663659	0.875414	-0.106329	0.501014	0.819517
A_23_P122197	891	CCNB1	-0.400167	0.018647	0.170544	-0.366575	0.0288141	0.215955	-0.210895	0.183617	0.543584	-0.354938	0.0334363	0.301476
A_23_P65757	9133	CCNB2	-0.313745	0.0160519	0.159669	-0.213769	0.0837925	0.353268	-0.160539	0.184165	0.543891	-0.303773	0.0190507	0.242805
A_23_P171107	85417	CCNB3	0.0318285	0.840559	0.942319	-0.273615	0.0994224	0.381419	0.0865417	0.586091	0.842502	0.00334159	0.983137	0.995692
A_23_P202837	595	CCND1	-0.124065	0.0480917	0.266433	-0.0482422	0.414753	0.723769	-0.0381838	0.516754	0.805987	-0.0359696	0.541019	0.837009
A_23_P361773	896	CCND3	-0.0812255	0.188149	0.496877	-0.0976342	0.118369	0.413894	-0.0429977	0.476302	0.784729	-0.0335597	0.576928	0.853221
A_23_P209200	898	CCNE1	-0.737833	3.87561e-06	0.00349982	-0.622855	2.52022e-05	0.00945353	-0.584739	4.87013e-05	0.0170345	-0.636048	2.01529e-05	0.0128506
A_33_P3217819	9134	CCNE2	-0.968318	0.00222728	0.0598164	-1.1201	0.000699631	0.0393959	-0.376469	0.170618	0.527023	-0.732273	0.0137172	0.20779
A_33_P3247022	9134	CCNE2	-0.973433	4.00144e-05	0.00985485	-0.928876	6.46111e-05	0.0158048	-0.787691	0.000313615	0.0381222	-0.905175	8.36942e-05	0.0258308
A_23_P30338	902	CCNH	0.0367941	0.629901	0.844881	-0.0182234	0.810791	0.936813	0.0614558	0.424287	0.752908	-0.0330771	0.664629	0.894058
A_23_P216679	8555	CDC14B	0.139189	0.442693	0.732253	0.0686658	0.702665	0.889659	0.0966146	0.592136	0.844868	0.0457194	0.799086	0.946602
A_33_P3231557	8555	CDC14B	-0.0775063	0.569303	0.811123	-0.169168	0.223798	0.550674	0.0407389	0.763894	0.918229	-0.0129827	0.923631	0.981397
A_33_P3392325	8881	CDC16	0.0348699	0.446016	0.734753	0.0376544	0.411341	0.721741	0.0193944	0.669455	0.877643	0.0574607	0.216984	0.610577
A_23_P149200	991	CDC20	-0.612943	0.00556486	0.093768	-0.507602	0.0170521	0.166375	-0.376797	0.0645875	0.352417	-0.489815	0.0205439	0.249826
A_23_P133629	8697	CDC23	-0.149602	0.0399455	0.243523	-0.160392	0.0292199	0.217301	-0.0855089	0.217196	0.582326	-0.124183	0.081314	0.419268
A_24_P913227	8697	CDC23	-0.365406	0.0634334	0.30475	-0.153972	0.410694	0.721176	0.0698565	0.706295	0.894638	-0.112593	0.545213	0.838752
A_24_P397107	993	CDC25A	-0.918301	7.98932e-06	0.00442717	-0.866646	1.51174e-05	0.00837711	-0.762366	5.81985e-05	0.018671	-0.844954	1.98772e-05	0.0128506
A_23_P210726	994	CDC25B	-0.34354	0.0360687	0.233208	-0.155396	0.313025	0.638068	-0.150538	0.327866	0.681018	-0.217109	0.165558	0.550872
A_23_P66777	996	CDC27	-0.17479	0.0278673	0.206181	-0.123948	0.104264	0.390347	-0.0143871	0.843315	0.948218	-0.1106	0.143496	0.521651
A_33_P3360718	996	CDC27	0.0878722	0.383273	0.684668	-0.00661688	0.946941	0.984261	0.10352	0.306829	0.665164	0.081876	0.415749	0.767915
A_23_P57379	8318	CDC45	-1.04283	2.54097e-05	0.00834701	-0.903206	0.000109977	0.0204692	-0.792643	0.000373008	0.0402419	-0.89721	0.000117352	0.0283295
A_23_P148807	8317	CDC7	-0.755242	3.0695e-05	0.00894917	-0.684041	8.44524e-05	0.0180624	-0.433804	0.00395679	0.109808	-0.520348	0.00100601	0.0689007
A_23_P138507	983	CDK1	-0.854634	0.000485947	0.0298684	-0.807654	0.000787737	0.041485	-0.618446	0.00573952	0.127078	-0.722679	0.00191145	0.0926543
A_23_P98898	1017	CDK2	-0.322244	0.0165021	0.161588	-0.296816	0.0251343	0.202491	-0.118666	0.334396	0.686593	-0.188172	0.134938	0.510077
A_23_P24997	1019	CDK4	-0.0541299	0.417237	0.712899	-0.0784514	0.245571	0.572399	-0.0666752	0.320543	0.675145	-0.0480346	0.470508	0.801836
A_24_P166663	1021	CDK6	-0.351057	0.00223833	0.0599487	-0.208703	0.0442505	0.26386	-0.168949	0.0954698	0.418735	-0.178359	0.0799733	0.417253
A_23_P133585	1022	CDK7	0.0850662	0.203944	0.515771	0.036951	0.572163	0.823377	0.0936219	0.164501	0.519812	0.0846839	0.205871	0.598987
A_24_P89457	1026	CDKN1A	0.150497	0.0663961	0.311306	0.13148	0.104065	0.390176	0.177919	0.0336312	0.268177	0.154517	0.0602244	0.373751
A_23_P204696	1027	CDKN1B	0.138983	0.13935	0.434092	-0.0778029	0.395465	0.709445	0.134192	0.152472	0.506215	0.146513	0.120677	0.485698
A_24_P81841	1027	CDKN1B	-0.0102361	0.931387	0.977686	-0.103443	0.390454	0.704562	-0.00715532	0.952004	0.98492	0.0417039	0.726288	0.920038
A_23_P428129	1028	CDKN1C	0.352625	6.38416e-05	0.0124348	0.29244	0.000379082	0.0307973	0.333442	0.000111247	0.0253499	0.310078	0.000222328	0.0382009
A_23_P43490	1029	CDKN2A	0.0284806	0.875615	0.956336	0.0949393	0.603407	0.840462	0.0606821	0.739137	0.908384	-0.125616	0.493392	0.814812
A_33_P3292540	1031	CDKN2C	-0.179274	0.046061	0.260631	-0.192619	0.0338056	0.23249	-0.0985293	0.249663	0.616323	-0.201469	0.0274525	0.280179
A_23_P89941	1032	CDKN2D	-0.0981535	0.291957	0.61008	-0.148329	0.119921	0.416511	0.00915684	0.920126	0.975156	-0.105045	0.260723	0.651393
A_33_P3349536	1111	CHEK1	-0.368553	0.00590288	0.0967957	-0.340218	0.00971875	0.128227	-0.294047	0.0216839	0.220107	-0.314805	0.0151486	0.218036
A_33_P3386760	11200	CHEK2	0.119008	0.290066	0.60822	-0.0582704	0.598937	0.838161	0.233311	0.0486717	0.314278	0.110212	0.325847	0.704524
A_21_P0011391	11200	CHEK2	0.0127568	0.950783	0.983956	-0.0170007	0.934446	0.980422	0.133512	0.521325	0.808311	0.071255	0.730801	0.921587
A_21_P0011475	11200	CHEK2	-0.0384707	0.674872	0.868501	0.00205741	0.982046	0.995117	0.094836	0.308583	0.666538	0.0201161	0.825996	0.954967
A_23_P109452	11200	CHEK2	0.0305315	0.81087	0.931047	-0.0311921	0.806867	0.935416	0.120855	0.350548	0.698289	0.166626	0.204108	0.597113
A_21_P0011474	11200	CHEK2	-0.0168732	0.859196	0.950715	0.0491189	0.607062	0.84215	0.057703	0.546459	0.821704	0.0680906	0.477795	0.806132
A_21_P0011476	11200	CHEK2	0.10616	0.307259	0.624093	-0.00133921	0.98953	0.996647	0.0642735	0.531691	0.814025	0.0611273	0.551707	0.84247
A_24_P303589	8454	CUL1	-0.0637834	0.382813	0.684343	-0.0769891	0.295064	0.620828	-0.00778803	0.913994	0.973439	0.0268366	0.710397	0.91437
A_33_P3413523	10926	DBF4	-0.065304	0.289386	0.60716	-0.0759957	0.220747	0.547503	-0.0164664	0.785452	0.927043	-0.0753969	0.224219	0.615807
A_23_P80032	1869	E2F1	-0.715966	0.000396359	0.0274546	-0.665922	0.000741562	0.0403486	-0.507705	0.00563315	0.126173	-0.598787	0.00174264	0.0881514
A_23_P408955	1870	E2F2	-1.19241	4.15236e-05	0.0100036	-1.08577	0.000106629	0.0199986	-0.862329	0.000857342	0.0591231	-0.949393	0.000374605	0.0454531
A_23_P385034	1871	E2F3	0.0718878	0.278119	0.595304	0.0190751	0.769161	0.920517	0.0970533	0.149725	0.502024	0.042928	0.511573	0.82451
A_33_P3418516	1871	E2F3	0.055762	0.62035	0.839662	-0.0924173	0.415164	0.724021	0.0883375	0.435595	0.759828	0.0547352	0.626748	0.875412
A_23_P152218	1874	E2F4	-0.0368506	0.635782	0.848104	0.0026303	0.972925	0.991711	0.03062	0.69357	0.889445	0.0697763	0.374678	0.742915
A_23_P31721	1875	E2F5	0.0916268	0.564035	0.808436	-0.183529	0.256074	0.581787	-0.00202435	0.989771	0.996655	0.00644084	0.967463	0.991996
A_23_P40693	2033	EP300	0.0774756	0.524382	0.785698	0.0895081	0.463118	0.756379	0.181296	0.148453	0.500979	0.206966	0.102617	0.455465
A_23_P32707	9700	ESPL1	-0.0888877	0.364826	0.670071	-0.160952	0.111675	0.402731	0.00031798	0.997375	0.999221	-0.0341382	0.724528	0.9195
A_33_P3268368	51343	FZR1	-0.0242098	0.731758	0.89652	-0.119194	0.106662	0.394692	-0.0190727	0.786956	0.927697	0.0172032	0.80736	0.949135
A_23_P23221	1647	GADD45A	-0.0206265	0.825849	0.937051	-0.0651413	0.490452	0.772643	0.0152406	0.870803	0.956905	0.0597325	0.526617	0.830583
A_24_P239606	4616	GADD45B	0.0151648	0.828954	0.938195	-0.0972345	0.179556	0.498791	-0.104568	0.150869	0.503559	-0.104762	0.150165	0.529936
A_24_P120934	10912	GADD45G	0.125604	0.239976	0.558256	0.0746136	0.478228	0.765226	0.230659	0.0404796	0.289779	0.149449	0.166187	0.551438
A_33_P3252394	10912	GADD45G	0.0685142	0.444801	0.733871	0.103594	0.254075	0.579888	0.0517554	0.562066	0.830377	0.0919723	0.308948	0.690574
A_23_P251342	2932	GSK3B	-0.00471296	0.940383	0.980202	-0.0450948	0.478165	0.765201	0.0325976	0.606631	0.850936	0.0392528	0.536111	0.835671
A_23_P114656	3065	HDAC1	-0.128549	0.0162643	0.160517	-0.120762	0.0225018	0.191873	-0.0690539	0.165511	0.521178	-0.0913786	0.0731015	0.402671
A_23_P122304	3066	HDAC2	-0.140534	0.0266538	0.202124	-0.146445	0.0217624	0.188113	-0.0765334	0.199709	0.561757	-0.100446	0.0989045	0.44972
A_21_P0012258	8379	MAD1L1	0.278947	0.00102976	0.0424114	0.338723	0.000187129	0.0233899	0.318724	0.000328019	0.0383901	0.248975	0.00248296	0.104529
A_33_P3569068	8379	MAD1L1	0.294298	0.00608064	0.0976668	0.315831	0.00378652	0.0846223	0.371559	0.00111832	0.066068	0.349835	0.00179524	0.0891395
A_33_P3359250	10459	MAD2L2	0.47888	0.0120669	0.138389	0.140157	0.414713	0.723769	0.33026	0.0672401	0.358497	0.179126	0.300756	0.684563
A_23_P23206	10459	MAD2L2	0.193241	0.00934745	0.121747	0.207711	0.00595245	0.10235	0.263579	0.00104502	0.0646781	0.239137	0.00222947	0.099705
A_32_P103633	4171	MCM2	-0.557016	0.000157904	0.017525	-0.528228	0.000259527	0.0264761	-0.405202	0.00234855	0.0861975	-0.465042	0.000793614	0.0610407
A_23_P7873	4172	MCM3	-0.632481	3.7444e-05	0.00931592	-0.623781	4.32214e-05	0.0130102	-0.526548	0.000227898	0.0334735	-0.603956	6.01349e-05	0.0217784
A_23_P370989	4173	MCM4	-0.712025	6.93442e-06	0.00422688	-0.625494	2.84423e-05	0.0103505	-0.433382	0.00090539	0.0601505	-0.547132	0.00011081	0.0279122
A_33_P3284951	4174	MCM5	-0.319241	0.00494508	0.0884599	-0.298339	0.0076552	0.114932	-0.24661	0.0222847	0.222525	-0.248612	0.0213949	0.253845
A_23_P132277	4174	MCM5	-0.45231	5.67696e-05	0.0119782	-0.394311	0.000216316	0.0246459	-0.324421	0.00117567	0.0680882	-0.286884	0.00299269	0.109698
A_23_P90612	4175	MCM6	-0.444799	0.000672125	0.0358021	-0.448438	0.000627117	0.037892	-0.331293	0.00607887	0.130324	-0.362769	0.00328625	0.113199
A_23_P93690	4176	MCM7	-0.444067	0.000109241	0.0149635	-0.427587	0.000157368	0.0225702	-0.297489	0.00323645	0.100124	-0.41479	0.000209634	0.0375831
A_24_P925664	4193	MDM2	-0.26375	0.0441333	0.255535	-0.346964	0.0113325	0.138849	-0.131661	0.289022	0.650786	-0.134024	0.280795	0.667819
A_33_P3361707	4193	MDM2	-0.12386	0.234193	0.551925	-0.067832	0.507293	0.784132	0.049272	0.628803	0.859992	0.000273096	0.997853	0.999846
A_19_P00810040	4193	MDM2	-0.155108	0.172676	0.479413	-0.107813	0.335062	0.65714	0.104856	0.348062	0.696789	-0.00704914	0.948906	0.987041
A_23_P502750	4193	MDM2	-0.0162587	0.898251	0.965659	-0.0445049	0.726818	0.901479	0.0329551	0.795674	0.930686	0.192356	0.145272	0.523659
A_23_P215956	4609	MYC	-0.073807	0.476942	0.754921	-0.0493063	0.633005	0.856807	-0.0925248	0.37502	0.716988	-0.01704	0.868461	0.967709
A_23_P45799	4998	ORC1	-0.724577	0.00306618	0.0692219	-0.648496	0.006501	0.106399	-0.321409	0.136941	0.487235	-0.5723	0.0137392	0.207939
A_33_P3381410	4999	ORC2	0.0790069	0.49763	0.768411	0.0771593	0.507579	0.784172	0.225949	0.0659121	0.355705	0.118667	0.313204	0.694056
A_23_P39616	4999	ORC2	-0.0560142	0.463559	0.746878	-0.0698115	0.363444	0.682373	0.0628678	0.411832	0.744078	-0.0206439	0.78532	0.941835
A_23_P42045	23595	ORC3	0.0436664	0.54586	0.797785	-0.0277967	0.699527	0.888646	0.0223909	0.755657	0.914606	-0.0185459	0.796492	0.945705
A_32_P141612	5000	ORC4	0.117108	0.255314	0.572735	-0.0824109	0.418071	0.725353	0.112611	0.273208	0.638224	0.0604621	0.550309	0.841747
A_23_P131149	5000	ORC4	0.0225077	0.739157	0.899398	-0.0709312	0.302296	0.627974	0.0324325	0.632096	0.861573	0.0195119	0.77274	0.937464
A_24_P394698	5001	ORC5	-0.041308	0.652965	0.858285	-0.0998331	0.285288	0.611175	-0.0233371	0.79899	0.931703	-0.0371705	0.685561	0.902574
A_23_P31414	5001	ORC5	-0.142312	0.033233	0.224118	-0.202393	0.00461585	0.0915653	-0.0966302	0.131648	0.478661	-0.0849862	0.18099	0.567234
A_23_P100344	23594	ORC6	-0.752157	1.82443e-05	0.00673989	-0.731955	2.44144e-05	0.00944877	-0.602784	0.000172281	0.030529	-0.741315	2.13212e-05	0.0128506
A_23_P28886	5111	PCNA	-0.579909	0.000129308	0.0163357	-0.58087	0.000127254	0.021846	-0.428285	0.00179181	0.0778751	-0.480055	0.000715725	0.0585598
A_33_P3258612	5111	PCNA	-0.614872	0.000178494	0.0185002	-0.608953	0.000195523	0.0233899	-0.499511	0.00110423	0.066068	-0.551779	0.000478129	0.0502489
A_19_P00806947	5111	PCNA	-0.625075	2.58769e-05	0.00834701	-0.676045	1.10919e-05	0.00769884	-0.516539	0.000175645	0.030529	-0.553325	9.02701e-05	0.026956
A_33_P3397443	9088	PKMYT1	-0.807282	0.000181285	0.0186501	-0.677677	0.00085594	0.0429697	-0.607275	0.00203841	0.0831185	-0.665128	0.000998131	0.0685533
A_23_P9603	5591	PRKDC	-0.253061	0.0204858	0.178771	-0.196124	0.0627101	0.310331	-0.137149	0.179609	0.538319	-0.142809	0.163396	0.548825
A_33_P3337599	5591	PRKDC	-0.0470997	0.70611	0.884188	-0.158382	0.21618	0.542579	-0.0111303	0.928824	0.978404	-0.0417711	0.737923	0.924708
A_23_P7636	9232	PTTG1	-0.27883	0.104216	0.379824	-0.24362	0.151352	0.462672	-0.161558	0.331583	0.684709	-0.287495	0.0948025	0.442049
A_23_P18579	10744	PTTG2	-0.334543	0.0392851	0.242004	-0.338087	0.0375265	0.245374	-0.176311	0.251565	0.618573	-0.290586	0.0685121	0.39279
A_23_P20463	5885	RAD21	-0.0328105	0.672082	0.86693	0.048096	0.536416	0.801458	0.10998	0.168922	0.524805	0.0116427	0.880272	0.970614
A_23_P204850	5925	RB1	0.0270919	0.633845	0.847174	0.0224331	0.692908	0.885182	0.0336027	0.555514	0.826605	0.0420668	0.462061	0.796494
A_23_P28733	5933	RBL1	-0.421786	0.00315317	0.0700826	-0.398526	0.00467223	0.0915653	-0.320643	0.0172876	0.200225	-0.155866	0.211692	0.604742
A_24_P416159	5934	RBL2	0.121668	0.26732	0.584535	0.103196	0.343874	0.665212	0.223386	0.0519403	0.321771	0.188812	0.0943561	0.441121
A_33_P3246318	9978	RBX1	-0.0250773	0.706912	0.88453	-0.0649147	0.337155	0.659118	0.0215182	0.746805	0.910748	0.0103172	0.876806	0.970151
A_24_P566701	6500	SKP1	0.0795266	0.116877	0.398981	0.0681343	0.174294	0.491812	0.0678083	0.176234	0.533186	0.0691337	0.168456	0.553843
A_23_P133424	6500	SKP1	0.0269151	0.661333	0.862269	-0.0215355	0.725629	0.900875	0.068709	0.272151	0.63742	0.0545732	0.37938	0.746197
A_32_P12580	4087	SMAD2	-0.14184	0.203721	0.515529	-0.14053	0.207697	0.531741	0.0163516	0.880143	0.96012	0.0363474	0.737892	0.924708
A_23_P48936	4088	SMAD3	-0.127682	0.129812	0.420298	-0.26568	0.00465958	0.0915653	-0.125764	0.135224	0.484289	-0.105822	0.203681	0.596864
A_19_P00804817	4089	SMAD4	0.0207819	0.813642	0.932293	0.0181966	0.836437	0.946684	0.0648908	0.465509	0.778247	0.105873	0.240893	0.632866
A_19_P00812250	4089	SMAD4	0.0533199	0.552451	0.801873	0.0668019	0.45828	0.753407	0.188117	0.0493235	0.316808	0.164375	0.0811432	0.419008
A_23_P27346	4089	SMAD4	0.103226	0.433377	0.725424	-0.000523584	0.996794	0.999092	0.121437	0.358696	0.704835	0.08	0.541999	0.83719
A_33_P3290909	8243	SMC1A	-0.0359167	0.640764	0.851257	-0.0327798	0.669998	0.873987	0.0921493	0.240982	0.607721	-0.0867623	0.268303	0.657993
A_33_P3290914	8243	SMC1A	-0.0815808	0.266692	0.583913	-0.0304941	0.672208	0.875382	0.0457777	0.526945	0.811365	-0.0184411	0.797644	0.946129
A_24_P942604	8243	SMC1A	-0.152368	0.070155	0.318414	-0.043228	0.587508	0.831376	0.0662919	0.408747	0.741854	0.0204683	0.796487	0.945705
A_23_P138631	9126	SMC3	-0.105101	0.107494	0.38595	-0.137394	0.0410278	0.256235	0.0195021	0.754693	0.914053	-0.060552	0.33905	0.714634
A_23_P357365	10274	STAG1	-0.18221	0.155908	0.45816	-0.219576	0.0921163	0.367952	-0.0876138	0.483093	0.789039	-0.112096	0.37217	0.74108
A_33_P3304293	10735	STAG2	0.192988	0.0378592	0.238031	0.175132	0.0563932	0.294302	0.286561	0.00420204	0.113133	0.222559	0.0191732	0.242859
A_24_P66125	10735	STAG2	0.00282835	0.975976	0.992812	0.0201476	0.83028	0.944516	0.120135	0.2135	0.577112	0.0947403	0.321628	0.700946
A_33_P3304304	10735	STAG2	-0.158442	0.446658	0.7354	-0.0831755	0.687325	0.882738	-0.00832866	0.96776	0.98956	0.0705191	0.732713	0.921627
A_23_P33856	10735	STAG2	0.0952535	0.226592	0.543739	0.10546	0.183115	0.50365	0.115137	0.148447	0.500979	0.11154	0.160628	0.544631
A_32_P199301	7027	TFDP1	-0.412784	0.00165143	0.0521232	-0.244967	0.0375726	0.245536	-0.199974	0.0820232	0.390527	-0.300921	0.0135081	0.205976
A_33_P3384452	7027	TFDP1	-0.173802	0.076174	0.329769	-0.190847	0.0539988	0.288664	-0.0832982	0.37495	0.716966	-0.185401	0.0603412	0.374026
A_33_P3384432	7029	TFDP2	-0.104374	0.373969	0.677269	-0.083602	0.47418	0.763234	-0.00808433	0.944322	0.983465	0.00109317	0.992465	0.998841
A_24_P79054	7040	TGFB1	0.0175862	0.758829	0.908285	0.0598901	0.304109	0.629759	0.0176056	0.758572	0.91595	0.0559773	0.335667	0.712945
A_24_P402438	7042	TGFB2	-0.360545	0.0255804	0.197624	-0.438028	0.00885683	0.122142	-0.267957	0.0849271	0.397566	-0.286518	0.0673563	0.390259
A_23_P88404	7043	TGFB3	-0.0588704	0.741417	0.900332	-0.0624714	0.726282	0.901218	0.0381137	0.830646	0.943901	0.042253	0.812613	0.950982
A_23_P259586	7272	TTK	-0.524983	0.0150301	0.155215	-0.559215	0.0104988	0.133356	-0.462328	0.0286963	0.250151	-0.420434	0.0437563	0.330606
A_33_P3290567	7465	WEE1	0.0547528	0.647921	0.855258	0.0530058	0.658355	0.868287	0.167671	0.174536	0.531212	0.082757	0.492103	0.814656
A_23_P120414	7529	YWHAB	-0.0581676	0.223201	0.540103	-0.0446654	0.344482	0.665484	-0.0147216	0.751963	0.912714	-0.0164757	0.723676	0.919281
A_33_P3407636	7531	YWHAE	0.281787	0.152219	0.453336	0.115938	0.543684	0.80614	0.20435	0.290942	0.652037	0.0436675	0.818082	0.952103
A_24_P33444	7531	YWHAE	-0.0899123	0.354527	0.66075	-0.159926	0.110293	0.400934	-0.0217223	0.820476	0.939527	-0.0401781	0.675353	0.897808
A_24_P106681	7532	YWHAG	-0.0837761	0.103182	0.377789	-0.0385286	0.436624	0.73893	-0.0221531	0.65234	0.869955	-0.0625219	0.21453	0.607371
A_23_P103070	7533	YWHAH	-0.259097	0.00212509	0.0582179	-0.236048	0.00414724	0.088329	-0.143267	0.0574851	0.333838	-0.154446	0.0425002	0.326787
A_23_P131723	10971	YWHAQ	-0.0832265	0.159866	0.463214	-0.0220111	0.700837	0.888841	-0.0402184	0.48534	0.790133	-0.0339151	0.55529	0.843628
A_33_P3662553	10971	YWHAQ	-0.00535945	0.920597	0.973542	0.0224448	0.677233	0.878173	0.0587113	0.284633	0.64825	0.0342057	0.527523	0.831243
A_32_P198923	7534	YWHAZ	0.20449	0.0152109	0.156091	0.165061	0.0427245	0.260232	0.161086	0.0472678	0.310643	0.182529	0.0271996	0.27983
A_32_P226149	7534	YWHAZ	0.0476213	0.501883	0.771251	-0.0036415	0.958717	0.987493	0.0725452	0.311307	0.668888	0.0416948	0.555826	0.843873
A_23_P654	7709	ZBTB17	0.0354877	0.716148	0.888923	0.0871007	0.377685	0.693905	0.105645	0.287682	0.649543	0.110449	0.267197	0.657264
